# Supplementary material for: Triton B-promoted regioselective intramolecular addition of enolates to tethered ynamides for the construction of 8-membered O-heterocycles
Source: Royal Society of Chemistry journal article supplement (doi:10.1039/d2qo00873d), 2022-01-01

*Supporting Information*

## **Triton B-Promoted Regioselective Intramolecular Addition of Enolates to Tethered Ynamides for the Construction of 8-Membered O-Heterocycles.**

Santanu Ghosh<sup>a</sup>, Yongxiang Zheng<sup>a</sup>, Daniele Maccarone<sup>b</sup>, Feven-Alemu Korsaye<sup>b</sup>, Ilaria Ciofini<sup>b</sup> and Laurence Miesch<sup>\*a</sup>

[a] Equipe Synthèse Organique et Phytochimie,, Institut de Chimie,CNRS-UdS, UMR 7177,4 rue Blaise Pascal, CS 90032, 67081 Strasbourg, France

[b] Chimie ParisTech, PSL University, CNRS, Institute of Chemistry for Life and Health Sciences, Chemical Theory and Modelling Group, F-75005 Paris, France

Corresponding author: [lmiesch@unistra.fr](mailto:lmiesch@unistra.fr)

### **Contents**

|                                  |        |
|----------------------------------|--------|
| Experimental procedure .....     | 3-4    |
| Characterization data .....      | 4-74   |
| X-Ray Crystallography data ..... | 75-84  |
| Computational details .....      | 85-118 |

## General remarks

All reactions were carried under argon atmosphere. DMF, acetone, THF, toluene, MeCN and acetic acid were used as received from Sigma Aldrich. CH<sub>2</sub>Cl<sub>2</sub> was dried using a dry solvent station GT S100 system.

NMR Spectra (<sup>1</sup>H, <sup>13</sup>C) were performed at 298 K. <sup>1</sup>H (500 MHz or 300 MHz), <sup>13</sup>C (125 MHz) were recorded using a Bruker AV-300 or AV-500 spectrometer with the solvent residual peak as internal standard (chloroform,  $\delta = 7.26$  ppm /  $\delta = 77.16$  ppm, benzene,  $\delta = 7.16$  ppm /  $\delta = 128.06$  ppm). <sup>19</sup>F NMR (282 MHz) were recorded using a Bruker AV-300 spectrometer without internal standard. Data are presented as follows: chemical shift (ppm), multiplicity (s = singlet, d = doublet, t = triplet, q = quartet, sept = septet, m = multiplet, br = broad), coupling constant *J* (Hz) and integration.

HRMS data were recorded on a micro TOF spectrometer equipped with an orthogonal electrospray (ESI) interface.

Thin layer chromatography was performed using Merck TLC silica gel 60 F<sub>254</sub> aluminium sheets using petroleum ether/EtOAc or CH<sub>2</sub>Cl<sub>2</sub>/acetone as eluant and visualized using permanganate stain, ninhydrin stain, vanillin stain and/or UV light. Merck Geduran® 40-63  $\mu$ m silica gel was used for column chromatography.

Infrared spectra were reported in frequency of absorption using Alpha Bruker Optics spectrometer.

## Experimental procedure

### 1. Experimental procedure for compound 1 and compound 3

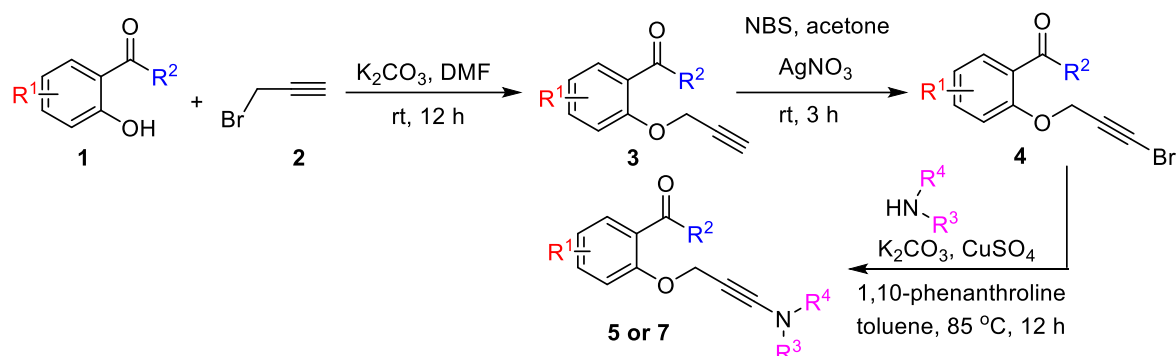

#### General procedure for compound 5 and compound 7:

**Step 1:** To a mixture of 2-hydroxy acetophenone (0.2 mmol, 1.0 equiv) and  $K_2CO_3$  (2.0 equiv), in DMF was added a solution of a propargyl bromide (1.1 equiv, 1.0 M) in toluene. The reaction mixture was stirred for 12 h while being monitored with TLC analysis. Upon completion, the reaction mixture was diluted with EtOAc (10 mL) and filtered, and the filtrate was quenched with 1 (N) HCl (10 mL). The aqueous layer was extracted with EtOAc (3 x 10 mL). The organic layer was washed with brine solution (10 mL), dried over  $Na_2SO_4$  and filtered. Solvent was evaporated to get analytically pure product and proceeds for the next step without further purification.

**Step 2:** Then alkyne acetophenone derivative (0.2 mmol, 1.0 equiv) was treated with NBS (1.2 equiv) and  $AgNO_3$  (0.2 equiv) in acetone. The reaction mixture was stirred for 12 h while being monitored with TLC analysis. Upon completion, the reaction mixture was diluted with EtOAc (10 mL) and filtered, and the filtrate was quenched with water. The aqueous layer was extracted with EtOAc (3 x 10 mL). The organic layer was washed with a saturated  $NaHCO_3$  solution (10 mL), dried ( $Na_2SO_4$ ) and filtered. Solvent was evaporated to get analytically pure product and proceeds for the next step without further purification.

**Step 3:** To a mixture of bromo- alkyne (0.2 mmol, 1.1 equiv) in toluene,  $K_2CO_3$  (2.5 equiv), amine derivative (1 equiv), Copper (II) sulfate ( $CuSO_4$ ) (0.2 equiv) and 1, 10 - Phenanthroline (0.3 equiv) was added successively. The reaction mixture was reacted at 85 °C for 12 h while being monitored with TLC analysis. Upon completion, the reaction mixture was cooled at room temperature and diluted with EtOAc (10 mL) and filtered, and the filtrate was quenched with 1N HCl (1 mL). The aqueous layer was extracted with EtOAc (3 x 10 mL). The organic layer was washed with brine solution (10 mL), dried ( $Na_2SO_4$ ) and filtered. After evaporation of solvent, the crude product was subjected to column chromatography on silica gel using a petroleum ether/EtOAc mixture to get the desired ynamides 5 and 7. Ynamides (5b, 5d, 5e, 5g, 5j and 5k), were not purified and we proceeded directly with the next step without any further purification.

## 2. Experimental procedure for compound 6 and compound 8

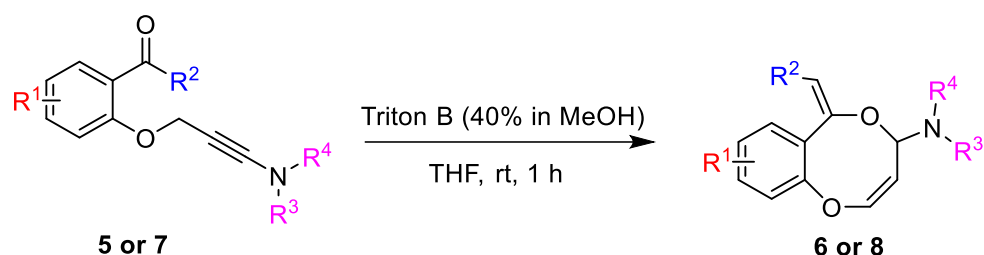

**General procedure for 6 and 8:** To a solution of ynamide **5** or **7** (0.2 mmol, 1.0 equiv) in anhydrous THF (2 mL) was added Triton B (2.5 equiv, 40% in MeOH) *via* syringe over a period of 5 minutes. The resulting solution was stirred at RT. After TLC indicated that the starting material was completely consumed, the solution was concentrated in vacuo, purified by column chromatography on silica gel using a mixture of petroleum ether/EtOAc as eluent to afford the desired product **6** or **8**.

## Characterization data

**Compound 6a:** (Z)-N,4-dimethyl-N-(6-methylene-4*H*,6*H*-benzo[*b*][1,5]dioxin-4-yl)benzenesulfonamide

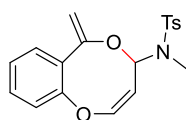

$C_{19}H_{19}NO_4S$   
MW: 357.42 g. mol<sup>-1</sup>  
Colorless liquid  
64% (46 mg, 0.13 mmol)

**<sup>1</sup>H NMR (500 MHz, C<sub>6</sub>D<sub>6</sub>):**  $\delta$  = 7.55 – 7.47 (m, 3H), 7.30 – 7.28 (m, 1H), 6.92 – 6.85 (m, 2H), 6.74 – 6.66 (m, 1H), 6.62 (d, *J* = 8.0 Hz, 2H), 5.19 (d, *J* = 6.1 Hz, 1H), 4.78 – 4.74 (m, 2H), 4.70 (d, *J* = 2.0 Hz, 1H), 2.35 (s, 3H), 1.80 (s, 3H) ppm.

**<sup>13</sup>C NMR (126 MHz, C<sub>6</sub>D<sub>6</sub>):**  $\delta$  = 153.2, 152.7, 143.3, 135.3, 134.0, 129.9, 129.6, 128.0, 127.6, 126.9, 124.3, 122.1, 118.6, 117.3, 104.1, 97.8, 87.4, 31.1, 20.7 ppm.

**HRMS (ESI-TOF) m/z:** [M+H]<sup>+</sup> calcd for C<sub>19</sub>H<sub>20</sub>NO<sub>4</sub>S 358.1108; Found 358.1103.

**IR (neat):**  $\nu$  = 2995, 2940, 1736, 1448, 1372, 1235, 1165, 1043, 970 cm<sup>-1</sup>

**R<sub>f</sub>:** 0.50 (Petroleum ether / Ethyl acetate 4:1 v/v, UV)



**Compound 6b:** (Z)-N-butyl-4-methyl-N-(6-methylene-4H,6H-benzo[b][1,5]dioxocin-4-yl)benzenesulfonamide

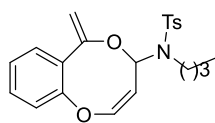

$C_{22}H_{25}NO_4S$   
MW: 399.51 g. mol<sup>-1</sup>  
Colorless liquid  
60% (48 mg, 0.12mmol)

**<sup>1</sup>H NMR (500 MHz, C<sub>6</sub>D<sub>6</sub>):**  $\delta$  = 7.59 (d,  $J$  = 8.2 Hz, 2H), 7.51 (d,  $J$  = 14.4 Hz, 1H), 7.30 (d,  $J$  = 6.9 Hz, 1H), 6.93 – 6.86 (m, 2H), 6.71 (t,  $J$  = 7.4 Hz, 1H), 6.66 (d,  $J$  = 8.0 Hz, 2H), 5.22 (d,  $J$  = 6.2 Hz, 1H), 5.00 (dd,  $J$  = 14.4, 6.4 Hz, 1H), 4.73 (dd,  $J$  = 30.4, 1.8 Hz, 2H), 3.08 (d,  $J$  = 7.5 Hz, 2H), 1.83 (s, 3H), 1.44 – 1.38 (m, 2H), 1.04 – 0.91 (m, 2H), 0.64 (t,  $J$  = 7.4 Hz, 3H) ppm.

**<sup>13</sup>C NMR (126 MHz, C<sub>6</sub>D<sub>6</sub>):**  $\delta$  = 153.3, 152.7, 143.2, 136.7, 133.0, 129.9, 129.6 ( $\times 2$ ), 126.8 ( $\times 2$ ), 124.28, 122.1, 118.6, 117.3, 103.3, 98.2, 87.4, 45.0, 28.5, 20.7, 19.8, 13.3 ppm.

**HRMS (ESI/Q-TOF) m/z:** [M+Na]<sup>+</sup> calcd for C<sub>22</sub>H<sub>25</sub>NNaO<sub>4</sub>S 422.1396; Found 422.1403.

**IR (neat):**  $\nu$  = 2930, 2842, 1736, 1349, 1372, 1235, 1161, 1043, 1055, 982 cm<sup>-1</sup>

**R<sub>f</sub>:** 0.50 (Petroleum ether / Ethyl acetate 5:1 v/v, UV)

**Compound 6c:** (Z)-N-cyclopropyl-4-methyl-N-(6-methylene-4H,6H-benzo[b][1,5]dioxocin-4-yl)benzenesulfonamide

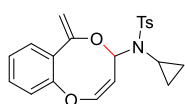

$C_{21}H_{21}NO_4S$   
MW: 383.46 g. mol<sup>-1</sup>  
Colourless liquid  
61% (47 mg, 0.12 mmol)

**<sup>1</sup>H NMR (500 MHz, C<sub>6</sub>D<sub>6</sub>)**  $\delta$  = 7.65 (d,  $J$  = 8.0 Hz, 2H), 7.51 (d,  $J$  = 14.2 Hz, 1H), 7.32 – 7.30 (m, 1H), 6.94 – 6.85 (m, 2H), 6.73 – 6.69 (m, 3H), 5.36 (dd,  $J$  = 14.2, 6.2 Hz, 1H), 5.25 (d,  $J$  = 6.2 Hz, 1H), 4.74 (dd,  $J$  = 29.5, 2.0 Hz, 2H), 1.85 (s, 3H), 1.35 – 1.33 (m, 1H), 0.87 - 0.86 (m, 2H), 0.28 – 0.26 (m, 2H) ppm.

**<sup>13</sup>C NMR (126 MHz, C<sub>6</sub>D<sub>6</sub>)**  $\delta$  = 153.2, 152.7, 143.4, 135.3, 135.1, 129.9, 129.5, 128.0, 127.6, 127.4, 124.2, 122.1, 118.7, 117.3, 106.6, 97.9, 87.4, 26.7, 20.8, 7.7, 7.7 ppm.

**HRMS (ESI/Q-TOF) m/z:** [M+Na]<sup>+</sup> calcd for C<sub>21</sub>H<sub>21</sub>NNaO<sub>4</sub>S 406.1083; Found 406.1085.

**IR (neat):**  $\nu$  = 2916, 2860, 1662, 1634, 1463, 1365, 1309, 1229, 1169, 1124, 1048, 586 cm<sup>-1</sup>

**R<sub>f</sub>:** 0.50 (Petroleum ether / Ethyl acetate 6:1 v/v, UV)

**Compound 6d** : (Z)-N-cyclopentyl-4-methyl-N-(6-methylene-4H,6H-benzo[b][1,5]dioxocin-4-yl)benzenesulfonamide

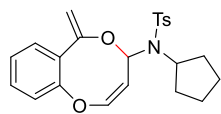

$C_{23}H_{25}NO_4S$   
MW: 411.52 g. mol<sup>-1</sup>  
Colorless liquid  
58% (48 mg, 0.17 mmol)

**<sup>1</sup>H NMR (300 MHz, C<sub>6</sub>D<sub>6</sub>):**  $\delta$  = 7.67 – 7.56 (m, 2H), 7.38 – 7.25 (m, 2H), 6.95 – 6.83 (m, 2H), 6.74 – 6.61 (m, 3H), 5.36 (dd,  $J$  = 14.7, 6.3 Hz, 1H), 5.23 – 5.21 (m, 1H), 4.74 (dd,  $J$  = 13.8, 1.9 Hz, 2H), 1.83 (s, 3H), 1.78 – 1.75 (m, 1H), 1.42 – 1.16 (m, 6H), 1.07 – 0.98 (m, 2H) ppm.

**<sup>13</sup>C NMR (126 MHz, C<sub>6</sub>D<sub>6</sub>):**  $\delta$  = 153.3, 152.8, 143.1, 137.4, 130.4, 129.9, 129.5, 128.0, 127.6, 127.0, 124.3, 122.1, 118.7, 117.4, 105.3, 98.8, 87.4, 58.2, 26.2, 24.3, 20.8 ppm.

**HRMS (ESI/Q-TOF) m/z:** [M+Na]<sup>+</sup> calcd for C<sub>23</sub>H<sub>25</sub>NNaO<sub>4</sub>S 434.1397; Found 434.1394.

**IR (neat):**  $\nu$  = 2957, 1662, 1462, 1355, 1225, 1160, 985, 760, 666 cm<sup>-1</sup>

**R<sub>f</sub>:** 0.50 (Petroleum ether / Ethyl acetate 6:1 v/v, UV)

**Compound 6e** : (Z)-N-cyclohexyl-4-methyl-N-(6-methylene-4H,6H-benzo[b][1,5]dioxocin-4-yl)benzenesulfonamide

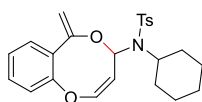

$C_{24}H_{27}NO_4S$   
MW: 425.54 g. mol<sup>-1</sup>  
Colorless liquid

56% (48 mg, 0.11 mmol)

**<sup>1</sup>H NMR (300 MHz, CDCl<sub>3</sub>)**  $\delta$  = 7.75 (d,  $J$  = 8.3 Hz, 2H), 7.37 (t,  $J$  = 10.7 Hz, 2H), 6.99 (d,  $J$  = 3.6 Hz, 2H), 6.81 – 6.72 (m, 3H), 5.72 (dd,  $J$  = 14.7, 6.3 Hz, 1H), 5.35 – 5.33 (m, 1H), 4.83 (dd,  $J$  = 12.5, 1.9 Hz, 2H), 4.07 – 3.90 (m, 1H), 1.89 (s, 3H), 1.80 – 1.72 (m, 2H), 1.58 – 1.55 (m, 2H), 1.47 – 1.38 (m, 2H), 1.07 – 0.90 (m, 3H), 0.80 – 0.66 (m, 1H) ppm.

**<sup>13</sup>C NMR (126 MHz, CDCl<sub>3</sub>)**  $\delta$  = 153.5, 152.9, 143.1, 138.3, 131.5, 123.0, 129.6, 128.1, 127.7, 127.0, 124.4, 122.2, 118.8, 117.4, 105.9, 99.0, 87.5, 58.8, 29.6, 29.5, 26.1, 24.9, 20.8 ppm.

**HRMS (ESI/Q-TOF) m/z:** [M+Na]<sup>+</sup> calcd for C<sub>24</sub>H<sub>27</sub>NNaO<sub>4</sub>S 448.1553; Found 448.1542.

**IR (neat):**  $\nu$  = 2934, 2857, 1668, 1611, 1451, 1339, 1303, 1159, 1089, 667 cm<sup>-1</sup>

**R<sub>f</sub>:** 0.50 (Petroleum ether / Ethyl acetate 7:1 v/v, UV)

**Compound 6f:** (Z)-N-benzyl-4-methyl-N-(6-methylene-4H,6H-benzo[b][1,5]dioxocin-4-yl)benzenesulfonamide

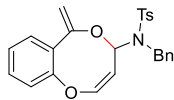

$C_{25}H_{23}NO_4S$   
MW: 433.52 g. mol<sup>-1</sup>  
Colorless liquid  
68% (59 mg, 0.14 mmol)

**<sup>1</sup>H NMR (500 MHz, C<sub>6</sub>D<sub>6</sub>):**  $\delta$  = 7.62 (d,  $J$  = 14.2 Hz, 1H), 7.57 (d,  $J$  = 8.4 Hz, 2H), 7.24 – 7.22 (m, 1H), 7.15 – 7.14 (m, 2H), 7.04 – 6.94 (m, 3H), 6.86 – 6.82 (m, 1H), 6.75 – 6.73 (m, 1H), 6.68 – 6.60 (m, 3H), 5.08 – 5.07 (m, 1H), 4.95 (dd,  $J$  = 14.3, 5.6 Hz, 1H), 4.64 (dd,  $J$  = 47.7, 1.9 Hz, 2H), 4.26 (q,  $J$  = 16.2 Hz, 2H), 1.84 (s, 3H) ppm.

**<sup>13</sup>C NMR (126 MHz, C<sub>6</sub>D<sub>6</sub>):**  $\delta$  = 153.0, 152.5, 143.4, 136.5, 135.0, 132.5, 129.7, 129.6, 128.5, 128.0, 127.6, 127.5, 127.0, 126.9, 124.1, 122.0, 118.6, 117.3, 105.1, 97.4, 87.4, 49.3, 20.8 ppm.

**HRMS (ESI/Q-TOF) m/z:** [M+Na]<sup>+</sup> calcd for C<sub>25</sub>H<sub>23</sub>NNaO<sub>4</sub>S 456.1239; Found 456.1240.

**IR (neat):**  $\nu$  = 2968, 2925, 1765, 1720, 1468, 1359, 1304, 1162, 1012, 975, 758 cm<sup>-1</sup>

**R<sub>f</sub>:** 0.50 (Petroleum ether / Ethyl acetate 4:1 v/v, UV)

**Compound 6g:** (Z)-4-methyl-N-(6-methylene-4H,6H-benzo[b][1,5]dioxocin-4-yl)-N-phenethylbenzenesulfonamide

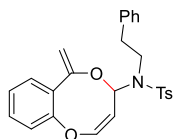

$C_{26}H_{25}NO_4S$   
MW: 447.55 g. mol<sup>-1</sup>  
Colorless liquid  
67% (60 mg, 0.13 mmol)

**<sup>1</sup>H NMR (500 MHz, C<sub>6</sub>D<sub>6</sub>):**  $\delta$  = 7.57 – 7.52 (m, 3H), 7.31 (d,  $J$  = 7.8 Hz, 1H), 7.05 – 7.00 (m, 3H), 6.93 – 6.89 (m, 2H), 6.87 – 6.84 (m, 2H), 6.74 – 6.69 (m, 1H), 6.61 (d,  $J$  = 7.5 Hz, 2H), 5.25 (d,  $J$  = 6.2 Hz, 1H), 5.12 (dd,  $J$  = 14.4, 6.2 Hz, 1H), 4.82 – 4.70 (m, 2H), 3.35 – 3.32 (m, 2H), 2.84 – 2.76 (m, 2H), 1.80 (s, 3H) ppm.

**<sup>13</sup>C NMR (126 MHz, C<sub>6</sub>D<sub>6</sub>):**  $\delta$  = 153.2, 152.7, 143.3, 137.8, 136.5, 132.6, 129.9, 129.6, 128.6, 128.5, 128.0, 127.6, 126.8, 126.5, 124.3, 122.2, 118.6, 117.4, 103.2, 98.1, 87.5, 46.9, 33.2, 20.7 ppm.

**HRMS (ESI/Q-TOF) m/z:** [M+H]<sup>+</sup> calcd for C<sub>26</sub>H<sub>26</sub>NO<sub>4</sub>S 448.1577; Found 448.1562.

**IR (neat):**  $\nu$  = 3029, 2925, 1739, 1613, 1461, 1359, 1304, 1162, 961, 757 cm<sup>-1</sup>

**R<sub>f</sub>:** 0.50 (Petroleum ether / Ethyl acetate 5:1 v/v, UV)

**Compound 6h** : 4-methyl-*N*-((*Z*)-6-methylene-4*H*,6*H*-benzo[*b*][1,5]dioxocin-4-yl)-*N*-((*S*)-1-phenylethyl)benzenesulfonamide

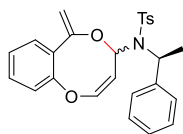

$C_{26}H_{25}NO_4S$   
MW: 447.55 g. mol<sup>-1</sup>  
Colorless liquid  
65% (58 mg, 0.13 mmol)

<sup>1</sup>H NMR (500 MHz, C<sub>6</sub>D<sub>6</sub>): δ = 7.60 (d, *J* = 8.2 Hz, 2H), 7.36 – 7.32 (m, 1H), 7.21 – 7.19 (m, 3H), 7.06 – 7.01 (m, 2H), 6.99 – 6.97 (m, 1H), 6.84 – 6.77 (m, 2H), 6.72 – 6.70 (m, 1H), 6.64 (d, *J* = 7.9 Hz, 2H), 5.45 (q, *J* = 7.0 Hz, 1H), 5.12 – 5.05 (m, 1H), 5.05 – 4.99 (m, 1H), 4.68 – 6.66 (m, 1H), 4.62 – 4.55 (m, 1H), 1.83 (s, 3H), 1.20 (t, *J* = 7.0, 3H) ppm.

<sup>13</sup>C NMR (126 MHz, C<sub>6</sub>D<sub>6</sub>): δ = 153.1, 153.1, 152.6, 152.5, 143.3, 143.3, 138.6, 138.6, 137.2, 137.2, 129.7, 129.6, 129.6, 129.6, 128.5, 128.0, 127.8, 127.6, 127.3, 127.1, 126.7, 126.7, 124.1, 124.1, 121.9, 121.91, 118.6, 118.6, 117.3, 117.3, 106.3, 106.2, 98.1, 98.1, 87.4, 87.3, 55.1, 55.0, 20.8, 14.5, 14.3 ppm.

HRMS (ESI/Q-TOF) *m/z*: [M+Na]<sup>+</sup> calcd for C<sub>26</sub>H<sub>25</sub>NNaO<sub>4</sub>S 470.1396; Found 470.1400.

IR (neat): ν = 2984, 1735, 1615, 1372, 1235, 1168, 1043, 936, 665 cm<sup>-1</sup>

R<sub>f</sub>: 0.50 (Petroleum ether / Ethyl acetate 5:1 v/v, UV)

**Compound 6i** : (*Z*)-*N*-(benzo[*d*][1,3]dioxol-5-ylmethyl)-4-methyl-*N*-((6-methylene-4*H*,6*H*-benzo[*b*][1,5]dioxocin-4-yl)benzenesulfonamide

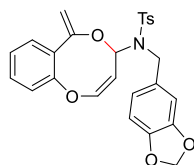

$C_{26}H_{23}NO_6S$   
MW: 477.53 g. mol<sup>-1</sup>  
Colorless liquid  
62% (59 mg, 0.12 mmol)

<sup>1</sup>H NMR (500 MHz, C<sub>6</sub>D<sub>6</sub>): δ = 7.59 – 7.55 (m, 3H), 7.24 – 7.23 (m, 1H), 6.85 – 6.82 (m, 2H), 6.76 – 6.74 (m, 1H), 6.68 – 6.64 (m, 3H), 6.55 – 6.47 (m, 2H), 5.21 (s, 2H), 5.14 – 5.08 (m, 1H), 5.03 (dd, *J* = 14.3, 5.8 Hz, 1H), 4.65 (dd, *J* = 49.5, 1.9 Hz, 2H), 4.23 – 4.09 (m, 2H), 1.85 (s, 3H) ppm.

<sup>13</sup>C NMR (126 MHz, C<sub>6</sub>D<sub>6</sub>): δ = 153.0, 152.5, 148.3, 147.3, 143.5, 136.4, 132.6, 129.8, 129.7, 128.7, 128.0, 127.8, 127.6, 127.0, 124.2, 122.1, 120.4, 118.5, 117.3, 108.2, 107.5, 105.1, 100.7, 97.6, 87.5, 49.2, 20.8 ppm.

HRMS (ESI/Q-TOF) *m/z*: [M+Na]<sup>+</sup> calcd for C<sub>26</sub>H<sub>23</sub>NNaO<sub>6</sub>S 500.1138; Found 500.1140.

IR (neat): ν = 3048, 2968, 3028, 2951, 2139, 1679, 1351, 1246, 1030, 886 cm<sup>-1</sup>

R<sub>f</sub>: 0.50 (Petroleum ether / Ethyl acetate 3:1 v/v, UV)

**Compound 6j:** ((Z)-N-allyl-4-methyl-N-(6-methylene-4H,6H-benzo[b][1,5]dioxocin-4-yl)benzenesulfonamide

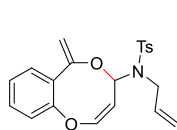

$C_{21}H_{21}NO_4S$   
MW: 383.46 g. mol<sup>-1</sup>  
Colorless liquid  
59% (45 mg, 0.12 mmol)

<sup>1</sup>H NMR (500 MHz, C<sub>6</sub>D<sub>6</sub>)  $\delta$  = 7.56 – 7.51 (m, 3H), 7.29 – 7.27 (m, 1H), 6.91 – 6.85 (m, 2H), 6.71 – 6.67 (m, 1H), 6.63 (d,  $J$  = 8.0 Hz, 2H), 5.38 – 5.30 (m, 1H), 5.19 (dd,  $J$  = 6.2, 0.4 Hz, 1H), 5.02 (dd,  $J$  = 14.3, 6.2 Hz, 1H), 4.86 – 4.78 (m, 2H), 4.72 (dd,  $J$  = 28.2, 1.9 Hz, 2H), 3.69 (d,  $J$  = 5.1 Hz, 2H), 1.81 (s, 3H) ppm.

<sup>13</sup>C NMR (126 MHz, C<sub>6</sub>D<sub>6</sub>) :  $\delta$  = 153.2, 152.7, 143.3, 136.7, 132.5, 130.9, 129.8, 129.6, 128.0, 127.6, 126.0, 124.2, 122.1, 118.6, 117.8, 117.3, 104.3, 98.0, 87.4, 47.8, 20.7 ppm.

HRMS (ESI/Q-TOF) m/z: [M+Na]<sup>+</sup> calcd for C<sub>21</sub>H<sub>21</sub>NNaO<sub>4</sub>S 406.1083; Found 406.1061.

IR (neat):  $\nu$  = 2922, 1745, 1669, 1614, 1449, 1363, 1305, 1163, 1088, 947, 547 cm<sup>-1</sup>

R<sub>f</sub>: 0.50 (Petroleum ether / Ethyl acetate 5:1 v/v, UV)

**Compound 6k:** (Z)-4-methyl-N-(6-methylene-4H,6H-benzo[b][1,5]dioxocin-4-yl)-N-(pent-4-yn-1-yl)benzenesulfonamide

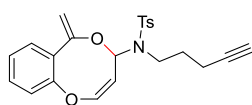

$C_{23}H_{23}NO_4S$   
MW: 409.50 g. mol<sup>-1</sup>  
Colorless liquid  
63% (52 mg, 0.13 mmol)

<sup>1</sup>H NMR (500 MHz, C<sub>6</sub>D<sub>6</sub>):  $\delta$  = 7.58 (d,  $J$  = 8.2 Hz, 2H), 7.49 (d,  $J$  = 14.4 Hz, 1H), 7.31 – 7.27 (m, 1H), 6.93 – 6.85 (m, 2H), 6.73 – 6.68 (m, 1H), 6.64 (d,  $J$  = 8.1 Hz, 2H), 5.21 (d,  $J$  = 6.2 Hz, 1H), 5.08 (dd,  $J$  = 14.4, 6.2 Hz, 1H), 4.74 (dd,  $J$  = 27.9, 1.9 Hz, 2H), 3.19 (t,  $J$  = 7.0 Hz, 2H), 1.82 (s, 3H), 1.74 – 1.71 (m, 2H), 1.66 – 1.64 (dd,  $J$  = 4.9, 2.3 Hz, 1H), 1.58 – 1.51 (m, 2H) ppm.

<sup>13</sup>C NMR (126 MHz, C<sub>6</sub>D<sub>6</sub>):  $\delta$  = 153.2, 152.7, 143.3, 136.5, 132.8, 129.9, 129.6, 128.0, 127.8, 127.4, 124.3, 122.1, 118.6, 117.4, 103.3, 98.1, 87.5, 82.5, 69.5, 44.2, 25.2, 20.8, 15.5 ppm.

HRMS (ESI/Q-TOF) m/z: [M+Na]<sup>+</sup> calcd for C<sub>23</sub>H<sub>23</sub>NNaO<sub>4</sub>S 432.1240; Found 432.1219.

IR (neat):  $\nu$  = 3028, 2926, 1672, 1622, 1452, 1326, 1177, 1128, 1031, 701 cm<sup>-1</sup>

R<sub>f</sub>: 0.50 (Petroleum ether / Ethyl acetate 6:1 v/v, UV)

**Compound 6l:** (Z)-N-(2-(1,3-dioxolan-2-yl)ethyl)-4-methyl-N-(6-methylene-4H,6H-benzo[b][1,5]dioxocin-4-yl)benzenesulfonamide

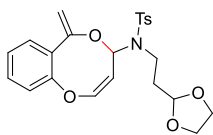

$C_{23}H_{25}NO_6S$   
MW: 443.51 g. mol<sup>-1</sup>  
Colorless liquid  
62% (55 mg, 0.12 mmol)

**<sup>1</sup>H NMR (500 MHz, C<sub>6</sub>D<sub>6</sub>)**  $\delta$  = 7.60 – 7.57 (m, 2H), 7.55 (d,  $J$  = 14.1 Hz, 1H), 7.31 – 7.29 (m, 1H), 6.892 - 6.85 (m, 2H), 6.73 – 6.67 (m, 1H), 6.62 (d,  $J$  = 8.0 Hz, 2H), 5.30 – 5.23 (m, 2H), 4.72 (dd,  $J$  = 36.2, 1.9 Hz, 2H), 4.57 (t,  $J$  = 4.0 Hz, 1H), 3.53 (t,  $J$  = 4.0 Hz, 2H), 3.33 - 3.30 (m, 2H), 3.20 – 3.17 (m, 2H), 2.04 – 1.95 (m, 2H), 1.80 (s, 3H) ppm.

**<sup>13</sup>C NMR (126 MHz, C<sub>6</sub>D<sub>6</sub>)**:  $\delta$  = 153.3, 152.7, 143.3, 136.5, 132.6, 129.8, 129.6, 128.0, 126.9, 124.2, 122.1, 118.6, 117.4, 103.3, 101.8, 98.1, 87.4, 64.5, 40.2, 30.3, 20.8 ppm.

**HRMS (ESI/Q-TOF) m/z**: [M+Na]<sup>+</sup> calcd for C<sub>23</sub>H<sub>25</sub>NNaO<sub>6</sub>S 466.1295; Found 466.1305.

**IR (neat)**:  $\nu$  = 2955, 2886, 1734, 1661, 1613, 1486, 1461, 1357, 1303, 1160, 945, 757 cm<sup>-1</sup>

**R<sub>f</sub>**: 0.50 (Petroleum ether / Ethyl acetate 5:1 v/v, UV)

**Compound 6m**: (Z)-N-benzyl-N-(6-methylene-4H,6H-benzo[b][1,5]dioxocin-4-yl)methanesulfonamide

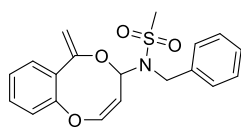

$C_{19}H_{19}NO_4S$   
MW: 357.42 g. mol<sup>-1</sup>  
Colorless liquid  
64% (46 mg, 0.13 mmol)

**<sup>1</sup>H NMR (500 MHz, C<sub>6</sub>D<sub>6</sub>)**  $\delta$  = 7.28 – 7.20 (m, 2H), 7.13 (d,  $J$  = 8.5 Hz, 2H), 7.04 – 6.96 (m, 3H), 6.89 – 6.83 (m, 1H), 6.78 (d,  $J$  = 8.2 Hz, 1H), 6.67 (t,  $J$  = 8.2 Hz, 1H), 5.03 (d,  $J$  = 6.1 Hz, 1H), 5.00 – 4.94 (m, 1H), 4.67 (dd,  $J$  = 39.5, 1.9 Hz, 2H), 4.17 (dd,  $J$  = 18.2, 4.6 Hz, 2H), 1.98 (s, 3H) ppm.

**<sup>13</sup>C NMR (126 MHz, C<sub>6</sub>D<sub>6</sub>)**  $\delta$  = 153.1, 152.6, 135.1, 132.4, 129.8, 128.6, 128.0, 126.9, 124.2, 122.1, 118.55, 117.3, 104.3, 97.6, 87.4, 48.9, 38.9 ppm.

**HRMS (ESI/Q-TOF) m/z**: [M+H]<sup>+</sup> calcd for C<sub>19</sub>H<sub>19</sub>NNaO<sub>4</sub>S 380.0927; Found 380.0940.

**IR (neat)**:  $\nu$  = 3029, 2954, 1666, 1636, 1462, 1354, 1313, 1225, 1155, 1052, 944 cm<sup>-1</sup>

**R<sub>f</sub>**: 0.50 (Petroleum ether / Ethyl acetate 6:1 v/v, UV)

**Compound 6n** : (Z)-N-benzyl-2,4,6-triisopropyl-N-(6-methylene-4H,6H-benzo[b][1,5]dioxocin-4-yl)benzenesulfonamide

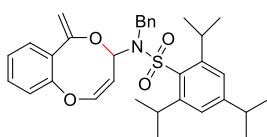

$C_{33}H_{39}NO_4S$   
MW: 545.74 g. mol<sup>-1</sup>  
Colorless liquid  
66% (72 mg, 0.13 mmol)

<sup>1</sup>H NMR (300 MHz, C<sub>6</sub>D<sub>6</sub>): δ = 7.62 (d, *J* = 13.9 Hz, 1H), 7.23 – 7.19 (m, 5H), 7.06 – 7.00 (m, 2H), 6.96 – 6.93 (m, 1H), 6.87 – 6.81 (m, 1H), 6.74 – 6.71 (m, 1H), 6.67 – 6.60 (m, 1H), 5.02 – 4.89 (m, 2H), 4.61 (dd, *J* = 30.2, 1.9 Hz, 2H), 4.44 – 4.36 (m, 4H), 2.60 – 2.55 (m, 1H), 1.28 (d, *J* = 6.7 Hz, 12H), 1.06 (d, *J* = 6.9 Hz, 6H) ppm.

<sup>13</sup>C NMR (126 MHz, C<sub>6</sub>D<sub>6</sub>): δ = 153.6, 153.1, 152.5, 151.6, 134.8, 131.8, 131.5, 129.7, 128.5, 128.0, 127.6, 127.4, 127.0, 124.2, 124.1, 121.9, 118.6, 117.3, 103.3, 97.5, 87.3, 48.6, 34.0, 29.6, 24.8, 23.2 ppm.

HRMS (ESI/Q-TOF) m/z: [M+Na]<sup>+</sup> calcd for C<sub>33</sub>H<sub>39</sub>NNaO<sub>4</sub>S 568.2492; Found 568.2486.

IR (neat): ν = 2959, 2929, 2869, 1737, 1662, 1600, 1461, 1369, 1311, 1225, 1154, 1045, 941 cm<sup>-1</sup>

R<sub>f</sub>: 0.50 (Petroleum ether / Ethyl acetate 8:1 v/v, UV)

**Compound 6o**: (Z)-N-benzyl-N,N-dimethyl-γ<sup>2</sup>-azanesulfonamide-N-(6-methylene-4H,6H-benzo[b][1,5]dioxocin-4-yl)benzenesulfonamide

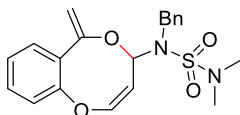

$C_{20}H_{22}N_2O_4S$   
MW: 386.47 g.mol<sup>-1</sup>  
White solid  
mp: 43-45°C

61% (47 mg, 0.12 mmol)

<sup>1</sup>H NMR (500 MHz, C<sub>6</sub>D<sub>6</sub>): δ = 7.38 (d, *J* = 14.2 Hz, 1H), 7.26 – 7.23 (m, 1H), 7.19 (d, *J* = 7.4 Hz, 2H), 7.04 (t, *J* = 7.4 Hz, 2H), 6.98 (t, *J* = 7.4 Hz, 1H), 6.85 (t, *J* = 7.6 Hz, 1H), 6.77 (d, *J* = 8.2 Hz, 1H), 6.66 (t, *J* = 7.6 Hz, 1H), 5.05 (d, *J* = 6.0 Hz, 1H), 4.95 (dd, *J* = 14.3, 5.8 Hz, 1H), 4.66 (dd, *J* = 40.7, 1.9 Hz, 2H), 4.37 (d, *J* = 5.4 Hz, 2H), 2.20 (s, 6H) ppm.

<sup>13</sup>C NMR (126 MHz, C<sub>6</sub>D<sub>6</sub>) δ = 153.2, 152.6, 135.6, 134.0, 129.8, 128.6, 128.0, 127.6, 127.37, 126.80, 124.2, 122.0, 118.6, 117.3, 102.5, 97.8, 87.3, 50.0, 37.2 ppm.

HRMS (ESI/Q-TOF) m/z: [M+Na]<sup>+</sup> calcd for C<sub>20</sub>H<sub>22</sub>N<sub>2</sub>NaO<sub>4</sub>S 409.1192; Found 409.1204.

IR (neat): ν = 3048, 3068, 3028, 2951, 2139, 1679, 1351, 1246, 1020, 840 cm<sup>-1</sup>

R<sub>f</sub>: 0.50 (Petroleum ether / Ethyl acetate 4:1 v/v, UV)

**Compound 6p**: (Z)-1-(6-methylene-4H,6H-benzo[b][1,5]dioxocin-4-yl)-1,3-dihydrobenzo[c]isothiazole 2,2-dioxide

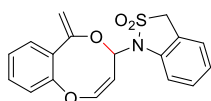

$C_{18}H_{15}NO_4S$   
MW: 341.38 g. mol<sup>-1</sup>

Colorless liquid

73% (50 mg, 0.15 mmol)

**<sup>1</sup>H NMR (300 MHz, C<sub>6</sub>D<sub>6</sub>)**  $\delta$  = 7.38 – 7.26 (m, 2H), 7.09 (s, 1H), 6.99 – 6.88 (m, 2H), 6.82 – 6.65 (m, 3H), 6.32 (d,  $J$  = 7.7 Hz, 1H), 5.14 (dd,  $J$  = 6.6, 0.5 Hz, 1H), 4.91 (dd,  $J$  = 14.0, 6.6 Hz, 1H), 4.78 (dd,  $J$  = 18.5, 2.0 Hz, 2H), 3.35 (s, 2H) ppm.

**<sup>13</sup>C NMR (126 MHz, C<sub>6</sub>D<sub>6</sub>)**:  $\delta$  = 153.3, 152.7, 134.6, 132.0, 131.6, 129.9, 128.7, 128.0, 124.3, 124.2, 122.2, 121.0, 118.6, 117.4, 104.4, 97.9, 87.5, 46.3 ppm.

**HRMS (ESI/Q-TOF) m/z**: [M+Na]<sup>+</sup> calcd for C<sub>18</sub>H<sub>15</sub>NNaO<sub>4</sub>S 364.0614; Found 364.0593.

**IR (neat)**:  $\nu$  = 2984, 1735, 1615, 1372, 1235, 1168, 1043, 936 cm<sup>-1</sup>

**R<sub>f</sub>**: 0.50 (Petroleum ether / Ethyl acetate 3:1 v/v, UV)

**Compound 8a** : (Z)-1-(8-chloro-6-methylene-4H,6H-benzo[b][1,5]dioxocin-4-yl)-1,3-dihydrobenzo[c]isothiazole 2,2-dioxide

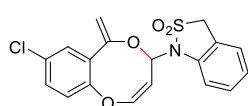

C<sub>18</sub>H<sub>14</sub>ClNO<sub>4</sub>S

MW: 375.82 g. mol<sup>-1</sup>

Colorless liquid

81% (61 mg, 0.16 mmol)

**<sup>1</sup>H NMR (500 MHz, C<sub>6</sub>D<sub>6</sub>)**  $\delta$  = 7.44 (d,  $J$  = 2.4 Hz, 1H), 7.28 (d,  $J$  = 7.8 Hz, 1H), 7.09 (d,  $J$  = 14.0 Hz, 1H), 6.89 (dd,  $J$  = 8.7, 2.4 Hz, 1H), 6.79 (t,  $J$  = 7.6 Hz, 1H), 6.68 (t,  $J$  = 7.6 Hz, 1H), 6.60 (d,  $J$  = 8.7 Hz, 1H), 6.30 (d,  $J$  = 7.7 Hz, 1H), 4.97 (d,  $J$  = 6.6 Hz, 1H), 4.84 (dd,  $J$  = 14.0, 6.6 Hz, 1H), 4.61 (dd,  $J$  = 40.7, 2.4 Hz, 2H), 3.32 (s, 2H) ppm.

**<sup>13</sup>C NMR (126 MHz, C<sub>6</sub>D<sub>6</sub>)**:  $\delta$  = 151.6, 151.4, 134.5, 132.1, 131.5, 129.9, 128.7, 128.2, 128.0, 124.2, 123.9, 121.0, 119.8, 118.9, 103.8, 98.0, 89.0, 46.2 ppm.

**HRMS (ESI/Q-TOF) m/z**: [M+Na]<sup>+</sup> calcd for C<sub>18</sub>H<sub>14</sub>ClNNaO<sub>4</sub>S 398.0224; Found 398.0230.

**IR (neat)**:  $\nu$  = 2927, 2853, 1672, 1625, 1474, 1405, 1314, 1270, 1234, 1174, 971 cm<sup>-1</sup>

**R<sub>f</sub>**: 0.50 (Petroleum ether / Ethyl acetate 3:1 v/v, UV)



**Compound 8b** : (Z)-1-(8-methyl-6-methylene-4H,6H-benzo[b][1,5]dioxocin-4-yl)-1,3-dihydrobenzo[c]isothiazole 2,2-dioxide

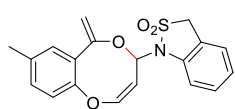

$C_{19}H_{17}NO_4S$   
MW: 355.41 g. mol<sup>-1</sup>  
Colorless liquid

72% (51 mg, 0.14 mmol)

<sup>1</sup>H NMR (500 MHz, C<sub>6</sub>D<sub>6</sub>): δ = 7.29 (dd, *J* = 14.6, 6.8 Hz, 2H), 7.13 (d, *J* = 14.2 Hz, 1H), 6.88 (d, *J* = 8.3 Hz, 1H), 6.80 – 6.76 (m, 2H), 6.67 (t, *J* = 7.3 Hz, 1H), 6.29 (d, *J* = 7.7 Hz, 1H), 5.19 (dd, *J* = 6.6, 0.5 Hz, 1H), 4.94 (dd, *J* = 14.0, 6.6 Hz, 1H), 4.81 (dd, *J* = 31.8, 1.9 Hz, 2H), 3.33 (s, 2H), 2.03 (s, 3H) ppm.

<sup>13</sup>C NMR (126 MHz, C<sub>6</sub>D<sub>6</sub>): δ = 152.9, 151.3, 134.6, 132.0, 131.7, 131.3, 130.9, 128.7, 128.0, 124.4, 124.1, 121.0, 118.3, 117.3, 104.6, 97.9, 87.2, 46.3, 20.4 ppm

HRMS (ESI/Q-TOF) m/z: [M+Na]<sup>+</sup> calcd for C<sub>19</sub>H<sub>17</sub>NNaO<sub>4</sub>S 378.0770; Found 378.0775.

IR (neat): ν = 2928, 2363, 2323, 2045, 1979, 1671, 1623, 1456, 1326, 1177, 775 cm<sup>-1</sup>

R<sub>f</sub>: 0.50 (Petroleum ether / Ethyl acetate 3:1 v/v, UV)

**Compound 8c** : (Z)-1-(8-fluoro-6-methylene-4H,6H-benzo[b][1,5]dioxocin-4-yl)-1,3-dihydrobenzo[c]isothiazole 2,2-dioxide

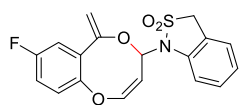

$C_{18}H_{14}FNO_4S$   
MW: 359.37 g. mol<sup>-1</sup>  
Colorless liquid

69% (50 mg, 0.14 mmol)

<sup>1</sup>H NMR (500 MHz, C<sub>6</sub>D<sub>6</sub>): δ = 7.29 (d, *J* = 7.8 Hz, 1H), 7.10 (d, *J* = 14.0 Hz, 1H), 7.06 (dd, *J* = 9.0, 2.7 Hz, 1H), 6.80 - 6.77 (m, 1H), 6.70 – 6.60 (m, 3H), 6.30 (d, *J* = 7.7 Hz, 1H), 4.99 (d, *J* = 6.7 Hz, 1H), 4.87 (dd, *J* = 14.0, 6.7 Hz, 1H), 4.63 (dd, *J* = 47.2, 2.3 Hz, 2H), 3.32 (s, 2H) ppm.

<sup>13</sup>C NMR (126 MHz, C<sub>6</sub>D<sub>6</sub>): δ = 158.9, 157.0, 151.7, 149.3, 134.50, 132.1, 131.6, 128.7, 128.2, 128.0, 124.1, 121.0, 119.5, 119.4, 118.8, 118.7, 117.1, 116.9, 110.3, 110.1, 104.0, 98.1, 88.8, 46.2 ppm.

<sup>19</sup>F NMR (282 MHz, C<sub>6</sub>D<sub>6</sub>) δ = -120.35 (s) ppm.

HRMS (ESI/Q-TOF) m/z: [M+Na]<sup>+</sup> calcd for C<sub>18</sub>H<sub>14</sub>FNNaO<sub>4</sub>S 382.0520; Found 382.0530.

IR (neat): ν = 2916, 2902, 2856, 1671, 1484, 1312, 1279, 1173, 1131, 1046, 980 cm<sup>-1</sup>

R<sub>f</sub>: 0.50 (Petroleum ether / Ethyl acetate 3:1 v/v, UV)

**Compound 8d:** (Z)-N-benzyl-N-(8-fluoro-6-methylene-4H,6H-benzo[b][1,5]dioxocin-4-yl)-4-methylbenzenesulfonamide

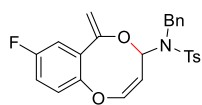

$C_{25}H_{22}FNO_4S$   
MW: 451.51 g. mol<sup>-1</sup>  
Colorless liquid  
70% (63 mg, 0.14 mmol)

**<sup>1</sup>H NMR (500 MHz, C<sub>6</sub>D<sub>6</sub>):**  $\delta$  = 7.63 – 7.57 (m, 1H), 7.57 (d,  $J$  = 8.3 Hz, 2H), 7.14 (d,  $J$  = 10.7 Hz, 2H), 7.03 – 6.99 (m, 2H), 6.98 – 6.92 (m, 2H), 6.66 (d,  $J$  = 8.0 Hz, 2H), 6.51 – 6.46 (m, 2H), 4.94 – 4.88 (m, 2H), 4.49 (dd,  $J$  = 25.5, 2.2 Hz, 2H), 4.25 (q,  $J$  = 16.2 Hz, 2H), 1.84 (s, 3H) ppm.

**<sup>13</sup>C NMR (126 MHz, C<sub>6</sub>D<sub>6</sub>):**  $\delta$  = 158.7, 156.8, 151.5, 151.4, 149.0, 143.5, 136.4, 134.9, 132.6, 129.67, 128.6, 128.0, 127.0, 126.9, 119.4, 119.3, 118.7, 118.6, 117.0, 116.8, 110.1, 109.9, 104.7, 97.6, 88.8, 49.3, 20.8 ppm.

**<sup>19</sup>F NMR (282 MHz, CDCl<sub>3</sub>)**  $\delta$  = -122.22 (s) ppm.

**HRMS (ESI/Q-TOF) m/z:** [M+Na]<sup>+</sup> calcd for C<sub>25</sub>H<sub>22</sub>FNNaO<sub>4</sub>S 474.1146; Found 474.1117.

**IR (neat):**  $\nu$  = 3034, 2924, 1738, 1662, 1484, 1443, 1358, 1271, 1161, 1088, 1042, 940, 663 cm<sup>-1</sup>

**R<sub>f</sub>:** 0.50 (Petroleum ether / Ethyl acetate 5:1 v/v, UV)

**Compound 8e:** (Z)-N-benzyl-4-methyl-N-(8-methyl-6-methylene-4H,6H-benzo[b][1,5]dioxocin-4-yl)benzenesulfonamide

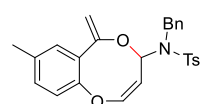

$C_{26}H_{25}NO_4S$   
MW: 447.55 g. mol<sup>-1</sup>  
Colourless liquid  
67% (60 mg, 0.13 mmol)

**<sup>1</sup>H NMR (300 MHz, C<sub>6</sub>D<sub>6</sub>)**  $\delta$  = 7.65 (d,  $J$  = 24.5 Hz, 1H), 7.57 (d,  $J$  = 12.5 Hz, 1H), 7.17 – 7.15 (m, 4H), 7.05 – 6.95 (m, 3H), 6.72 – 6.64 (m, 4H), 5.15 (dd,  $J$  = 5.5, 0.8 Hz, 1H), 4.97 (dd,  $J$  = 14.3, 5.5 Hz, 1H), 4.66 (dd,  $J$  = 30.3, 1.9 Hz, 2H), 4.32 – 4.21 (m, 2H), 1.95 (s, 3H), 1.83 (s, 3H) ppm.

**<sup>13</sup>C NMR (126 MHz, C<sub>6</sub>D<sub>6</sub>)**  $\delta$  = 152.7, 151.1, 143.4, 136.4, 135.0, 132.5, 131.2, 130.8, 129.7, 128.6, 126.9, 124.3, 118.3, 117.2, 105.3, 97.5, 87.2, 49.4, 20.8, 20.4 ppm.

**HRMS (ESI/Q-TOF) m/z:** [M+K]<sup>+</sup> calcd for C<sub>26</sub>H<sub>25</sub>KNO<sub>4</sub>S 486.1136; Found 486.1142.

**IR (neat):**  $\nu$  = 2948, 2826, 1620, 1420, 1401, 1351, 1246, 1160, 1024, 990, 882 cm<sup>-1</sup>

**R<sub>f</sub>:** 0.50 (Petroleum ether / Ethyl acetate 5:1 v/v, UV)

**Compound 8f:** (Z)-N-benzyl-N-(8-chloro-6-methylene-4H,6H-benzo[b][1,5]dioxocin-4-yl)-4-methylbenzenesulfonamide

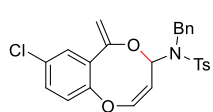

C<sub>25</sub>H<sub>22</sub>ClNO<sub>4</sub>S

MW: 467.96 g. mol<sup>-1</sup>

Colorless liquid

66% (62 mg, 0.13 mmol)

**<sup>1</sup>H NMR (500 MHz, C<sub>6</sub>D<sub>6</sub>):** δ = 7.59 (d, *J* = 14.2 Hz, 1H), 7.56 (d, *J* = 8.3 Hz, 2H), 7.30 (d, *J* = 2.4 Hz, 1H), 7.13 (d, *J* = 7.1 Hz, 2H), 7.04 – 6.93 (m, 3H), 6.76 (dd, *J* = 8.8, 2.4 Hz, 1H), 6.66 (d, *J* = 8.0 Hz, 2H), 6.43 (d, *J* = 8.8 Hz, 1H), 4.92 (d, *J* = 5.5 Hz, 1H), 4.86 (dd, *J* = 14.2, 5.5 Hz, 1H), 4.47 (dd, *J* = 23.1, 2.3 Hz, 2H), 4.24 (q, *J* = 16.2 Hz, 2H), 1.84 (s, 3H) ppm.

**<sup>13</sup>C NMR (126 MHz, C<sub>6</sub>D<sub>6</sub>):** δ = 151.3, 151.0, 143.5, 136.4, 134.9, 132.7, 129.7, 129.7, 128.6, 128.0, 127.8, 127.6, 127.2, 126.9, 126.8, 123.8, 119.8, 118.8, 104.5, 97.5, 89.0, 49.3, 20.8 ppm.

**HRMS (ESI/Q-TOF) m/z:** [M+Na]<sup>+</sup> calcd for C<sub>25</sub>H<sub>22</sub>ClNNaO<sub>4</sub>S 490.2850; Found 490.0900.

**IR (neat):** ν = 3048, 2968, 1728, 1651, 1539, 1479, 1351, 1246, 1220, 1128, 1040, 778cm<sup>-1</sup>

**R<sub>f</sub>:** 0.50 (Petroleum ether / Ethyl acetate 5:1 v/v, UV)

**Compound 8g:** 1-((2Z,6Z)-6-ethylidene-4H,6H-benzo[b][1,5]dioxocin-4-yl)-1,3-dihydrobenzo[c]isothiazole 2,2-dioxide

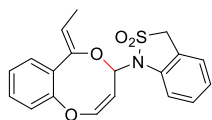

C<sub>19</sub>H<sub>17</sub>NO<sub>4</sub>S

MW: 355.41 g. mol<sup>-1</sup>

Colorless liquid

75% (53 mg, 0.15 mmol)

**<sup>1</sup>H NMR (500 MHz, C<sub>6</sub>D<sub>6</sub>):** δ = 7.34 – 7.29 (m, 2H), 7.13 (d, *J* = 14.2 Hz, 1H), 6.97 – 6.94 (m, 2H), 6.81 – 7.78 (m, 2H), 6.68 (t, *J* = 7.6 Hz, 1H), 6.31 (d, *J* = 7.7 Hz, 1H), 5.23 (q, *J* = 7.0 Hz, 1H), 5.17 (d, *J* = 6.6 Hz, 1H), 4.96 (dd, *J* = 14.0, 6.6 Hz, 1H), 3.38 – 3.24 (m, 2H), 1.85 (d, *J* = 7.0 Hz, 3H) ppm.

**<sup>13</sup>C NMR (126 MHz, C<sub>6</sub>D<sub>6</sub>)** δ = 152.6, 146.3, 134.6, 132.0, 131.7, 128.7, 128.6, 128.0, 124.1, 123.0, 122.1, 121.0, 119.6, 117.5, 104.8, 98.5, 97.8, 46.2, 9.9 ppm

**HRMS (ESI/Q-TOF) m/z:** [M+Na]<sup>+</sup> calcd for C<sub>19</sub>H<sub>17</sub>NNaO<sub>4</sub>S 378.0770; Found 378.0767.

**IR (neat):** ν = 2919, 2858, 1732, 1664, 1462, 1309, 1268, 1224, 1173, 1129, 1053, 755 cm<sup>-1</sup>

**R<sub>f</sub>:** 0.50 (Petroleum ether / Ethyl acetate 4:1 v/v, UV)

**Compound 8h:** *N*-benzyl-*N*-((2*Z*,6*Z*)-6-ethylidene-4*H*,6*H*-benzo[*b*][1,5]dioxocin-4-yl)-4-methylbenzenesulfonamide

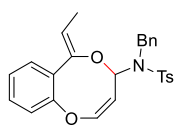

$C_{26}H_{25}NO_4S$   
MW: 447.55 g. mol<sup>-1</sup>  
Colorless liquid  
69% (63 mg, 0.14 mmol)

**<sup>1</sup>H NMR (300 MHz, C<sub>6</sub>D<sub>6</sub>)**  $\delta$  = 7.65 - 5.57 (m, 3H), 7.23 (dd, *J* = 7.9, 1.4 Hz, 1H), 7.16 - 7.13 (m, 2H), 7.06 - 6.96 (m, 3H), 6.88 - 6.82 (m, 1H), 6.79 - 6.75 (m, 1H), 6.74 - 6.67 (m, 3H), 5.17 - 5.08 (m, 2H), 4.95 (dd, *J* = 14.3, 5.3 Hz, 1H), 4.36 - 4.16 (m, 2H), 1.87 (s, 3H), 1.71 (d, *J* = 7.0 Hz, 3H) ppm.

**<sup>13</sup>C NMR (126 MHz, C<sub>6</sub>D<sub>6</sub>)**  $\delta$  = 152.2, 145.9, 143.6, 136.3, 135.0, 132.2, 129.7, 128.5, 127.4, 127.0, 126.9, 122.9, 122.0, 119.5, 117.3, 105.5, 98.6, 97.0, 49.2, 20.8, 9.8 ppm.

**HRMS (ESI/Q-TOF) m/z:** [M+K]<sup>+</sup> calcd for C<sub>26</sub>H<sub>25</sub>KNO<sub>4</sub>S 486.1136; Found 486.1166.

**IR (neat):**  $\nu$  = 3062, 2917, 1660, 1613, 1455, 1357, 1305, 1222, 1162, 1088, 733 cm<sup>-1</sup>

**R<sub>f</sub>:** 0.50 (Petroleum ether / Ethyl acetate 5:1 v/v, UV)

**Compound 8i:** (*Z*)-*N*-benzyl-4-methyl-*N*-(6-methylene-4*H*,6*H*-benzo[*b*][1,5]dioxocin-4-yl)benzenesulfonamide

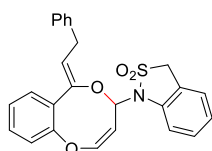

$C_{25}H_{21}NO_4S$   
MW: 431.51 g. mol<sup>-1</sup>  
Colorless liquid  
61% (53 mg, 0.12 mmol)

**<sup>1</sup>H NMR (500 MHz, C<sub>6</sub>D<sub>6</sub>)**  $\delta$  = 7.30 (t, *J* = 7.1 Hz, 3H), 7.26 (d, *J* = 7.9 Hz, 1H), 7.21 (t, *J* = 7.7 Hz, 2H), 7.12 - 7.08 (m, 2H), 6.95 (d, *J* = 4.3 Hz, 2H), 6.79 (t, *J* = 7.1 Hz, 1H), 6.75 (dd, *J* = 8.4, 3.8 Hz, 1H), 6.68 (t, *J* = 7.6 Hz, 1H), 6.32 (d, *J* = 7.7 Hz, 1H), 5.45 (t, *J* = 7.6 Hz, 1H), 5.15 (d, *J* = 6.7 Hz, 1H), 4.95 (dd, *J* = 14.0, 6.7 Hz, 1H), 3.83 - 3.78 (m, 1H), 3.70 - 3.65 (m, 1H), 3.32 (s, 2H) ppm.

**<sup>13</sup>C NMR (126 MHz, C<sub>6</sub>D<sub>6</sub>):**  $\delta$  = 152.9, 146.1, 141.3, 134.6, 132.1, 131.7, 129.0, 128.7, 128.6, 128.5, 128.0, 127.8, 127.6, 126.0, 124.1, 123.3, 122.2, 121.0, 119.2, 117.4, 104.6, 103.0, 97.9, 46.3, 30.9 ppm.

**HRMS (ESI/Q-TOF) m/z:** [M+Na]<sup>+</sup> calcd for C<sub>25</sub>H<sub>21</sub>NNaO<sub>4</sub>S 454.1083; Found 454.1090.

**IR (neat):**  $\nu$  = 3028, 2926, 1621, 1453, 1324, 1176, 1128, 1031, 755, 701 cm<sup>-1</sup>

**R<sub>f</sub>:** 0.50 (Petroleum ether / Ethyl acetate 4:1 v/v, UV)

**Compound 5a:** *N*-(3-(2-acetylphenoxy)prop-1-yn-1-yl)-*N*,4-dimethylbenzenesulfonamide

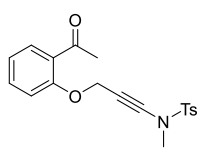

$C_{19}H_{19}NO_4S$   
MW: 357.10 g. mol<sup>-1</sup>  
Colorless gum  
64%

**<sup>1</sup>H NMR (500 MHz, CDCl<sub>3</sub>)**  $\delta$  = 7.78 – 7.76 (m, 1H), 7.63 (d,  $J$  = 8.3 Hz, 2H), 7.55 – 7.47 (m, 1H), 7.23 (d,  $J$  = 8.0 Hz, 2H), 7.09 - 7.06 m, 2H), 4.95 (s, 2H), 3.04 (s, 3H), 2.59 (s, 3H), 2.42 (s, 3H) ppm.

**<sup>13</sup>C NMR (126 MHz, CDCl<sub>3</sub>)**  $\delta$  = 199.8, 156.7, 145.0, 133.5, 133.0, 130.5, 129.8, 128.9, 127.6, 121.2, 113.2, 82.9, 64.5, 56.5, 38.9, 32.0, 21.7 ppm

**HRMS (ESI/Q-TOF) m/z:** [M+ k]<sup>+</sup> calcd for C<sub>19</sub>H<sub>19</sub>KNO<sub>4</sub>S 396.0666; Found 396.0664

**IR (neat):**  $\nu$  = 3002, 2929, 2242, 1666, 1596, 1481, 1451, 1356, 1293, 1266, 1161, 1028, 760 cm<sup>-1</sup>

**R<sub>f</sub>:** 0.41 (Petroleum ether / Ethyl acetate 4:1 v/v, UV)

**Compound 5c:** *N*-(3-(2-acetylphenoxy)prop-1-yn-1-yl)-*N*-cyclopropyl-4-methylbenzenesulfonamide

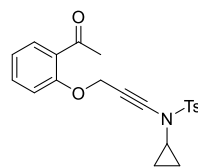

$C_{21}H_{21}NO_4S$   
MW: 383.46 g. mol<sup>-1</sup>  
Colorless gum  
70%

**<sup>1</sup>H NMR (500 MHz, CDCl<sub>3</sub>)**  $\delta$  = 7.73 (dd,  $J$  = 7.7, 1.8 Hz, 1H), 7.64 (d,  $J$  = 8.3 Hz, 2H), 7.49 – 7.44 (m, 1H), 7.21 (d,  $J$  = 8.1 Hz, 2H), 7.07 – 7.00 (m, 2H), 4.93 (s, 2H), 2.71 – 2.65 (m, 1H), 2.57 (s, 3H), 2.39 (s, 3H), 0.77 – 0.68 (m, 4H) ppm.

**<sup>13</sup>C NMR (126 MHz, CDCl<sub>3</sub>)**  $\delta$  = 199.7, 156.7, 145.0, 133.5, 130.4, 129.8, 127.7, 121.2, 113.4, 81.0, 65.9, 56.5, 32.6, 32.0, 21.6, 6.5 ppm.

**HRMS (ESI/Q-TOF) m/z:** [M+Na]<sup>+</sup> calcd for C<sub>21</sub>H<sub>21</sub>NNaO<sub>4</sub>S 406.1083; Found 406.1067.

**IR (neat):**  $\nu$  = 3100, 2950, 2263, 1672, 1490, 1479, 1419, 1298, 1220, 1170, 1020, 870, 806 cm<sup>-1</sup>

**R<sub>f</sub>:** 0.41 (Petroleum ether / Ethyl acetate 4:1 v/v, UV)

**Compound 5f:** *N*-(3-(2-acetylphenoxy)prop-1-yn-1-yl)-*N*-benzyl-4-methylbenzenesulfonamide

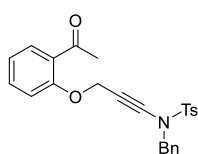

C<sub>25</sub>H<sub>23</sub>NO<sub>4</sub>S  
MW: 433.52 g. mol<sup>-1</sup>  
Colorless gum  
87%

Colorless gum

<sup>1</sup>H NMR (500 MHz, CDCl<sub>3</sub>) δ = 7.78 – 7.76 (m, 1H), 7.62 (d, *J* = 8.4 Hz, 2H), 7.46 – 7.42 (m, 2H), 7.34 – 7.26 (m, 3H), 7.22 (t, *J* = 7.0 Hz, 4H), 7.06 (t, *J* = 7.2 Hz, 1H), 6.92 (d, *J* = 8.4 Hz, 1H), 4.87 (s, 2H), 4.48 (s, 2H), 2.55 (s, 3H), 2.43 (s, 3H) ppm.

<sup>13</sup>C NMR (126 MHz, CDCl<sub>3</sub>) δ = 199.8, 156.7, 144.9, 134.4, 134.1, 133.5, 130.4, 129.8, 128.9, 128.6, 128.57, 128.4, 127.5, 121.2, 113.2, 81.4, 66.7, 56.4, 55.3, 32.0, 21.7 ppm.

HRMS (ESI/Q-TOF) *m/z*: [M+Na]<sup>+</sup> calcd for C<sub>25</sub>H<sub>23</sub>NNaO<sub>4</sub>S 456.1240; Found 456.1234

IR (neat): ν = 2999, 2929, 2234, 1670, 1595, 1478, 1453, 1357, 1290, 1162, 996, 757 cm<sup>-1</sup>

R<sub>f</sub>: 0.41 (Petroleum ether / Ethyl acetate 5:1 v/v, UV)

**Compound 5h:** (*R*)-*N*-(3-(2-acetylphenoxy)prop-1-yn-1-yl)-4-methyl-*N*-(1-phenylethyl)benzenesulfonamide

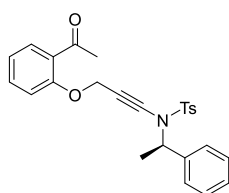

C<sub>26</sub>H<sub>25</sub>NO<sub>4</sub>S  
MW: 447.55 g. mol<sup>-1</sup>  
Colorless gum  
70%

<sup>1</sup>H NMR (500 MHz, CDCl<sub>3</sub>) δ = 7.78 – 7.77 (m, 1H), 7.63 (d, *J* = 8.2 Hz, 1H), 7.49 (d, *J* = 8.3 Hz, 2H), 7.45 (t, *J* = 9.0 Hz, 1H), 7.20 – 7.15 (m, 5H), 7.11 – 7.09 (m, 1H), 7.06 – 7.01 (m, 2H), 5.11 (q, *J* = 7.0 Hz, 1H), 4.97 (s, 2H), 2.56 (s, 3H), 2.37 (s, 3H), 1.45 (d, *J* = 7.0 Hz, 3H) ppm.

<sup>13</sup>C NMR (126 MHz, CDCl<sub>3</sub>) δ = 199.8, 156.8, 144.6, 139.4, 135.1, 133.5, 130.4, 129.5, 129.4, 128.9, 128.5, 128.4, 128.0, 127.4, 127.1, 126.7, 126.1, 121.2, 113.3, 79.3, 68.8, 58.7, 56.6, 32.0, 21.6, 19.5 ppm.

HRMS (ESI/Q-TOF) *m/z*: [M+K]<sup>+</sup> calcd for C<sub>26</sub>H<sub>25</sub>NNaO<sub>4</sub>S 470.1396; Found 470.1392.

IR (neat): ν = 3030, 2970, 2233, 1542, 1460, 1470, 1400, 1270, 1220, 1169, 975, 850, 772 cm<sup>-1</sup>

R<sub>f</sub>: 0.41 (Petroleum ether / Ethyl acetate 4:1 v/v, UV)

**Compound 5i**: *N*-(3-(2-acetylphenoxy)prop-1-yn-1-yl)-*N*-(benzo[d][1,3]dioxol-5-ylmethyl)-4-methylbenzenesulfonamide

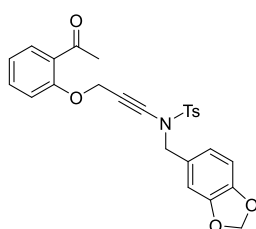

$C_{26}H_{23}NO_6S$   
MW: 477.53 g. mol<sup>-1</sup>  
Colorless gum  
73%

<sup>1</sup>H NMR (500 MHz, CDCl<sub>3</sub>)  $\delta$  = 7.78 – 7.75 (m, 1H), 7.63 (d, *J* = 8.3 Hz, 2H), 7.48 – 7.45 (m, 1H), 7.22 (d, *J* = 8.0 Hz, 2H), 7.06 (t, *J* = 7.9 Hz, 1H), 6.95 (d, *J* = 8.3 Hz, 1H), 6.72 – 6.67 (m, 3H), 5.97 (s, 2H), 4.89 (s, 2H), 4.37 (s, 2H), 2.56 (s, 3H), 2.44 (s, 3H) ppm.

<sup>13</sup>C NMR (126 MHz, CDCl<sub>3</sub>)  $\delta$  = 199.8, 156.7, 147.8, 147.8, 144.9, 134.5, 133.5, 130.5, 129.8, 128.9, 127.7, 127.5, 122.6, 121.2, 113.6, 109.0, 108.1, 101.2, 66.9, 56.5, 55.2, 32.0, 21.7 ppm

HRMS (ESI/Q-TOF) *m/z*: [M+K]<sup>+</sup> calcd for C<sub>26</sub>H<sub>23</sub>KNO<sub>6</sub>S 516.0878; Found 516.0879.

IR (neat):  $\nu$  = 2991, 2921, 2246, 1678, 1596, 1496, 1442, 1367, 1292, 1167, 998, 767 cm<sup>-1</sup>

R<sub>f</sub>: 0.5 (Petroleum ether / Ethyl acetate 2:1 v/v, UV)

**Compound 5l**: *N*-(3-(2-acetylphenoxy)prop-1-yn-1-yl)-*N*-benzyl-4-methylbenzenesulfonamide

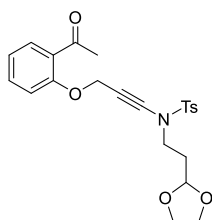

$C_{23}H_{25}NO_6S$   
MW: 433.52 g. mol<sup>-1</sup>  
Colorless gum  
65%

<sup>1</sup>H NMR (500 MHz, CDCl<sub>3</sub>)  $\delta$  = 7.78 – 7.76 (m, 1H), 7.64 (d, *J* = 8.3 Hz, 2H), 7.54 – 7.47 (m, 1H), 7.22 (d, *J* = 8.0 Hz, 2H), 7.10 – 7.04 (m, 2H), 4.97 (s, 2H), 4.86 (t, *J* = 4.4 Hz, 1H), 3.95 – 3.92 (m, 2H), 3.85 – 3.81 (m, 2H), 3.51 – 3.38 (m, 2H), 2.60 (s, 3H), 2.42 (s, 3H), 1.99 – 1.92 (m, 2H) ppm.

<sup>13</sup>C NMR (126 MHz, CDCl<sub>3</sub>)  $\delta$  = 199.8, 156.7, 144.9, 134.2, 133.5, 130.48, 129.8, 128.9, 127.4, 121.2, 113.2, 101.6, 81.1, 66.4, 65.0, 56.5, 46.6, 32.0, 21.7 ppm

HRMS (ESI/Q-TOF) *m/z*: [M+Na]<sup>+</sup> calcd for C<sub>23</sub>H<sub>25</sub>NNaO<sub>6</sub>S 466.1294; Found 466.1287.

IR (neat):  $\nu$  = 2954, 2886, 1672, 1595, 1485, 1450, 1293, 1163, 760 cm<sup>-1</sup>

R<sub>f</sub>: 0.41 (Petroleum ether / Ethyl acetate 3:1 v/v, UV)

**Compound 5m**: *N*-(3-(2-acetylphenoxy)prop-1-yn-1-yl)-*N*-benzylmethanesulfonamide

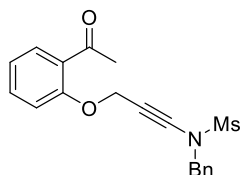

$C_{19}H_{19}NO_4S$

MW: 357.42 g. mol<sup>-1</sup>

Colorless gum

68%

<sup>1</sup>H NMR (300 MHz, CDCl<sub>3</sub>) δ = 7.76 (dd, *J* = 7.7, 1.8 Hz, 1H), 7.49 – 7.45 (m, 1H), 7.35 – 7.33 (m, 5H), 7.09 – 7.06 (m, 1H), 7.00 (d, *J* = 8.4 Hz, 1H), 4.95 (s, 2H), 4.61 (s, 2H), 2.80 (s, 3H), 2.62 (s, 3H) ppm.

<sup>13</sup>C NMR (126 MHz, CDCl<sub>3</sub>) δ = 200.0, 156.8, 134.3, 133.6, 130.7, 129.5, 129.1, 129.0, 128.9, 121.7, 113.7, 81.4, 67.5, 57.0, 55.7, 39.3, 32.2 ppm

HRMS (ESI/Q-TOF) *m/z*: [M+Na]<sup>+</sup> calcd for C<sub>19</sub>H<sub>19</sub>NNaO<sub>4</sub>S 380.0927; Found 380.0941

IR (neat): ν = 3032, 2929, 2244, 1670, 1598, 1481, 1452, 1354, 1291, 1213, 1160, 956, 826, 757 cm<sup>-1</sup>

R<sub>f</sub>: 0.5 (Petroleum ether / Ethyl acetate 3:1 v/v, UV)

**Compound 5n:** *N*-(3-(2-acetylphenoxy)prop-1-yn-1-yl)-*N*-benzyl-2,4,6-triisopropylbenzenesulfonamide

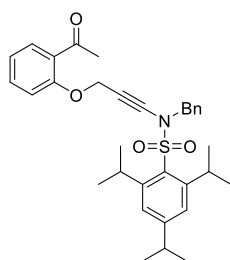

C<sub>33</sub>H<sub>39</sub>NO<sub>4</sub>S

MW: 545.26 g. mol<sup>-1</sup>

Colorless gum

74%

<sup>1</sup>H NMR (300 MHz, CDCl<sub>3</sub>) δ = 7.71 (dd, *J* = 7.7, 1.8 Hz, 1H), 7.33 – 7.28 (m, 4H), 7.26 – 7.24 (m, 2H), 7.20 (s, 2H), 7.02 – 6.97 (m, 1H), 6.78 (d, *J* = 8.4, 1H), 4.80 (s, 2H), 4.57 (s, 2H), 4.17 – 4.01 (m, 2H), 2.99 – 2.90 (m, 1H), 2.46 (s, 3H), 1.29 (d, *J* = 6.9 Hz, 6H), 1.19 (d, *J* = 6.8 Hz, 12H) ppm.

<sup>13</sup>C NMR (126 MHz, CDCl<sub>3</sub>) δ = 199.7, 156.8, 154.3, 152.0, 134.3, 133.4, 130.4, 130.2, 128.9, 128.7, 128.6, 128.4, 124.1, 121.0, 113.0, 81.0, 68.6, 56.6, 53.4, 34.2, 31.9, 29.8, 24.7, 23.6 ppm

HRMS (ESI/Q-TOF) *m/z*: [M+Na]<sup>+</sup> calcd for C<sub>33</sub>H<sub>39</sub>NNaO<sub>4</sub>S 568.2492; Found 568.2200

IR (neat): ν = 2960, 2929, 2241, 1673, 1597, 1482, 1452, 1359, 1291, 1213, 1165, 994, 797 cm<sup>-1</sup>

R<sub>f</sub>: 0.5 (Petroleum ether / Ethyl acetate 6:1 v/v, UV)

**Compound 5o:** *N*-(3-(2-acetylphenoxy)prop-1-yn-1-yl)-*N*-benzyl-*N,N*-dimethyl-γ<sup>2</sup>-azanesulfonamide

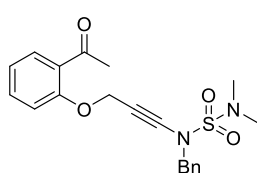

C<sub>20</sub>H<sub>22</sub>N<sub>2</sub>O<sub>4</sub>S

MW: 386.47 g. mol<sup>-1</sup>

Colorless gum

60%



**<sup>1</sup>H NMR (300 MHz, CDCl<sub>3</sub>)** δ = 7.74 (dd, *J* = 7.7, 1.8 Hz, 1H), 7.50 – 7.35 (m, 6H), 7.07 - 7.02 (m, 1H), 6.94 (d, *J* = 7.8 Hz, 1H), 4.90 (s, 2H), 4.57 (s, 2H), 2.81 (s, 6H), 2.60 (s, 3H) ppm.

**<sup>13</sup>C NMR (126 MHz, CDCl<sub>3</sub>)** δ = 199.9, 156.8, 135.1, 133.4, 130.4, 128.8, 128.7, 128.6, 128.5, 127.99, 127.96, 121.4, 113.5, 82.5, 66.3, 56.9, 56.5, 38.6, 38.0, 32.0 ppm

**HRMS (ESI/Q-TOF) m/z:** [M+Na]<sup>+</sup> calcd for C<sub>20</sub>H<sub>22</sub>N<sub>2</sub>NaO<sub>4</sub>S 409.1192; Found 409.1176.

**IR (neat):** ν = 3052, 2942, 2230, 1660, 1483, 1490, 1400, 1270, 1200, 1150, 997, 870, 706 cm<sup>-1</sup>

**R<sub>f</sub>:** 0.5 (Petroleum ether / Ethyl acetate 2:1 v/v, UV)

**Compound 5p:** 1-(2-((3-(2,2-dioxidobenzo[c]isothiazol-1(3H)-yl)prop-2-yn-1-yl)oxy)phenyl)ethan-1-one

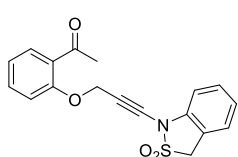

C<sub>18</sub>H<sub>15</sub>NO<sub>4</sub>S  
Colorless gum  
MW: 341.38 g. mol<sup>-1</sup>  
88%

**<sup>1</sup>H NMR (500 MHz, CDCl<sub>3</sub>)** δ = 7.84 (d, *J* = 7.9 Hz, 1H), 7.74 (dd, *J* = 7.7, 1.7 Hz, 1H), 7.69 (t, *J* = 7.6 Hz, 1H), 7.60 (t, *J* = 7.6 Hz, 1H), 7.53 – 7.47 (m, 1H), 7.42 (d, *J* = 7.8 Hz, 1H), 7.12 (d, *J* = 8.4 Hz, 1H), 7.05 (t, *J* = 7.9 Hz, 1H), 5.03 (s, 2H), 4.79 (s, 2H), 2.67 (s, 3H) ppm.

**<sup>13</sup>C NMR (126 MHz, CDCl<sub>3</sub>)** δ = 199.9, 156.8, 133.8, 133.5, 132.6, 131.4, 130.4, 129.8, 129.1, 124.7, 121.9, 121.4, 113.4, 76.9, 68.9, 56.9, 52.3, 32.0 ppm.

**HRMS (ESI/Q-TOF) m/z:** [M+Na]<sup>+</sup> calcd for C<sub>18</sub>H<sub>15</sub>NNaO<sub>4</sub>S 364.0614; Found 364.0606.

**IR (neat):** ν = 2924, 2824, 2244, 1673, 1493, 1327, 1217, 1179, 996 cm<sup>-1</sup>

**R<sub>f</sub>:** 0.5 (Petroleum ether / Ethyl acetate 1:1 v/v, UV)

**Compound 7a**: 1-(5-chloro-2-((3-(2,2-dioxidobenzo[c]isothiazol-1(3H)-yl)prop-2-yn-1-yl)oxy)phenyl)ethan-1-one

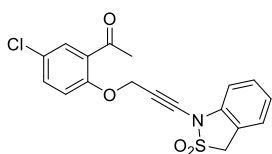

$C_{18}H_{14}ClNO_4S$   
Colorless gum  
MW: 375.82 g. mol<sup>-1</sup>  
86%

<sup>1</sup>H NMR (300 MHz, CDCl<sub>3</sub>)  $\delta$  = 7.85 (d,  $J$  = 7.8 Hz, 1H), 7.74 – 7.67 (m, 2H), 7.61 (t,  $J$  = 7.6 Hz, 1H), 7.48 – 7.41 (m, 2H), 7.09 (d,  $J$  = 8.9 Hz, 1H), 5.03 (s, 2H), 4.80 (s, 2H), 2.65 (s, 3H) ppm.

<sup>13</sup>C NMR (126 MHz, CDCl<sub>3</sub>):  $\delta$  = 198.4, 155.3, 133.9, 133.0, 132.5, 131.3, 130.1, 130.1, 129.9, 126.8, 124.7, 121.9, 115.0, 77.4, 68.5, 57.3, 52.3, 31.9 ppm.

HRMS (ESI/Q-TOF) m/z: [M+Na]<sup>+</sup> calcd for C<sub>18</sub>H<sub>14</sub>ClNNaO<sub>4</sub>S 398.0224; Found 398.0245.

IR (neat):  $\nu$  = 3028, 2970, 2359, 2243, 1738, 1681, 1593, 1480, 1365, 1217, 1169, 811 cm<sup>-1</sup>

R<sub>f</sub>: 0.5 (Petroleum ether / Ethyl acetate 2:1 v/v, UV)

**Compound 7b**: 1-(2-((3-(2,2-dioxidobenzo[c]isothiazol-1(3H)-yl)prop-2-yn-1-yl)oxy)-5-methylphenyl)ethan-1-one

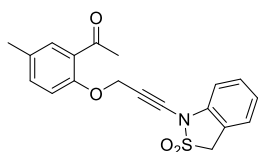

$C_{19}H_{17}NO_4S$   
MW: 355.41 g. mol<sup>-1</sup>  
Colorless gum  
84%

<sup>1</sup>H NMR (300 MHz, CDCl<sub>3</sub>)  $\delta$  = 7.81 (d,  $J$  = 7.8 Hz, 1H), 7.70 – 7.65 (m, 1H), 7.58 (t,  $J$  = 8.0 Hz, 1H), 7.52 (d,  $J$  = 2.6 Hz, 1H), 7.41 (d,  $J$  = 6.9 Hz, 1H), 7.30 – 7.27 (m, 1H), 7.01 (d,  $J$  = 8.4 Hz, 1H), 4.98 (s, 2H), 4.77 (s, 2H), 2.64 (s, 3H), 2.30 (s, 3H) ppm.

<sup>13</sup>C NMR (126 MHz, CDCl<sub>3</sub>)  $\delta$  = 200.1, 154.8, 134.1, 133.8, 132.5, 131.4, 130.8, 130.6, 129.8, 128.7, 124.7, 121.8, 113.5, 76.7, 69.0, 57.0, 52.3, 32.0, 20.3 ppm

HRMS (ESI/Q-TOF) m/z: [M+Na]<sup>+</sup> calcd for C<sub>19</sub>H<sub>17</sub>NNaO<sub>4</sub>S 378.0770; Found 378.0787.

IR (neat):  $\nu$  = 2924, 2869, 2245, 1672, 1493, 1326, 1217, 1178, 996, 898, 815, 759 cm<sup>-1</sup>

R<sub>f</sub>: 0.5 (Petroleum ether / Ethyl acetate 2:1 v/v, UV)

**Compound 7c**: 1-(2-((3-(2,2-dioxidobenzo[c]isothiazol-1(3H)-yl)prop-2-yn-1-yl)oxy)-5-fluorophenyl)ethan-1-one

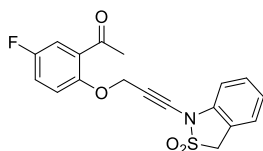

$C_{18}H_{14}FNO_4S$

MW: 359.37 g. mol<sup>-1</sup>

Colorless gum

75%

<sup>1</sup>H NMR (300 MHz, CDCl<sub>3</sub>) δ = 7.86 (d, *J* = 7.7 Hz, 1H), 7.74 – 7.69 (m, 1H), 7.62 (t, *J* = 7.6 Hz, 1H), 7.50 – 7.41 (m, 2H), 7.25 – 7.18 (m, 1H), 7.13 – 7.09 (m, 1H), 5.03 (s, 2H), 4.80 (s, 2H), 2.68 (s, 3H) ppm.

<sup>13</sup>C NMR (126 MHz, CDCl<sub>3</sub>): δ = 198.5, 198.4, 158.2, 156.3, 153.0, 153.0, 133.9, 132.6, 131.3, 130.2, 130.1, 129.9, 124.6, 122.0, 120.1, 119.9, 116.7, 116.5, 115.3, 115.3, 77.2, 68.7, 57.7, 52.2, 31.9 ppm.

HRMS (ESI/Q-TOF) *m/z*: [M+Na]<sup>+</sup> calcd for C<sub>18</sub>H<sub>14</sub>FNNaO<sub>4</sub>S 382.0519; Found 382.0500.

IR (neat): ν = 3050, 2930, 2243, 1655, 1488, 1470, 1417, 1360, 1269, 1169, 995, 861 cm<sup>-1</sup>

R<sub>f</sub>: 0.5 (Petroleum ether / Ethyl acetate 2:1 v/v, UV)

**Compound 7d**: *N*-(3-(2-acetyl-4-fluorophenoxy)prop-1-yn-1-yl)-*N*-benzyl-4-methylbenzenesulfonamide

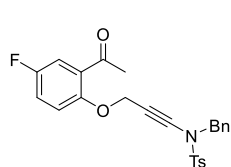

C<sub>25</sub>H<sub>22</sub>FNO<sub>4</sub>S

MW: 451.51 g. mol<sup>-1</sup>

Colorless gum

73%

<sup>1</sup>H NMR (300 MHz, CDCl<sub>3</sub>) δ = 7.63 (d, *J* = 8.4 Hz, 2H), 7.47 – 7.43 (dd, *J* = 8.9, 3.3 Hz, 1H), 7.33 – 7.17 (m, 7H), 7.11 – 7.05 (m, 1H), 6.86 – 6.82 (m, 1H), 4.84 (s, 2H), 4.48 (s, 2H), 2.53 (s, 3H), 2.44 (s, 3H) ppm.

<sup>13</sup>C NMR (126 MHz, CDCl<sub>3</sub>): δ = 198.2, 158.0, 156.1, 152.9, 152.9, 145.0, 134.4, 134.0, 129.9, 129.9, 129.8, 128.6, 128.4, 127.5, 119.9, 119.8, 116.6, 116.4, 115.1, 115.0, 81.7, 66.5, 57.2, 55.2, 31.8, 21.7 ppm.

HRMS (ESI/Q-TOF) *m/z*: [M+Na]<sup>+</sup> calcd for C<sub>25</sub>H<sub>22</sub>FNNaO<sub>4</sub>S 474.1146; Found 474.1136.

IR (neat): ν = 2970, 2938, 2247, 1677, 1489, 1418, 1327, 1269, 1225, 1180, 995 cm<sup>-1</sup>

R<sub>f</sub>: 0.50 (Petroleum ether / Ethyl acetate 5:1 v/v, UV)

**Compound 7e**: *N*-(3-(2-acetyl-4-methylphenoxy)prop-1-yn-1-yl)-*N*-benzyl-4-methylbenzenesulfonamide

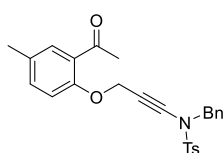

C<sub>26</sub>H<sub>25</sub>NO<sub>4</sub>S

MW: 447.55 g. mol<sup>-1</sup>

Colorless gum

80%

**<sup>1</sup>H NMR (400 MHz, CDCl<sub>3</sub>):** δ = 7.63 (d, *J* = 8.3 Hz, 2H), 7.56 (d, *J* = 2.2 Hz, 1H), 7.34 – 7.25 (m, 3H), 7.25 – 7.19 (m, 5H), 6.82 (d, *J* = 8.4 Hz, 1H), 4.83 (s, 2H), 4.48 (s, 2H), 2.53 (s, 3H), 2.43 (s, 3H), 2.34 (s, 3H) ppm.

**<sup>13</sup>C NMR (126 MHz, CDCl<sub>3</sub>):** δ = 200.1, 154.8, 144.9, 134.5, 134.2, 134.1, 130.7, 130.6, 129.8, 128.7, 128.6, 128.5, 127.6, 113.3, 81.4, 66.9, 56.6, 55.4, 32.0, 21.8, 20.4 ppm.

**HRMS (ESI/Q-TOF) m/z:** [M+Na]<sup>+</sup> calcd for C<sub>26</sub>H<sub>25</sub>NaNO<sub>4</sub>S 470.1397; Found 470.1390.

**IR (neat):** ν = 2923, 2864, 2243, 1672, 1597, 1492, 1455, 1403, 1357, 1286, 1167, 999, 811 cm<sup>-1</sup>

**R<sub>f</sub>:** 0.50 (Petroleum ether / Ethyl acetate 5:1 v/v, UV)

**Compound 7f:** *N*-(3-(2-acetyl-4-chlorophenoxy)prop-1-yn-1-yl)-*N*-benzyl-4-methylbenzenesulfonamide

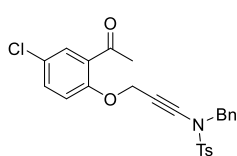

C<sub>25</sub>H<sub>22</sub>ClNO<sub>4</sub>S  
MW: 467.96 g. mol<sup>-1</sup>  
Colorless gum  
80%

**<sup>1</sup>H NMR (300 MHz, CDCl<sub>3</sub>)** δ = 7.69 (d, *J* = 2.7 Hz, 1H), 7.63 (d, *J* = 8.3 Hz, 2H), 7.32 – 7.24 (m, 5H), 7.22 – 7.16 (m, 3H), 6.81 (d, *J* = 8.9 Hz, 1H), 4.84 (s, 2H), 4.47 (s, 2H), 2.51 (s, 3H), 2.43 (s, 3H) ppm.

**<sup>13</sup>C NMR (126 MHz, CDCl<sub>3</sub>):** δ = 198.2, 155.2, 145.1, 134.4, 134.1, 133.0, 130.0, 123.0, 129.9, 128.6, 128.5, 127.5, 126.5, 115.0, 81.9, 66.5, 56.9, 55.3, 31.9, 21.7 ppm.

**HRMS (ESI/Q-TOF) m/z:** [M+Na]<sup>+</sup> calcd for C<sub>25</sub>H<sub>22</sub>ClNNaO<sub>4</sub>S 490.0850; Found 490.0837.

**IR (neat):** ν = 2922, 2244, 1738, 1676, 1593, 1479, 1401, 1361, 1269, 1216, 1168, 994 cm<sup>-1</sup>

**R<sub>f</sub>:** 0.5 (Petroleum ether / Ethyl acetate 5:1 v/v, UV)

**Compound 7g:** 1-(2-((3-(2, 2-dioxidobenzo[c]isothiazol-1(3H)-yl)prop-2-yn-1-yl)oxy)phenyl)propan-1-one

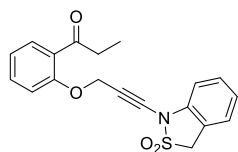

$C_{19}H_{17}NO_4S$   
MW: 355.41 g. mol<sup>-1</sup>  
Colorless gum  
79%

**<sup>1</sup>H NMR (300 MHz, CDCl<sub>3</sub>)**  $\delta$  = 7.86 (d,  $J$  = 7.4 Hz, 1H), 7.74 – 7.71 (m, 2H), 7.62 (t,  $J$  = 7.6 Hz, 1H), 7.53 – 7.41 (m, 2H), 7.15 – 7.04 (m, 2H), 5.03 (s, 2H), 4.80 (s, 2H), 3.06 (q,  $J$  = 7.3 Hz, 2H), 1.20 (t,  $J$  = 7.3 Hz, 3H) ppm.

**<sup>13</sup>C NMR (126 MHz, CDCl<sub>3</sub>)**:  $\delta$  = 203.6, 156.3, 133.8, 133.0, 132.6, 131.4, 130.3, 129.8, 129.4, 124.6, 122.0, 121.5, 113.4, 68.9, 56.9, 52.3, 37.2, 8.5 ppm.

**HRMS (ESI/Q-TOF) m/z:** [M+ Na]<sup>+</sup> calcd for C<sub>19</sub>H<sub>17</sub>NNaO<sub>4</sub>S 378.0770; Found 378.0785.

**IR (neat):**  $\nu$  = 3027, 2926, 2244, 1669, 1595, 1480, 1450, 1323, 1282, 1214, 1177, 1133, 1051 cm<sup>-1</sup>

**R<sub>f</sub>:** 0.5 (Petroleum ether / Ethyl acetate 3:1 v/v, UV)

**Compound 7h:** *N*-benzyl-4-methyl-*N*-(3-(2-propionylphenoxy)prop-1-yn-1-yl)benzenesulfonamide

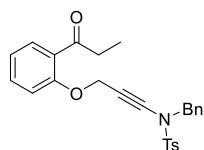

$C_{26}H_{25}NO_4S$   
MW: 447.525g.mol<sup>-1</sup>  
Colorless gum  
82%

**<sup>1</sup>H NMR (300 MHz, CDCl<sub>3</sub>)**  $\delta$  = 7.71 (dd,  $J$  = 7.7, 1.7 Hz, 1H), 7.61 (d,  $J$  = 8.3 Hz, 2H), 7.44 – 7.38 (m, 1H), 7.32 – 7.26 (m, 3H), 7.23 – 7.18 (m, 4H), 7.08 – 7.02 (m, 1H), 6.92 (d,  $J$  = 8.4 Hz, 1H), 4.85 (s, 2H), 4.47 (s, 2H), 2.92 (q,  $J$  = 7.2 Hz, 2H), 2.42 (s, 3H), 1.13 (t,  $J$  = 7.2 Hz, 3H) ppm.

**<sup>13</sup>C NMR (126 MHz, CDCl<sub>3</sub>)**  $\delta$  = 168.6, 152.7, 145.1, 136.3, 135.9, 130.9, 130.1, 129.5, 128.8, 128.5, 128.5, 128.1, 126.5, 125.1, 124.5, 124.3, 117.8, 117.7, 65.6, 49.8, 21.8, 21.7, 14.4 ppm.

**HRMS (ESI/Q-TOF) m/z:** [M+Na]<sup>+</sup> calcd for C<sub>26</sub>H<sub>25</sub>NNaO<sub>4</sub>S 470.1396; Found 470.1398.

**IR (neat):**  $\nu$  = 2936, 2876, 2244, 1673, 1596, 1482, 1452, 1363, 1213, 1168, 1090 cm<sup>-1</sup>

**R<sub>f</sub>:** 0.5 (Petroleum ether / Ethyl acetate 5:1 v/v, UV)

**Compound 7i:** 1-(2-((3-(2, 2-dioxidobenzo[c]isothiazol-1(3H)-yl)prop-2-yn-1-yl)oxy)phenyl)-3-phenylpropan-1-one

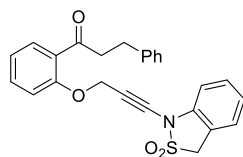

$C_{25}H_{21}NO_4S$   
MW: 431.51 g. mol<sup>-1</sup>  
Colorless gum  
77%

**<sup>1</sup>H NMR (300 MHz, CDCl<sub>3</sub>):**  $\delta$  = 7.85 (d,  $J$  = 7.8 Hz, 1H), 7.75 – 7.67 (m, 2H), 7.61 (t,  $J$  = 7.1 Hz, 1H), 7.53 – 7.48 (m, 1H), 7.40 (d,  $J$  = 7.7 Hz, 1H), 7.30 – 7.23 (m, 4H), 7.21 – 7.15 (m, 1H), 7.14 – 7.03 (m, 2H), 5.00 (s, 2H), 4.67 (s, 2H), 3.45 – 3.34 (m, 2H), 3.10 – 3.00 (m, 2H) ppm.

**<sup>13</sup>C NMR (126 MHz, CDCl<sub>3</sub>)**  $\delta$  = 201.7, 156.5, 141.7, 133.8, 133.4, 132.6, 131.4, 130.5, 129.8, 129.0, 128.5, 128.4, 125.8, 124.6, 121.9, 121.6, 113.3, 77.0, 68.8, 57.0, 52.2, 45.5, 30.5 ppm.

**HRMS (ESI/Q-TOF) m/z:** [M+K]<sup>+</sup> calcd for C<sub>25</sub>H<sub>21</sub>KNO<sub>4</sub>S 470.0823; Found 470.0818.

**IR (neat):**  $\nu$  = 3044, 2929, 2266, 1666, 1480, 1417, 1360, 1269, 1150, 977 cm<sup>-1</sup>

**R<sub>f</sub>:** 0.5 (Petroleum ether / Ethyl acetate 3:1 v/v, UV)

**Compound 10:** (E)-3-(1,1-dioxidobenzo[d]isothiazol-2(3H)-yl)acrylaldehyde

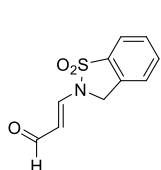

$C_{10}H_9NO_3S$   
MW: 233.25 g. mol<sup>-1</sup>  
Colorless oil  
88%

**<sup>1</sup>H NMR (300 MHz, CDCl<sub>3</sub>)**  $\delta$  = 9.51 (d,  $J$  = 7.8 Hz, 1H), 7.92 (d,  $J$  = 7.5 Hz, 1H), 7.82 – 7.71 (m, 2H), 7.67 (dd,  $J$  = 14.3, 7.1 Hz, 1H), 7.57 (d,  $J$  = 7.8 Hz, 1H), 5.71 (dd,  $J$  = 13.8, 7.8 Hz, 1H), 4.76 (s, 2H) ppm.

**<sup>13</sup>C NMR (126 MHz, CDCl<sub>3</sub>)**  $\delta$  = 190.2, 143.7, 134.3, 133.2, 130.7, 130.1, 125.0, 121.9, 111.5, 47.6 ppm.

**HRMS (ESI/Q-TOF) m/z:** [M+Na]<sup>+</sup> calcd for C<sub>10</sub>H<sub>9</sub>NNaO<sub>3</sub>S 246.0195; Found 246.0201.

**IR (neat):**  $\nu$  = 2955, 2922, 1670, 1625, 1457, 1329, 1290, 1176, 1123, 1032, 1016, 777, 595, 556 cm<sup>-1</sup>

**R<sub>f</sub>:** 0.5 (Petroleum ether / Ethyl acetate 1:1 v/v, UV)

**Compound 11:** *N*-(benzo[d][1,3]dioxol-5-ylmethyl)-2-(3-methylbenzofuran-2-yl)-*N*-tosylacetamide

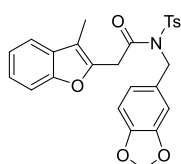

$C_{26}H_{23}NO_6S$

MW: 477.53 g. mol<sup>-1</sup>

Colorless gum

62%

**<sup>1</sup>H NMR (500 MHz, CDCl<sub>3</sub>)**  $\delta$  = 7.69 (d,  $J$  = 8.3 Hz, 2H), 7.46 – 7.40 (m, 1H), 7.36 7.29 (m, 3H), 7.27 – 7.19 (m, 2H), 6.98 – 6.90 (m, 2H), 6.78 (d,  $J$  = 7.9 Hz, 1H), 5.98 (s, 2H), 5.05 (s, 2H), 4.13 (s, 2H), 2.44 (s, 3H), 2.06 (s, 3H) ppm.

**<sup>13</sup>C NMR (126 MHz, CDCl<sub>3</sub>)**  $\delta$  = 168.8, 154.1, 147.8, 147.2, 145.2, 145.1, 136.3, 130.1, 129.9 (x 2), 129.7, 127.6 (x 2), 124.0, 122.3, 122.0, 119.2, 113.5, 110.9, 108.9, 108.2, 101.1, 49.7, 35.0, 21.7, 7.9 ppm.

**HRMS (ESI/Q-TOF) m/z:** [M+Na]<sup>+</sup> calcd for C<sub>26</sub>H<sub>23</sub>NNaO<sub>6</sub>S 500.1138; Found 500.1147.

**IR (neat):**  $\nu$  = 3248, 3068, 3028, 2951, 2139, 1679, 1351, 1246 cm<sup>-1</sup>

**R<sub>f</sub>:** 0.5 (Petroleum ether / Ethyl acetate 4:1 v/v, UV)

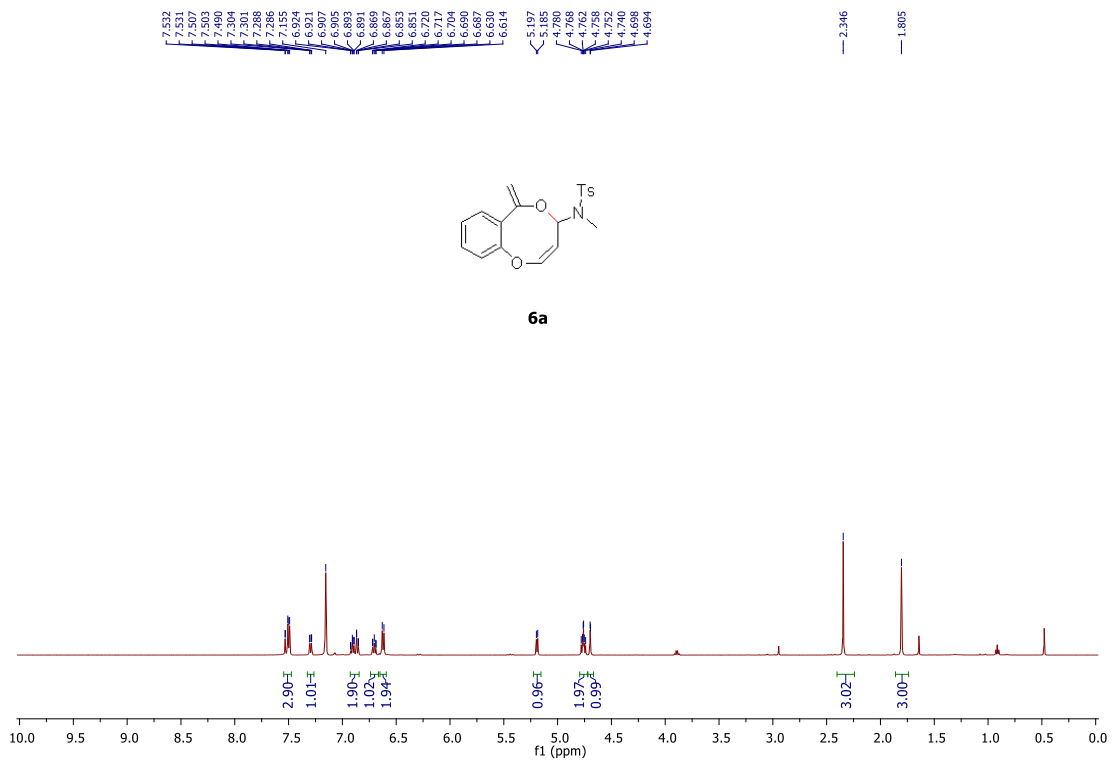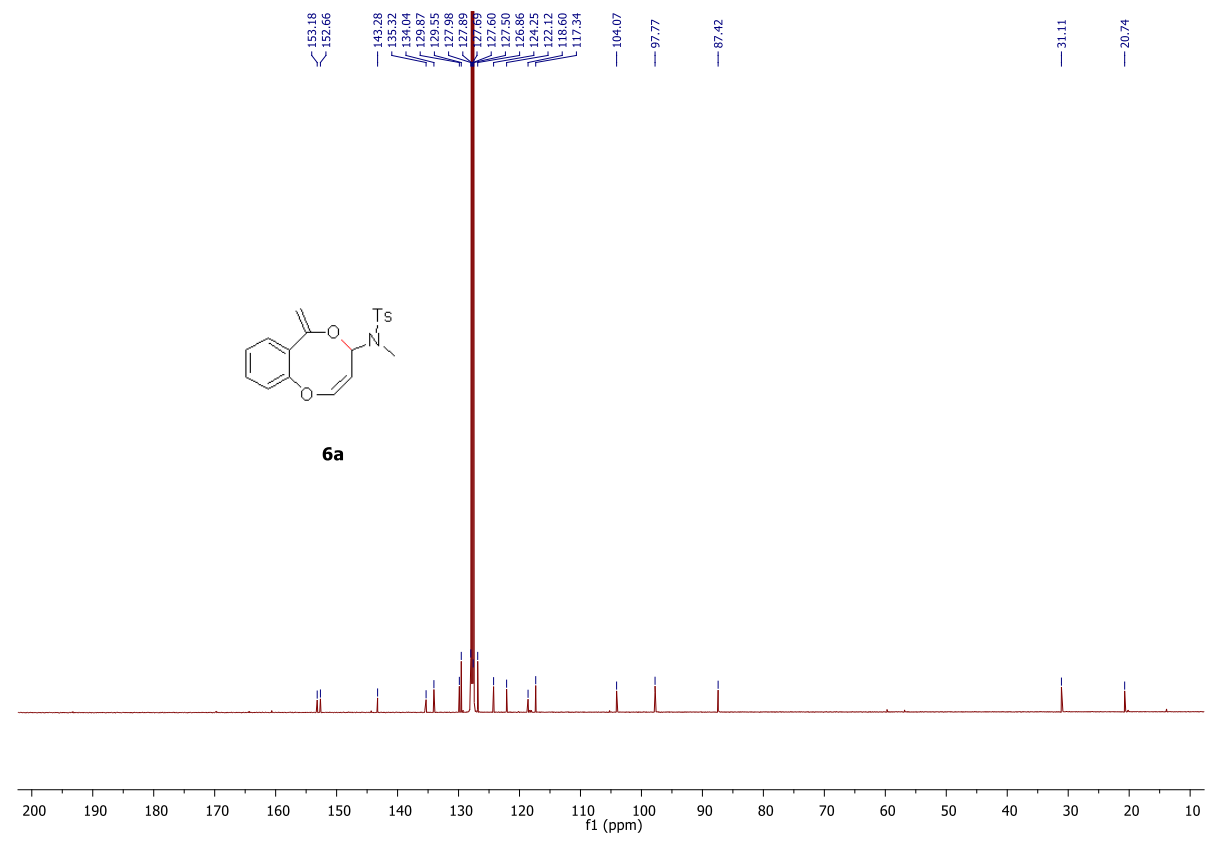



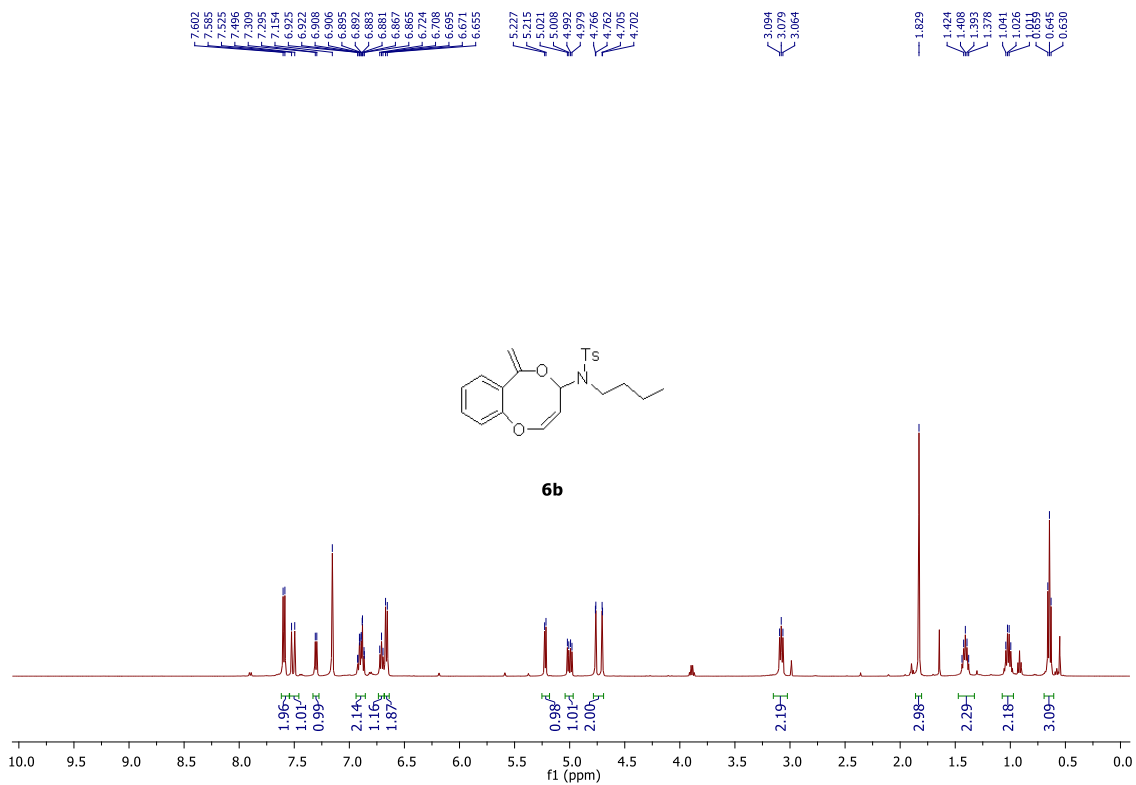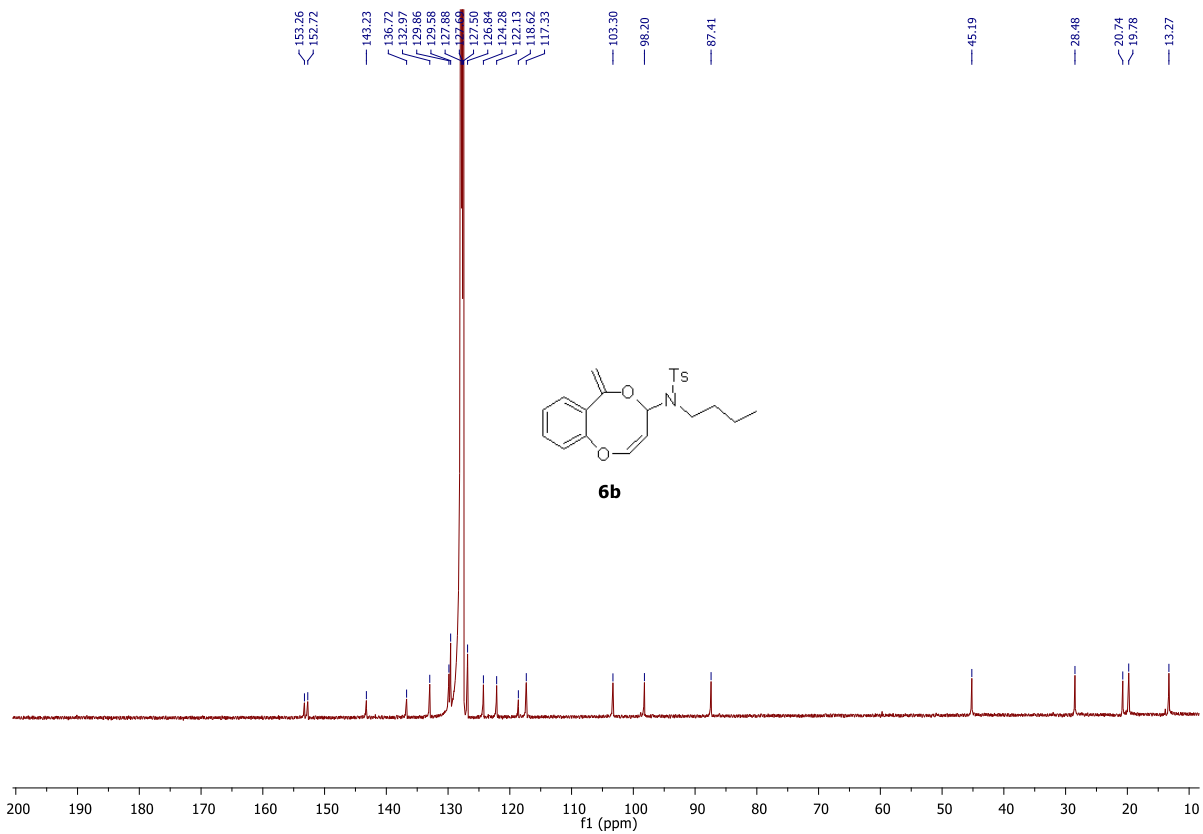

7.656  
7.640  
7.529  
7.500  
7.316  
7.300  
7.298  
7.155  
6.930  
6.913  
6.899  
6.897  
6.891  
6.888  
6.872  
6.723  
6.708  
6.692

5.381  
5.369  
5.353  
5.340  
5.288  
4.773  
4.769  
4.714  
4.710

1.852  
1.352  
1.339  
1.332  
1.326  
0.873  
0.866  
0.858  
0.281  
0.278  
0.268  
0.264

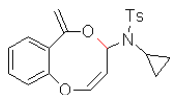

6c

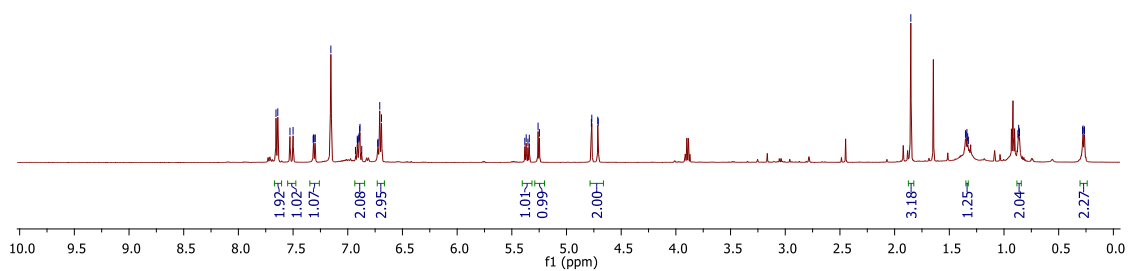

153.22  
152.69  
143.37  
135.33  
135.10  
128.87  
127.98  
127.88  
127.69  
127.59  
127.49  
127.40  
124.27  
106.88  
97.91  
87.42  
26.69  
20.79  
7.71  
7.68

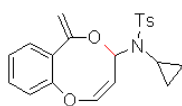

6c

200  
190  
180  
170  
160  
150  
140  
130  
120  
110  
100  
90  
80  
70  
60  
50  
40  
30  
20  
10  
0

f1 (ppm)

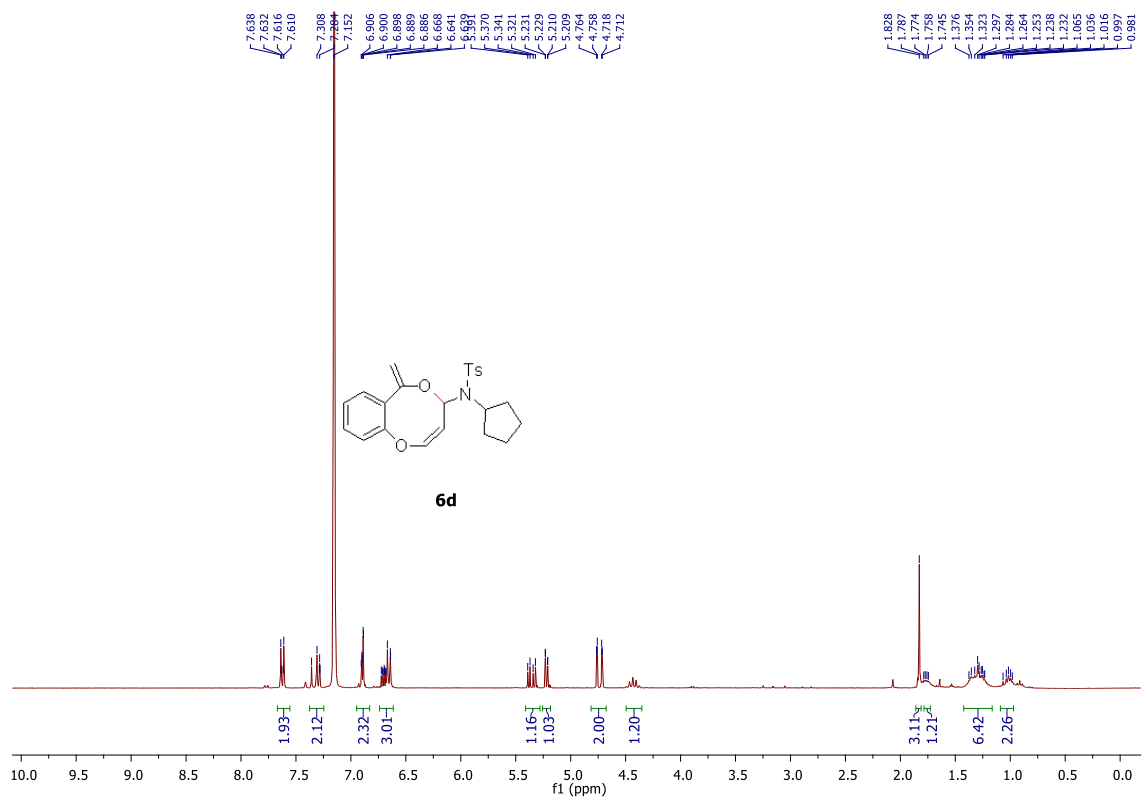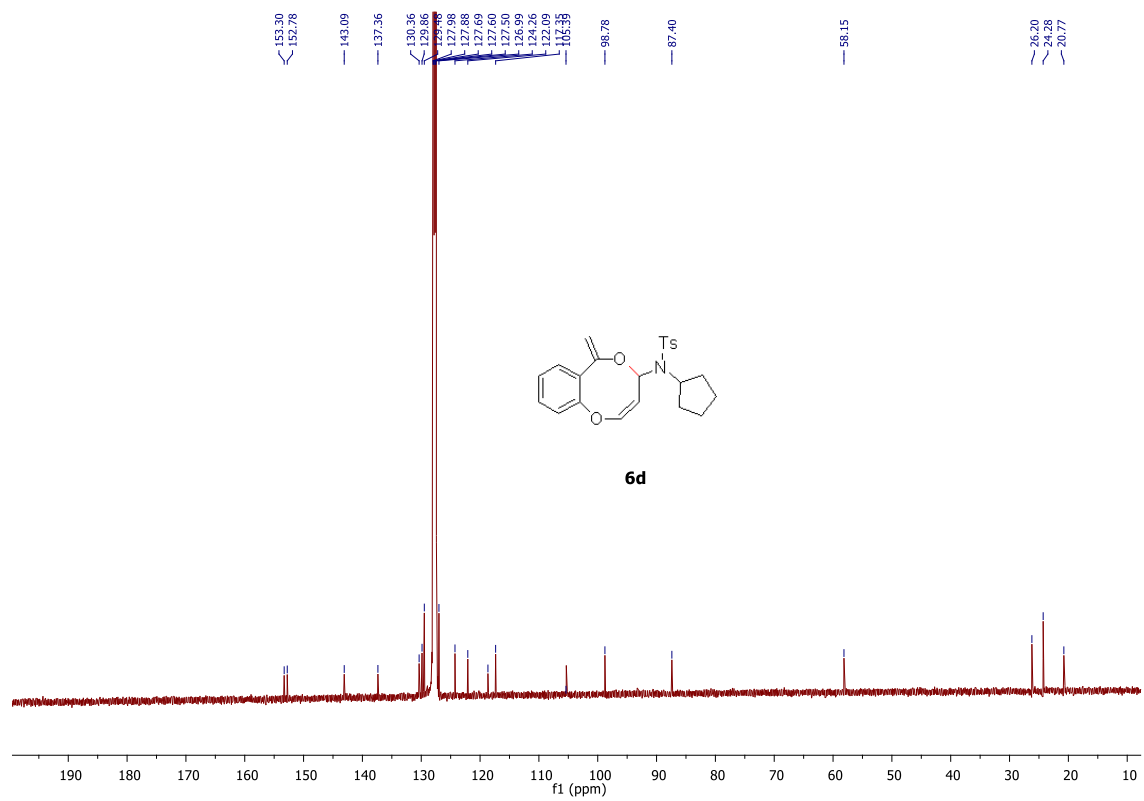

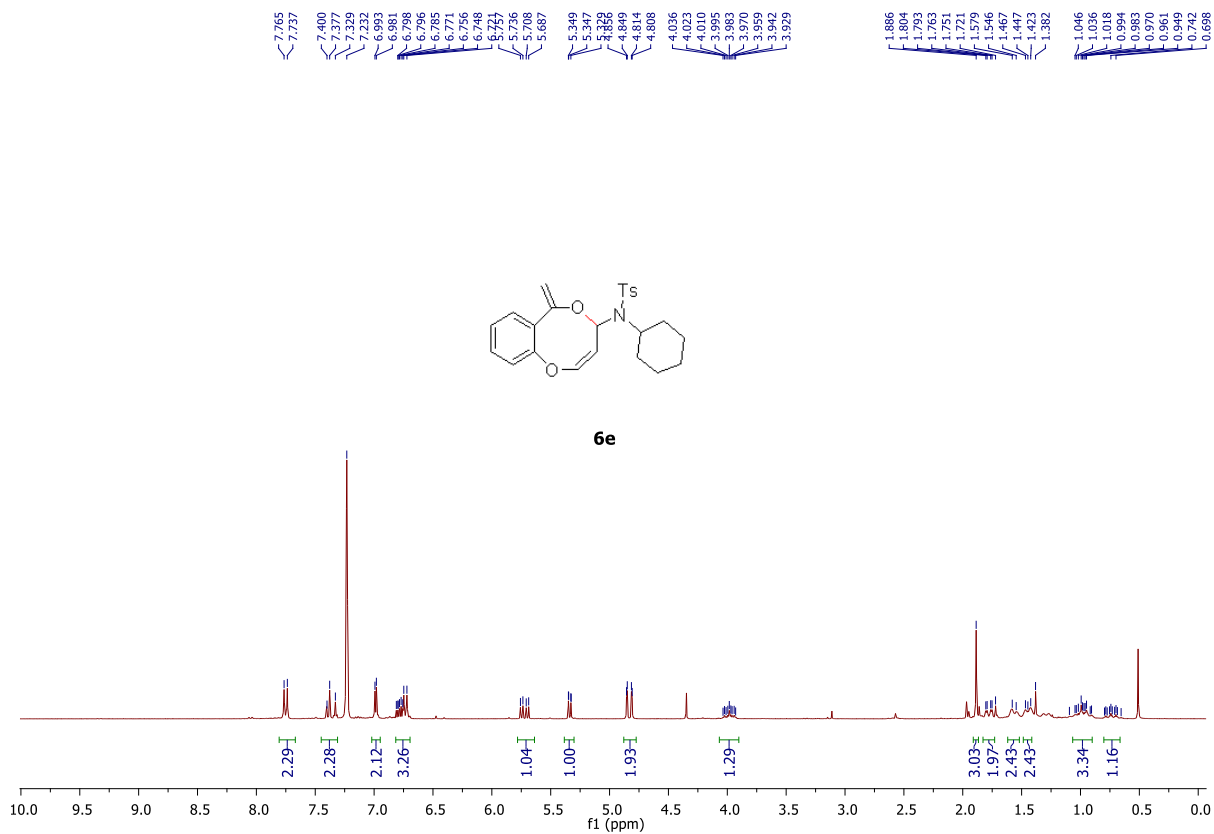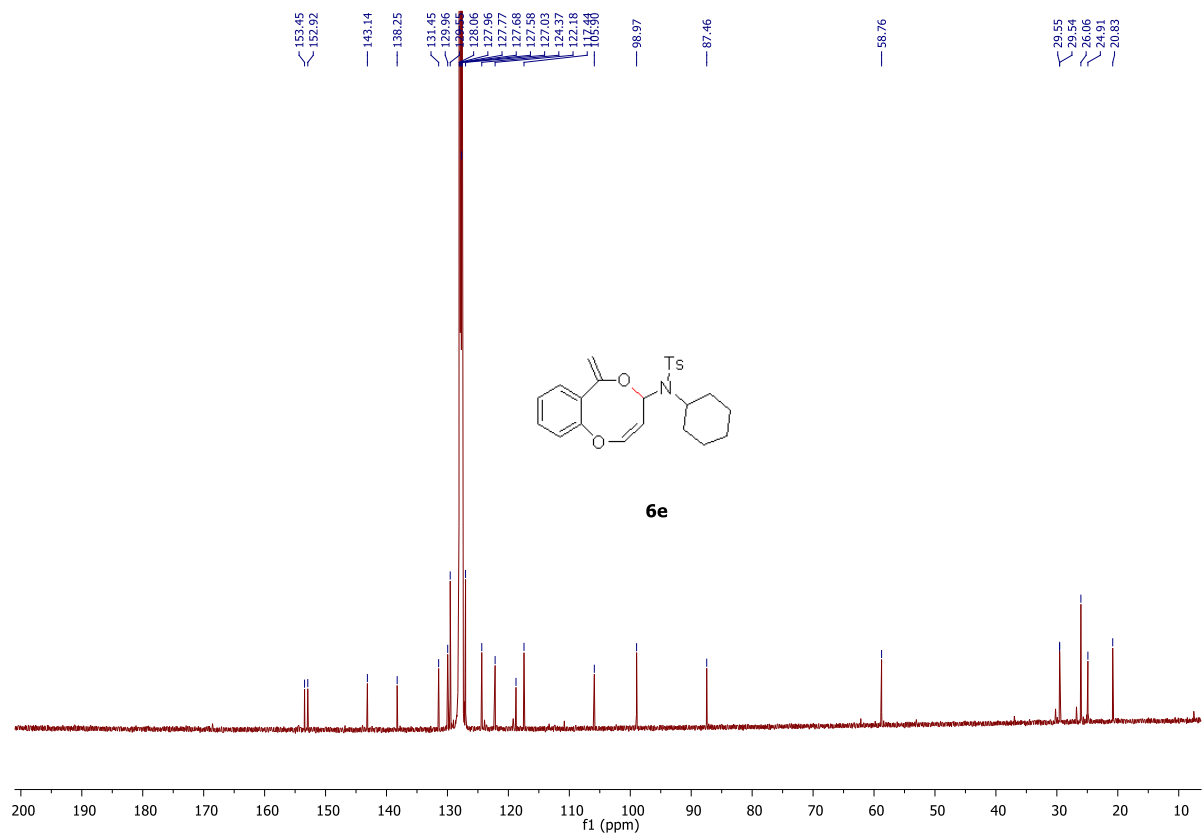

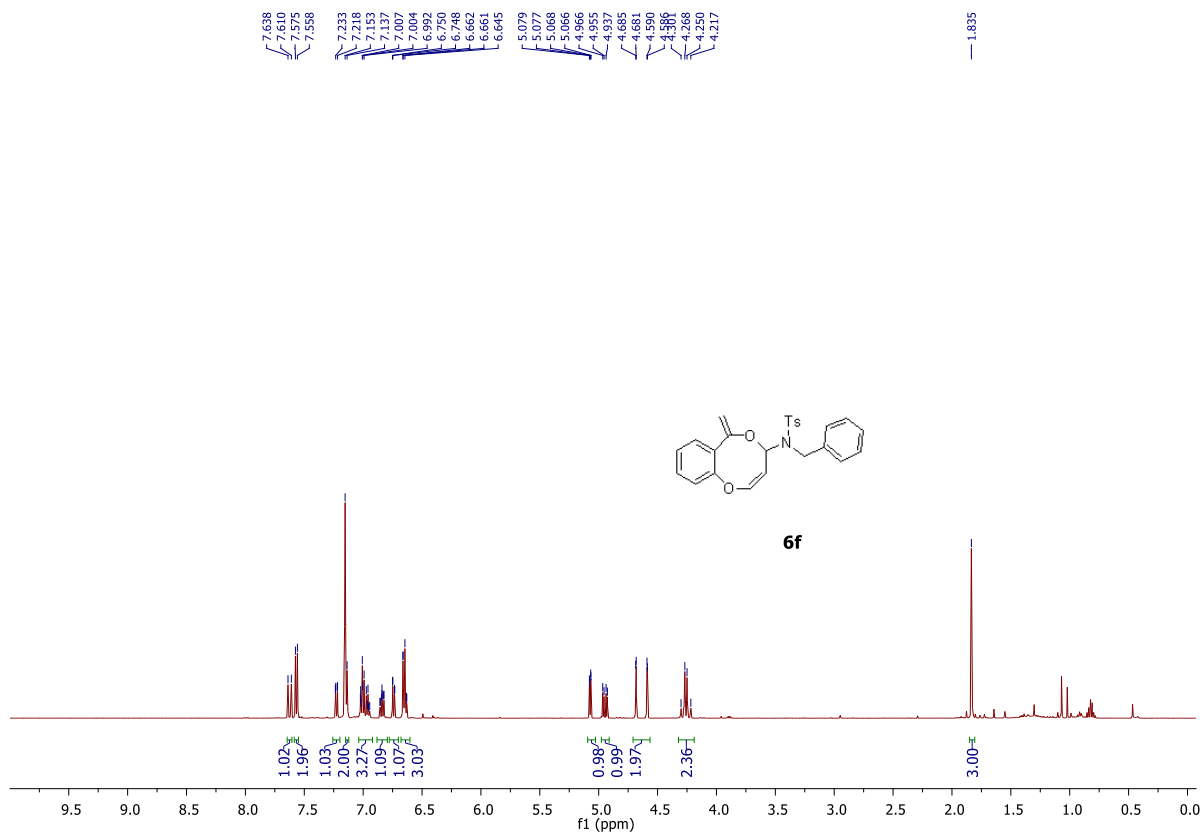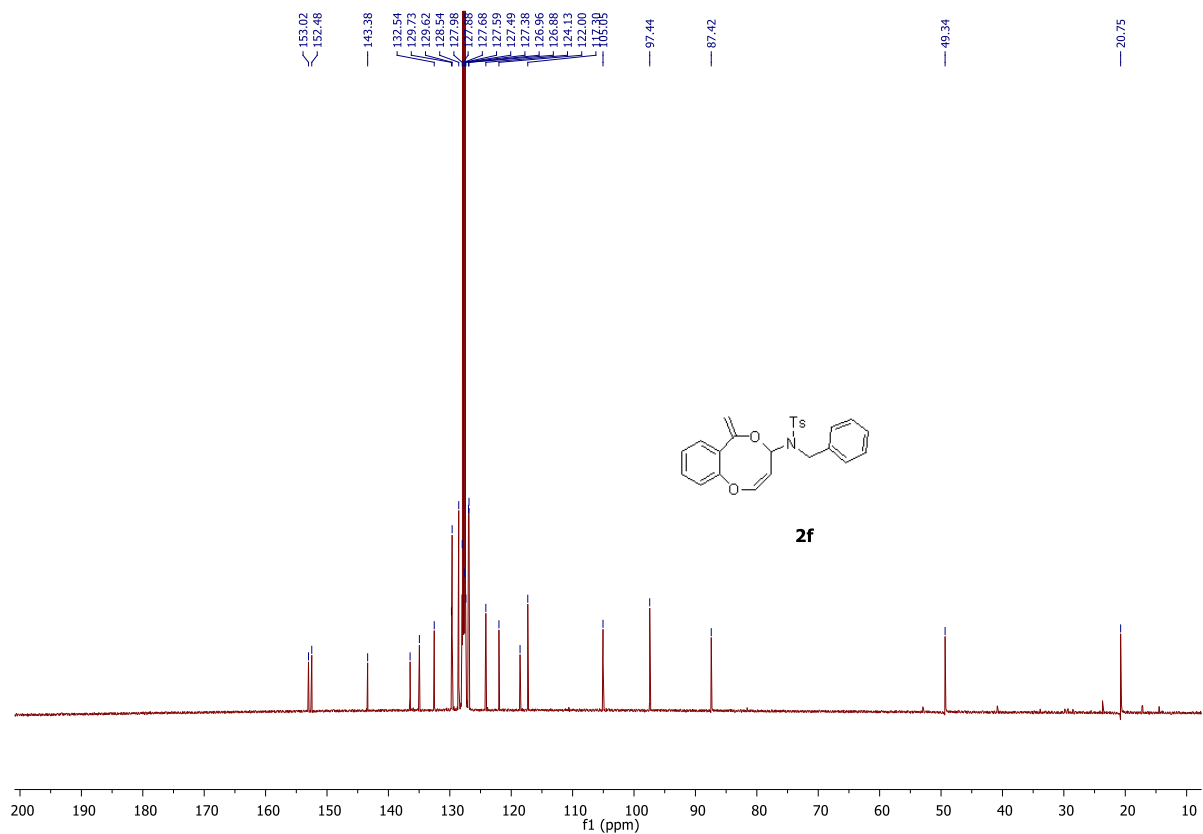

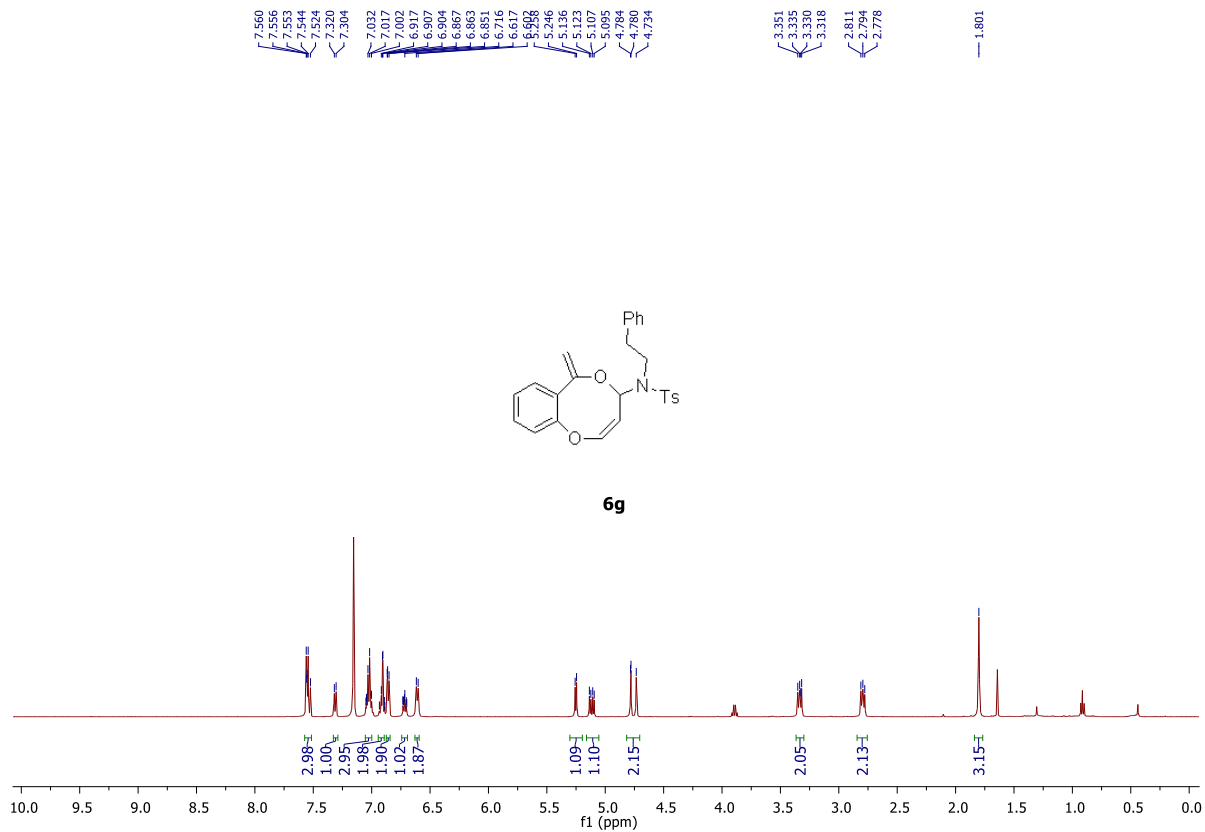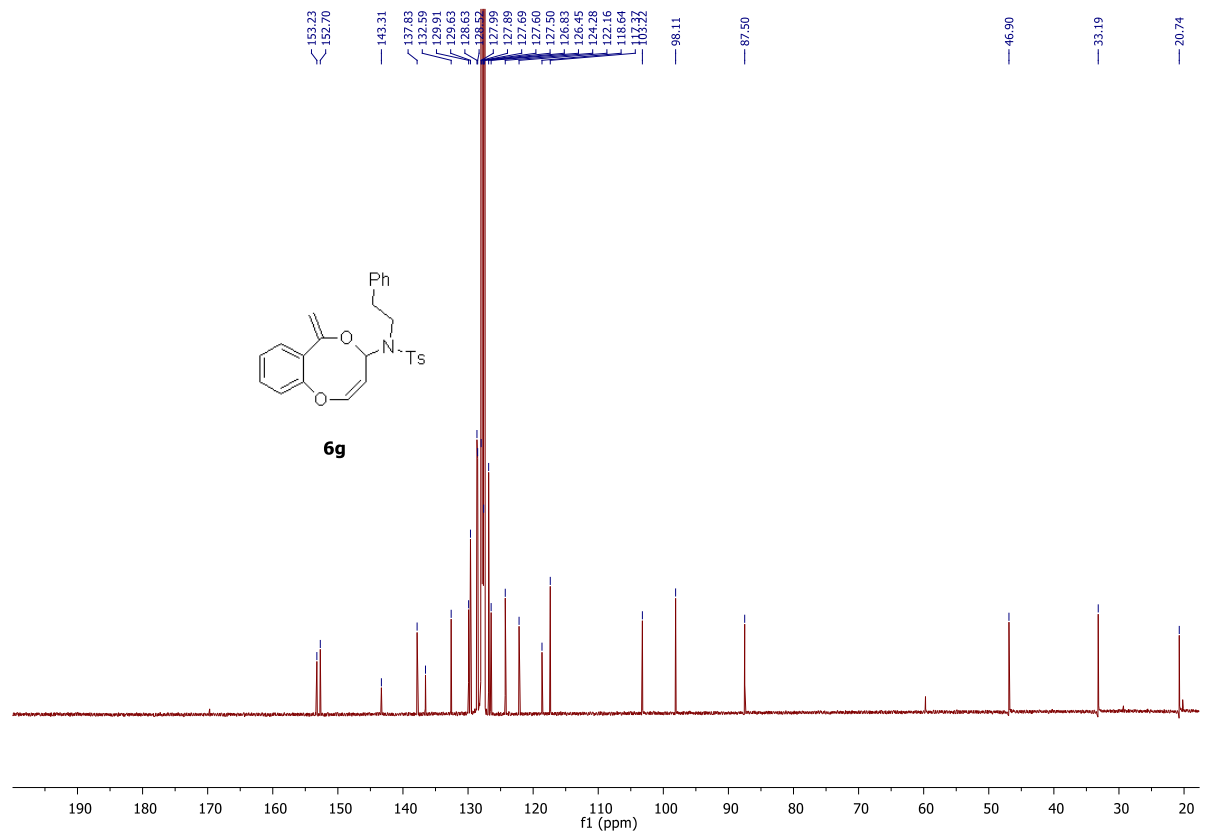

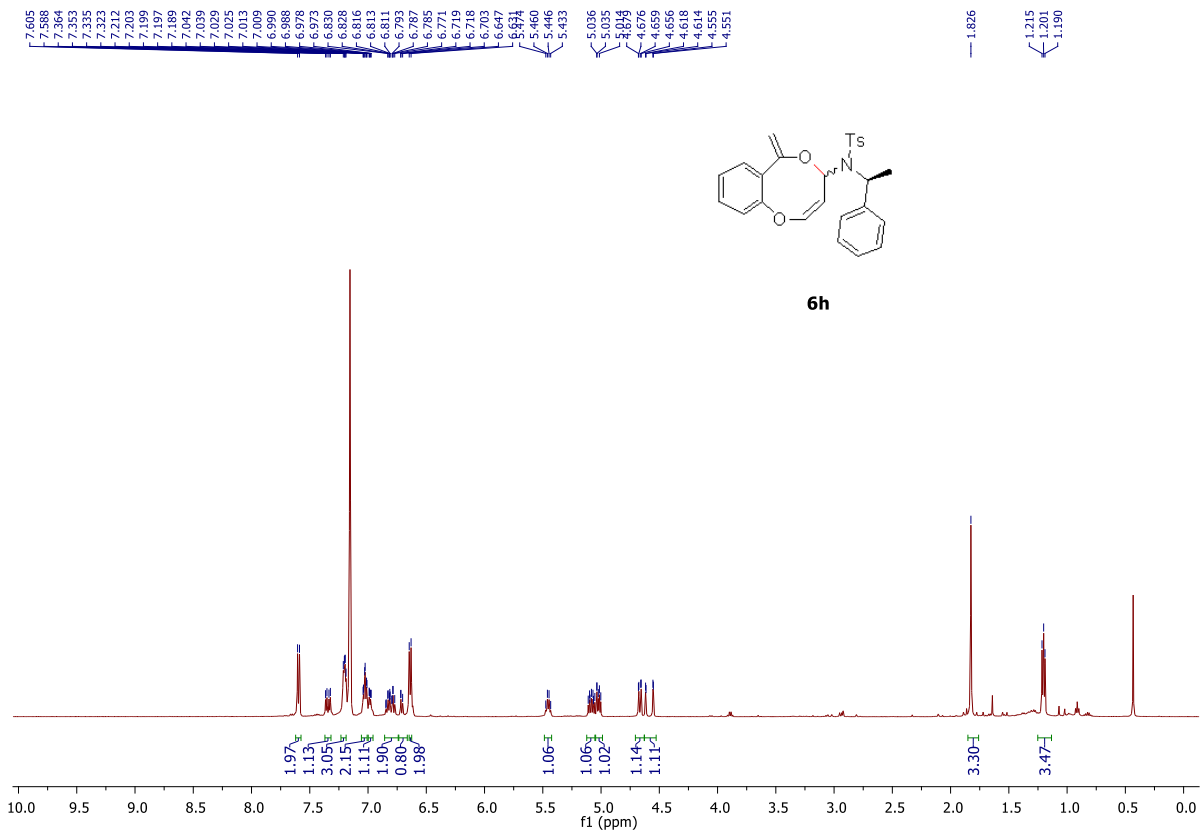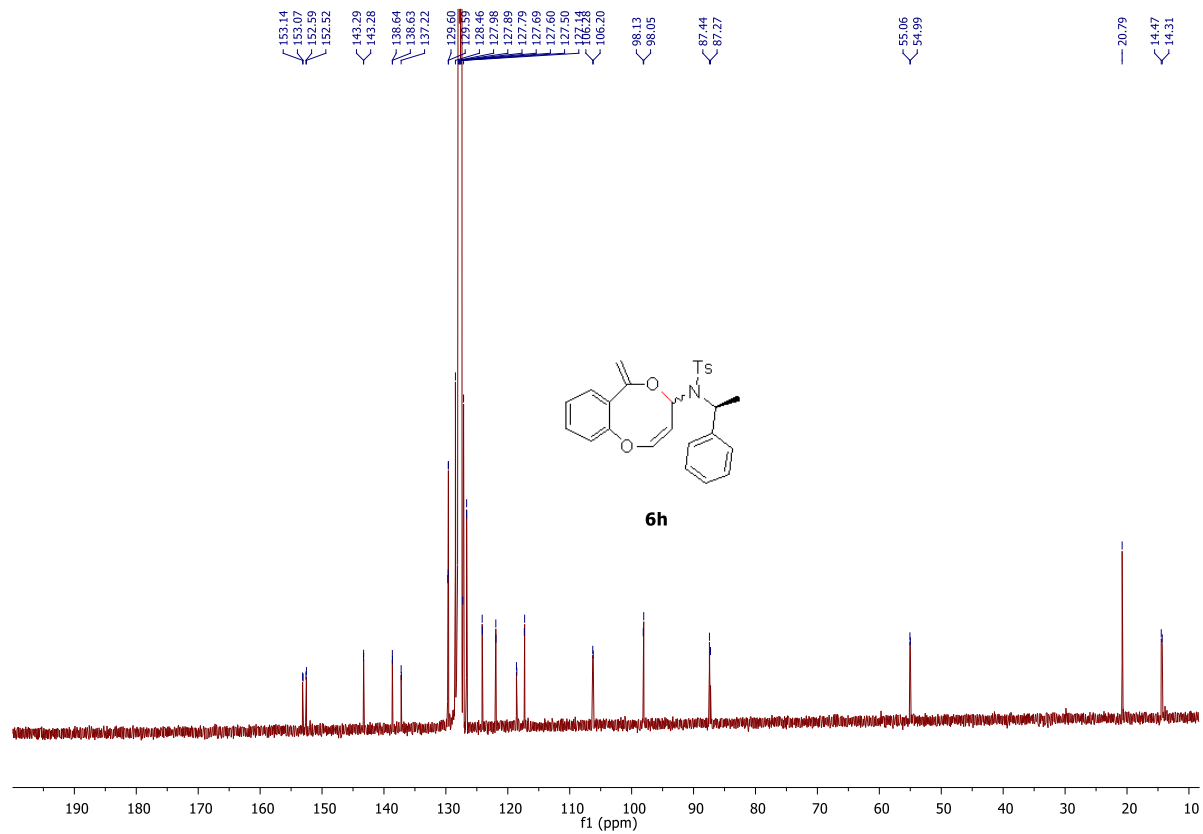

7.593  
7.569  
7.565  
7.552  
7.245  
7.243  
7.155  
6.824  
6.821  
6.761  
6.759  
6.683  
6.669  
6.667  
6.656  
6.656  
5.207  
5.207  
5.120  
5.119  
5.117  
5.108  
5.107  
5.045  
5.017  
4.696  
4.693  
4.597  
4.595  
4.194  
4.162  
4.139  
4.107

1.853

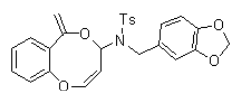

6i

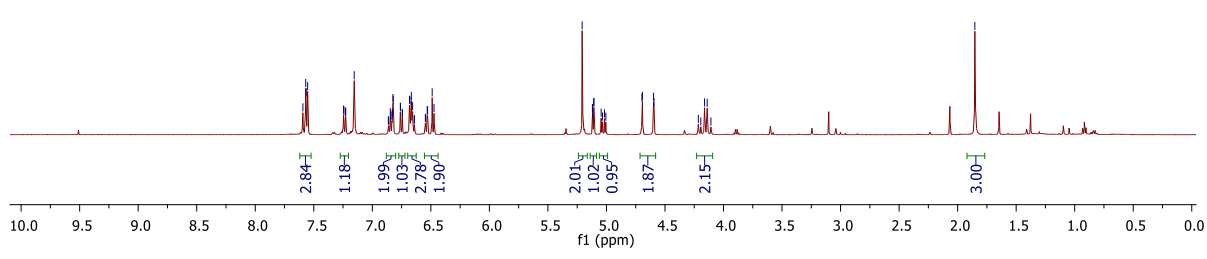

153.03  
152.49  
148.27  
147.26  
143.49  
132.69  
129.77  
129.66  
128.66  
127.99  
127.89  
127.70  
127.50  
126.95  
126.16  
122.05  
120.44  
118.54  
117.31  
117.24  
107.45  
105.06  
100.73  
97.62  
87.47  
49.15  
20.79

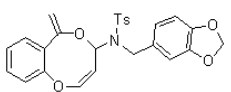

6i

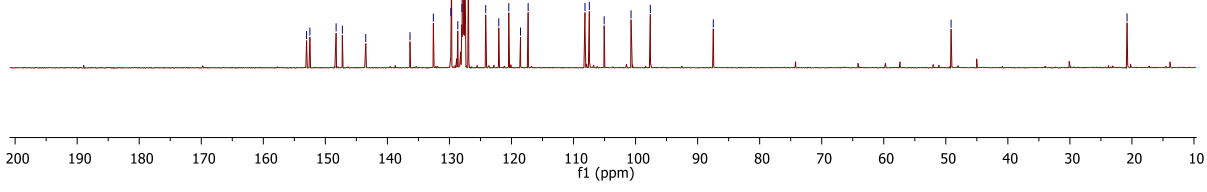



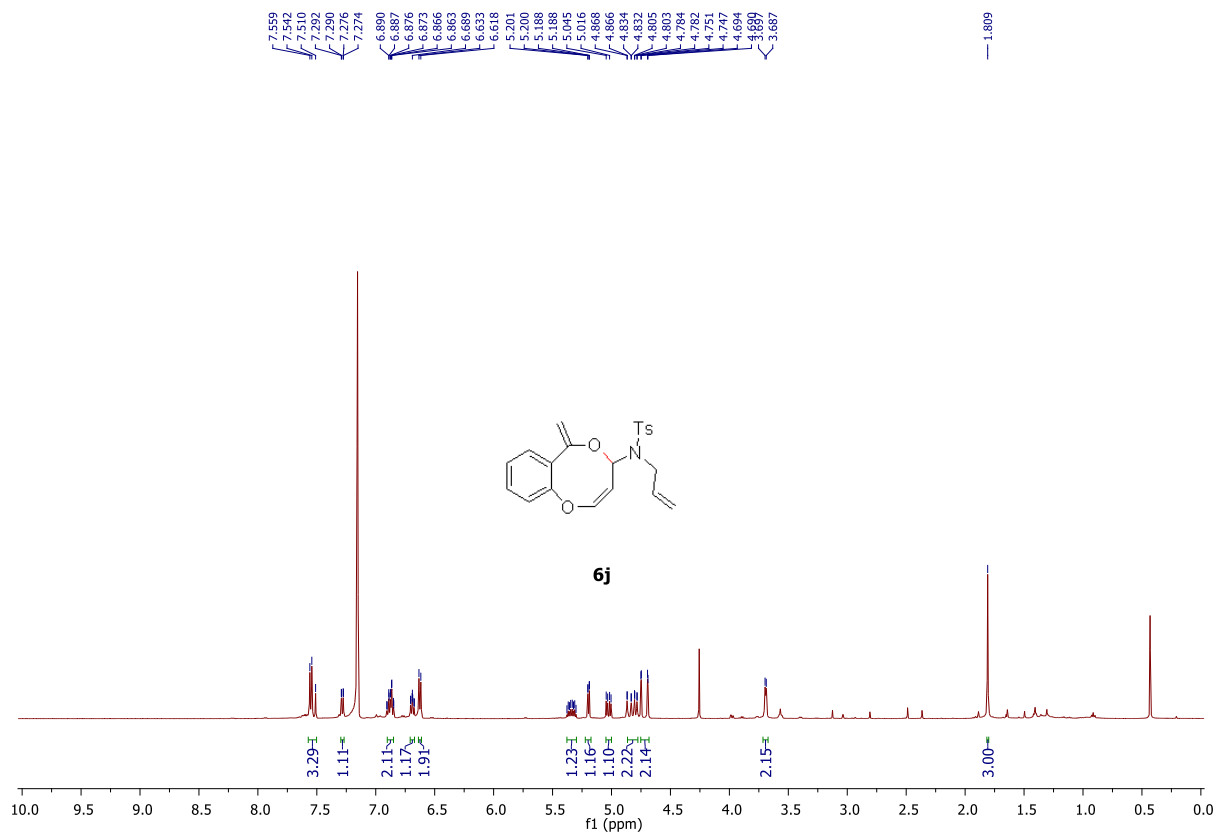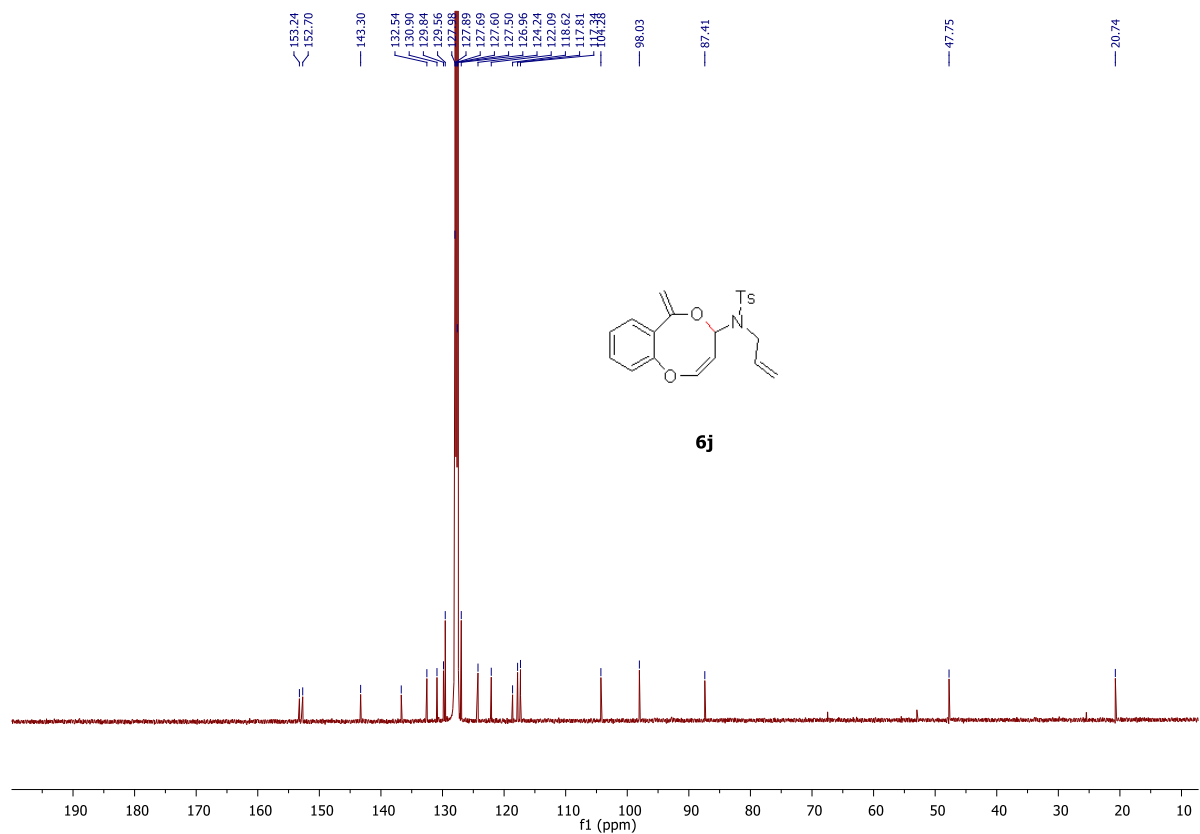

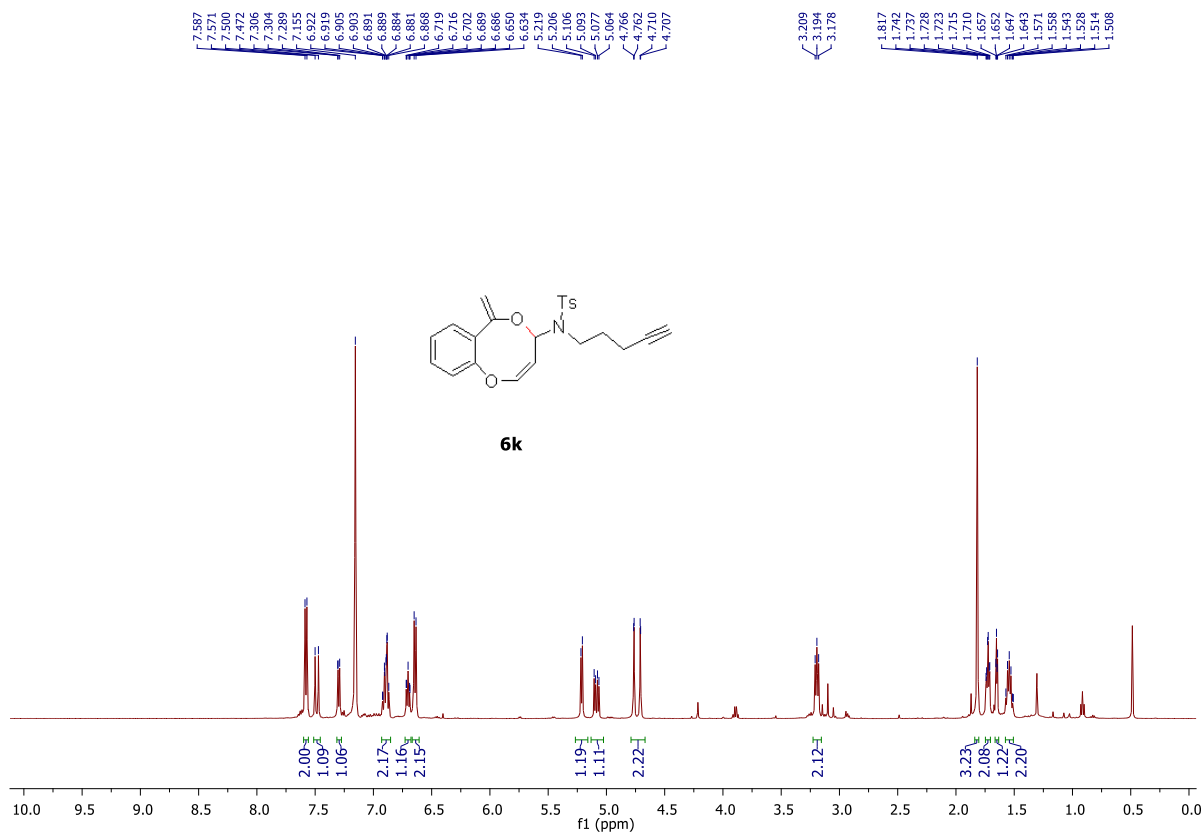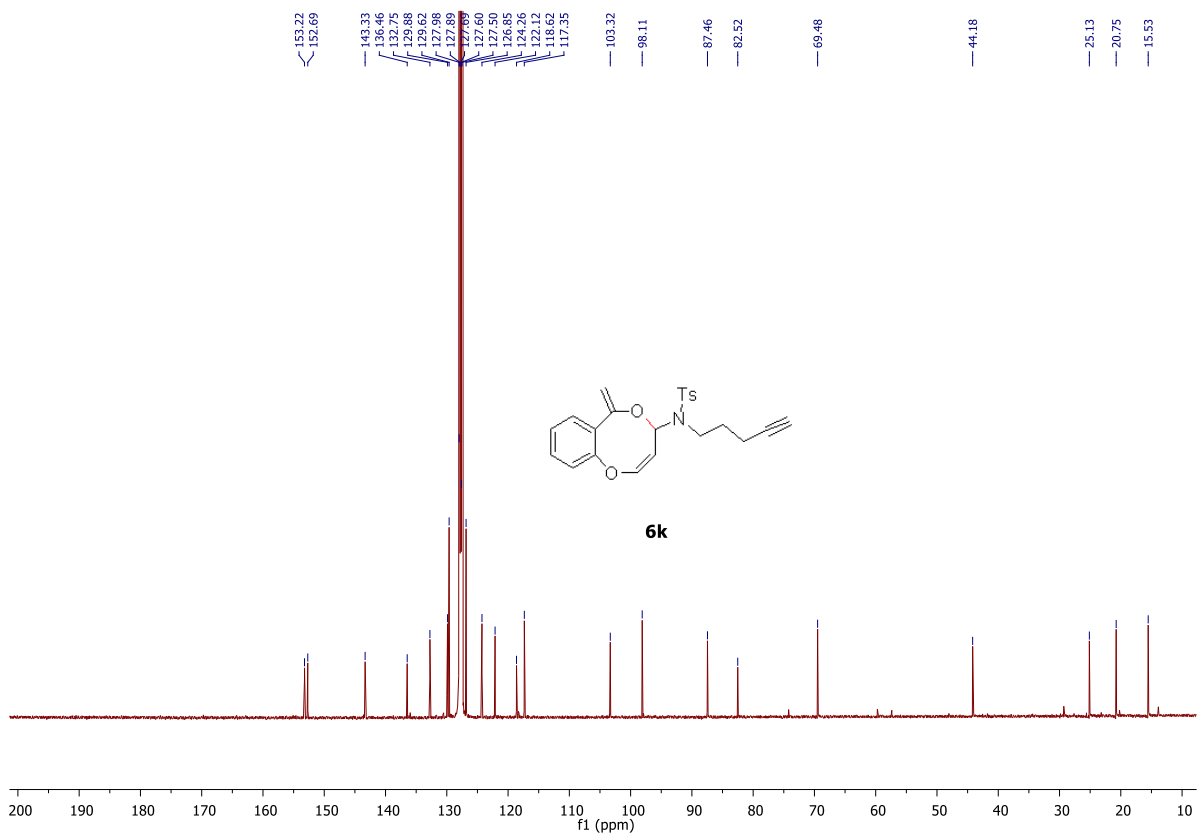

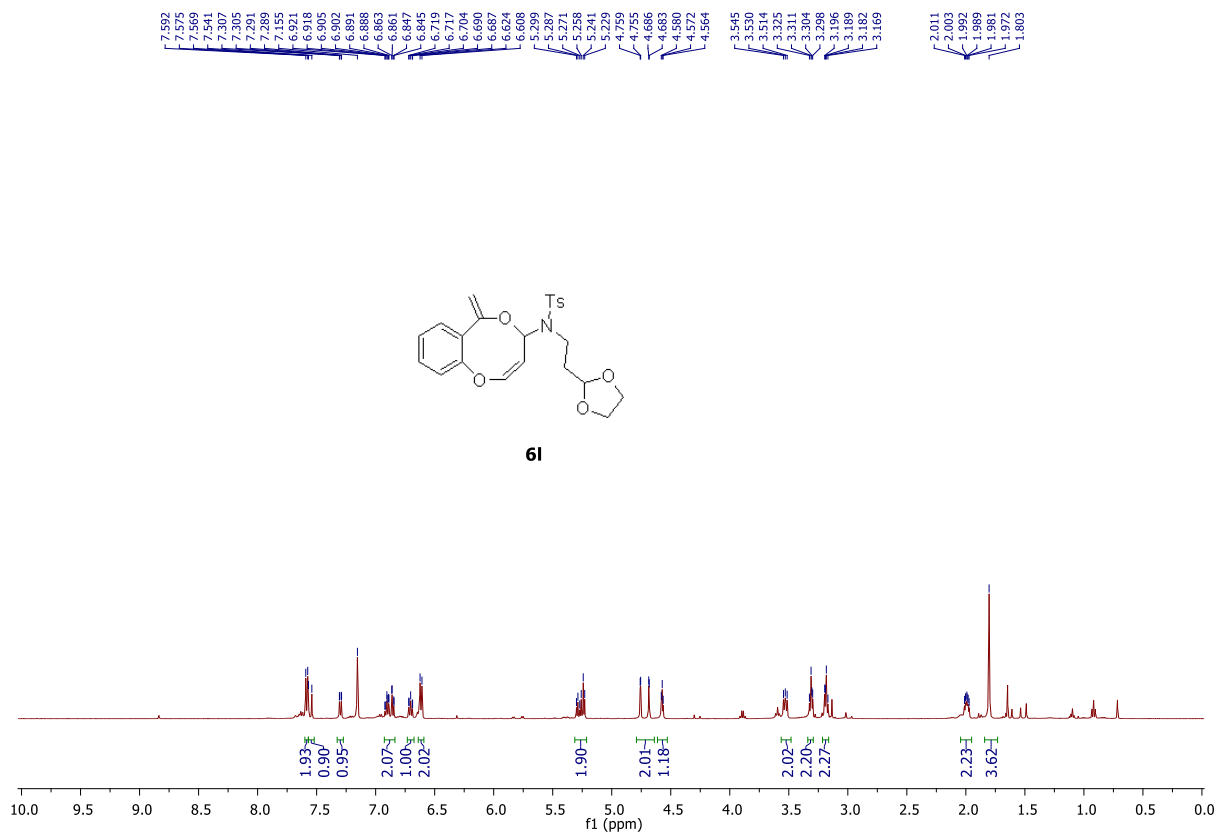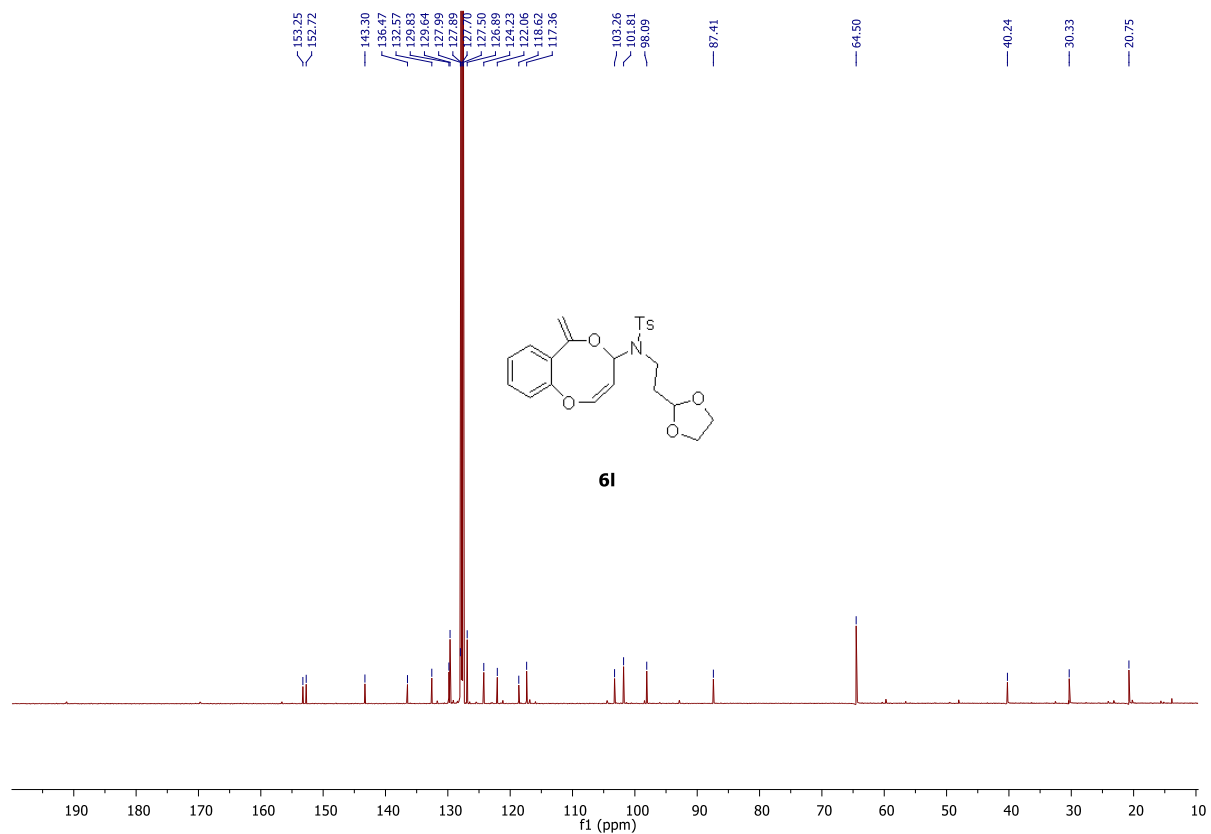

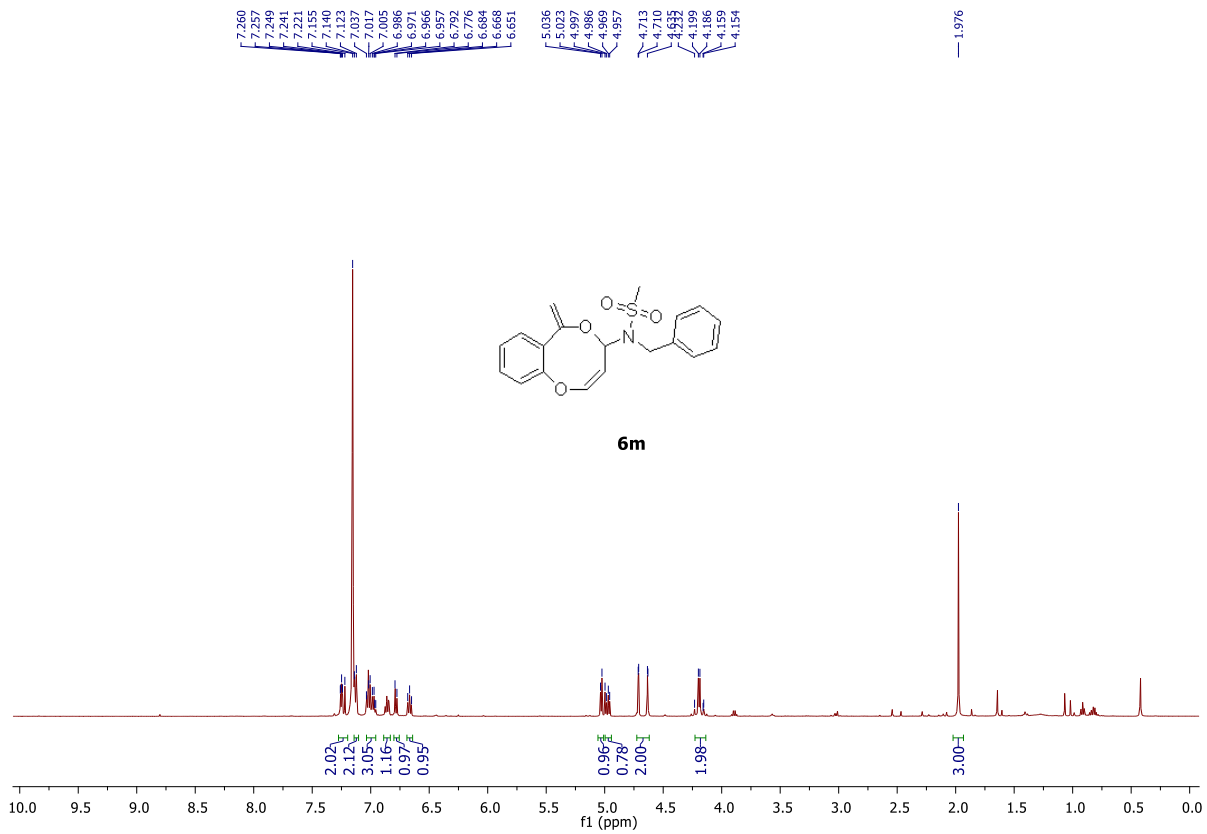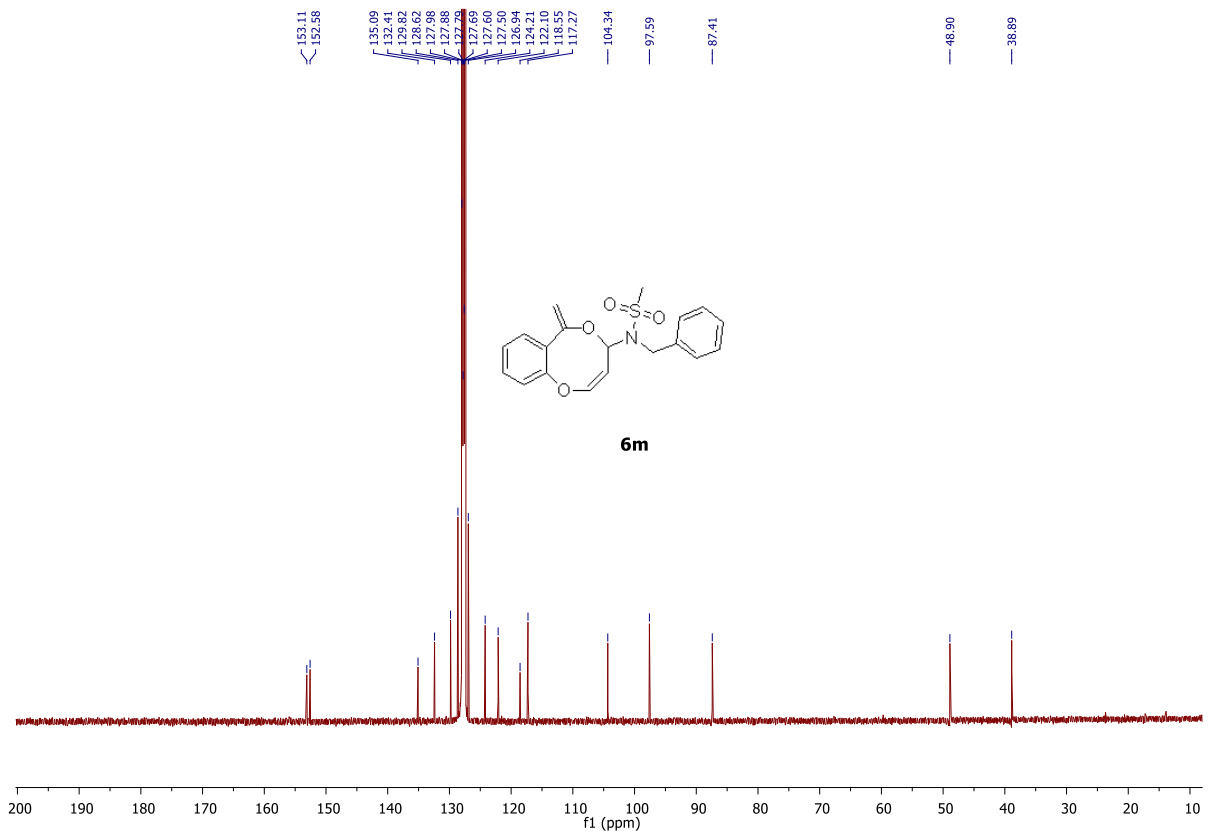

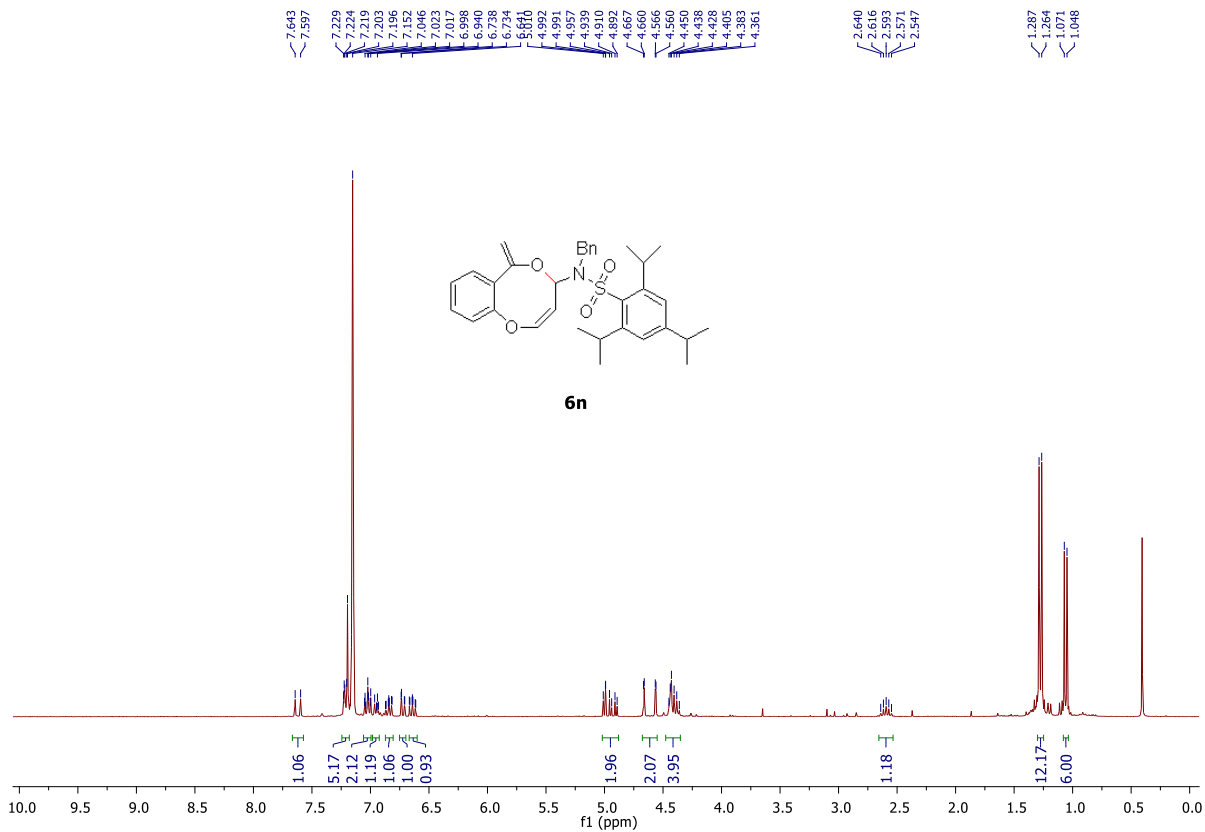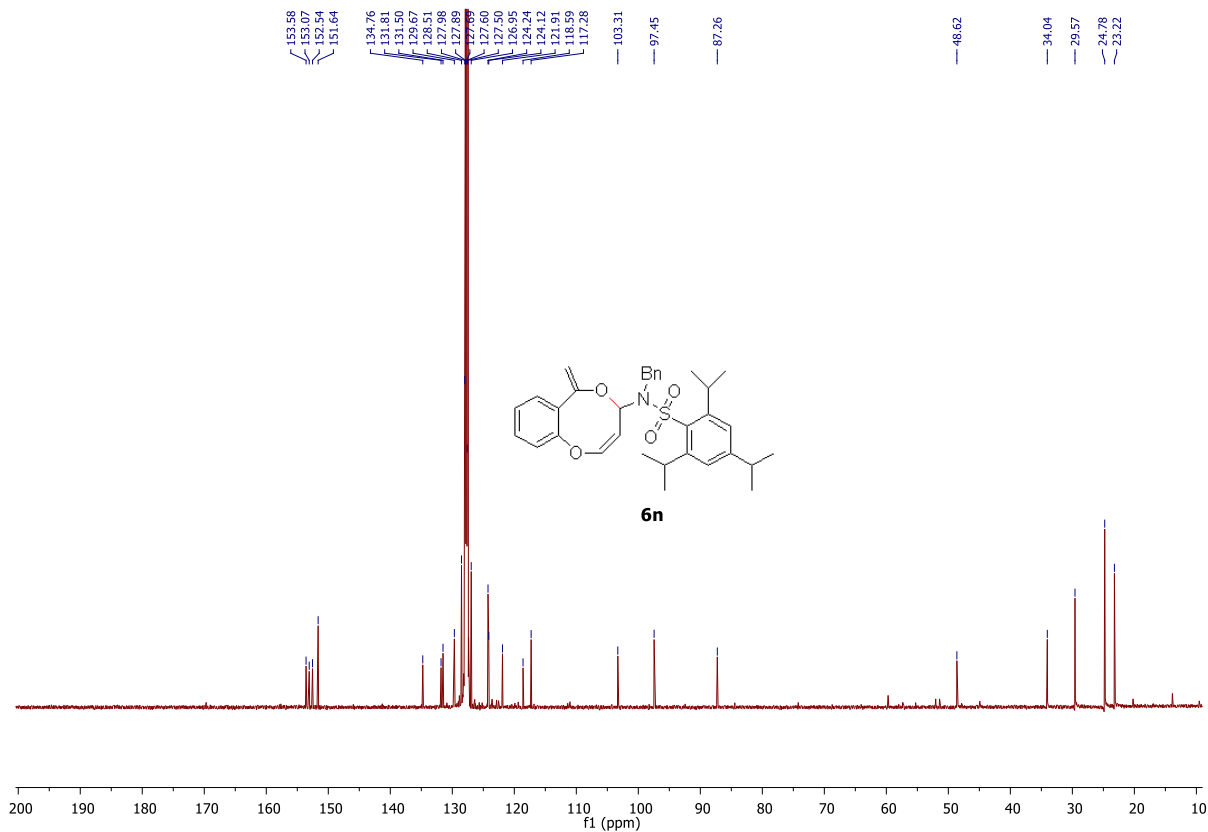

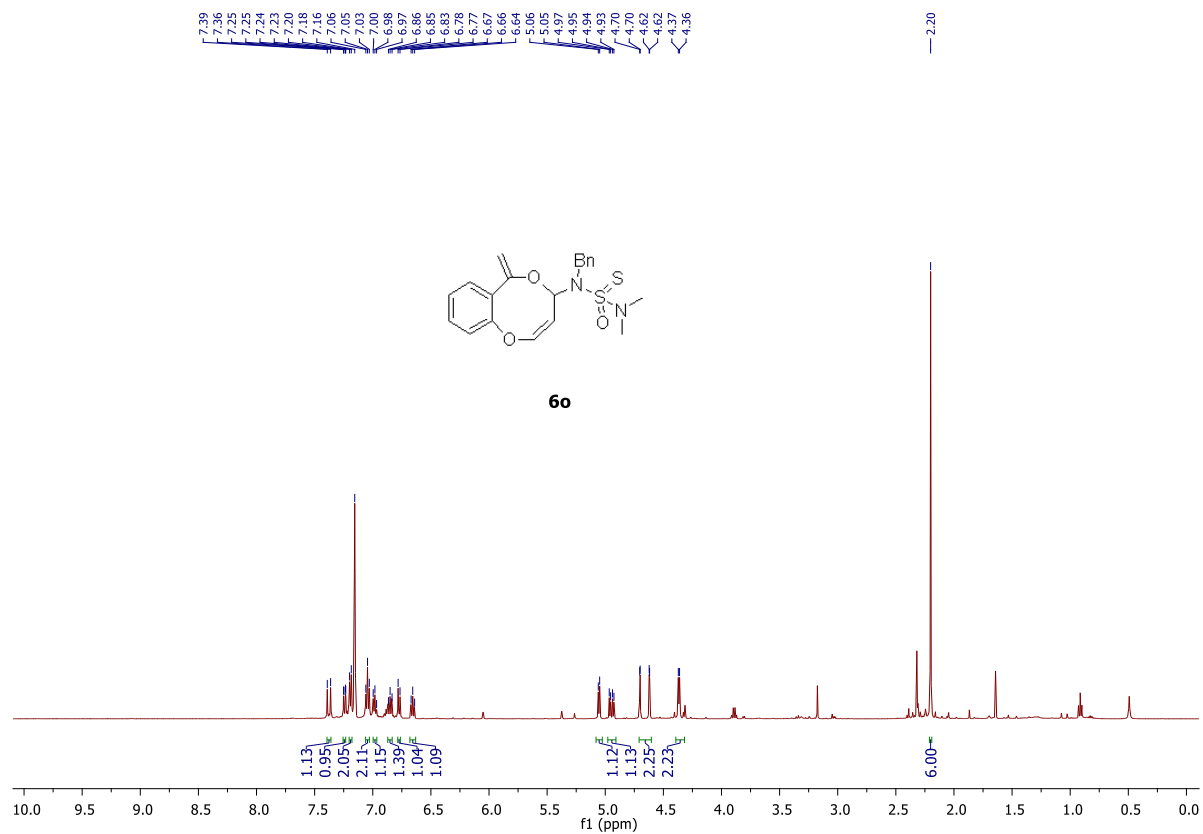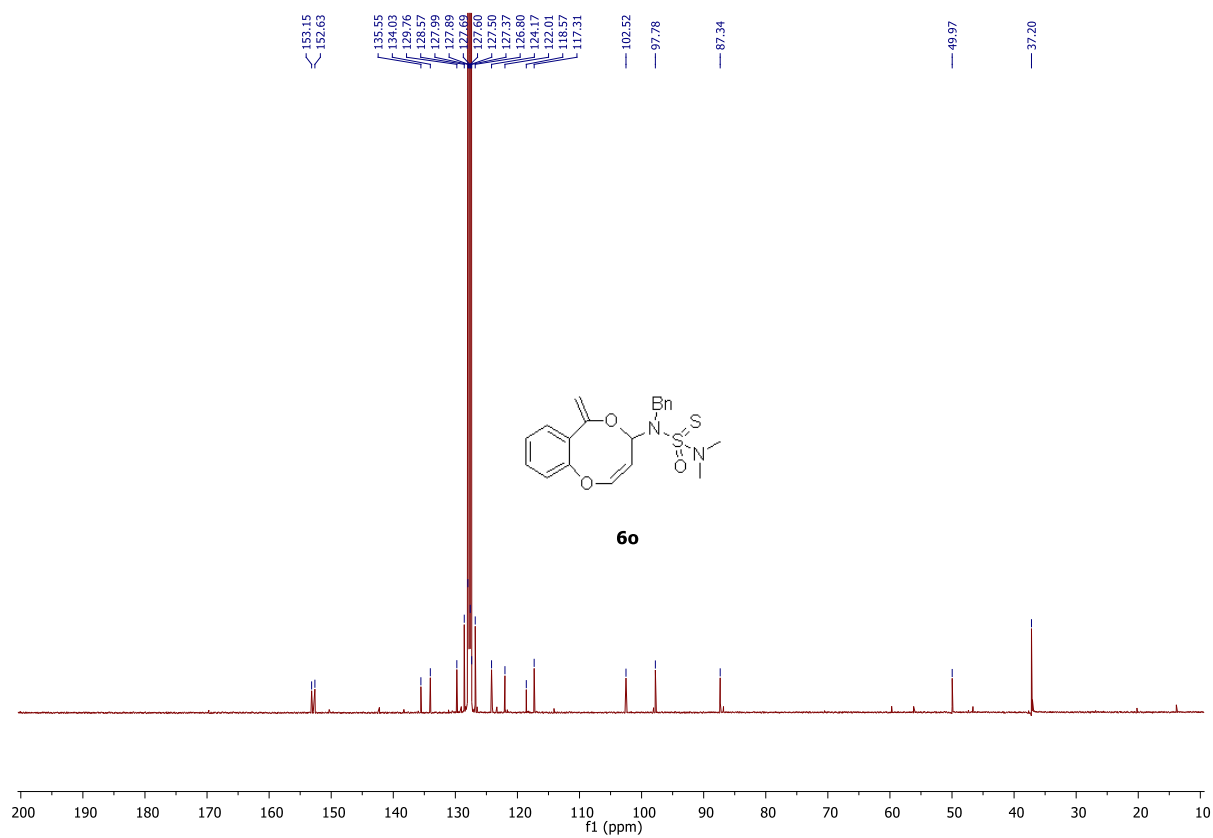

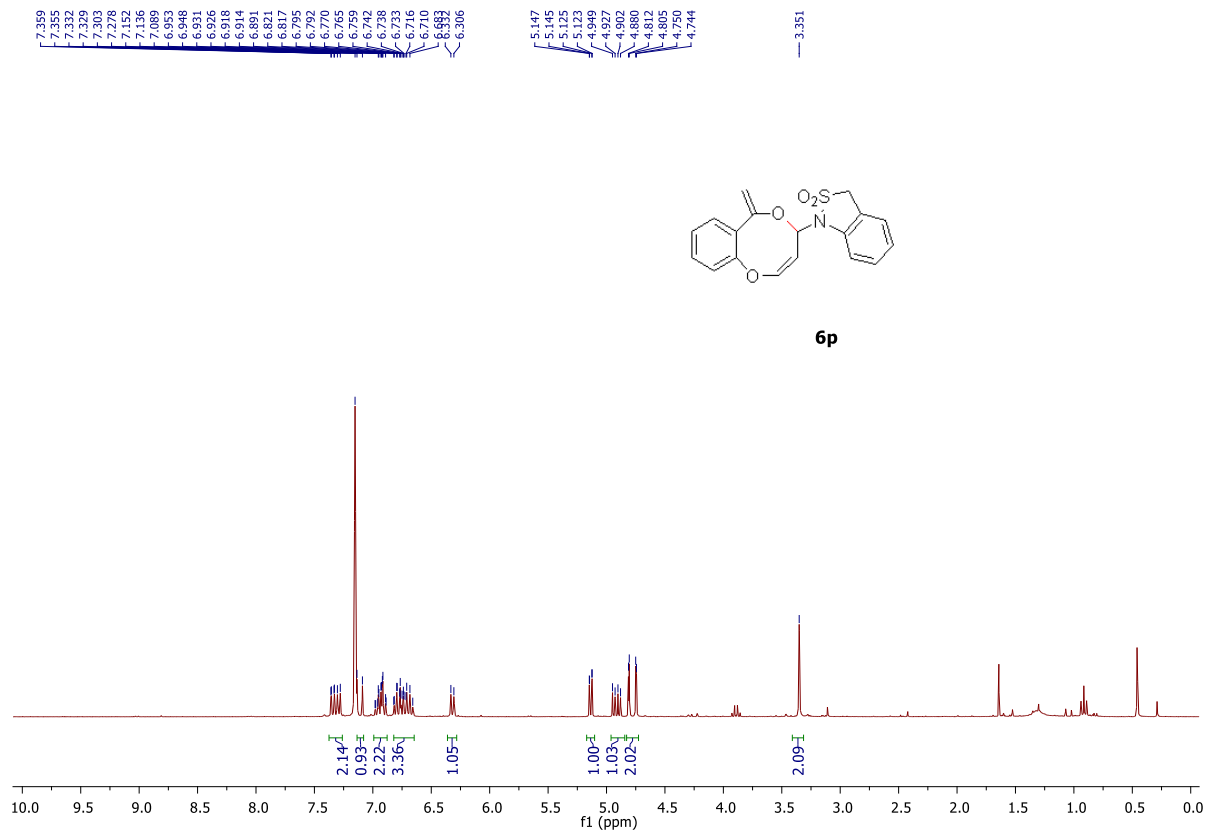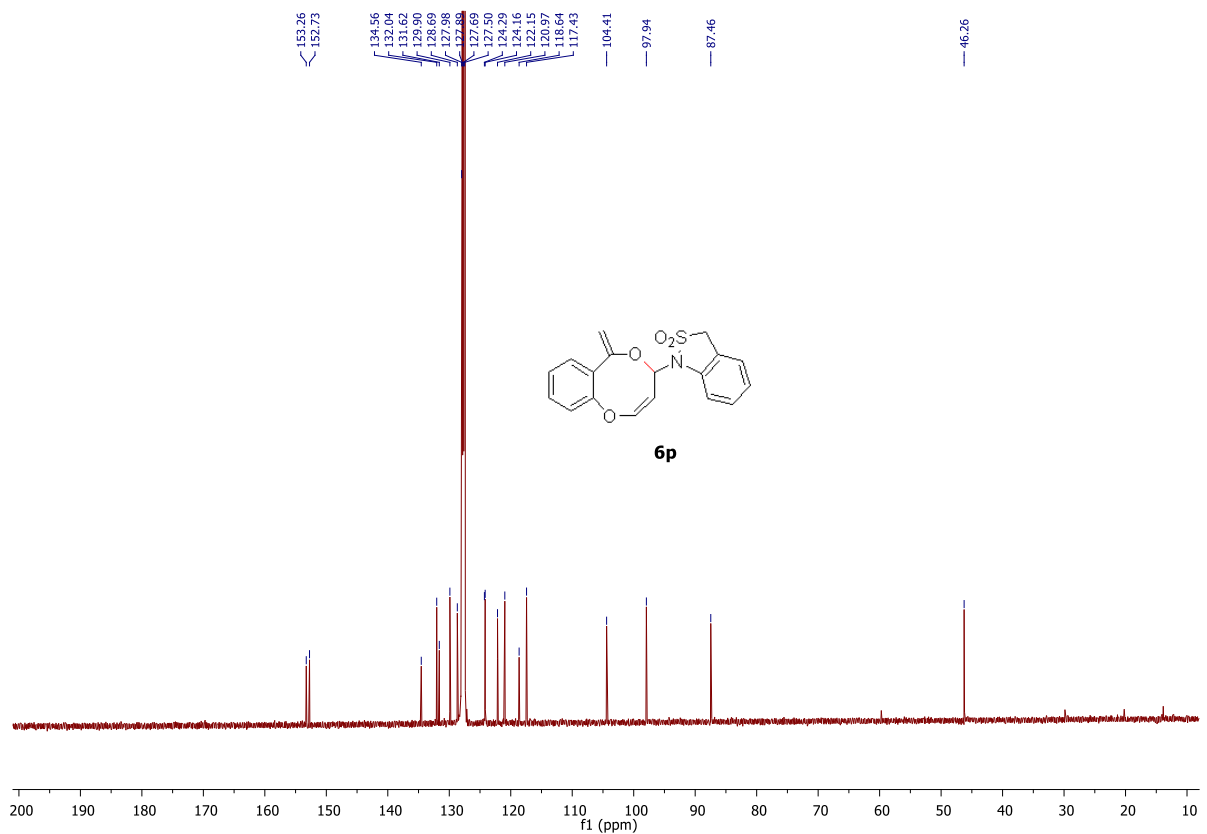

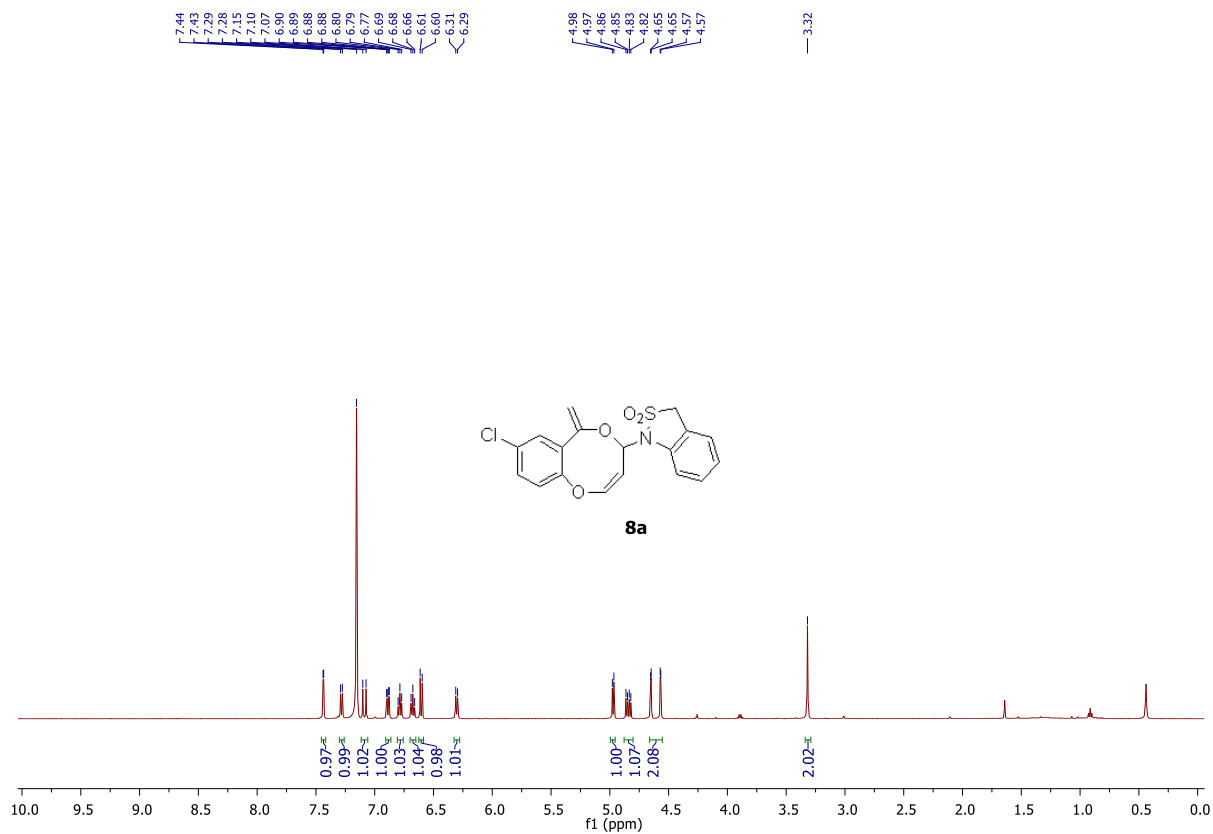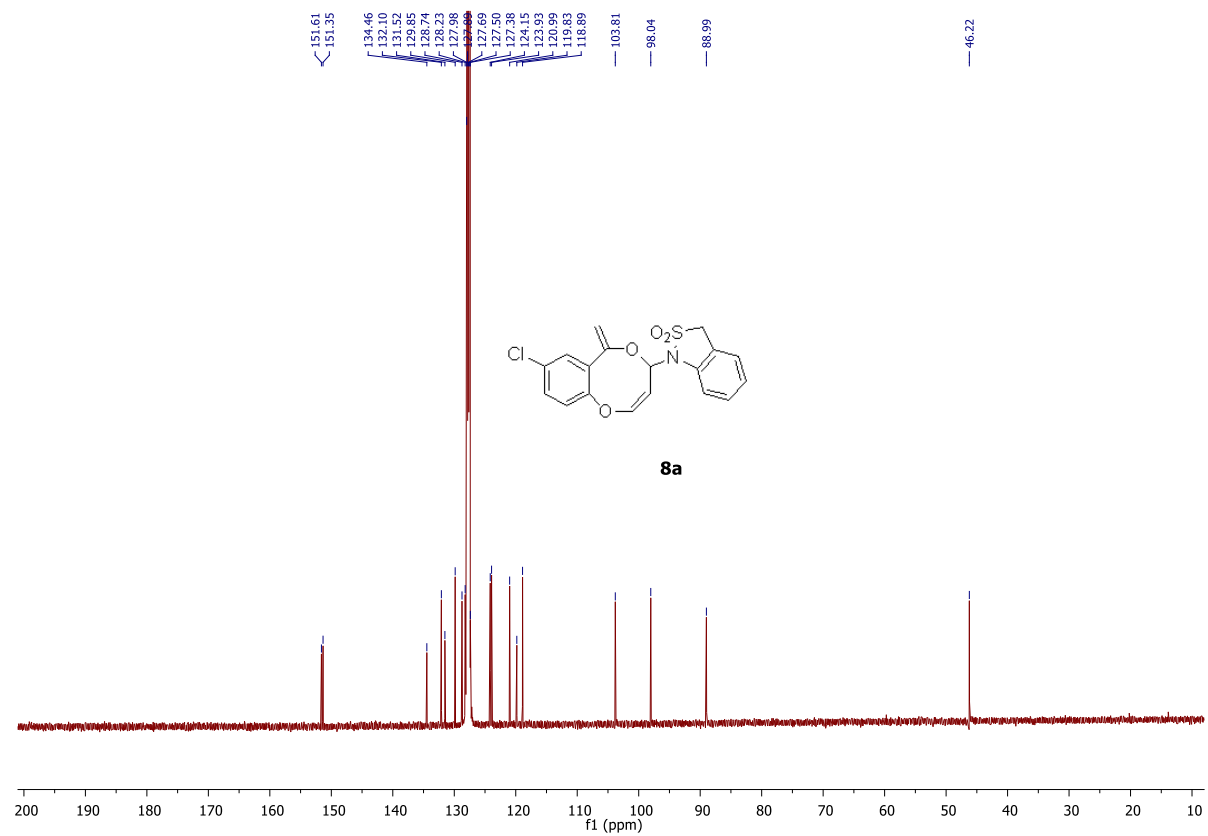



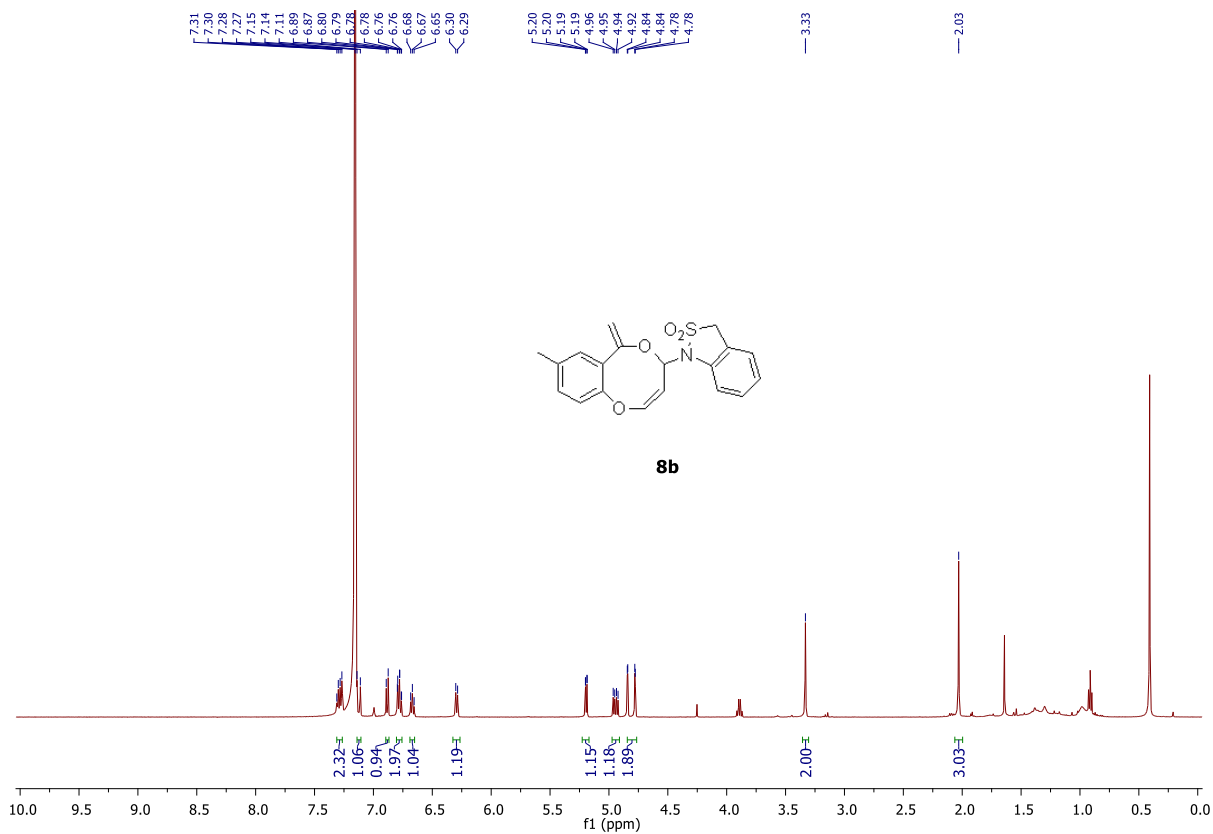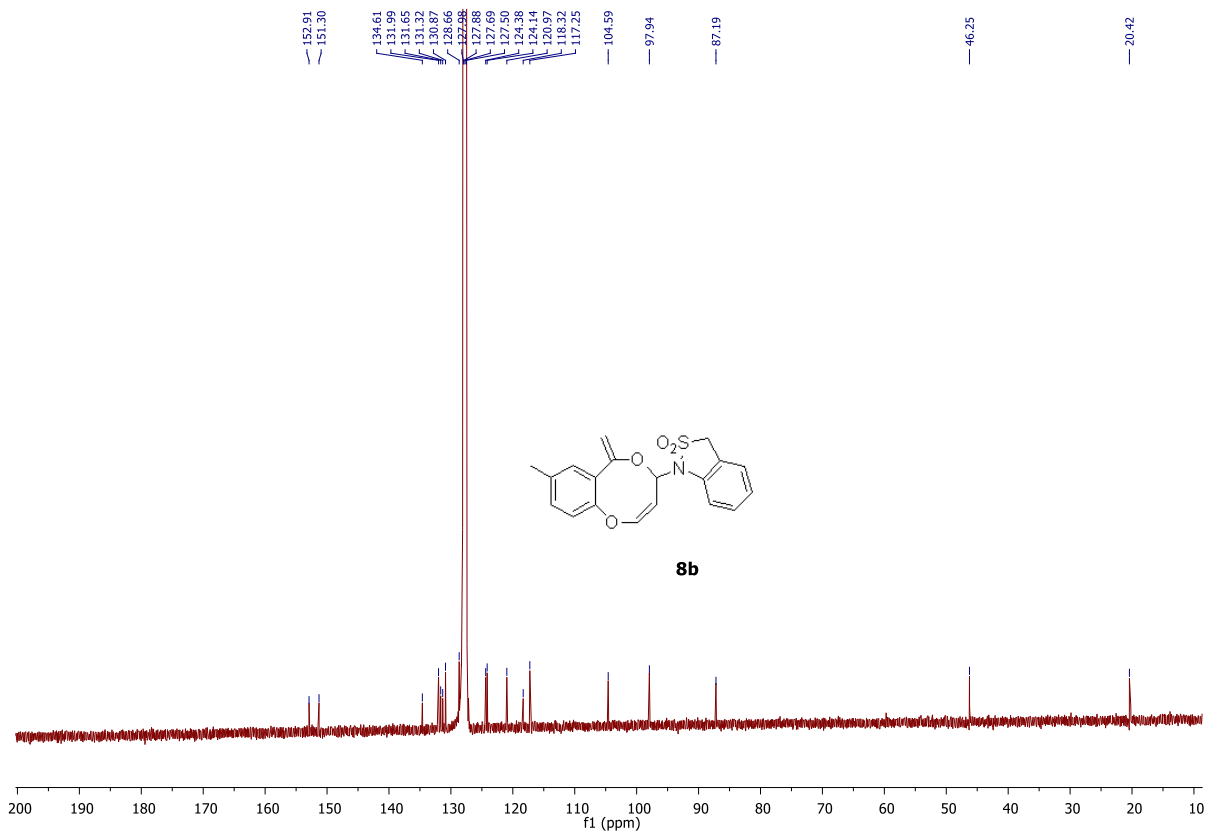

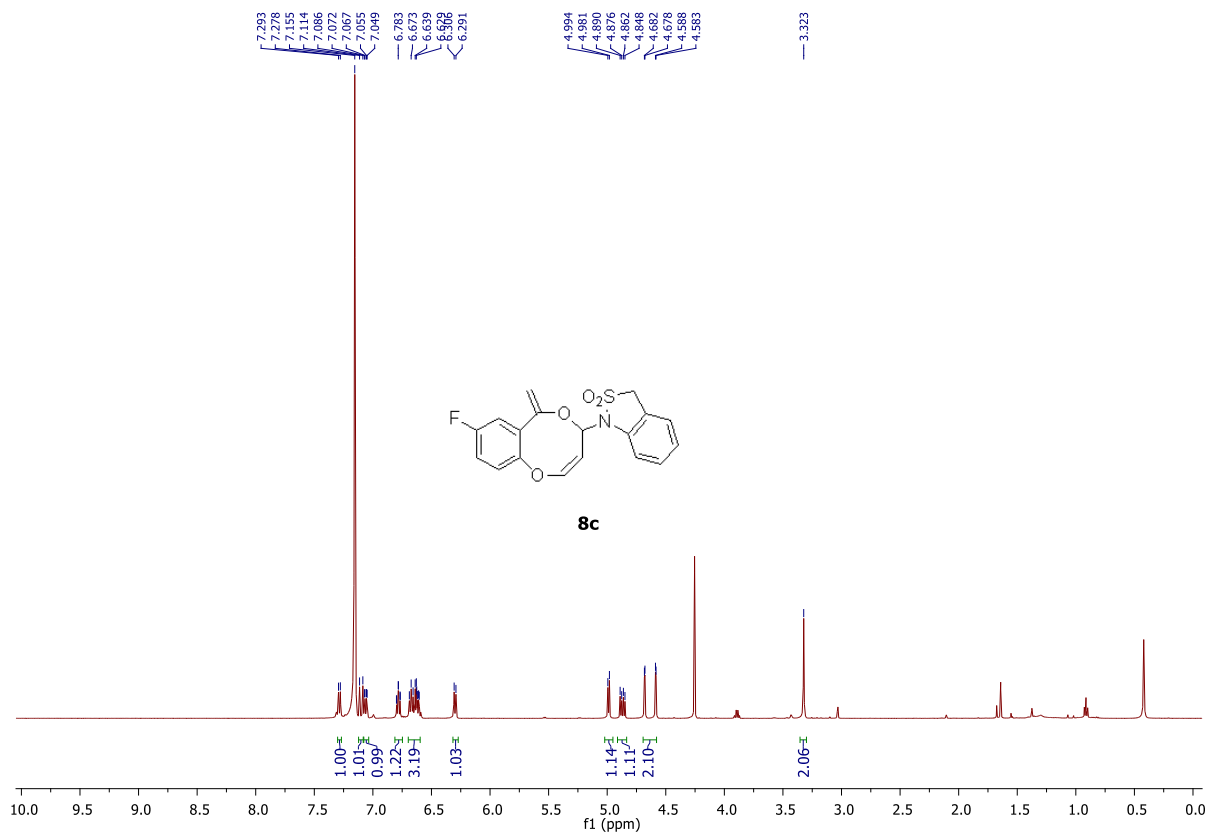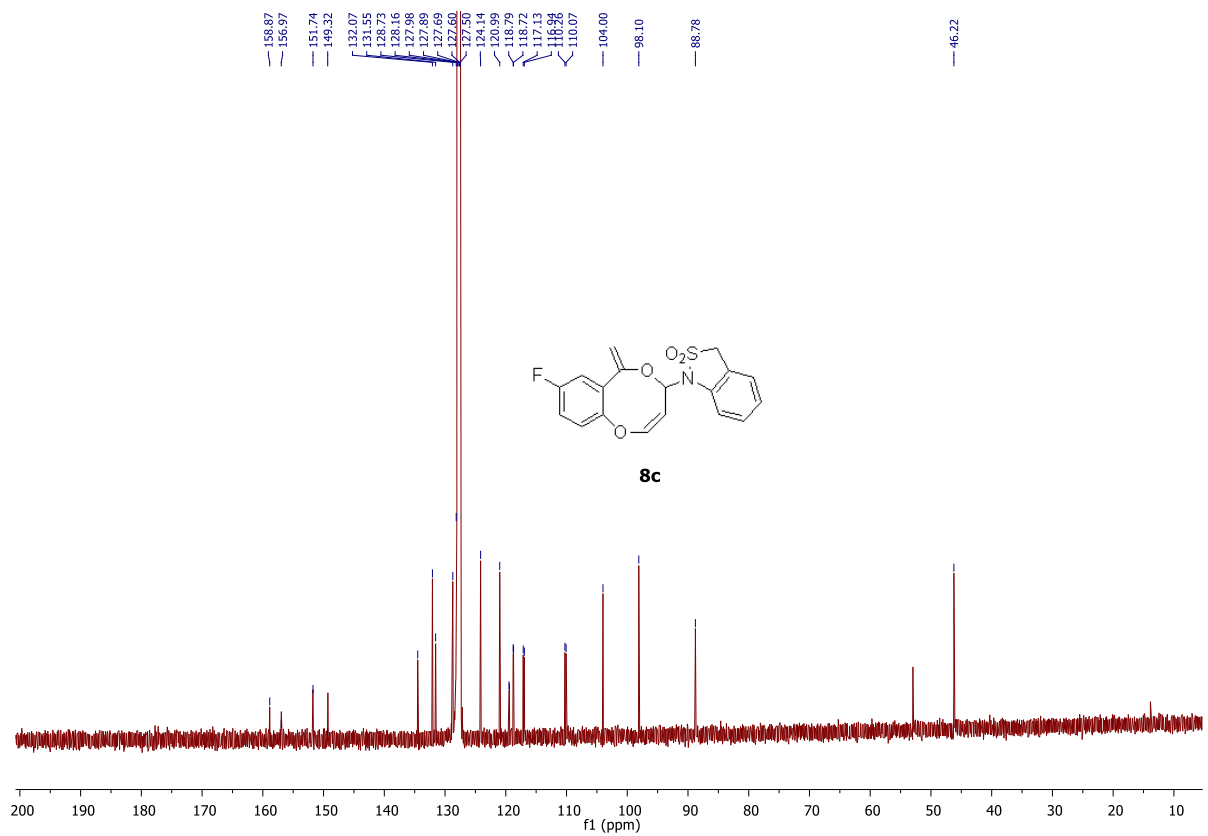

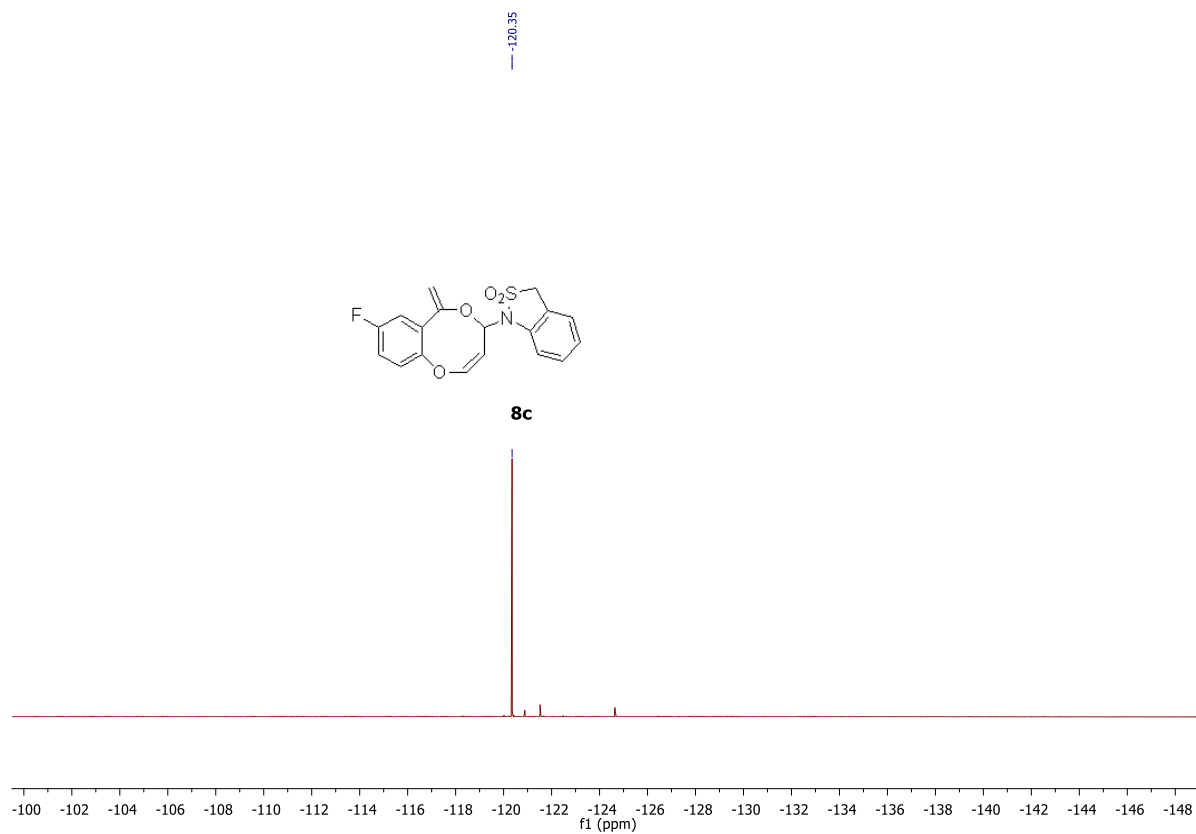

7.618  
7.579  
7.576  
7.559  
7.155  
7.133  
7.013  
6.999  
6.655  
6.494  
6.489  
6.482  
6.479  
6.472  
4.939  
4.928  
4.909  
4.898  
4.881  
4.870  
4.519  
4.515  
4.498  
4.494  
4.290  
4.258  
4.235  
4.202

— 1.840

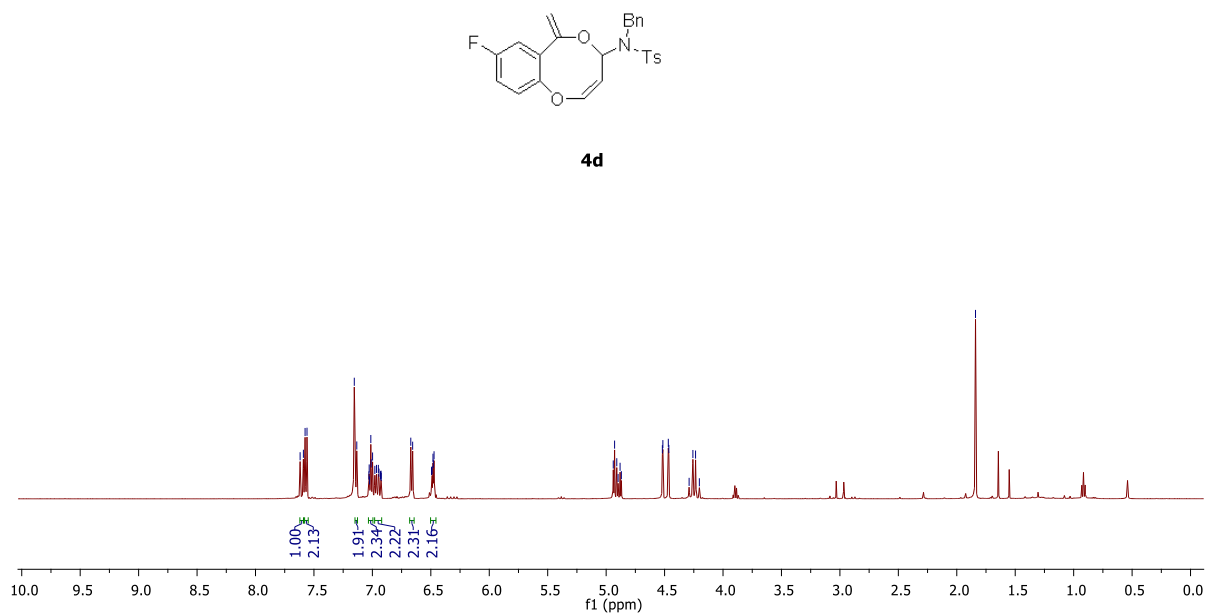

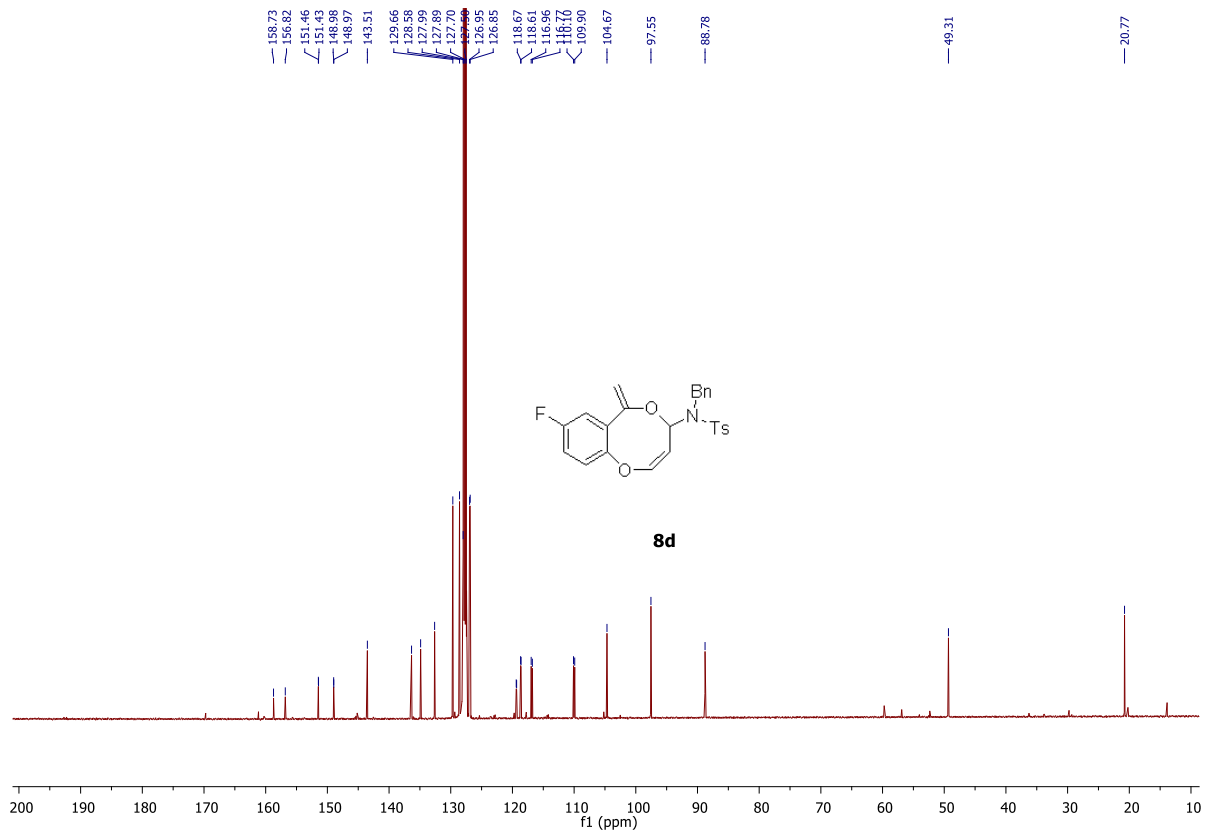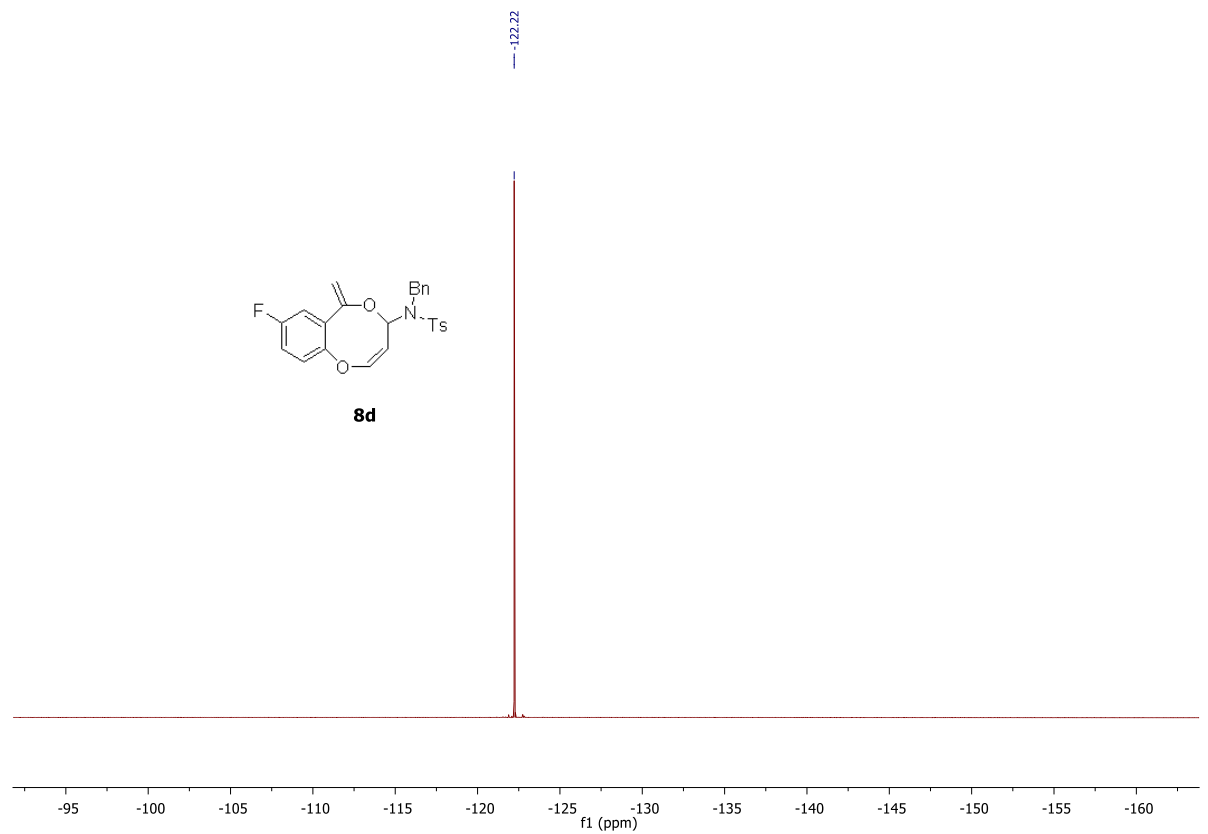

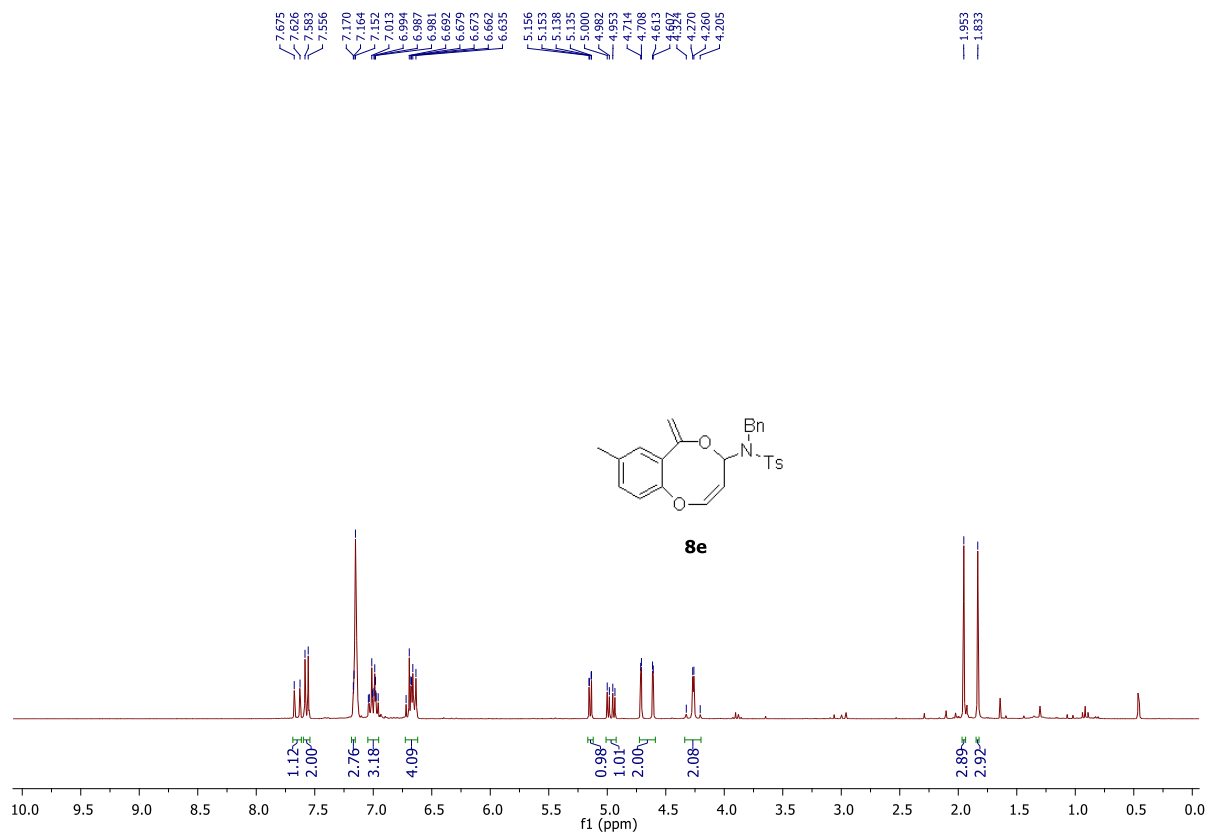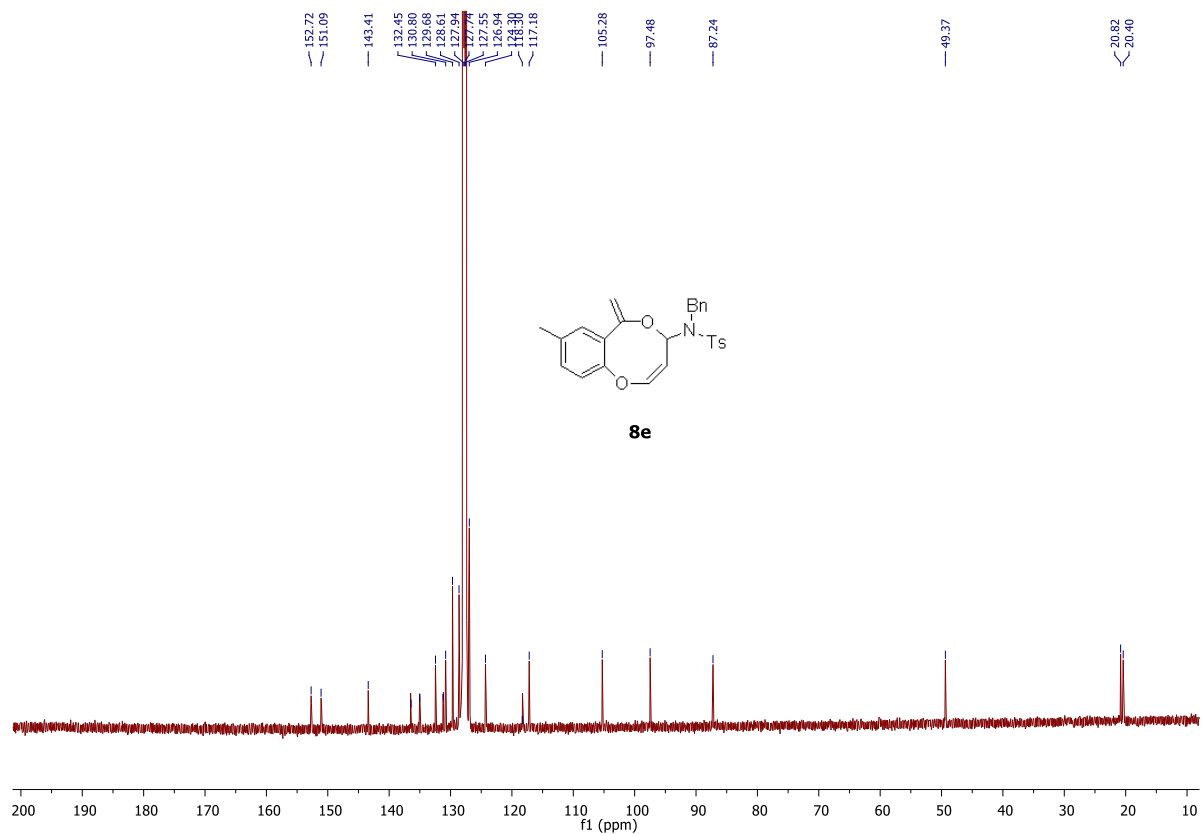

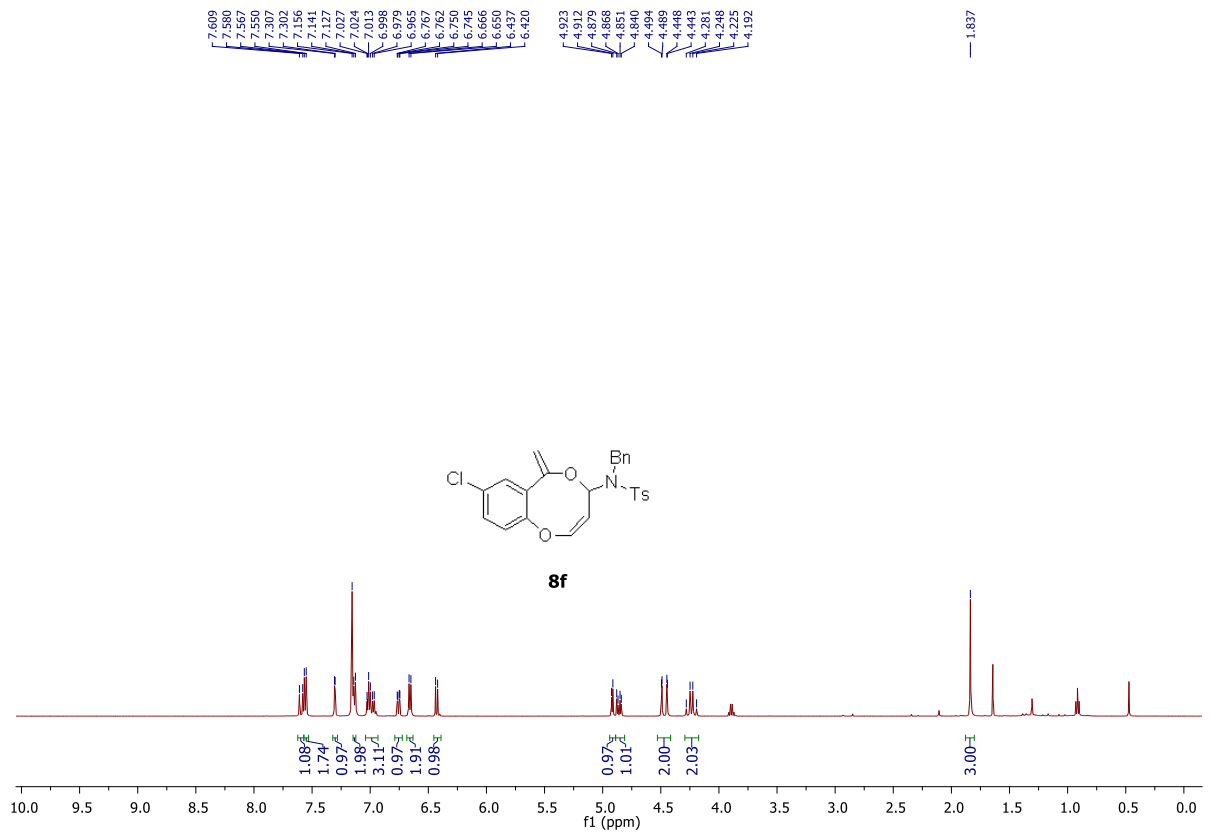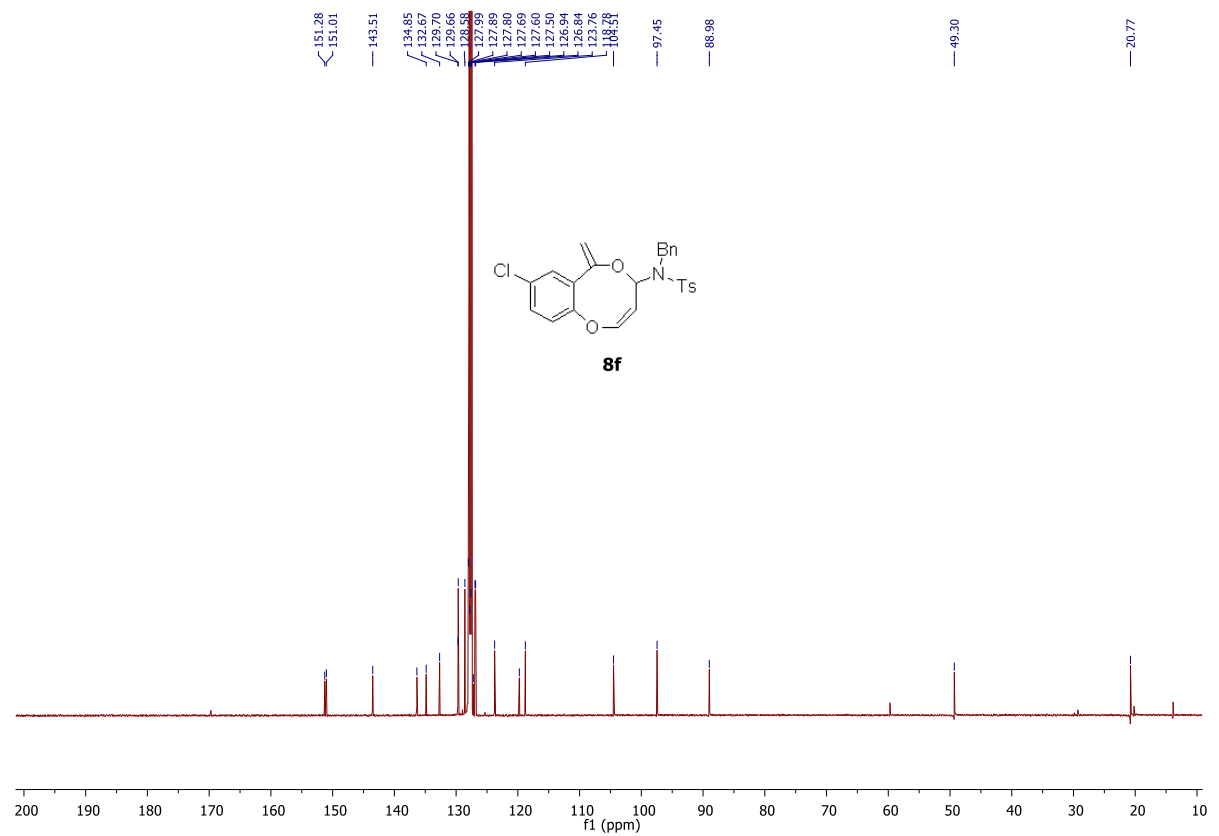

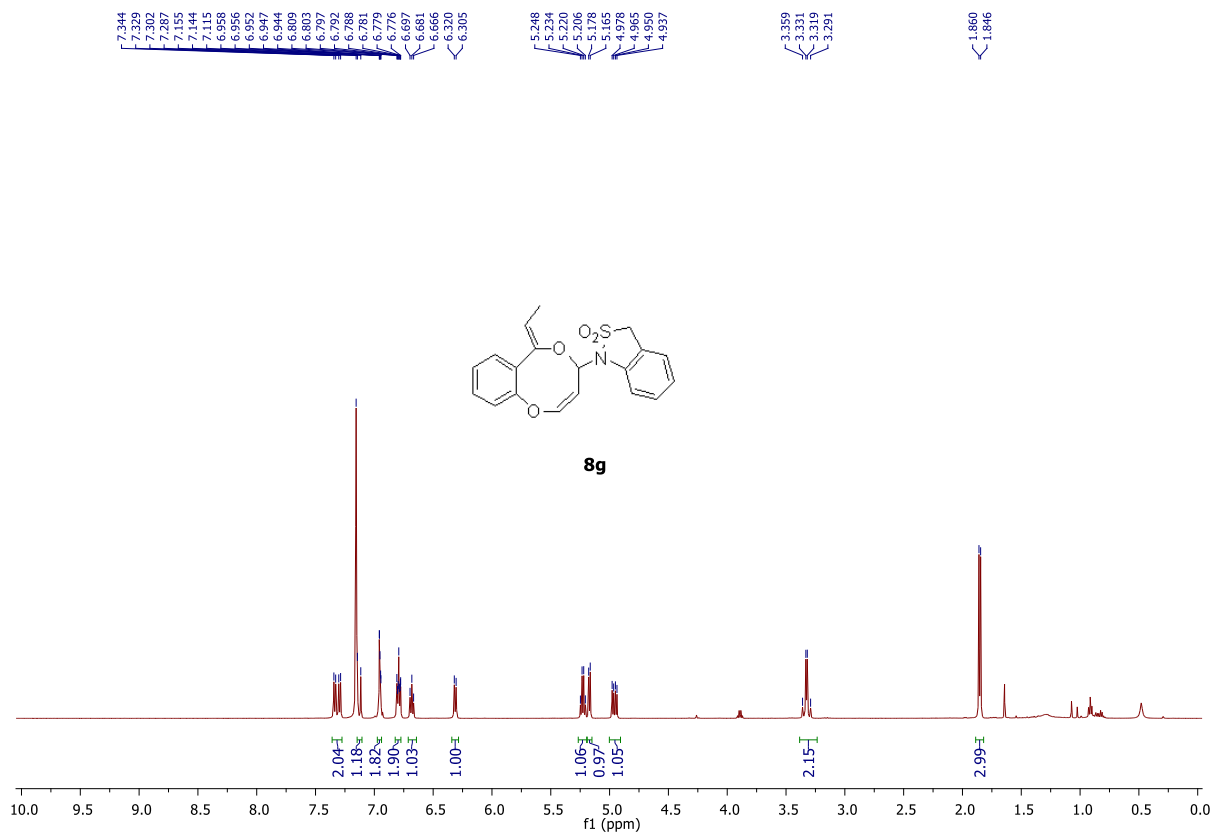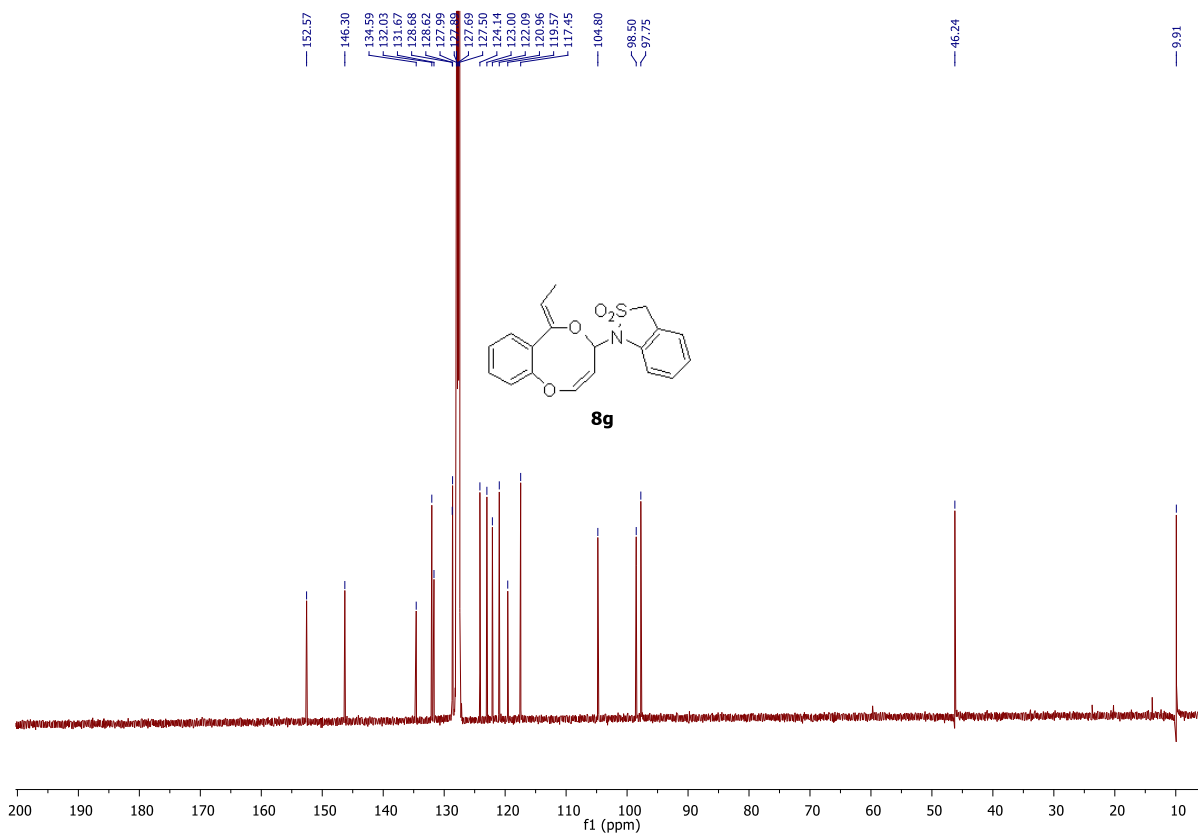

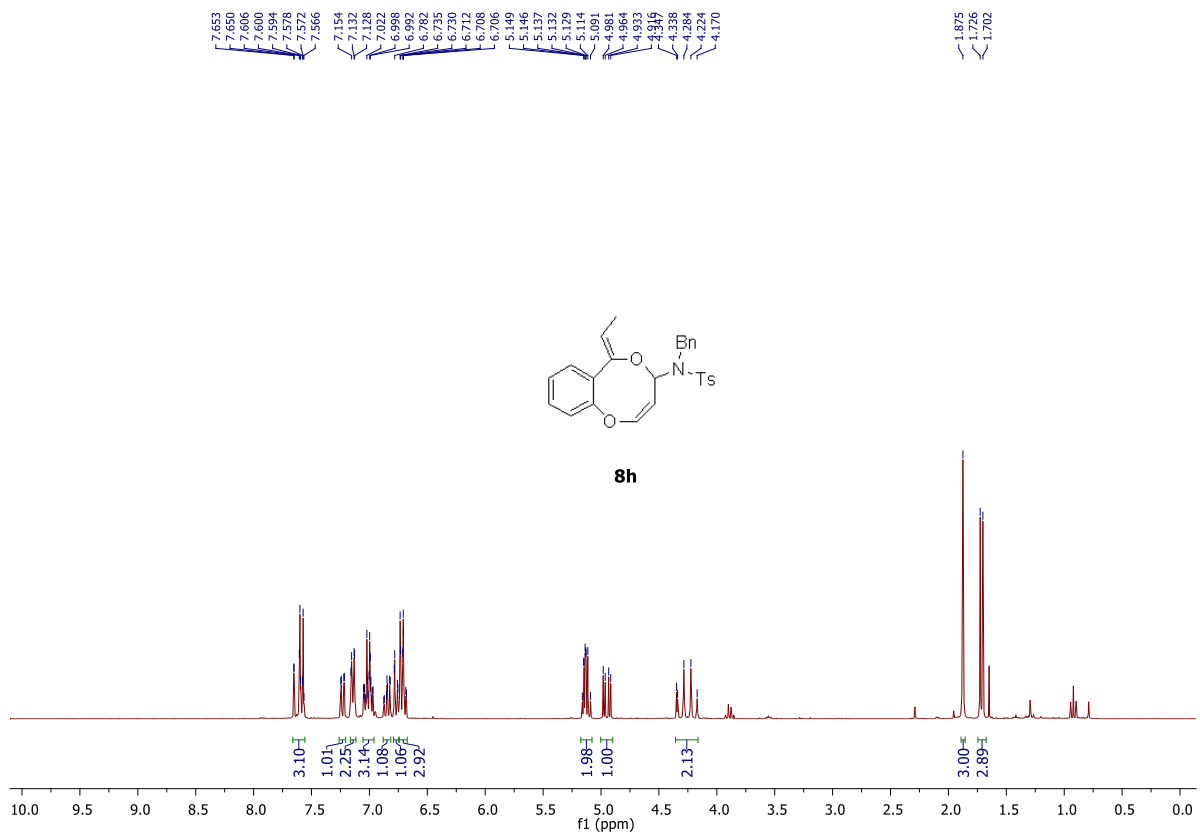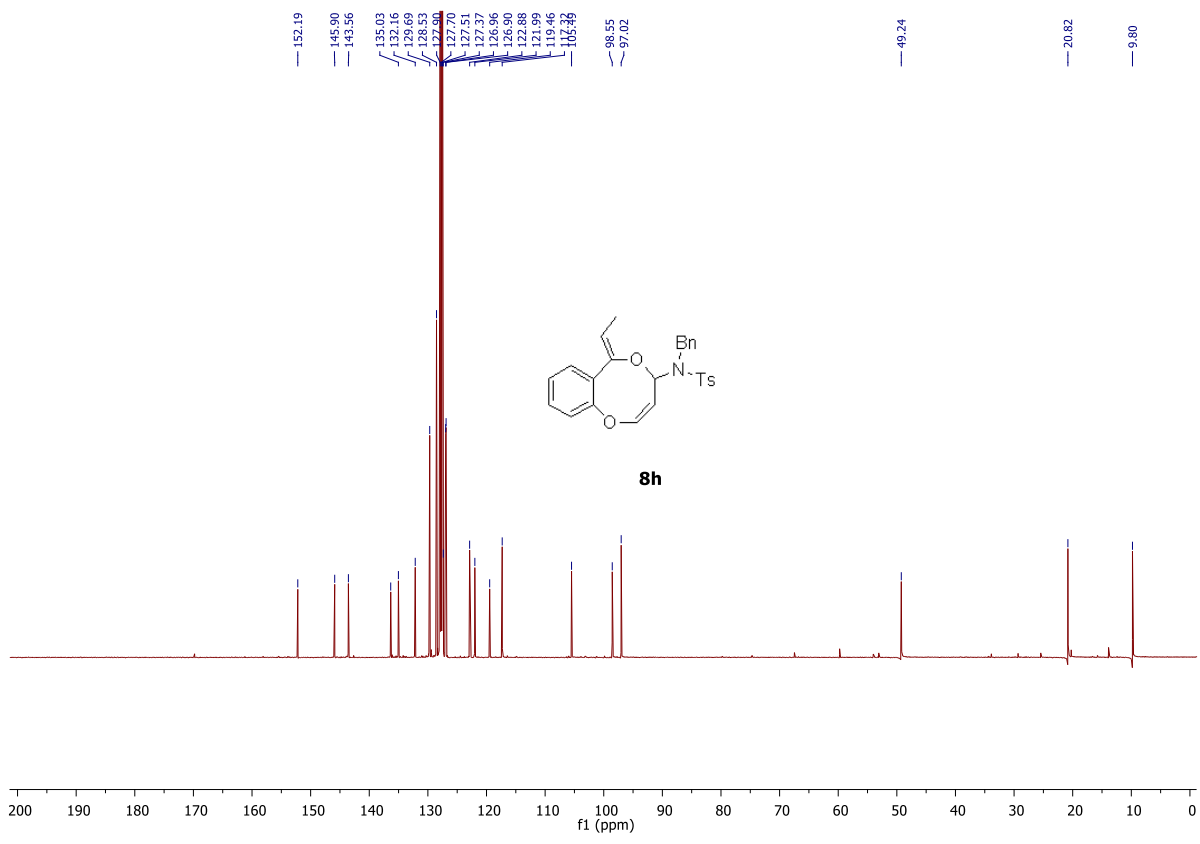



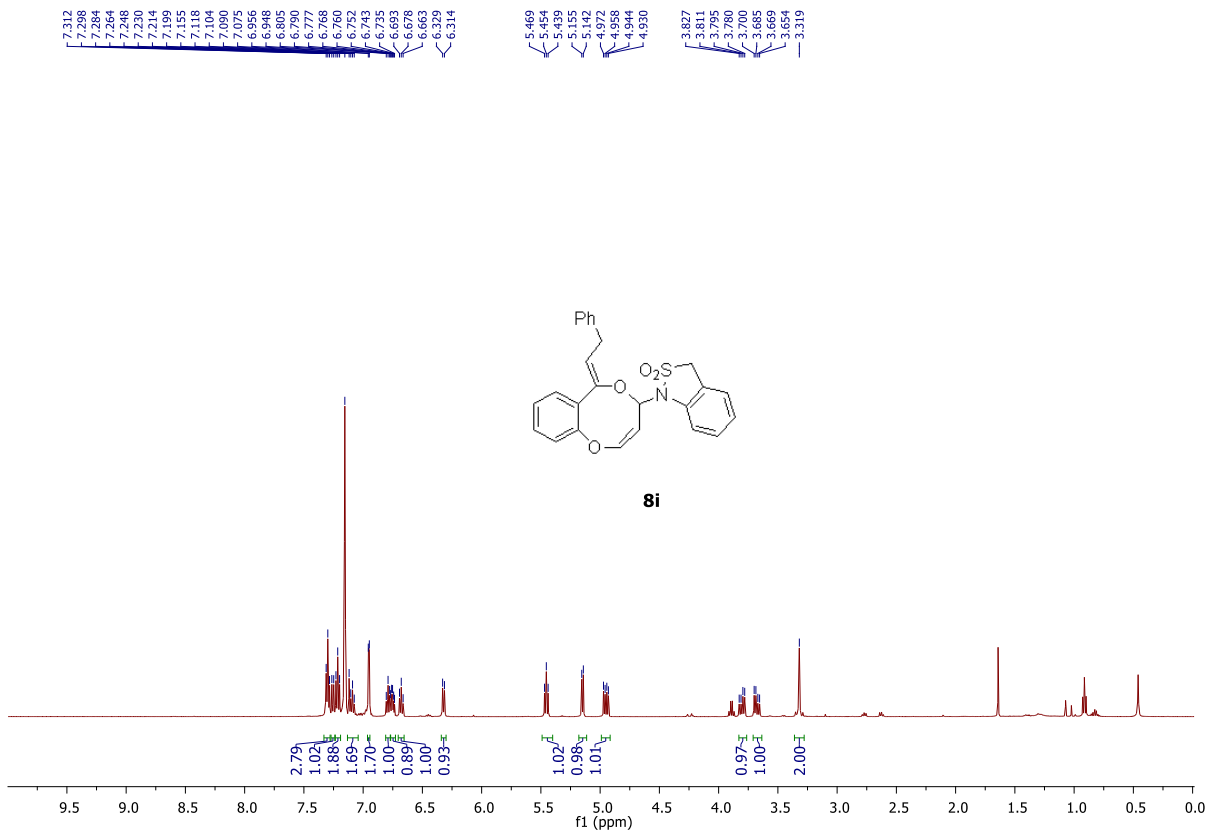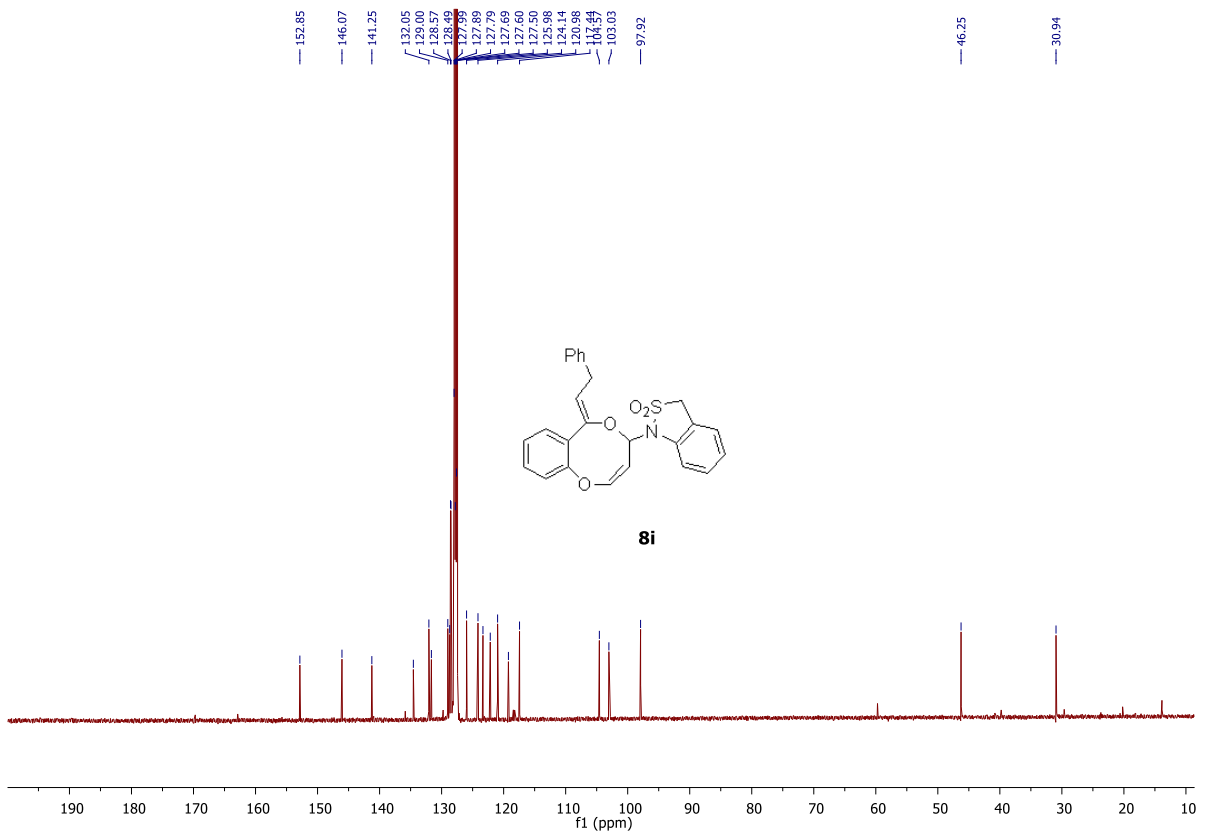

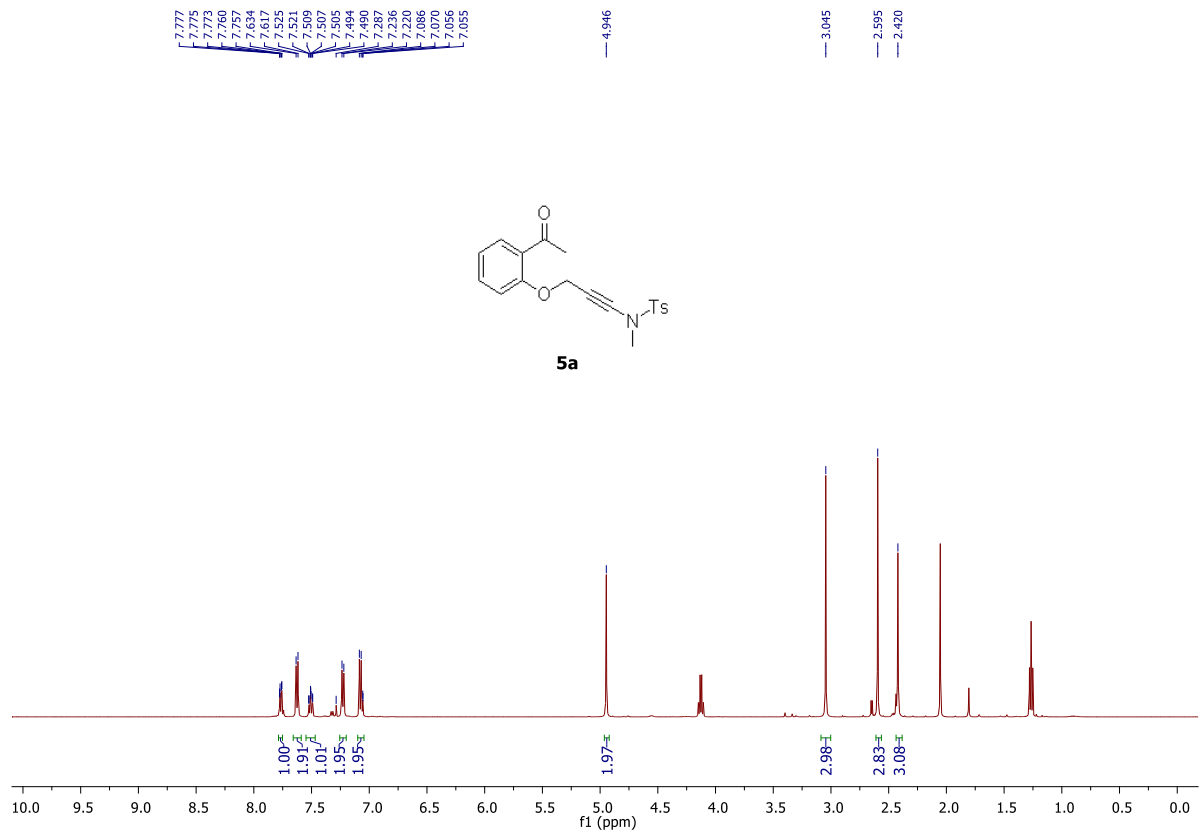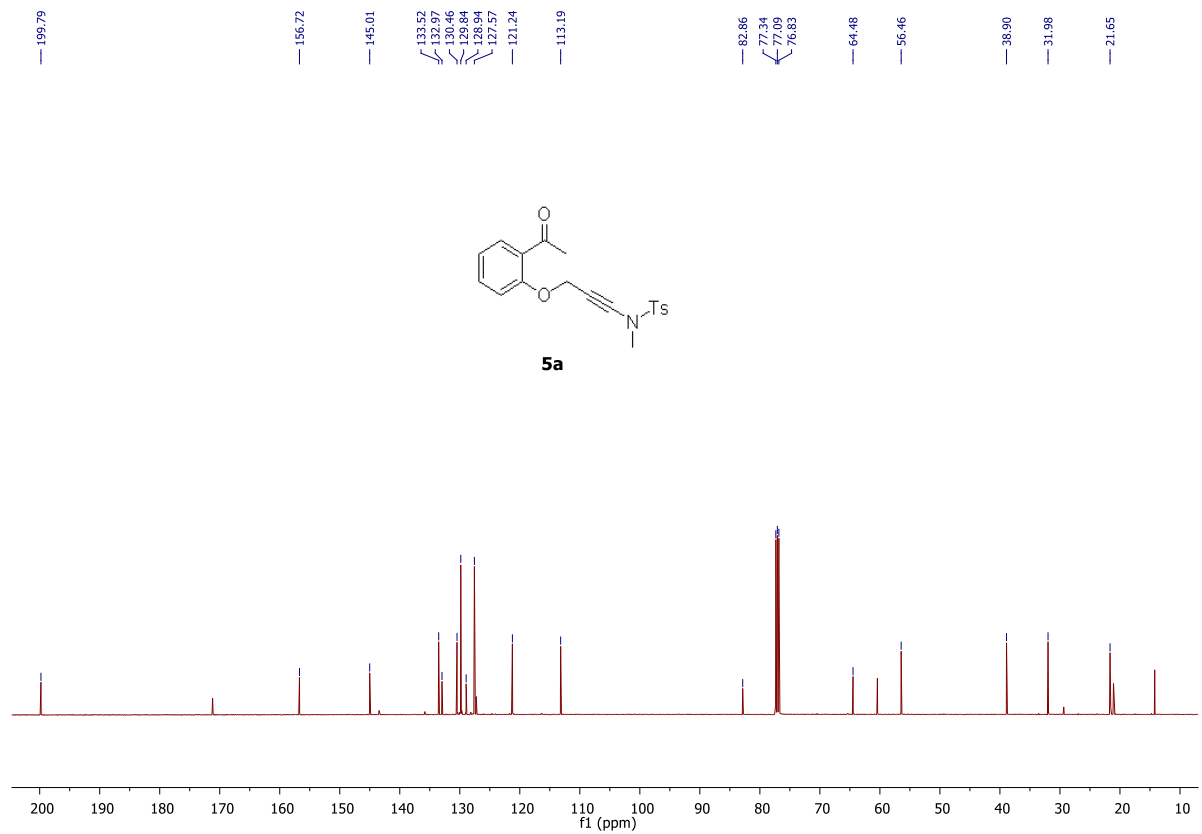

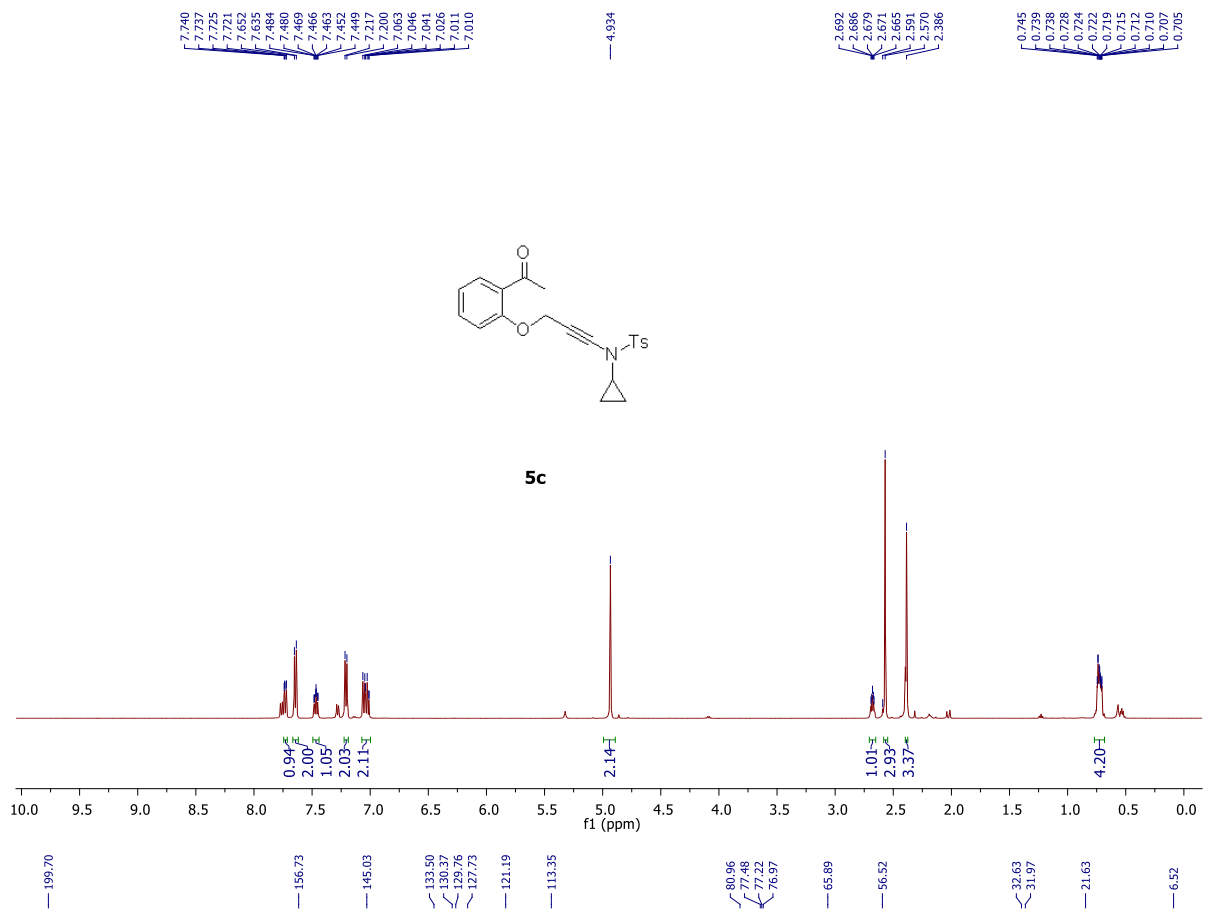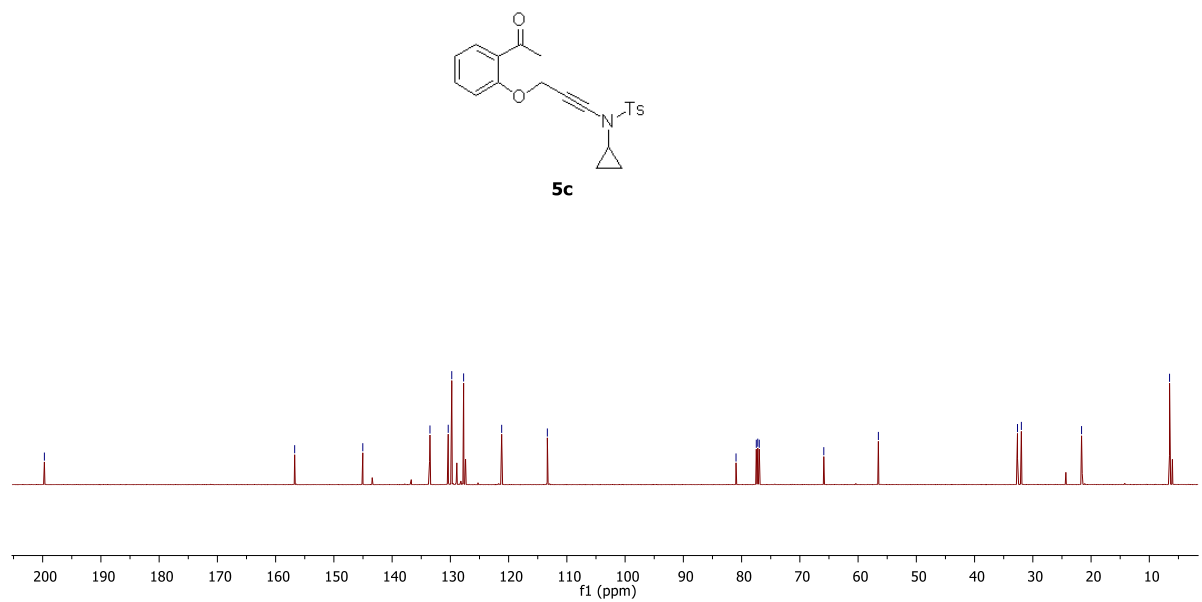

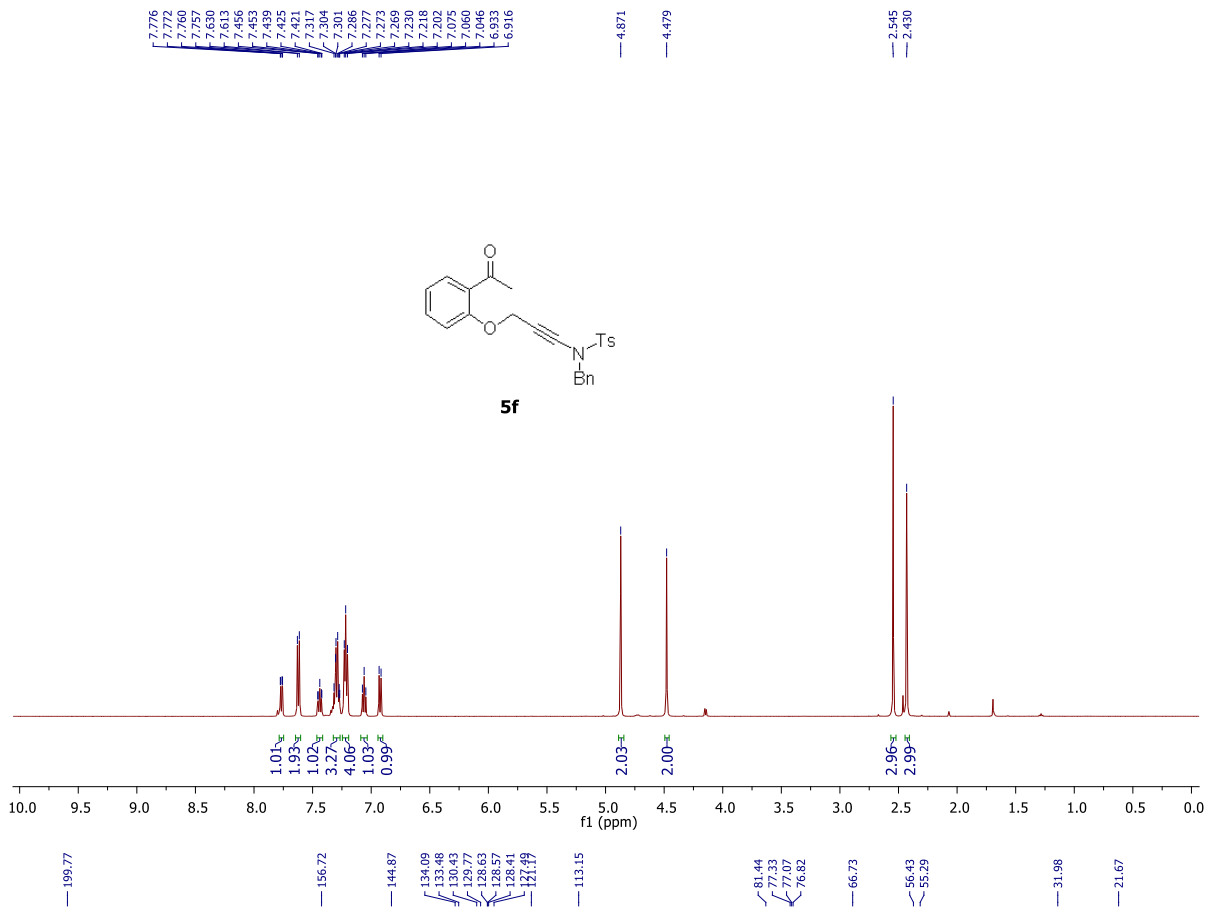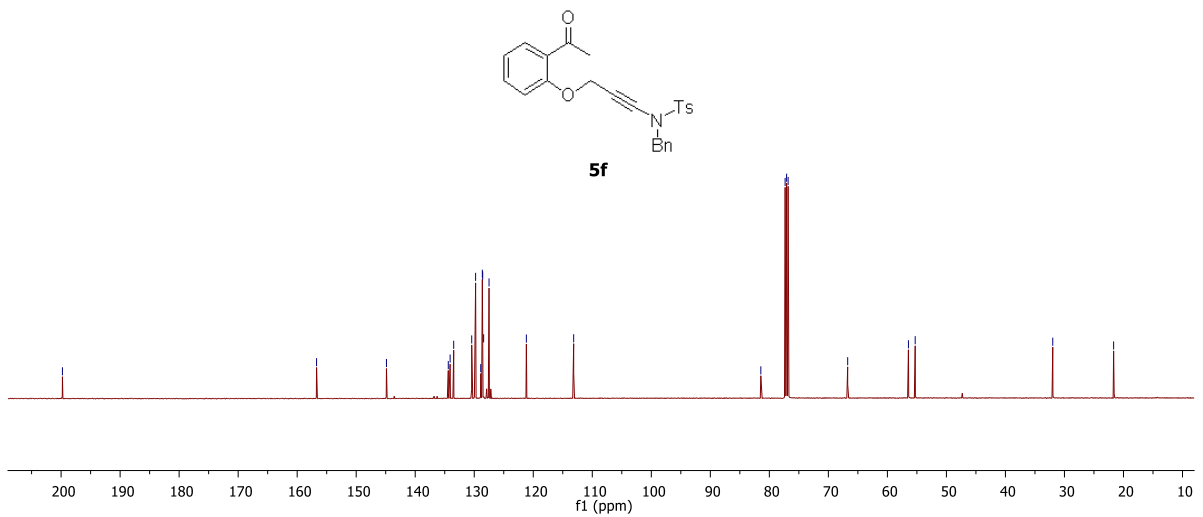

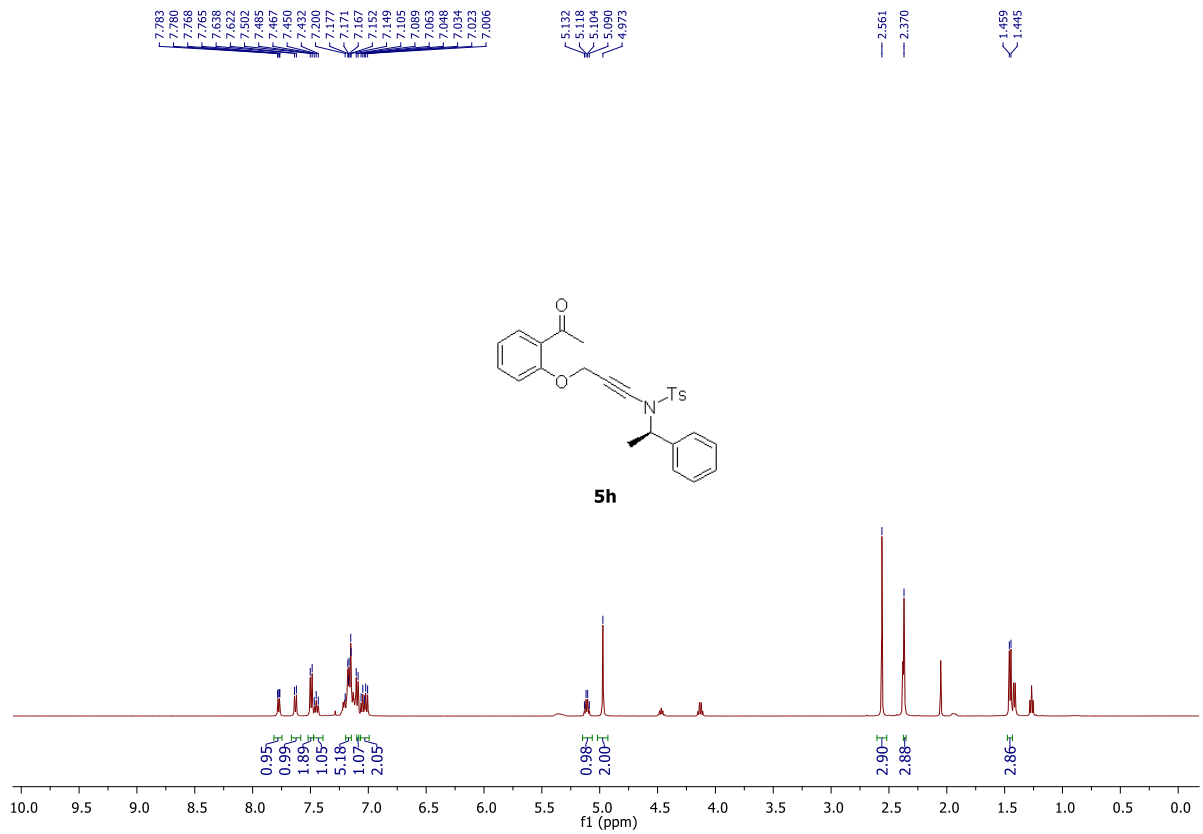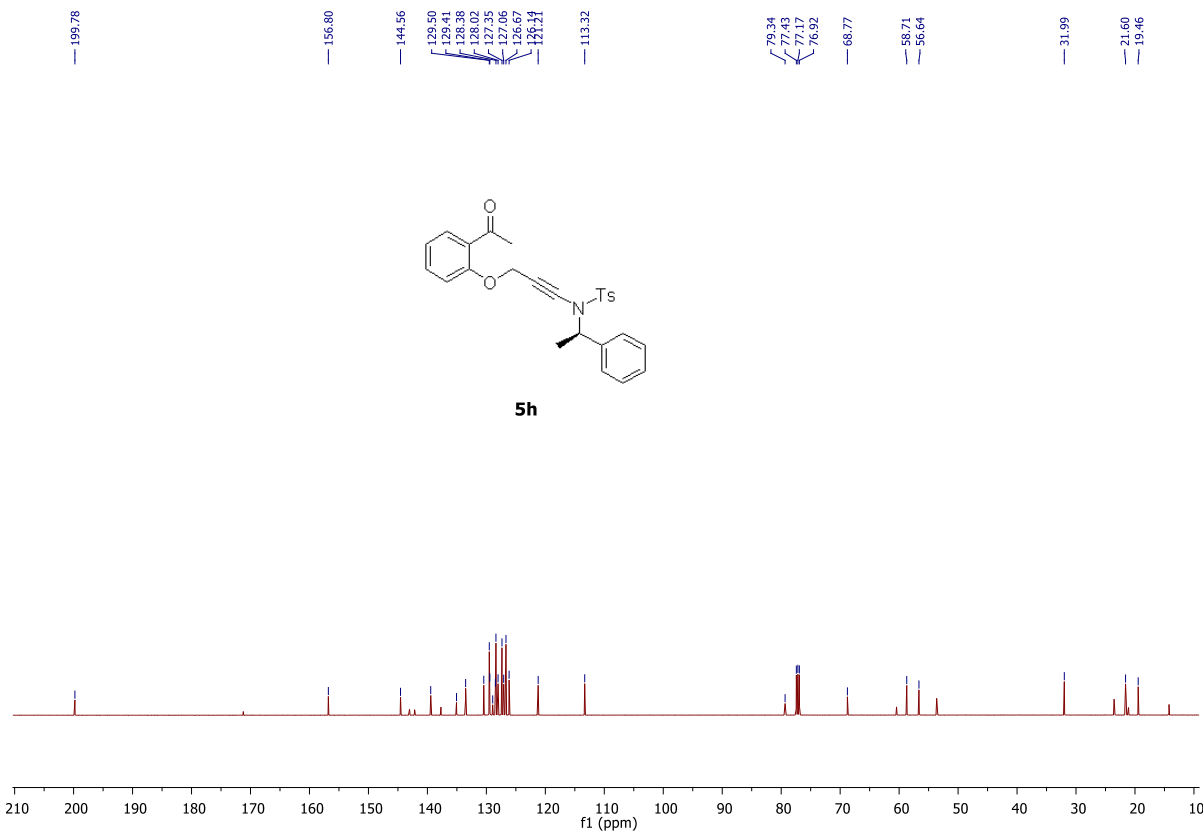

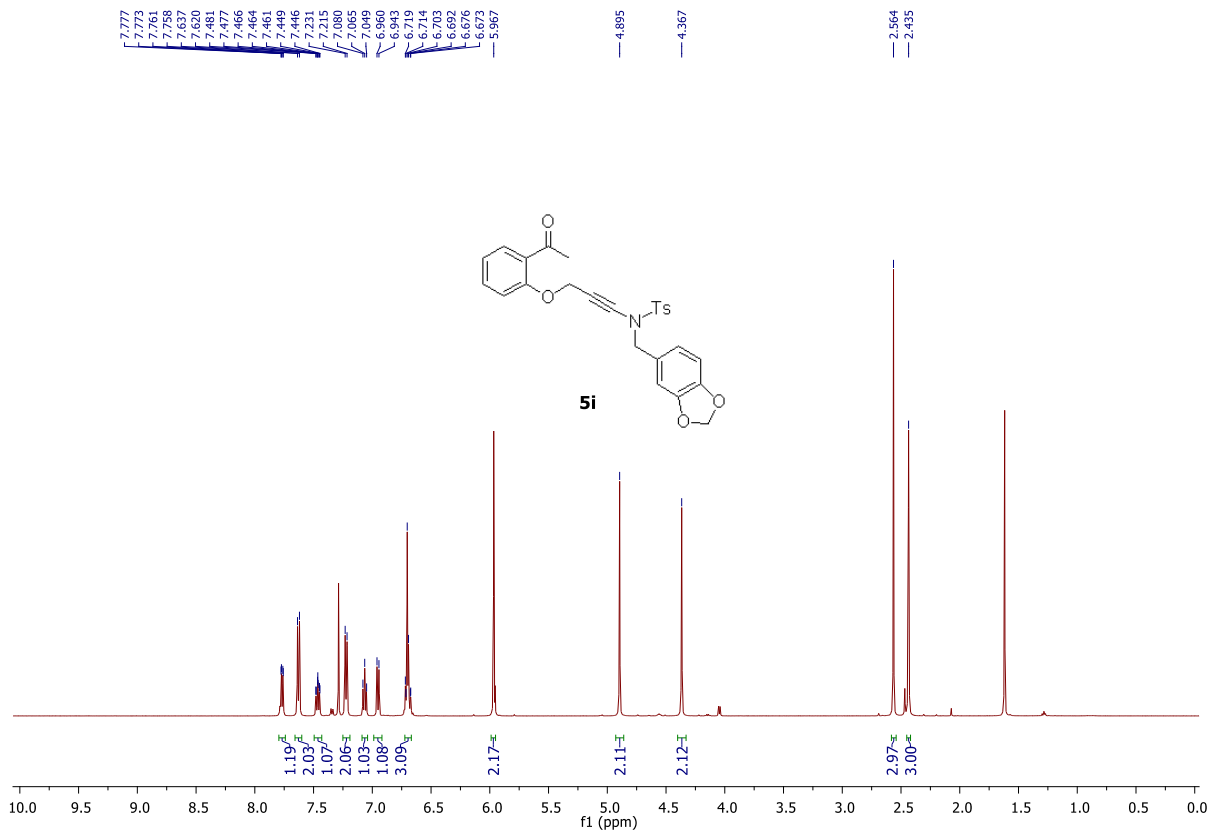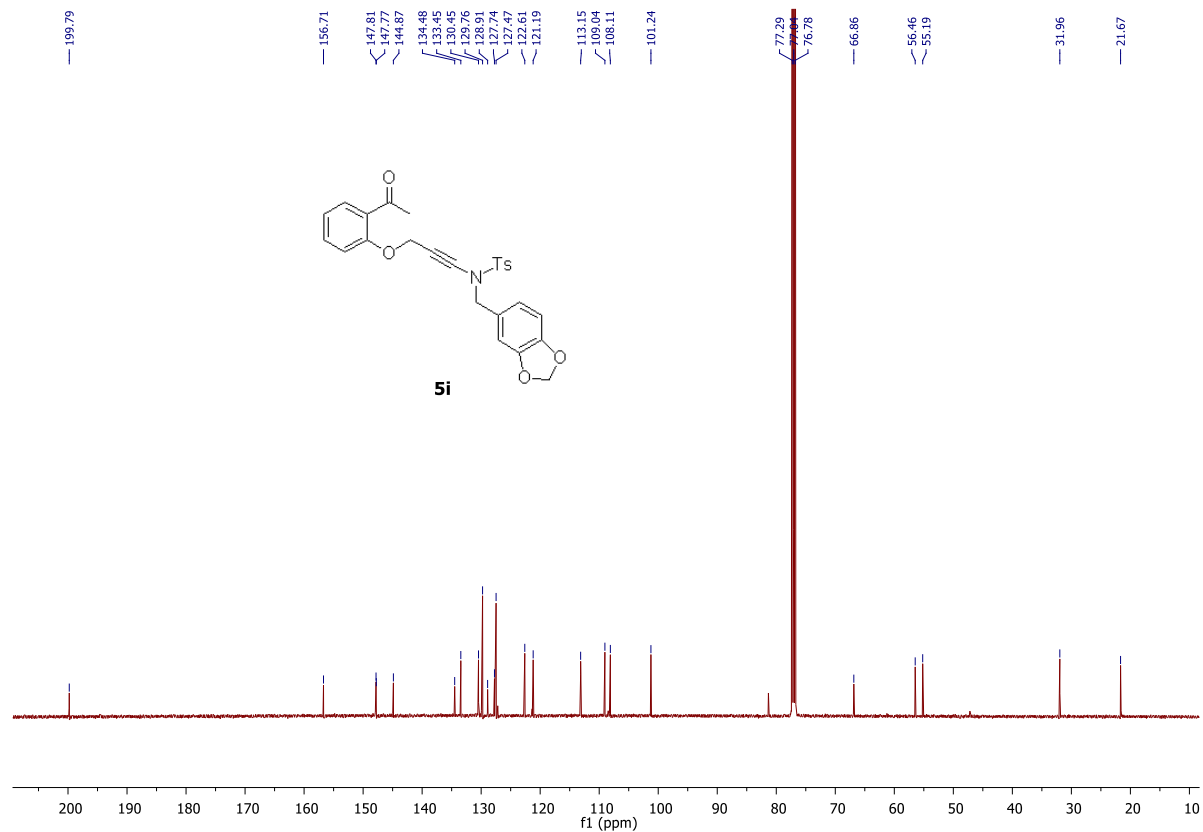

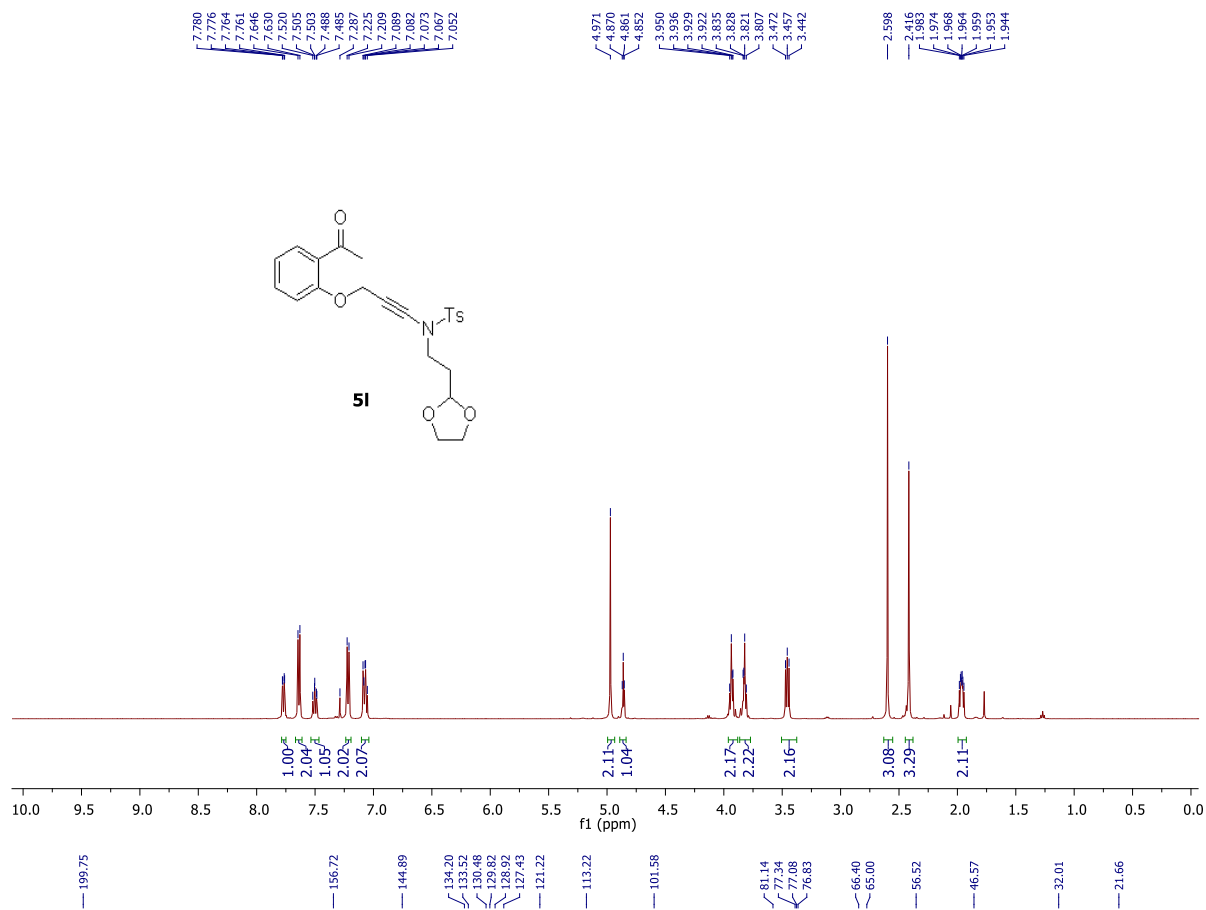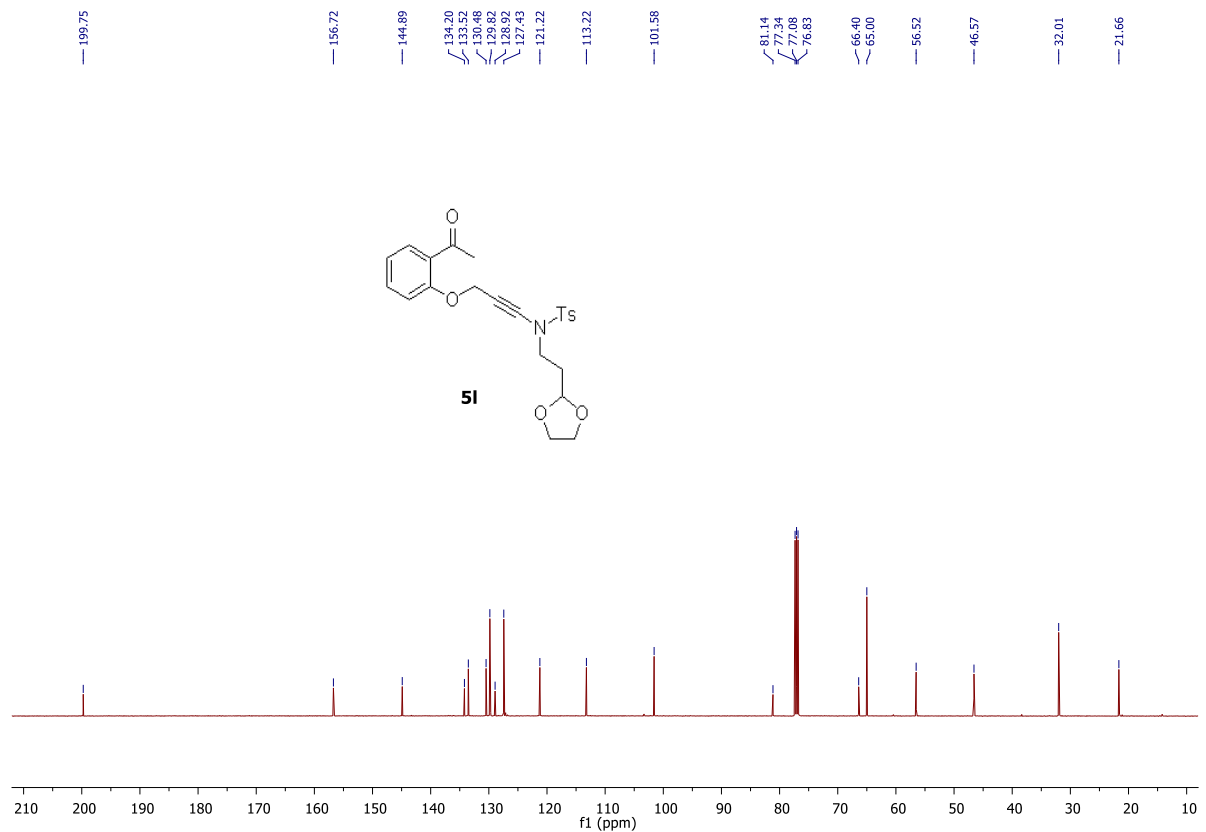

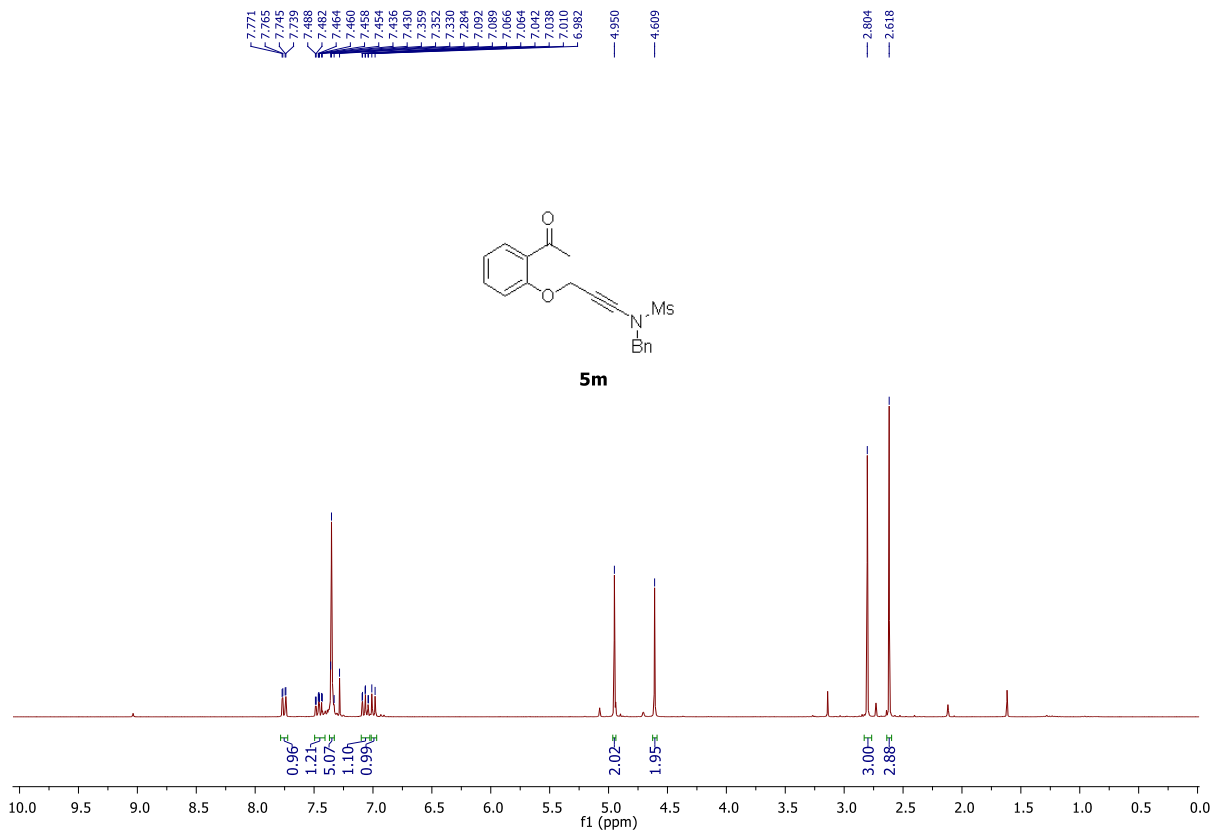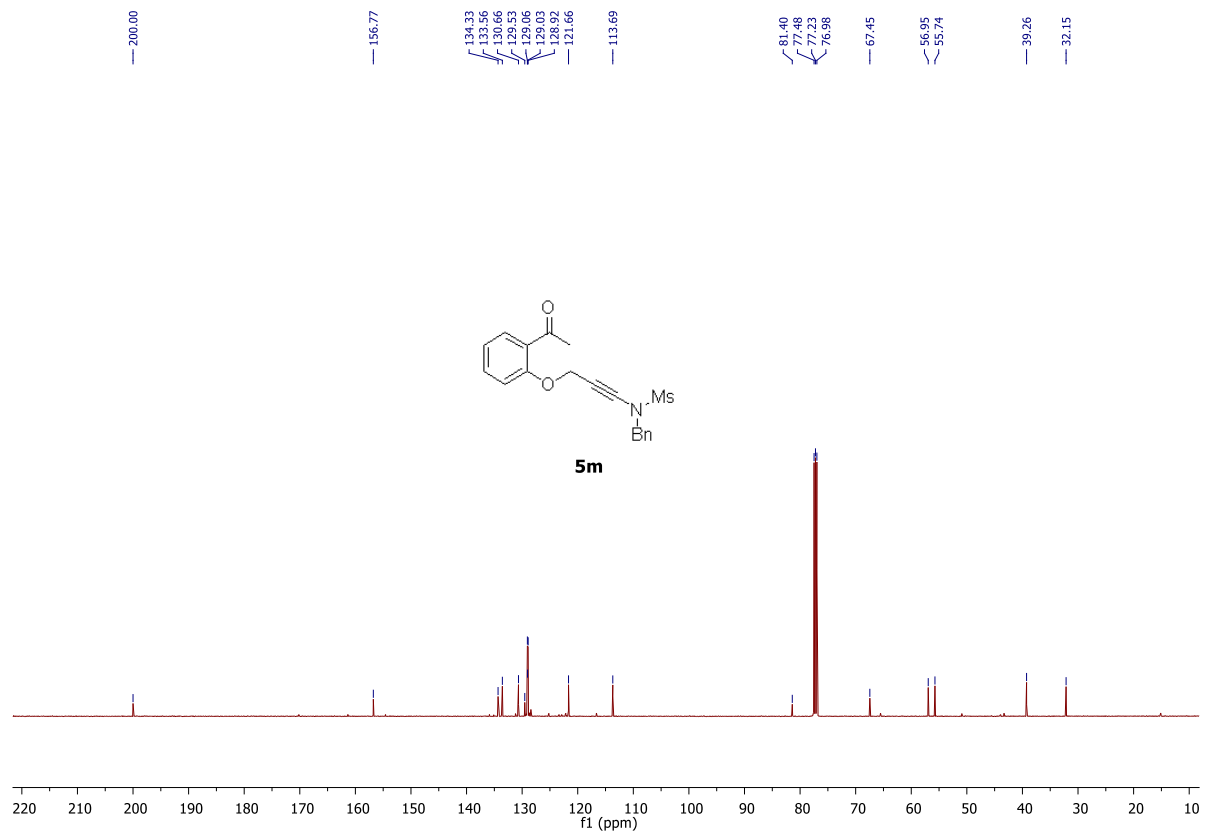



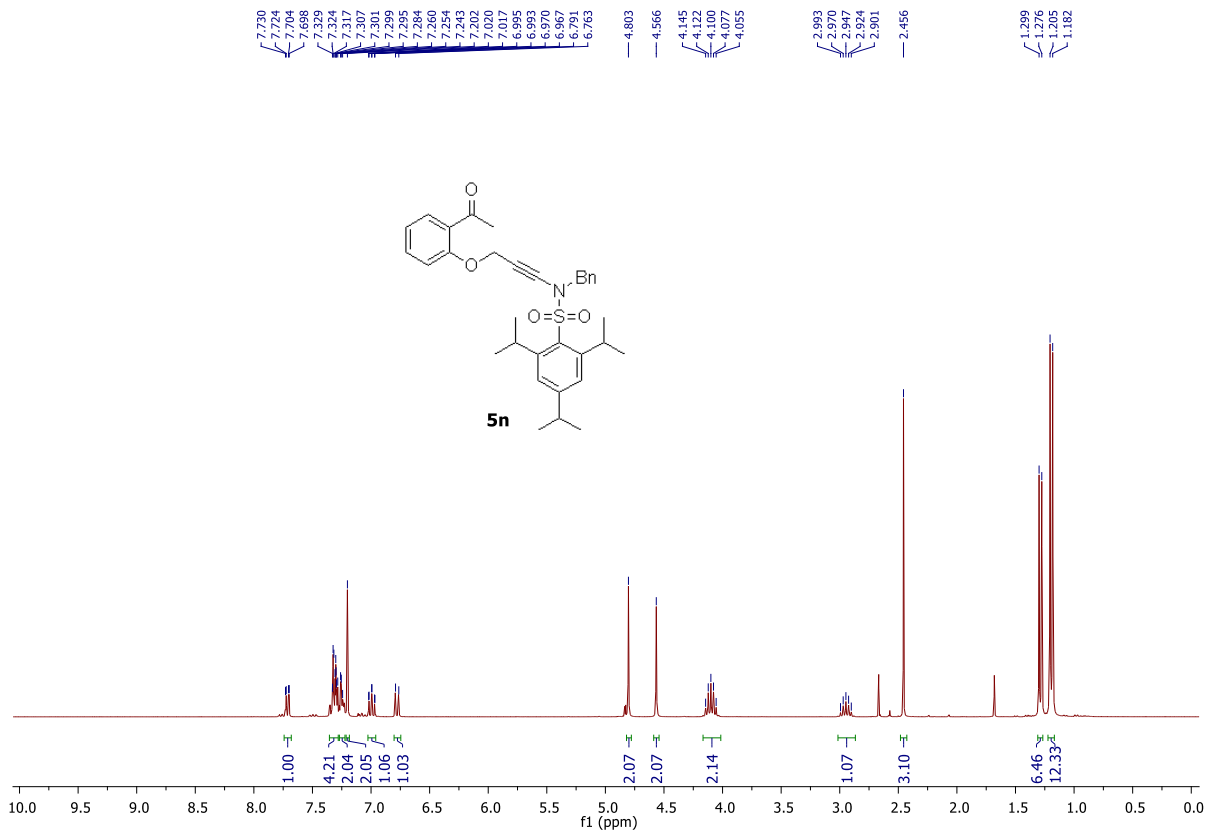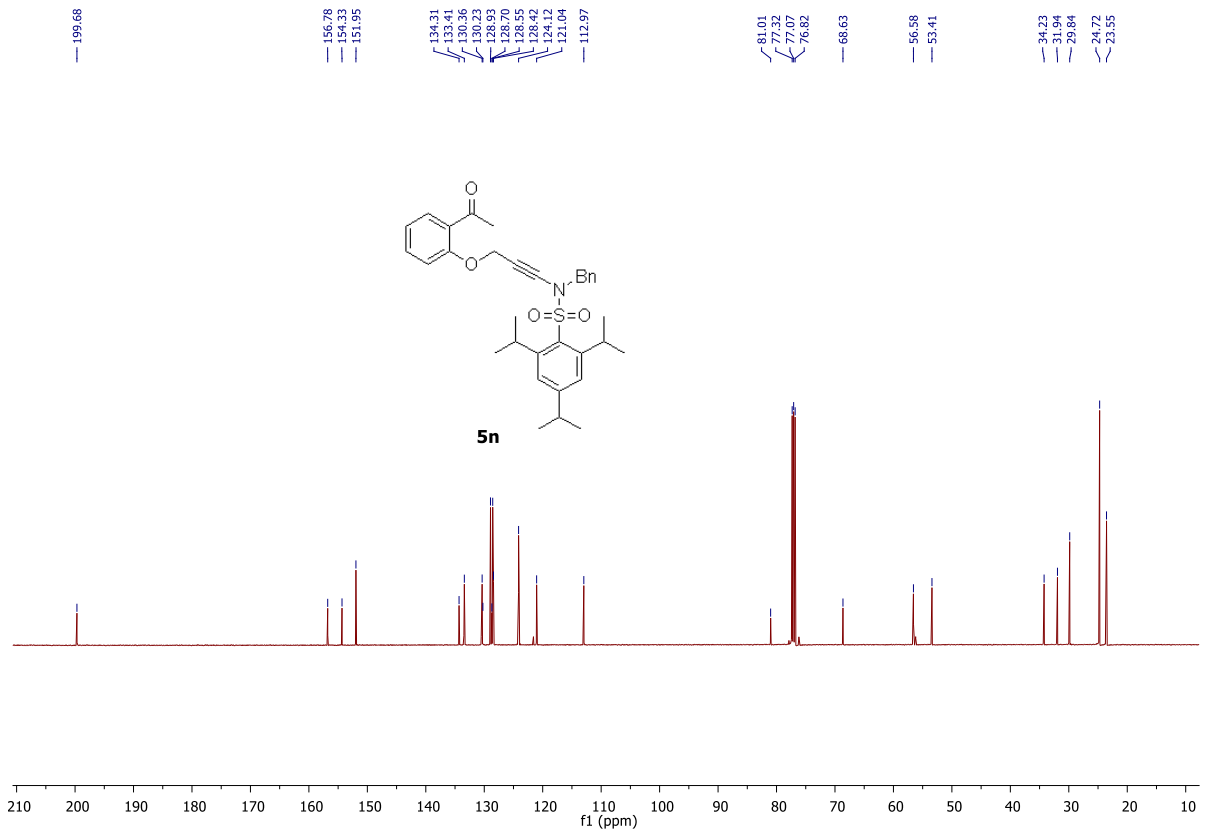

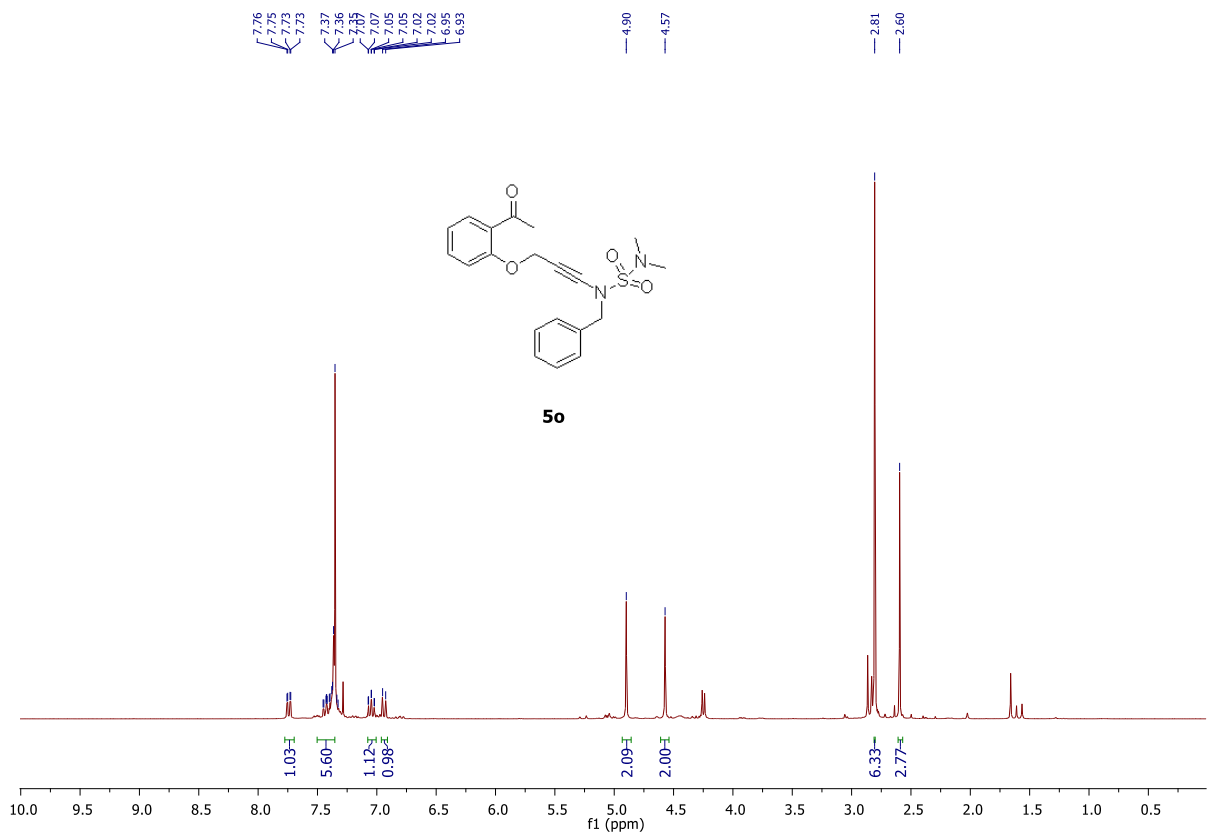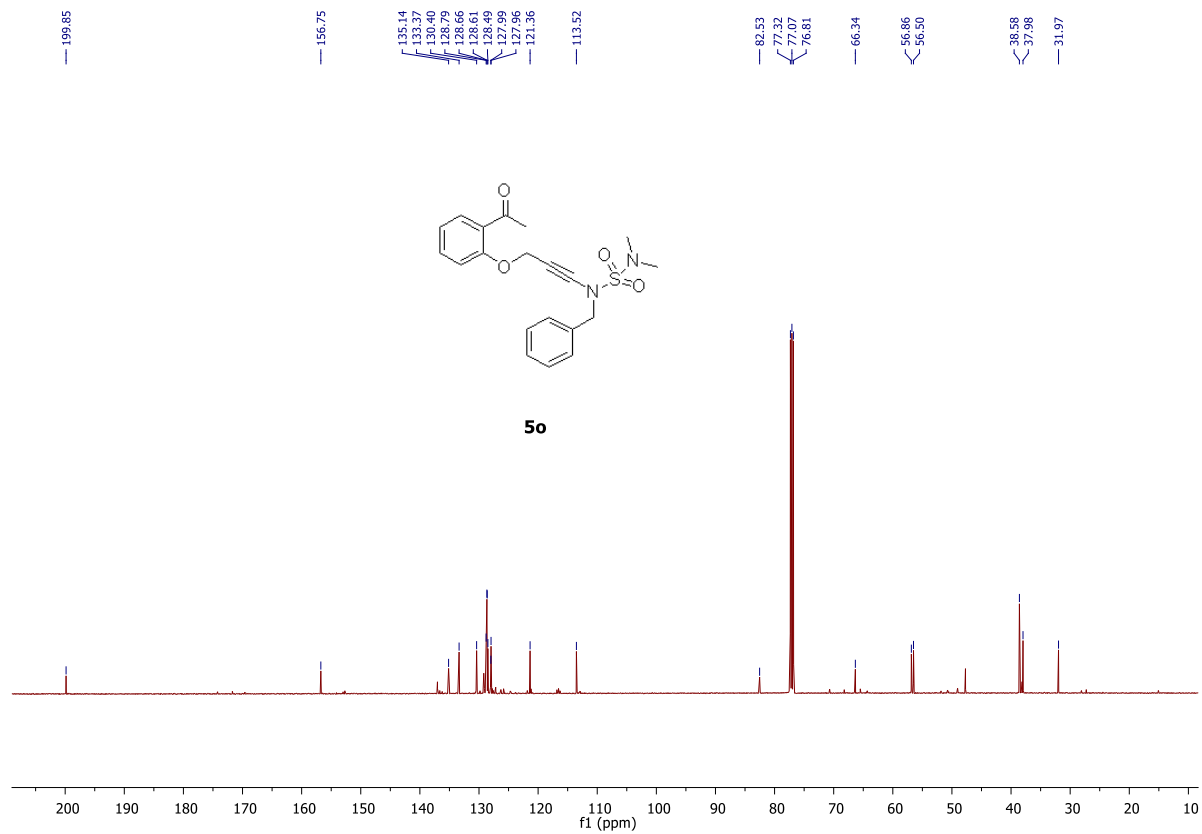

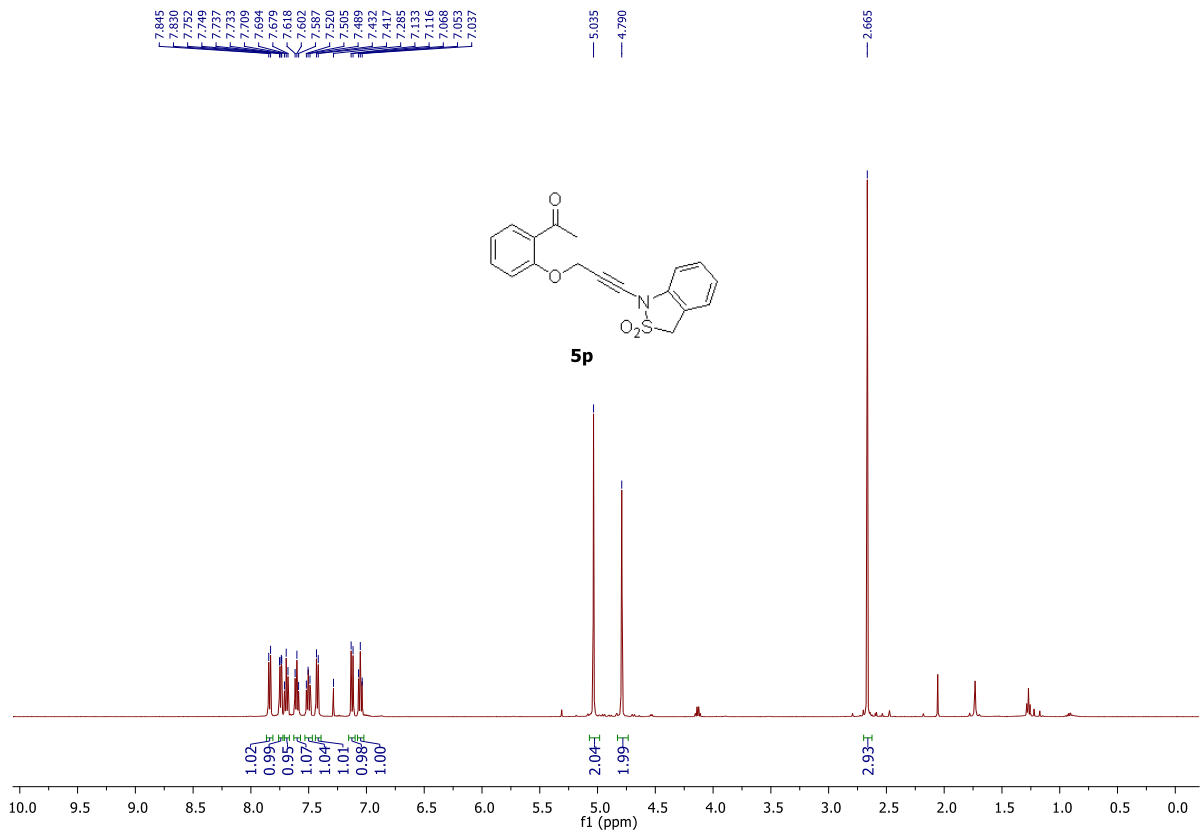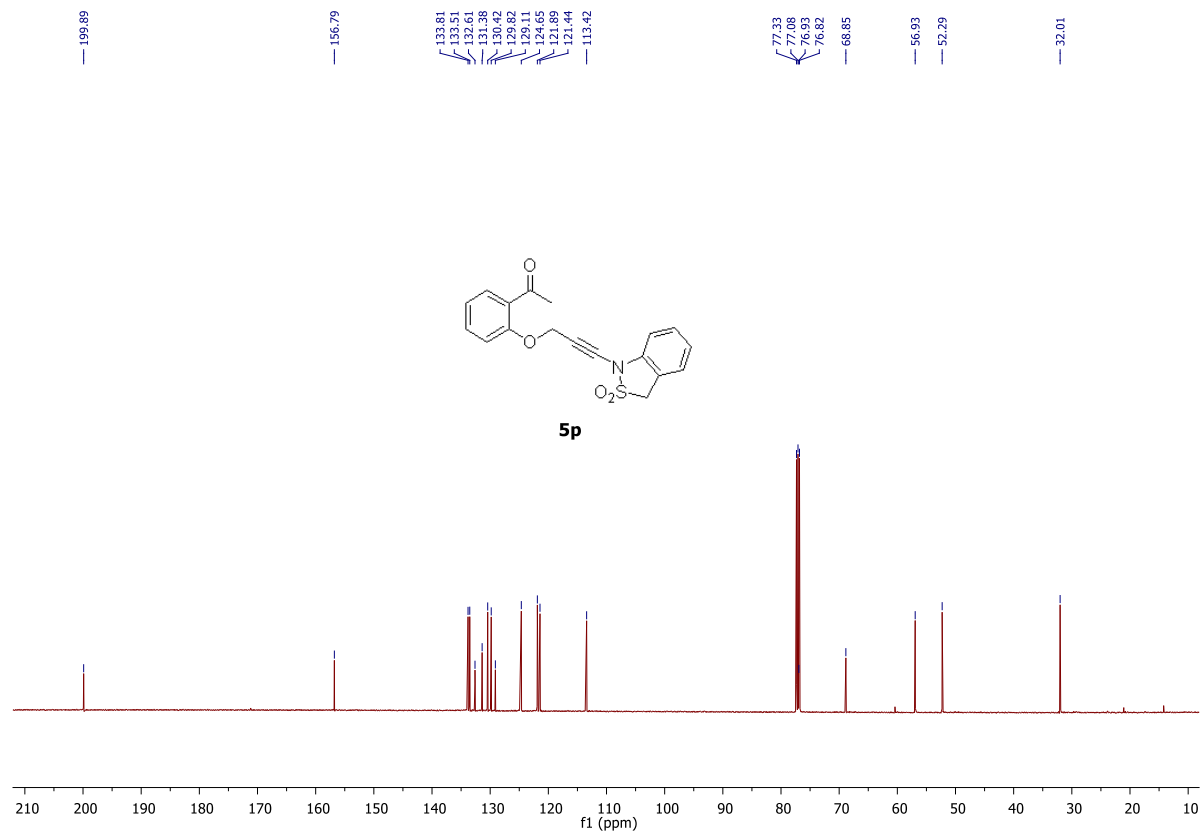

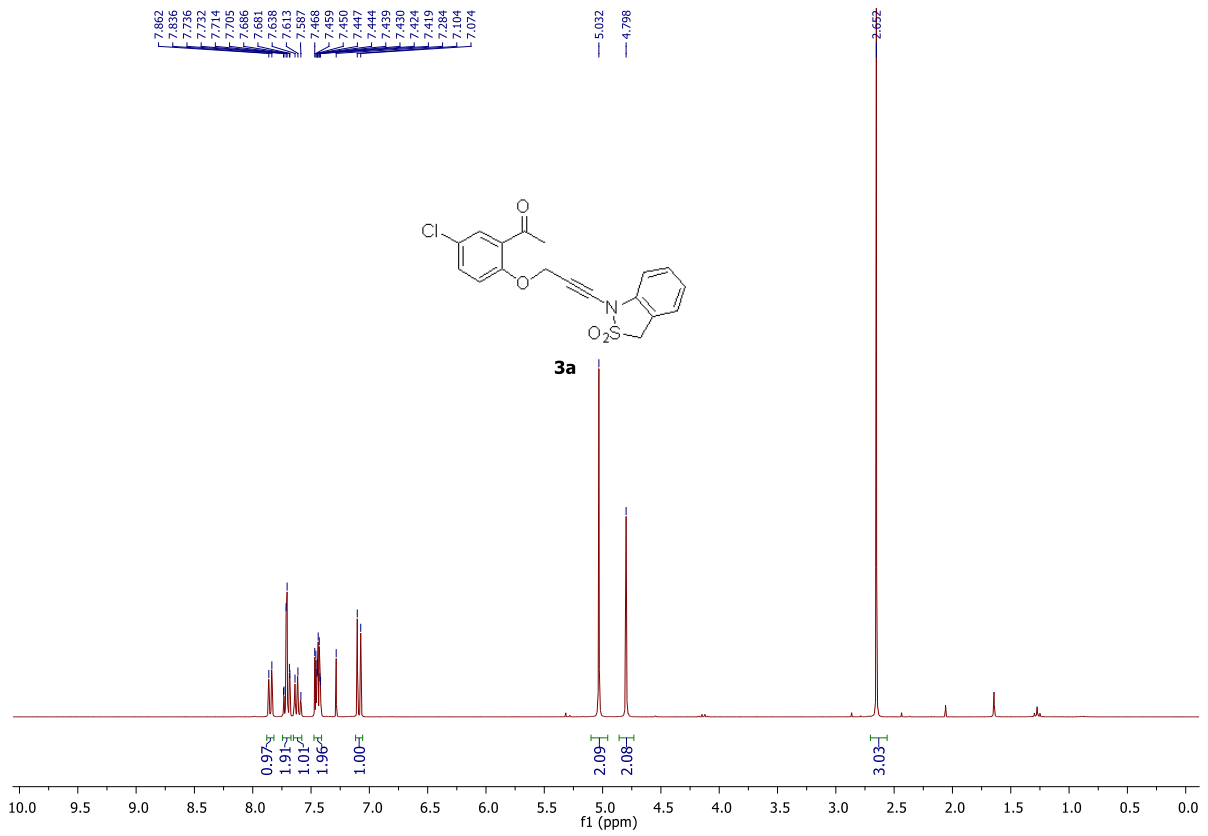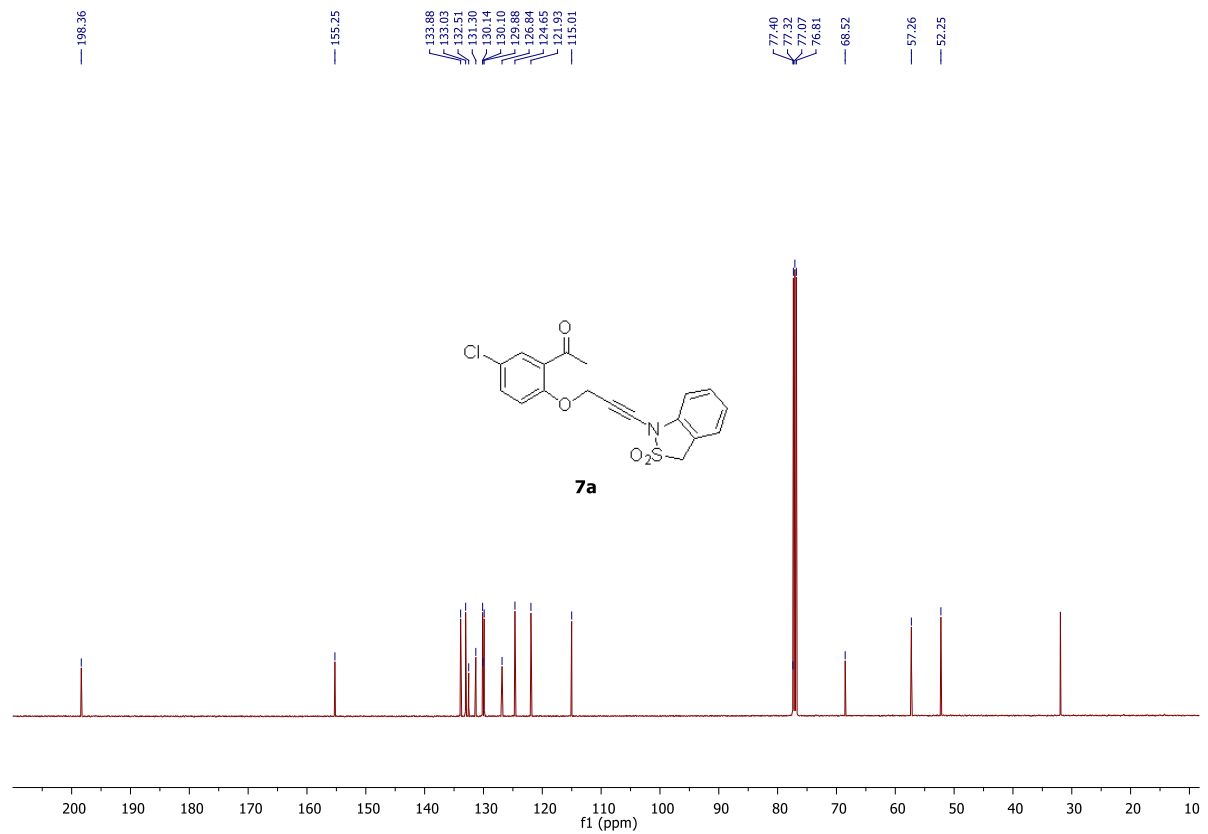

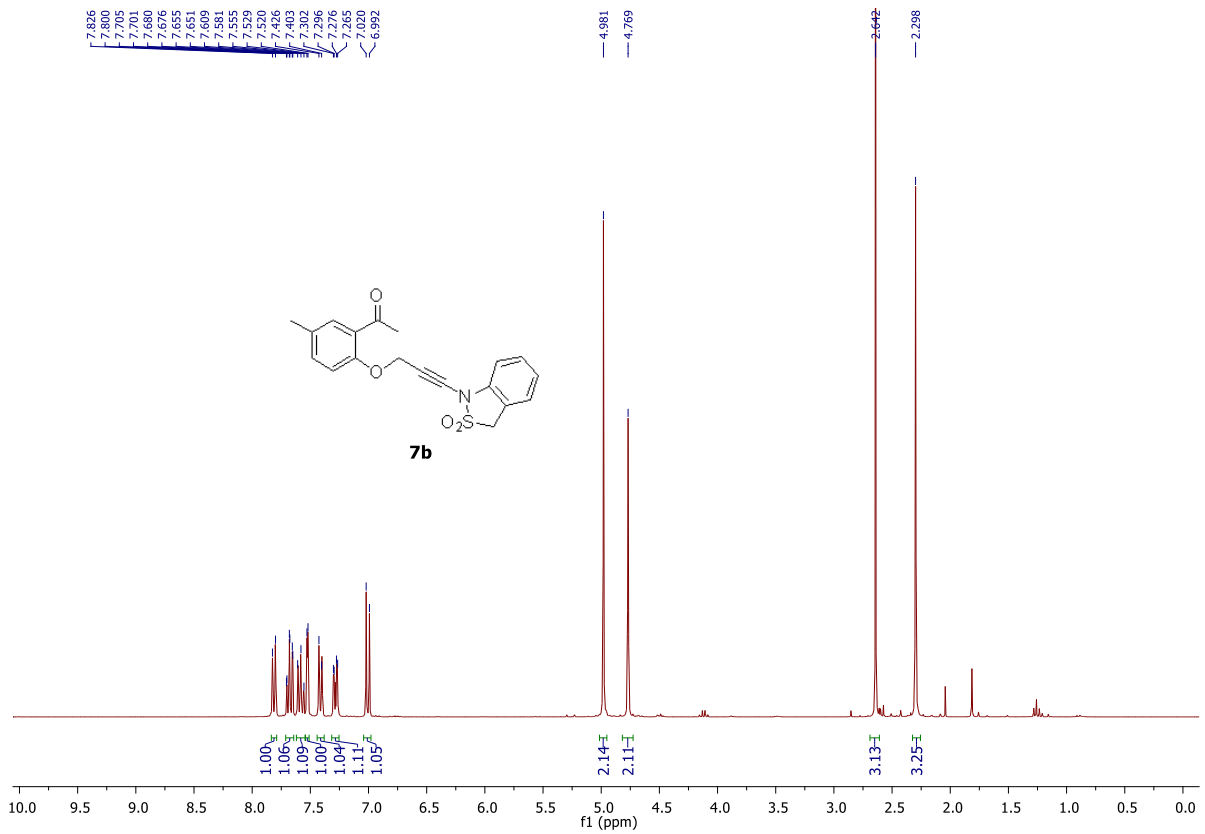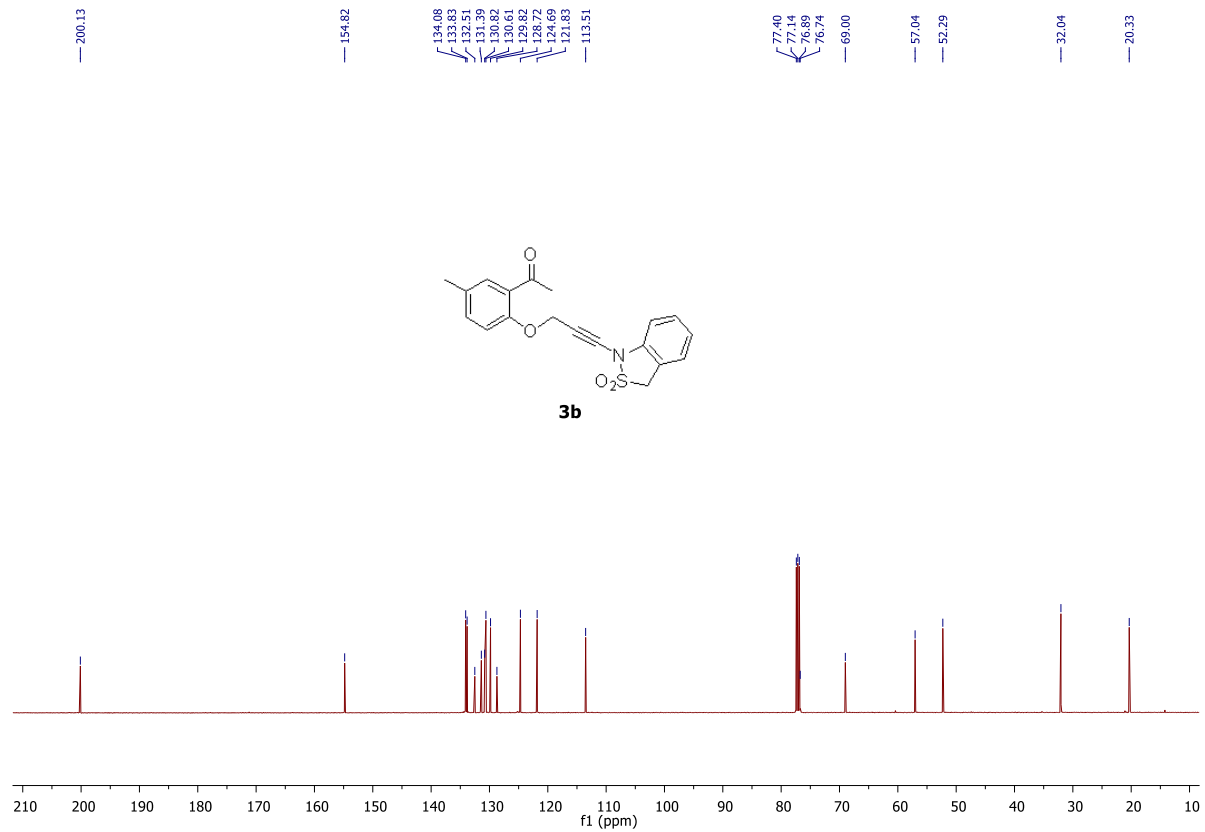

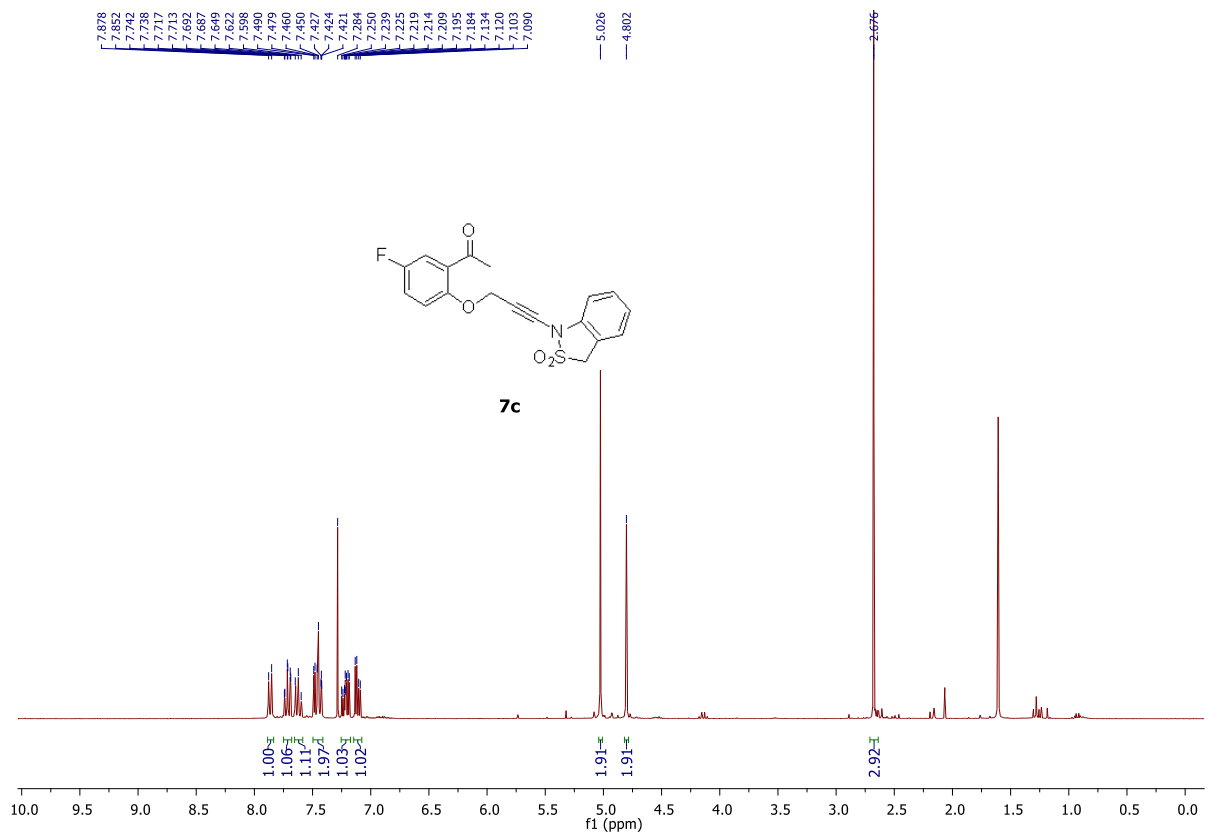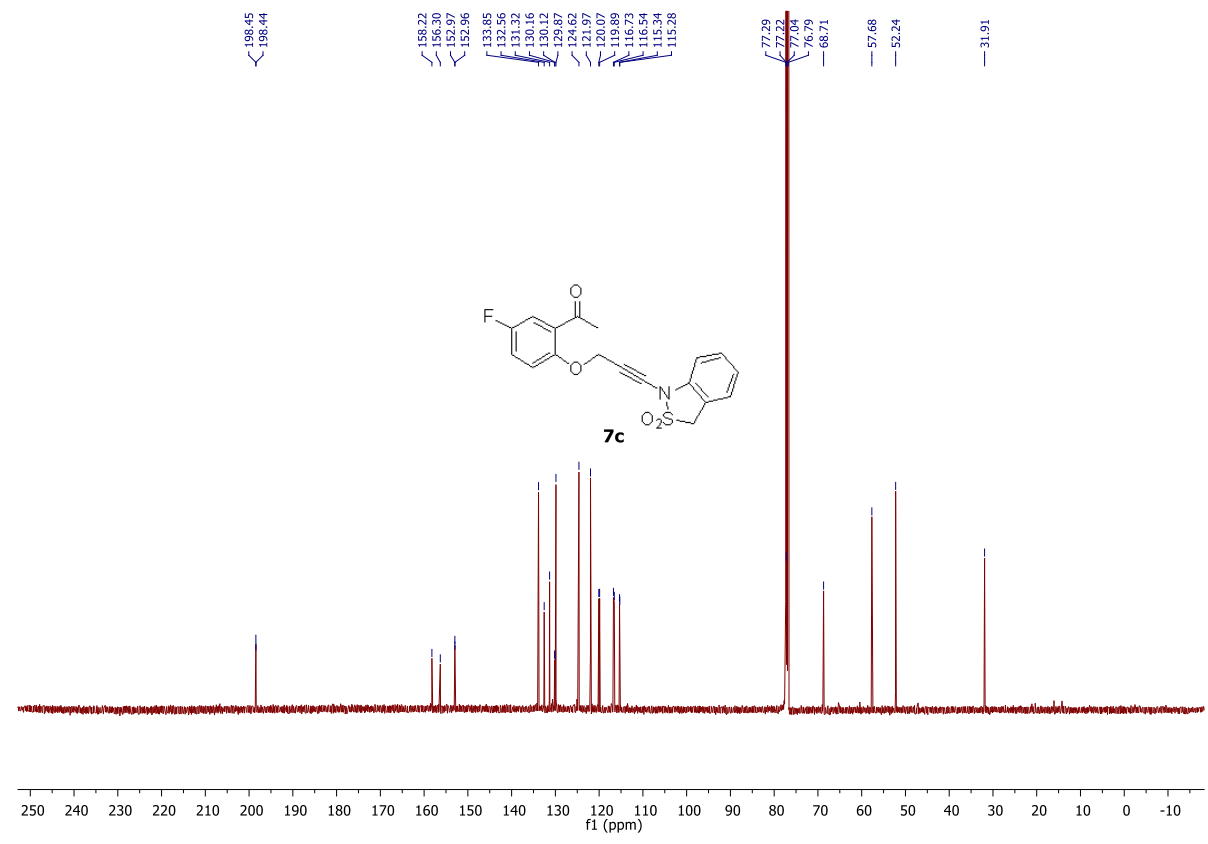

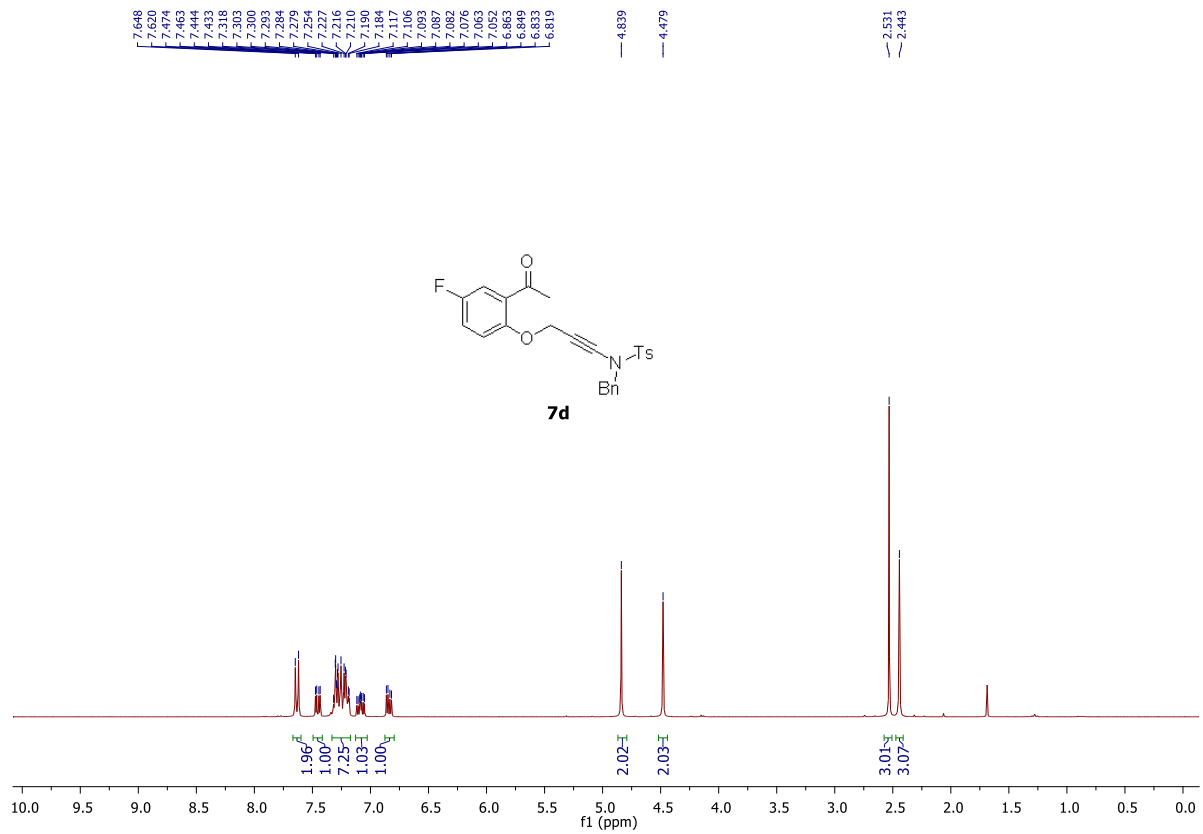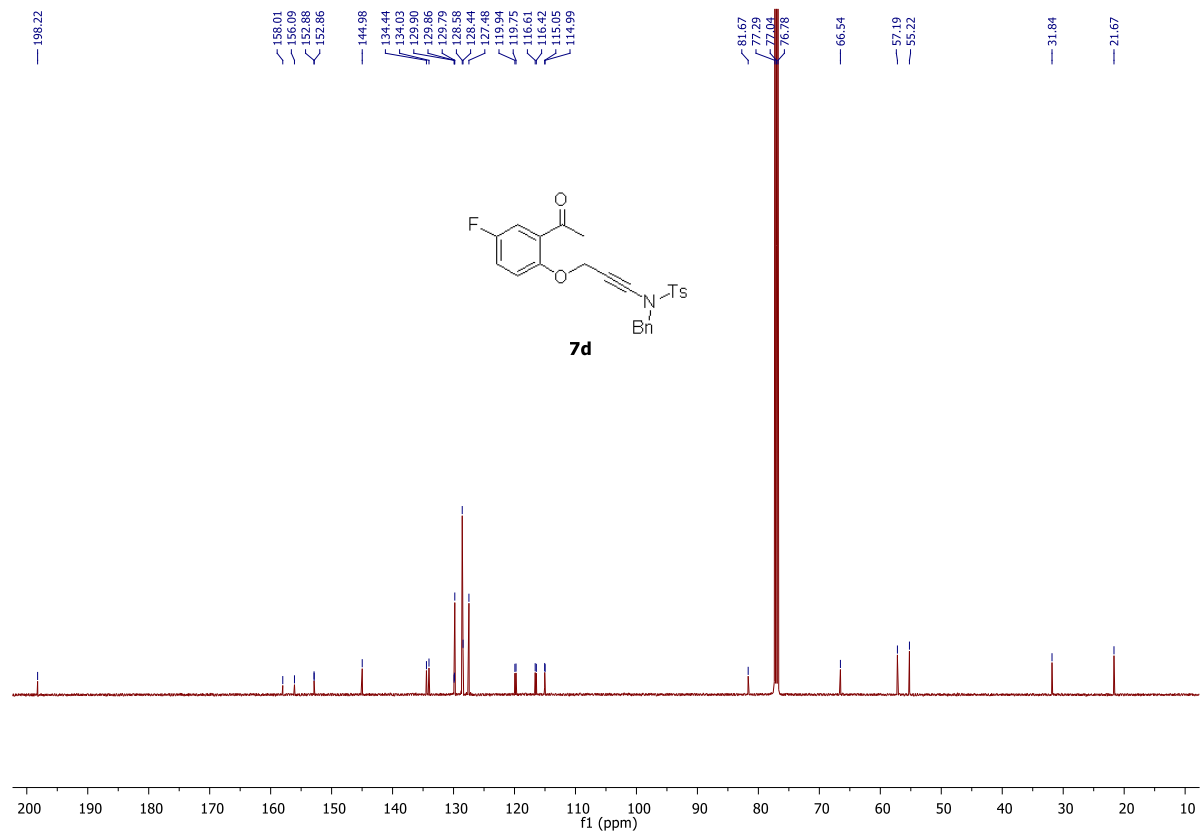

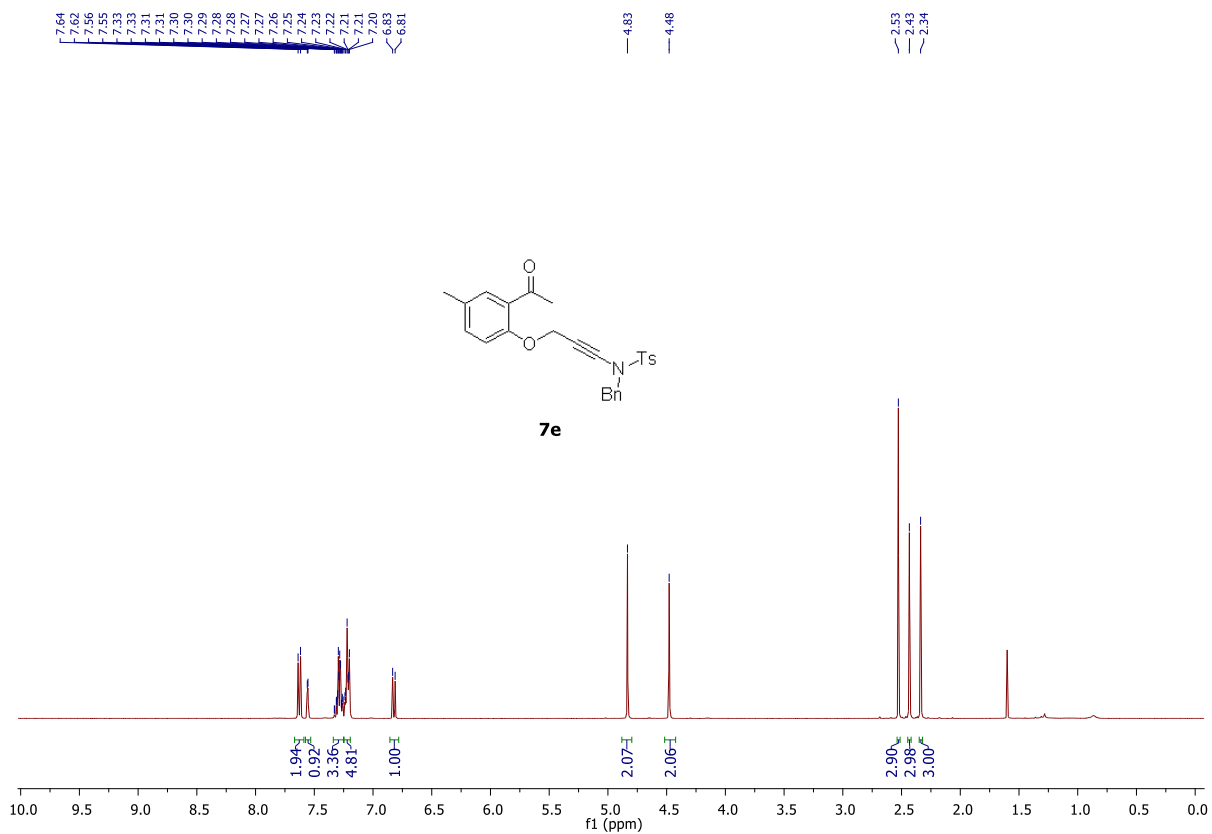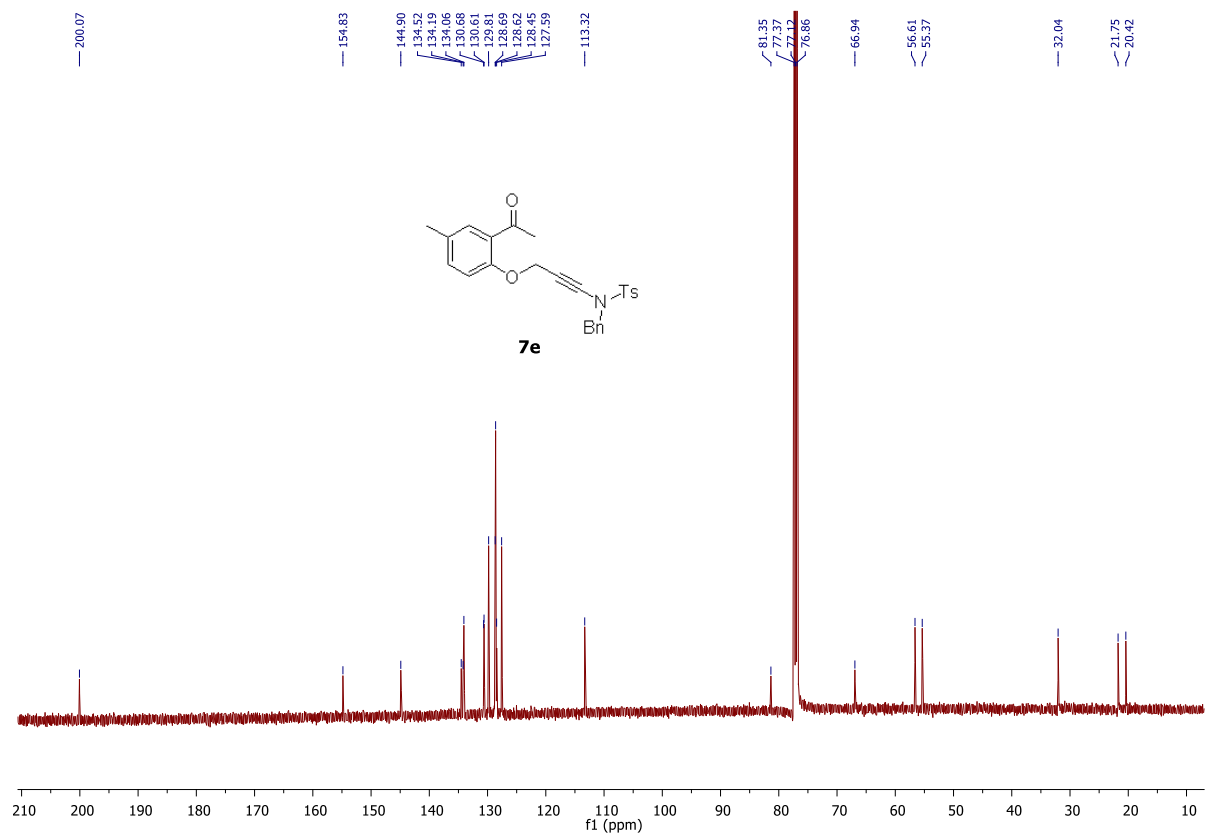



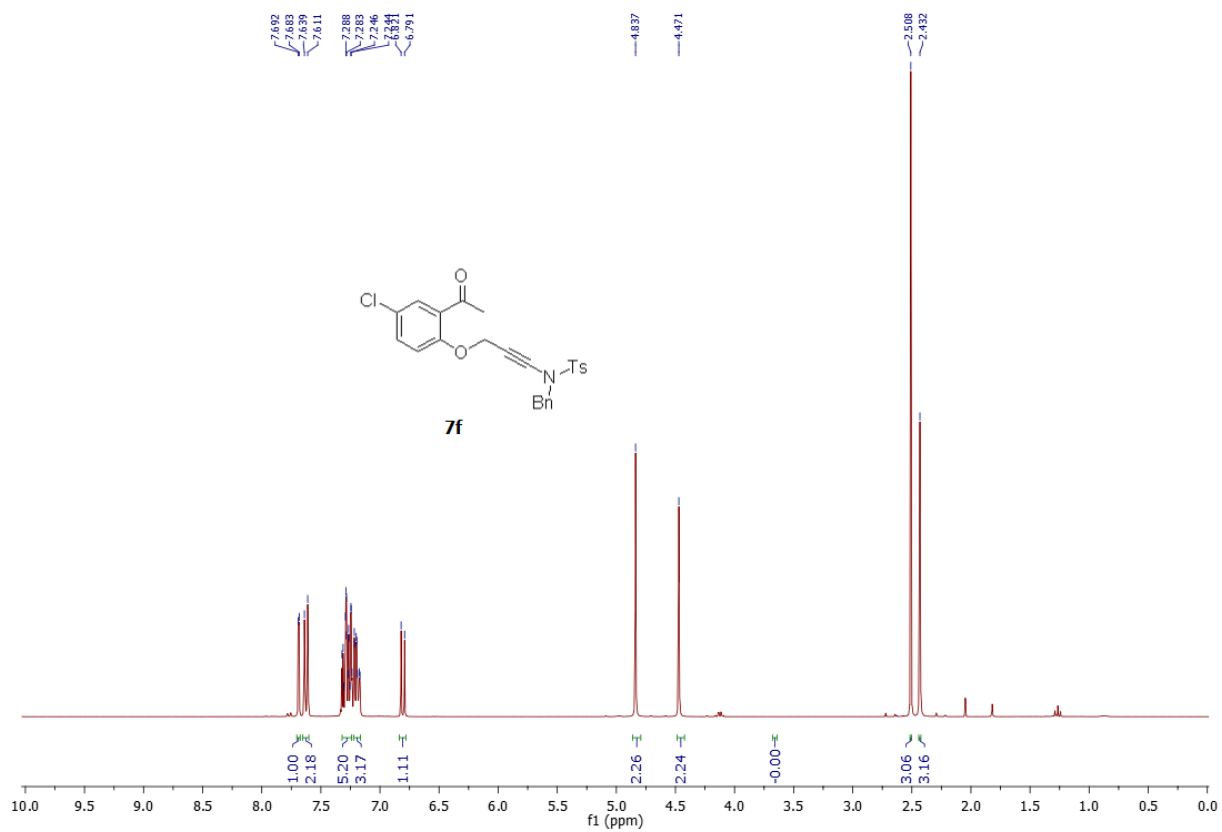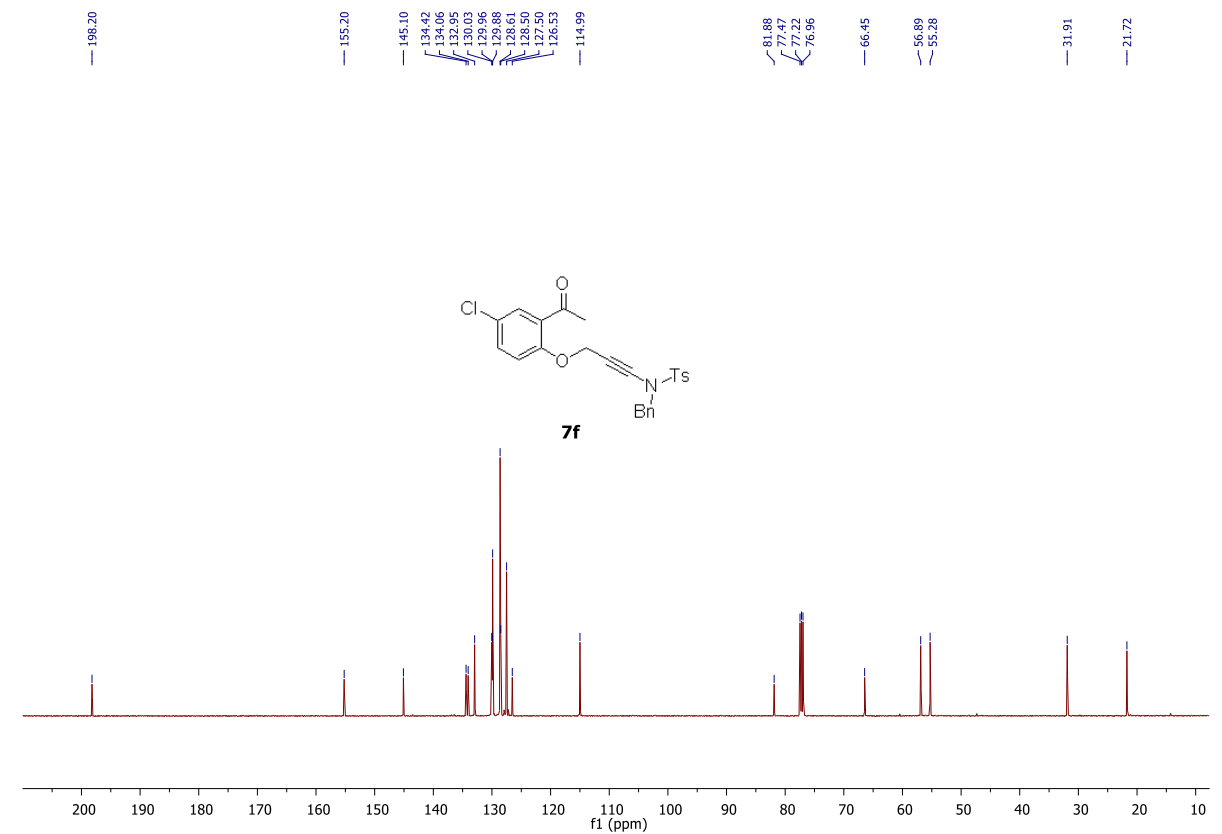

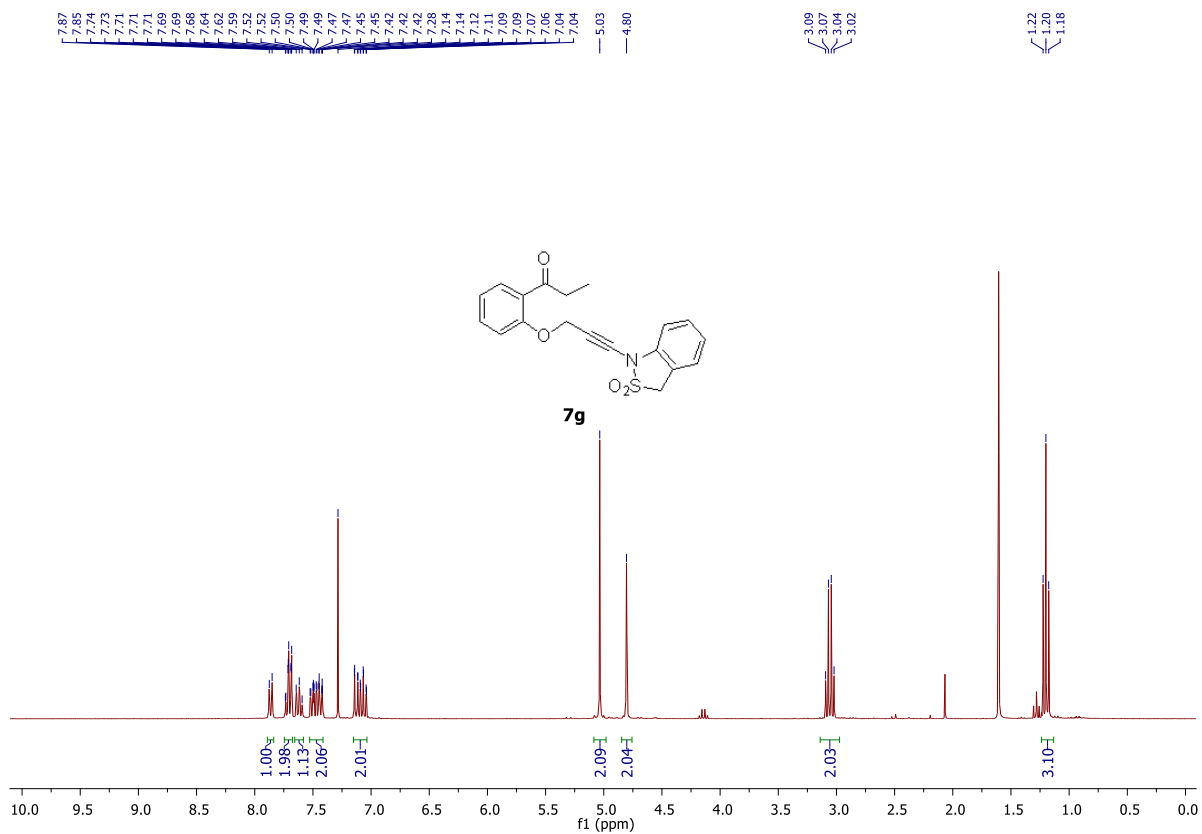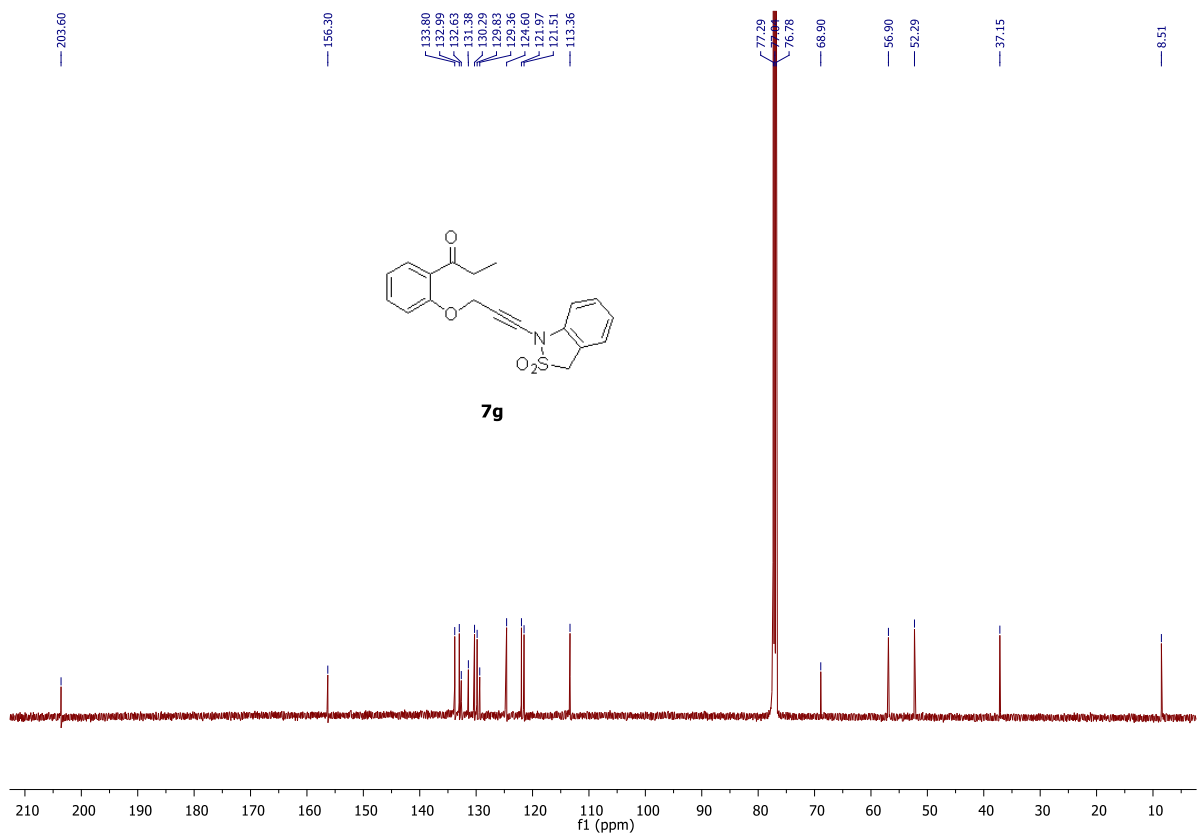

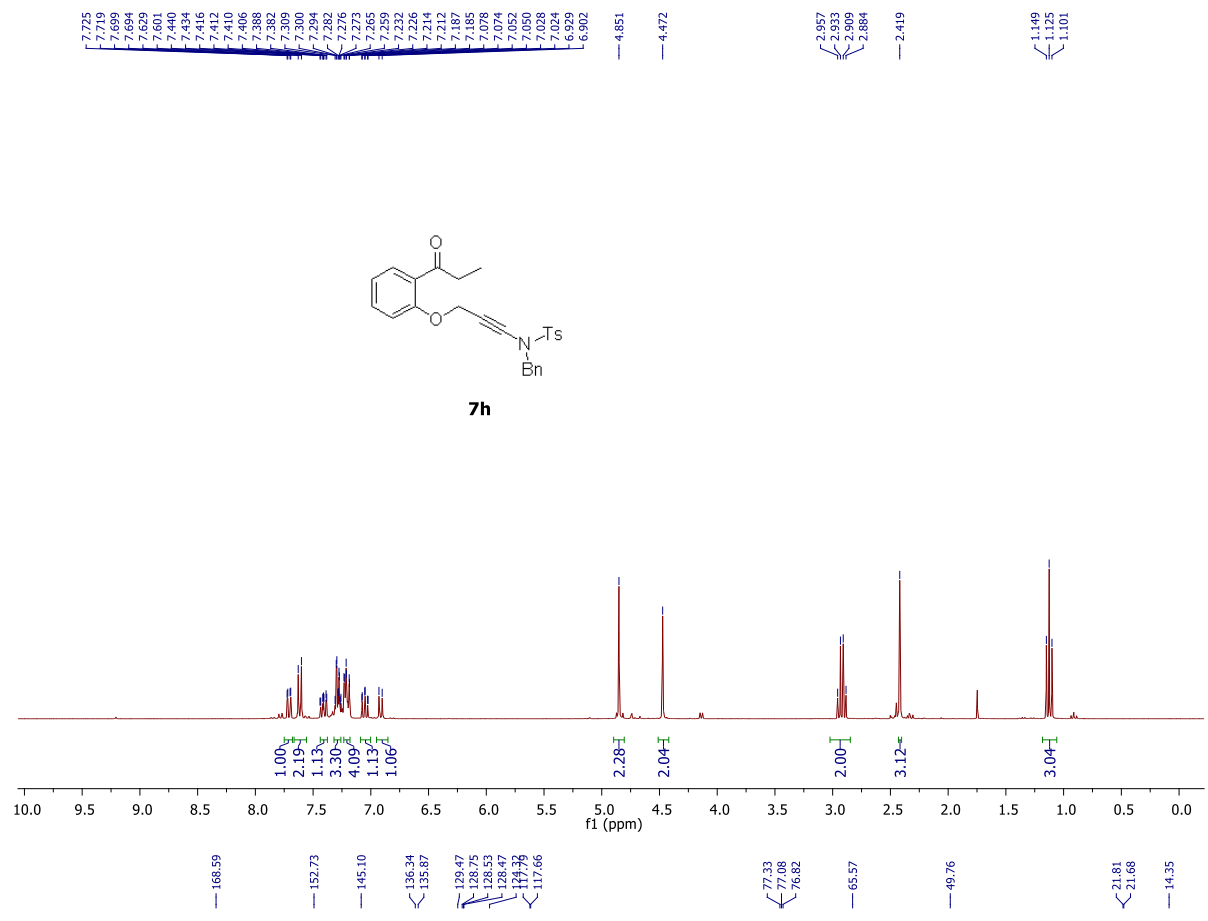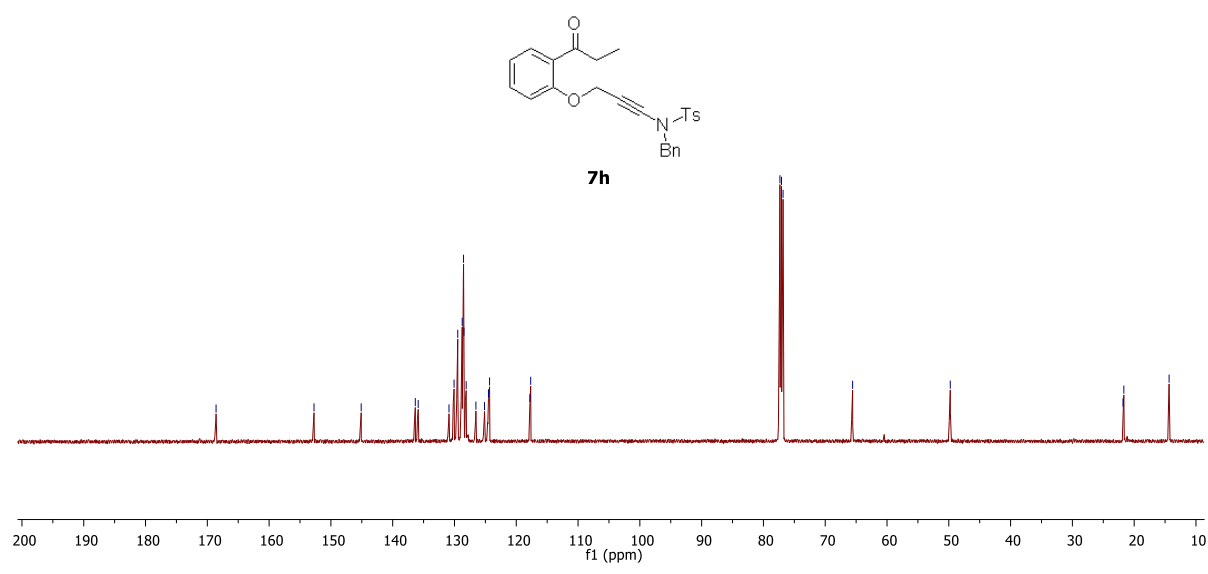

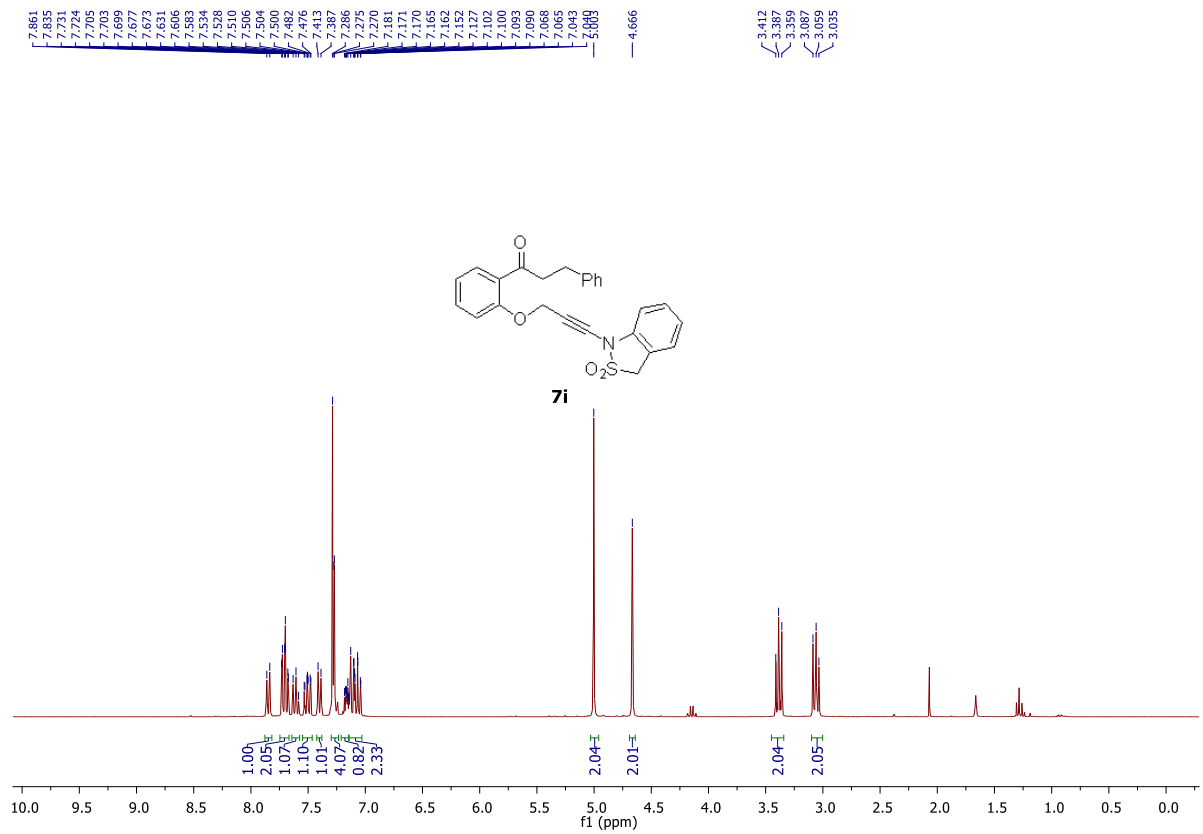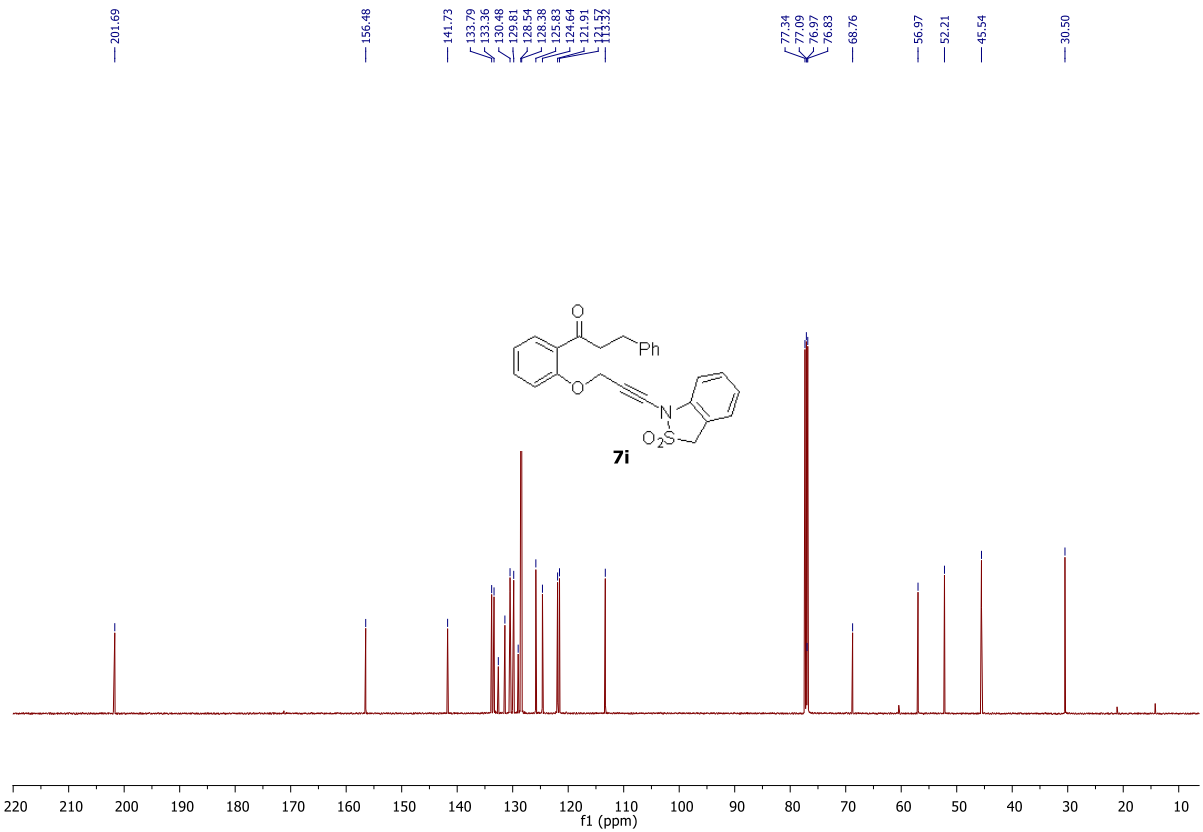

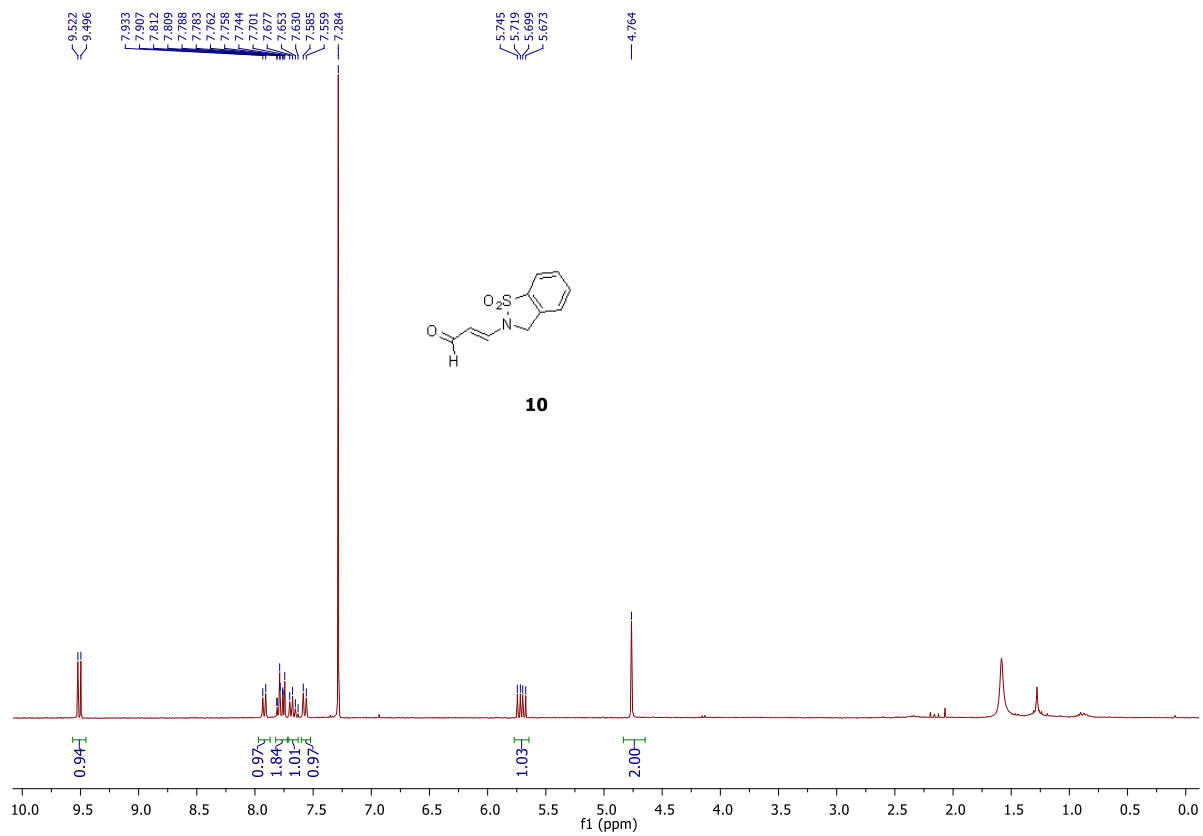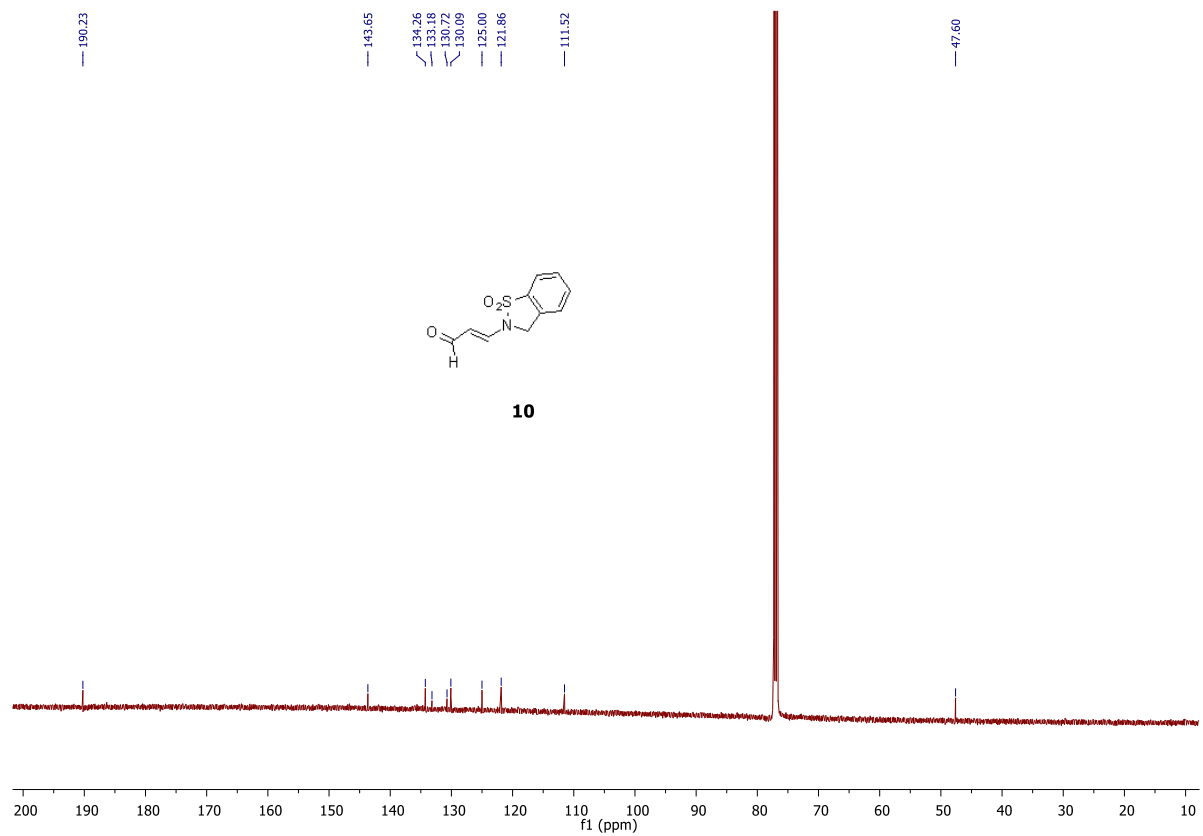

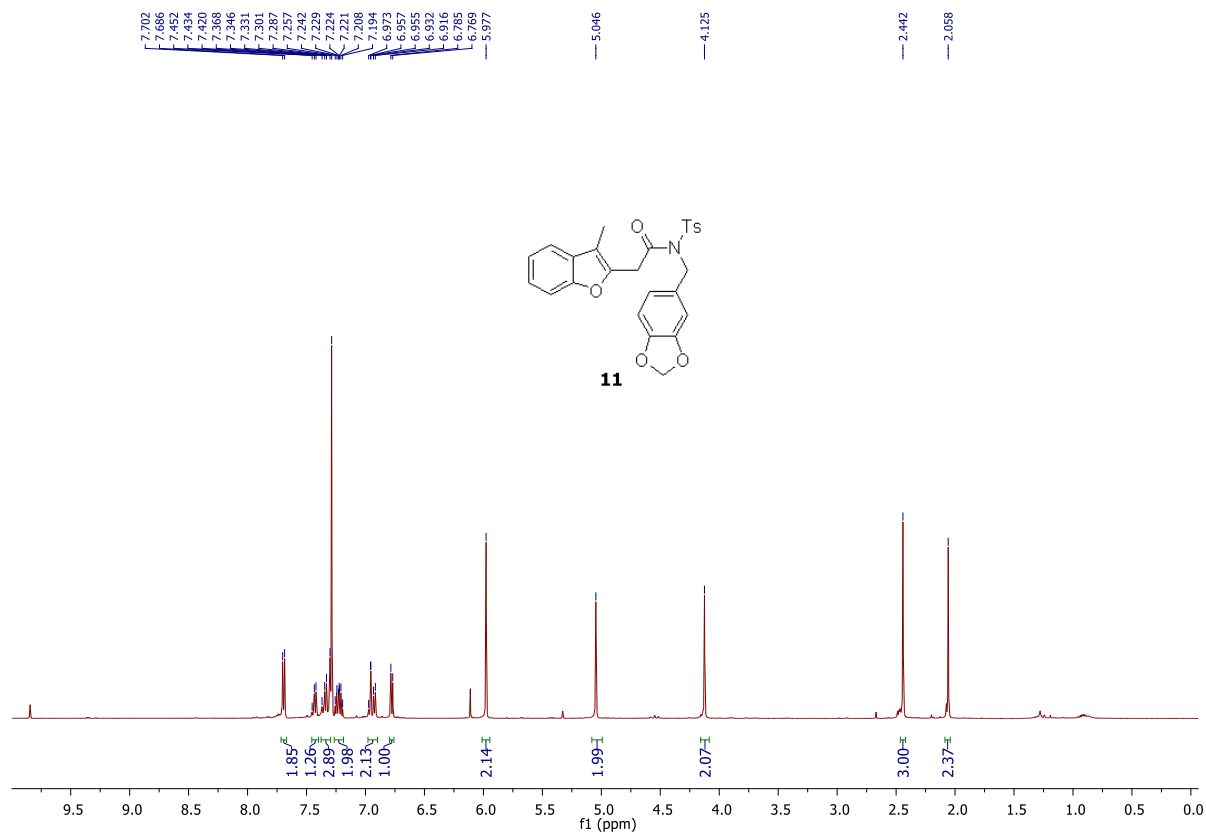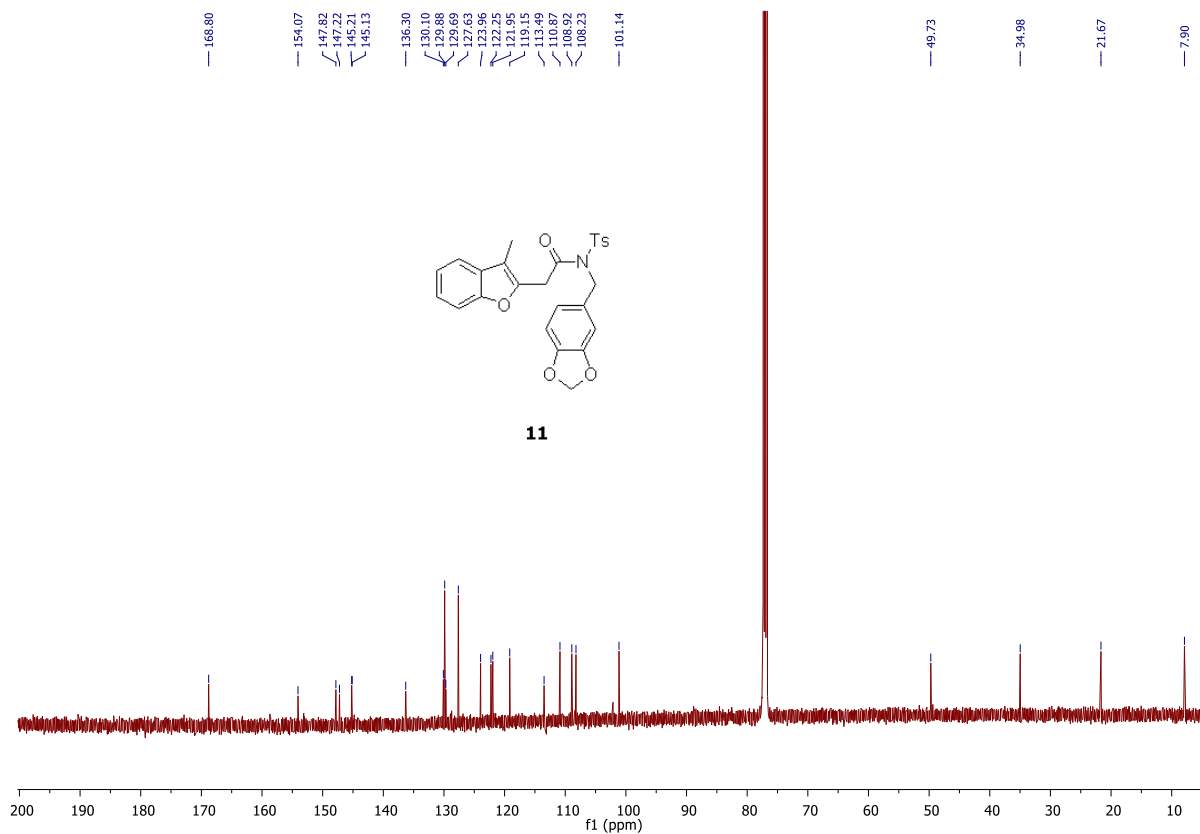

## X-Ray Crystallography data

Compound **6** was dissolved in a 0.5 mL acetone and hexane 2 mL were added. The sample was maintained at 4 °C for several days. Crystals were obtained through diffusion.

The X-ray diffraction data were collected at and 173 K on a Bruker SMART CCD diffractometer with MoK $\alpha$  radiation ( $\lambda = 0.71073 \text{ \AA}$ ). The diffraction data were corrected for absorption using the SADABS program.<sup>1</sup> The structures were solved using SHELXS97<sup>2</sup> and refined by full matrix least-squares on F<sup>2</sup> using SHELXL-2014 in the anisotropic approximation for all non-hydrogen atoms. The hydrogen atoms were introduced at calculated positions and not refined (riding model).<sup>3</sup>

---

<sup>1</sup> Bruker. SADABS. Bruker AXS Inc.: Madison, Wisconsin, USA **2001**.

<sup>2</sup> M. Sheldrick, *Acta Crystallogr. Sect. A Found. Crystallogr.* **2008**, *64* (1), 112–122

<sup>3</sup> G. M. Sheldrick, *Acta Crystallogr. Sect. C Struct. Chem.* **2015**, *71*, 3-8

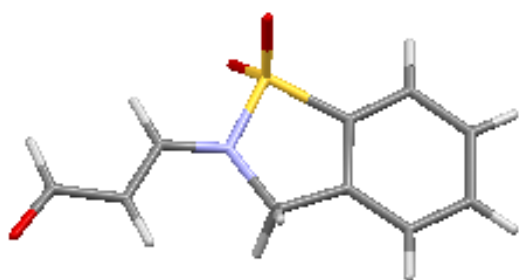

Structure of **6**: ellipsoid contour probability: 50%

## Crystal Structure Report for **10**

A specimen of  $C_{10}H_{10}NO_3S$ , approximate dimensions 0.150 mm x 0.160 mm x 0.180 mm, was used for the X-ray crystallographic analysis. The X-ray intensity data were measured ( $\lambda = 0.71073 \text{ \AA}$ ).

The integration of the data using a **triclinic** unit cell yielded a total of 12135 reflections to a maximum  $\theta$  angle of  $28.34^\circ$  (0.75  $\text{\AA}$  resolution), of which 2279 were independent (average redundancy 5.325, completeness = 93.9%,  $R_{\text{int}} = 5.30\%$ ,  $R_{\text{sig}} = 3.00\%$ ) and 2072 (90.92%) were greater than  $2\sigma(F^2)$ . The final cell constants of  $a = 6.4296(4) \text{ \AA}$ ,  $b = 7.2645(4) \text{ \AA}$ ,  $c = 11.6117(6) \text{ \AA}$ ,  $\alpha = 76.869(2)^\circ$ ,  $\beta = 79.676(2)^\circ$ ,  $\gamma = 67.916(2)^\circ$ , volume =  $486.77(5) \text{ \AA}^3$ , are based upon the refinement of the XYZ-centroids of reflections above  $20 \sigma(I)$ . The calculated minimum and maximum transmission coefficients (based on crystal size) are 0.6458 and 0.7545.

The structure was solved and refined using the Bruker SHELXTL Software Package, using the space group **P -1**, with  $Z = 2$  for the formula unit,  $C_{10}H_{10}NO_3S$ . The final anisotropic full-matrix least-squares refinement on  $F^2$  with 136 variables converged at  $R1 = 3.44\%$ , for the observed data and  $wR2 = 9.24\%$  for all data. The goodness-of-fit was 1.017. The largest peak in the final difference electron density synthesis was  $0.299 \text{ e}/\text{\AA}^3$  and the largest hole was  $-0.289 \text{ e}/\text{\AA}^3$  with an RMS deviation of  $0.050 \text{ e}/\text{\AA}^3$ . On the basis of the final model, the calculated density was  $1.530 \text{ g/cm}^3$  and  $F(000)$ , 234 e $^-$ .

### Table 1. Sample and crystal data for **10**.

|                     |                     |
|---------------------|---------------------|
| Identification code | e5055               |
| Chemical formula    | $C_{10}H_{10}NO_3S$ |
| Formula weight      | 224.25 g/mol        |



|                               |                                                                                                                                        |
|-------------------------------|----------------------------------------------------------------------------------------------------------------------------------------|
| <b>Temperature</b>            | 173(2) K                                                                                                                               |
| <b>Wavelength</b>             | 0.71073 Å                                                                                                                              |
| <b>Crystal size</b>           | 0.150 x 0.160 x 0.180 mm                                                                                                               |
| <b>Crystal system</b>         | triclinic                                                                                                                              |
| <b>Space group</b>            | P -1                                                                                                                                   |
| <b>Unit cell dimensions</b>   | a = 6.4296(4) Å $\alpha = 76.869(2)^\circ$<br>b = 7.2645(4) Å $\beta = 79.676(2)^\circ$<br>c = 11.6117(6) Å $\gamma = 67.916(2)^\circ$ |
| <b>Volume</b>                 | 486.77(5) Å <sup>3</sup>                                                                                                               |
| <b>Z</b>                      | 2                                                                                                                                      |
| <b>Density (calculated)</b>   | 1.530 g/cm <sup>3</sup>                                                                                                                |
| <b>Absorption coefficient</b> | 0.317 mm <sup>-1</sup>                                                                                                                 |
| <b>F(000)</b>                 | 234                                                                                                                                    |

## Table 2. Data collection and structure refinement for 10.

|                                         |                                             |
|-----------------------------------------|---------------------------------------------|
| <b>Theta range for data collection</b>  | 3.07 to 28.34°                              |
| <b>Index ranges</b>                     | -8 ≤ h ≤ 8, -9 ≤ k ≤ 9, -15 ≤ l ≤ 14        |
| <b>Reflections collected</b>            | 12135                                       |
| <b>Independent reflections</b>          | 2279 [R(int) = 0.0530]                      |
| <b>Max. and min. transmission</b>       | 0.7545 and 0.6458                           |
| <b>Structure solution technique</b>     | direct methods                              |
| <b>Structure solution program</b>       | SHELXT 2014/5 (Sheldrick, 2014)             |
| <b>Refinement method</b>                | Full-matrix least-squares on F <sup>2</sup> |
| <b>Refinement program</b>               | SHELXL-2018/3 (Sheldrick, 2018)             |
| <b>Function minimized</b>               | $\Sigma w(F_o^2 - F_c^2)^2$                 |
| <b>Data / restraints / parameters</b>   | 2279 / 0 / 136                              |
| <b>Goodness-of-fit on F<sup>2</sup></b> | 1.017                                       |

|                                        |                                                                                     |                              |
|----------------------------------------|-------------------------------------------------------------------------------------|------------------------------|
| $\Delta/\sigma_{\max}$                 | 0.001                                                                               |                              |
| <b>Final R indices</b>                 | 2072 data;<br>$I > 2\sigma(I)$                                                      | R1 = 0.0344, wR2 =<br>0.0896 |
|                                        | all data                                                                            | R1 = 0.0378, wR2 =<br>0.0924 |
| <b>Weighting scheme</b>                | $w = 1/[\sigma^2(F_o^2) + (0.0346P)^2 + 0.3297P]$<br>where $P = (F_o^2 + 2F_c^2)/3$ |                              |
| <b>Largest diff. peak<br/>and hole</b> | 0.299 and -0.289 eÅ <sup>-3</sup>                                                   |                              |
| <b>R.M.S. deviation<br/>from mean</b>  | 0.050 eÅ <sup>-3</sup>                                                              |                              |

### Table 3. Atomic coordinates and equivalent isotropic atomic displacement parameters (Å<sup>2</sup>) for 10.

U(eq) is defined as one third of the trace of  
the orthogonalized  $U_{ij}$  tensor.

|     | x/a        | y/b         | z/c         | U(eq)       |
|-----|------------|-------------|-------------|-------------|
| S1  | 0.66110(6) | 0.59483(6)  | 0.61777(3)  | 0.02666(13) |
| O1  | 0.6661(2)  | 0.40750(19) | 0.59584(12) | 0.0378(3)   |
| O2  | 0.7503(2)  | 0.7165(2)   | 0.52273(12) | 0.0442(3)   |
| N1  | 0.7888(2)  | 0.5516(2)   | 0.73981(12) | 0.0265(3)   |
| C1  | 0.3998(2)  | 0.7335(2)   | 0.68453(13) | 0.0235(3)   |
| C2  | 0.2009(3)  | 0.8243(2)   | 0.63078(14) | 0.0288(3)   |
| C3  | 0.0101(3)  | 0.9263(2)   | 0.69843(16) | 0.0303(3)   |
| C4  | 0.0189(3)  | 0.9348(2)   | 0.81580(16) | 0.0300(3)   |
| C5  | 0.2201(3)  | 0.8425(2)   | 0.86789(15) | 0.0284(3)   |
| C6  | 0.4134(2)  | 0.7408(2)   | 0.80109(14) | 0.0234(3)   |
| C7  | 0.6444(3)  | 0.6323(2)   | 0.84225(14) | 0.0268(3)   |
| C8  | 0.0109(2)  | 0.4323(2)   | 0.74296(14) | 0.0258(3)   |
| C9  | 0.1271(3)  | 0.3844(2)   | 0.83704(15) | 0.0268(3)   |
| C10 | 0.3627(3)  | 0.2622(3)   | 0.82791(16) | 0.0315(4)   |
| O3  | 0.4880(2)  | 0.2224(2)   | 0.90428(13) | 0.0438(3)   |

**Table 4. Bond lengths (Å) for 10.**

|             |            |            |            |
|-------------|------------|------------|------------|
| S1-O1       | 1.4282(13) | S1-O2      | 1.4279(13) |
| S1-N1       | 1.6737(13) | S1-C1      | 1.7474(16) |
| N1-C8       | 1.3657(19) | N1-C7      | 1.460(2)   |
| C1-C6       | 1.386(2)   | C1-C2      | 1.387(2)   |
| C2-C3       | 1.381(2)   | C2-H2      | 0.95       |
| C3-C4       | 1.390(2)   | C3-H3      | 0.95       |
| C4-C5       | 1.390(2)   | C4-H4      | 0.95       |
| C5-C6       | 1.384(2)   | C5-H5      | 0.95       |
| C6-C7       | 1.503(2)   | C7-<br>H7A | 0.99       |
| C7-H7B      | 0.99       | C8-C9      | 1.341(2)   |
| C8-H8       | 0.95       | C9-C10     | 1.438(2)   |
| C9-H9       | 0.95       | C10-O3     | 1.218(2)   |
| C10-<br>H10 | 0.95       |            |            |

**Table 5. Bond angles (°) for 10.**

|          |            |          |            |
|----------|------------|----------|------------|
| O1-S1-O2 | 117.08(9)  | O1-S1-N1 | 109.04(7)  |
| O2-S1-N1 | 110.05(8)  | O1-S1-C1 | 112.80(8)  |
| O2-S1-C1 | 112.50(8)  | N1-S1-C1 | 92.58(7)   |
| C8-N1-C7 | 123.61(13) | C8-N1-S1 | 120.11(11) |
| C7-N1-S1 | 116.04(10) | C6-C1-C2 | 123.09(15) |
| C6-C1-S1 | 111.29(11) | C2-C1-S1 | 125.62(13) |
| C3-C2-C1 | 117.23(15) | C3-C2-H2 | 121.4      |
| C1-C2-H2 | 121.4      | C2-C3-C4 | 120.80(14) |
| C2-C3-H3 | 119.6      | C4-C3-H3 | 119.6      |
| C5-C4-C3 | 120.99(15) | C5-C4-H4 | 119.5      |
| C3-C4-H4 | 119.5      | C4-C5-C6 | 118.99(15) |
| C4-C5-H5 | 120.5      | C6-C5-H5 | 120.5      |
| C5-C6-C1 | 118.91(14) | C5-C6-C7 | 126.42(14) |
| C1-C6-C7 | 114.67(13) | N1-C7-C6 | 105.38(12) |

|                |            |                |            |
|----------------|------------|----------------|------------|
| N1-C7-H7A      | 110.7      | C6-C7-H7A      | 110.7      |
| N1-C7-H7B      | 110.7      | C6-C7-H7B      | 110.7      |
| H7A-C7-<br>H7B | 108.8      | C9-C8-N1       | 124.79(15) |
| C9-C8-H8       | 117.6      | N1-C8-H8       | 117.6      |
| C8-C9-C10      | 119.44(15) | C8-C9-H9       | 120.3      |
| C10-C9-H9      | 120.3      | O3-C10-C9      | 124.93(17) |
| O3-C10-H10     | 117.5      | C9-C10-<br>H10 | 117.5      |

**Table 6. Torsion angles (°) for 10.**

|                 |                 |                 |                 |
|-----------------|-----------------|-----------------|-----------------|
| O1-S1-N1-<br>C8 | 61.22(14)       | O2-S1-N1-<br>C8 | -68.47(14)      |
| C1-S1-N1-<br>C8 | 176.43(13)      | O1-S1-N1-<br>C7 | -<br>113.38(12) |
| O2-S1-N1-<br>C7 | 116.93(12)      | C1-S1-N1-<br>C7 | 1.83(12)        |
| O1-S1-C1-<br>C6 | 110.57(12)      | O2-S1-C1-<br>C6 | -<br>114.30(12) |
| N1-S1-C1-<br>C6 | -1.34(12)       | O1-S1-C1-<br>C2 | -68.71(16)      |
| O2-S1-C1-<br>C2 | 66.42(16)       | N1-S1-C1-<br>C2 | 179.38(14)      |
| C6-C1-C2-<br>C3 | 0.2(2)          | S1-C1-C2-<br>C3 | 179.42(12)      |
| C1-C2-C3-<br>C4 | -0.6(2)         | C2-C3-C4-<br>C5 | 0.6(3)          |
| C3-C4-C5-<br>C6 | -0.1(2)         | C4-C5-C6-<br>C1 | -0.3(2)         |
| C4-C5-C6-<br>C7 | -<br>179.89(15) | C2-C1-C6-<br>C5 | 0.2(2)          |
| S1-C1-C6-<br>C5 | -<br>179.05(12) | C2-C1-C6-<br>C7 | 179.87(14)      |
| S1-C1-C6-<br>C7 | 0.57(17)        | C8-N1-C7-<br>C6 | -<br>176.10(13) |
| S1-N1-C7-<br>C6 | -1.72(16)       | C5-C6-C7-<br>N1 | -<br>179.75(14) |
| C1-C6-C7-       | 0.65(18)        | C7-N1-C8-       | -4.2(2)         |

|            |            |           |            |
|------------|------------|-----------|------------|
| N1         |            | C9        |            |
| S1-N1-C8-  | -          | N1-C8-C9- | -          |
| C9         | 178.34(13) | C10       | 178.09(14) |
| C8-C9-C10- | 174.21(17) |           |            |
| O3         |            |           |            |

### Table 7. Anisotropic atomic displacement parameters ( $\text{\AA}^2$ ) for 10.

The anisotropic atomic displacement factor exponent takes the form:  $-2\pi^2 [ h^2 a^{*2} U_{11} + \dots + 2 h k a^* b^* U_{12} ]$

|     | $U_{11}$  | $U_{22}$  | $U_{33}$  | $U_{23}$    | $U_{13}$    | $U_{12}$    |
|-----|-----------|-----------|-----------|-------------|-------------|-------------|
| S1  | 0.0219(2) | 0.0340(2) | 0.0193(2) | 0.00758(15) | 0.00075(15) | 0.00340(15) |
| O1  | 0.0330(6) | 0.0386(7) | 0.0392(7) | -0.0205(5)  | -0.0117(6)  | 0.0019(5)   |
| O2  | 0.0356(7) | 0.0579(8) | 0.0269(7) | 0.0005(6)   | 0.0066(6)   | -0.0116(6)  |
| N1  | 0.0183(6) | 0.0383(7) | 0.0212(6) | -0.0118(5)  | 0.0004(5)   | -0.0054(5)  |
| C1  | 0.0215(7) | 0.0237(7) | 0.0221(7) | -0.0048(5)  | 0.0003(6)   | -0.0050(5)  |
| C2  | 0.0293(8) | 0.0281(7) | 0.0240(8) | -0.0032(6)  | -0.0057(7)  | -0.0040(6)  |
| C3  | 0.0239(7) | 0.0259(7) | 0.0352(9) | -0.0048(6)  | -0.0066(7)  | -0.0008(6)  |
| C4  | 0.0228(7) | 0.0278(7) | 0.0358(9) | -0.0135(7)  | 0.0019(7)   | -0.0027(6)  |
| C5  | 0.0254(8) | 0.0313(8) | 0.0287(8) | -0.0131(6)  | 0.0009(7)   | -0.0076(6)  |
| C6  | 0.0211(7) | 0.0254(7) | 0.0244(7) | -0.0069(6)  | -0.0008(6)  | -0.0082(5)  |
| C7  | 0.0206(7) | 0.0375(8) | 0.0228(7) | -0.0118(6)  | 0.0003(6)   | -0.0081(6)  |
| C8  | 0.0205(7) | 0.0292(7) | 0.0266(8) | -0.0082(6)  | 0.0023(6)   | -0.0077(6)  |
| C9  | 0.0220(7) | 0.0300(7) | 0.0276(8) | -0.0096(6)  | 0.0007(6)   | -0.0070(6)  |
| C10 | 0.0243(8) | 0.0332(8) | 0.0337(9) | -0.0079(7)  | -0.0013(7)  | -0.0059(6)  |
| O3  | 0.0268(6) | 0.0544(8) | 0.0436(8) | -0.0110(6)  | -0.0111(6)  | -0.0021(6)  |

### Table 8. Hydrogen atomic coordinates and isotropic atomic displacement parameters ( $\text{\AA}^2$ ) for 10.

| x/a | y/b | z/c | U(eq) |
|-----|-----|-----|-------|
|-----|-----|-----|-------|

|     | x/a     | y/b    | z/c    | U(eq) |
|-----|---------|--------|--------|-------|
| H2  | 0.1962  | 0.8166 | 0.5508 | 0.035 |
| H3  | -0.1288 | 0.9915 | 0.6644 | 0.036 |
| H4  | -0.1145 | 1.0048 | 0.8611 | 0.036 |
| H5  | 0.2248  | 0.8491 | 0.9481 | 0.034 |
| H7A | 0.6986  | 0.7266 | 0.8672 | 0.032 |
| H7B | 0.6423  | 0.5220 | 0.9101 | 0.032 |
| H8  | 1.0887  | 0.3793 | 0.6734 | 0.031 |
| H9  | 1.0544  | 0.4309 | 0.9091 | 0.032 |
| H10 | 1.4253  | 0.2084 | 0.7570 | 0.038 |

## Computational Details

All calculations have been performed at Density Functional Theory (DFT)<sup>i</sup> level using Gaussian 16<sup>ii</sup> software. All structural optimizations and subsequent harmonic frequency calculations confirming the nature of the stationary points as minima or first order transition states have been performed using the PBE0<sup>iii</sup> global hybrid exchange and correlation functional and the 6-311++G(d,p) Pople basis set. Bulk solvent effects (methanol) were considering using the conductor-like polarizable continuum model (CPCM)<sup>iv</sup>. The above described level of theory applies to all data reported.

---

<sup>i</sup> Parr GR, Yang W (1989) Density-Functional Theory of Atoms and Molecules Oxford University Press, USA.

<sup>ii</sup> Frisch MJ, Trucks GW, Schlegel HB, Scuseria GE, Robb MA, Cheeseman JR, Scalmani G, Barone V, Petersson GA, Nakatsuji H, Li X, Caricato M, Marenich AV, Bloino J, Janesko BG, Gomperts R, Mennucci B, Hratchian HP, Ortiz JV, Izmaylov AF, Sonnenberg JL, Williams-Young D, Ding F, Lipparini F, Egidi F, Goings J, Peng B, Petrone A, Henderson T, Ranasinghe D, Zakrzewski VG, Gao J, Rega N, Zheng G, Liang W, Hada M, Ehara M, Toyota K, Fukuda R, Hasegawa J, Ishida M, Nakajima T, Honda Y, Kitao O, Nakai H, Vreven T, Throssell K, Montgomery JA Jr, Peralta JE, Ogliaro F, Bearpark MJ, Heyd JJ, Brothers EN, Kudin KN, Staroverov VN, Keith TA, Kobayashi R, Normand J, Raghavachari K, Rendell AP, Burant JC, Iyengar SS, Tomasi J, Cossi M, Millam JM, Klene M, Adamo C, Cammi R, Ochterski JW, Martin RL, Morokuma K, Farkas O, Foresman JB, Fox DJ Gaussian Inc Wallingford CT 2016.

<sup>iii</sup> Adamo C, Barone V, J. (1999) Chem. Phys. 110, 6158.

<sup>iv</sup> Barone V, Cossi M (1998) J. Phys. Chem. (A) 102, 1995-2001.

## 1. Energy profiles

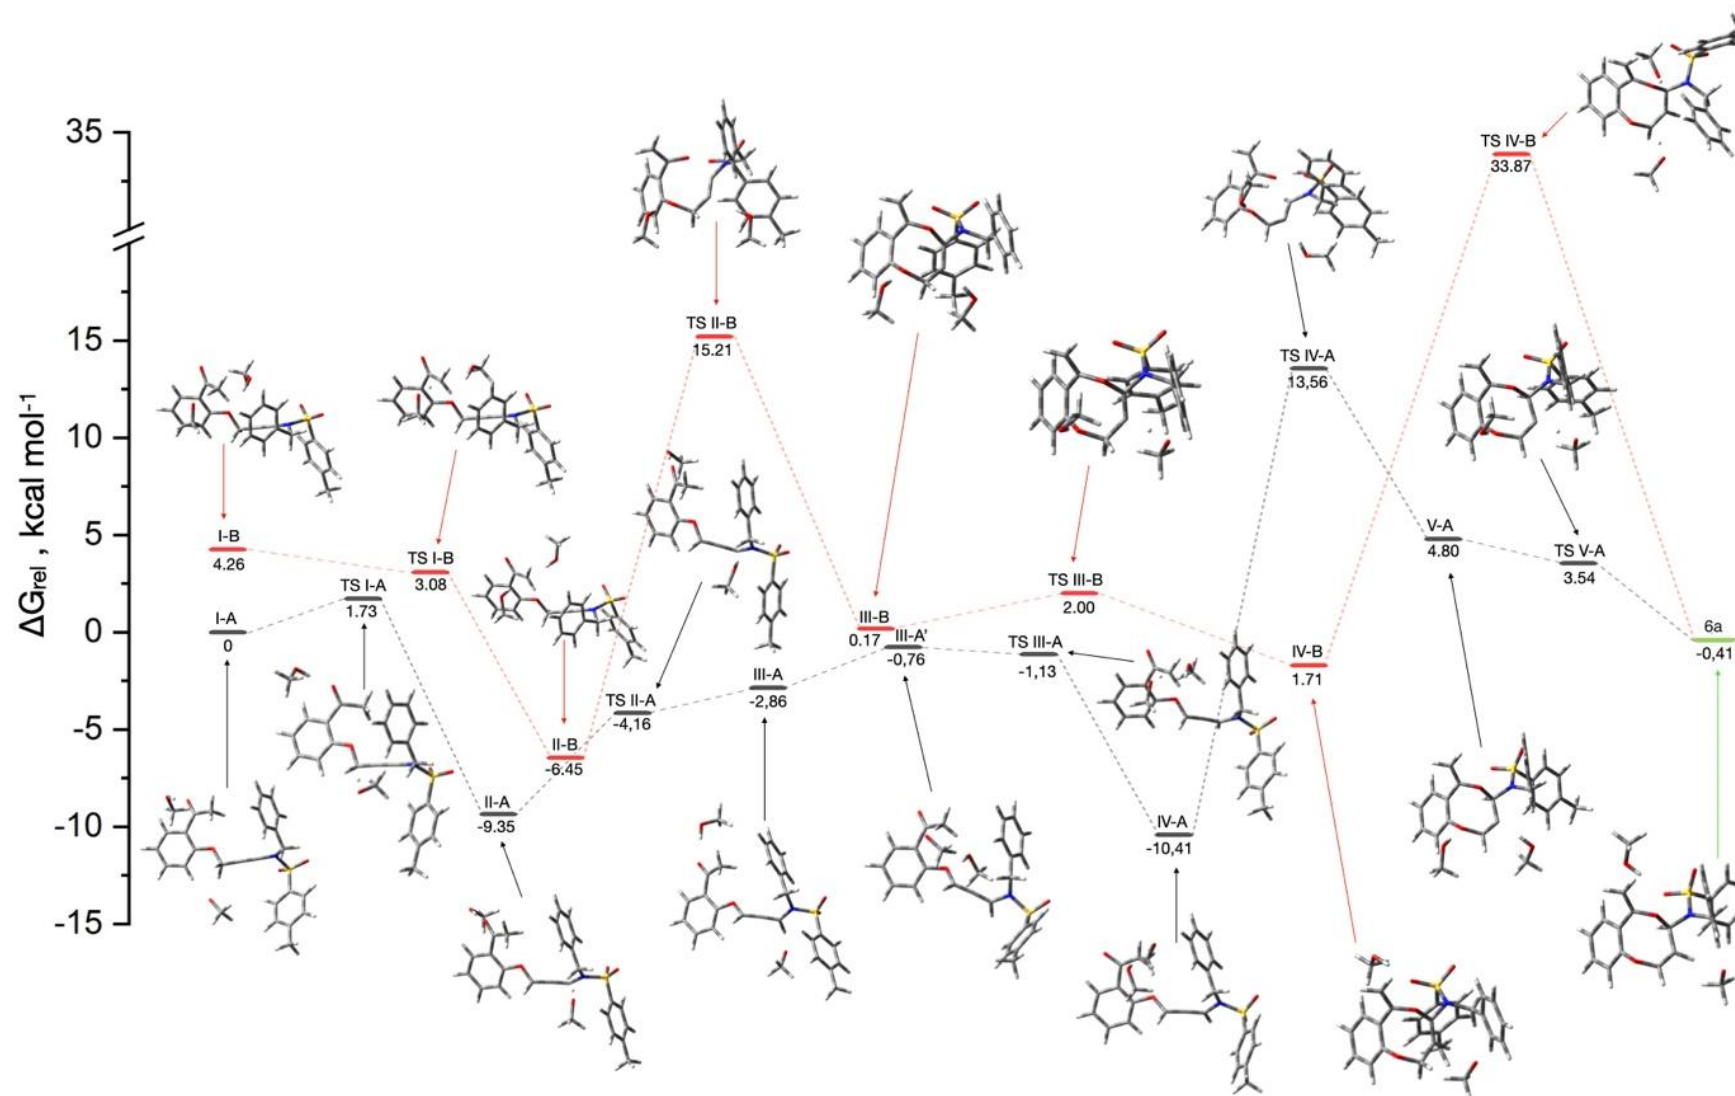

**Figure 1.** Computed energy profiles ( $\Delta G$  in kcal/mol) for the reaction pathways A and B.



**Figure 2.** Computed energy profiles ( $\Delta E$ , kcal/mol) for the reaction pathways A and B.

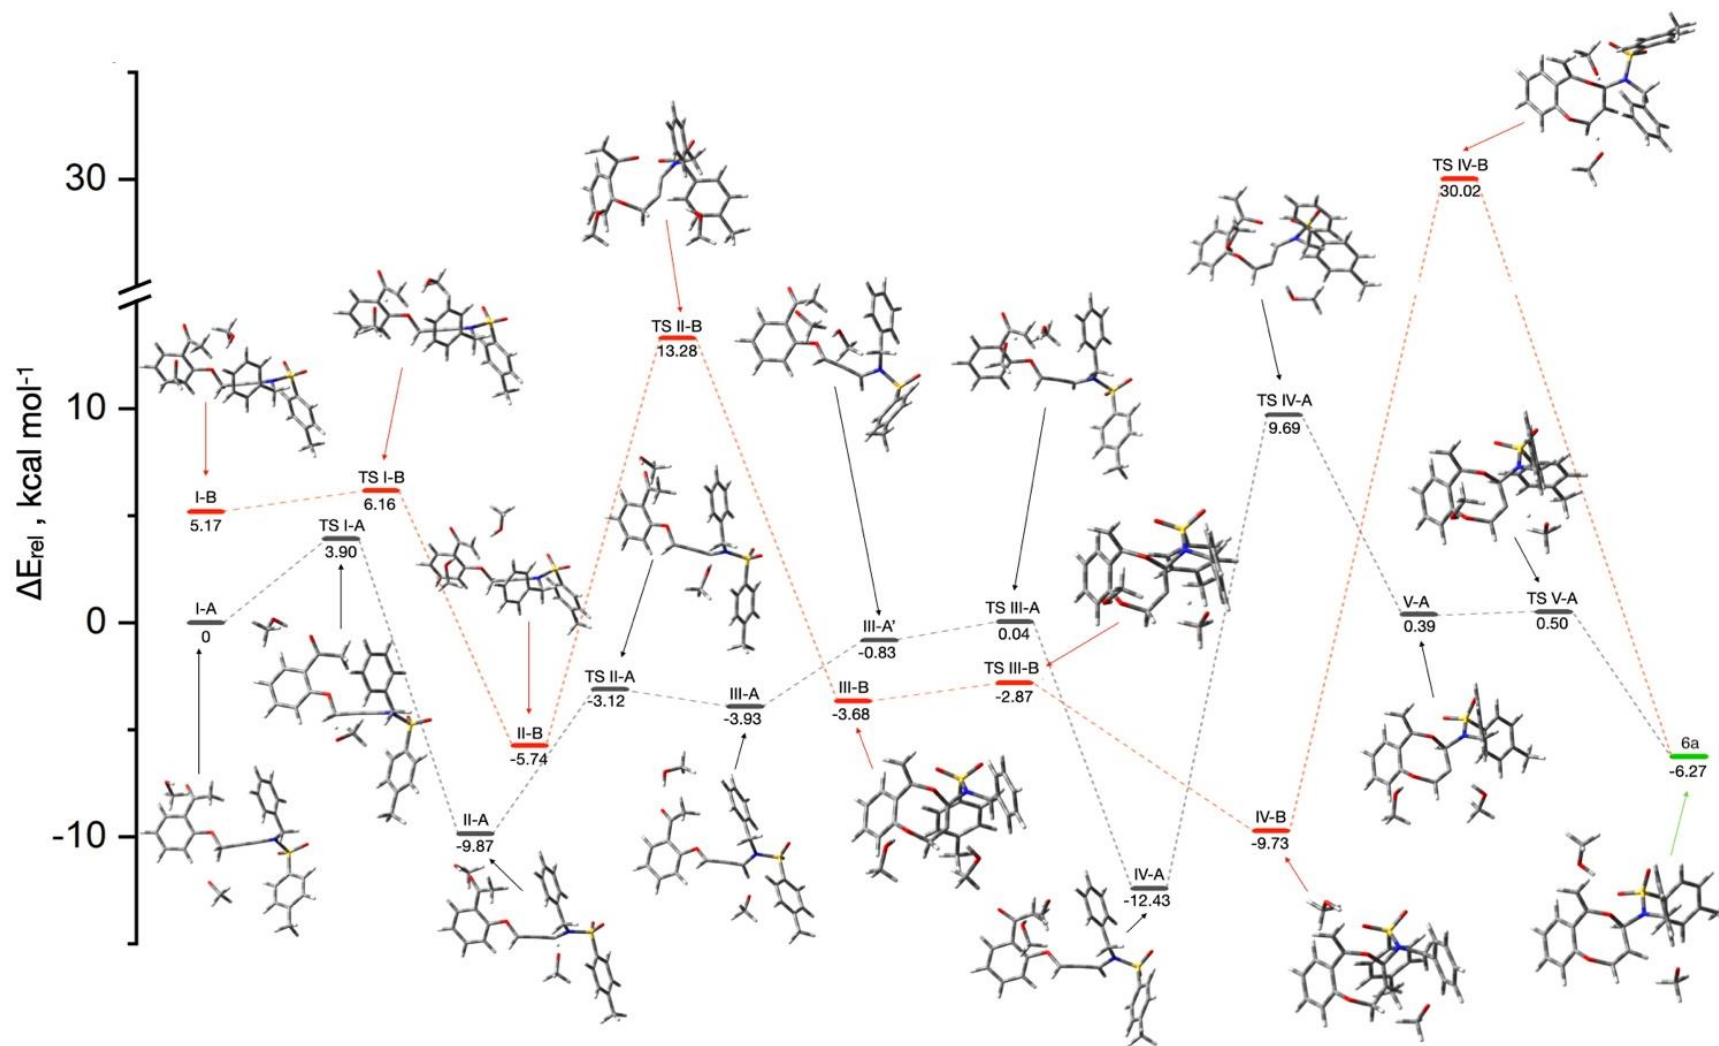

**Figure 3.** Computed energy profiles ( $\Delta H$ , kcal/mol) for the reaction pathways A and B.

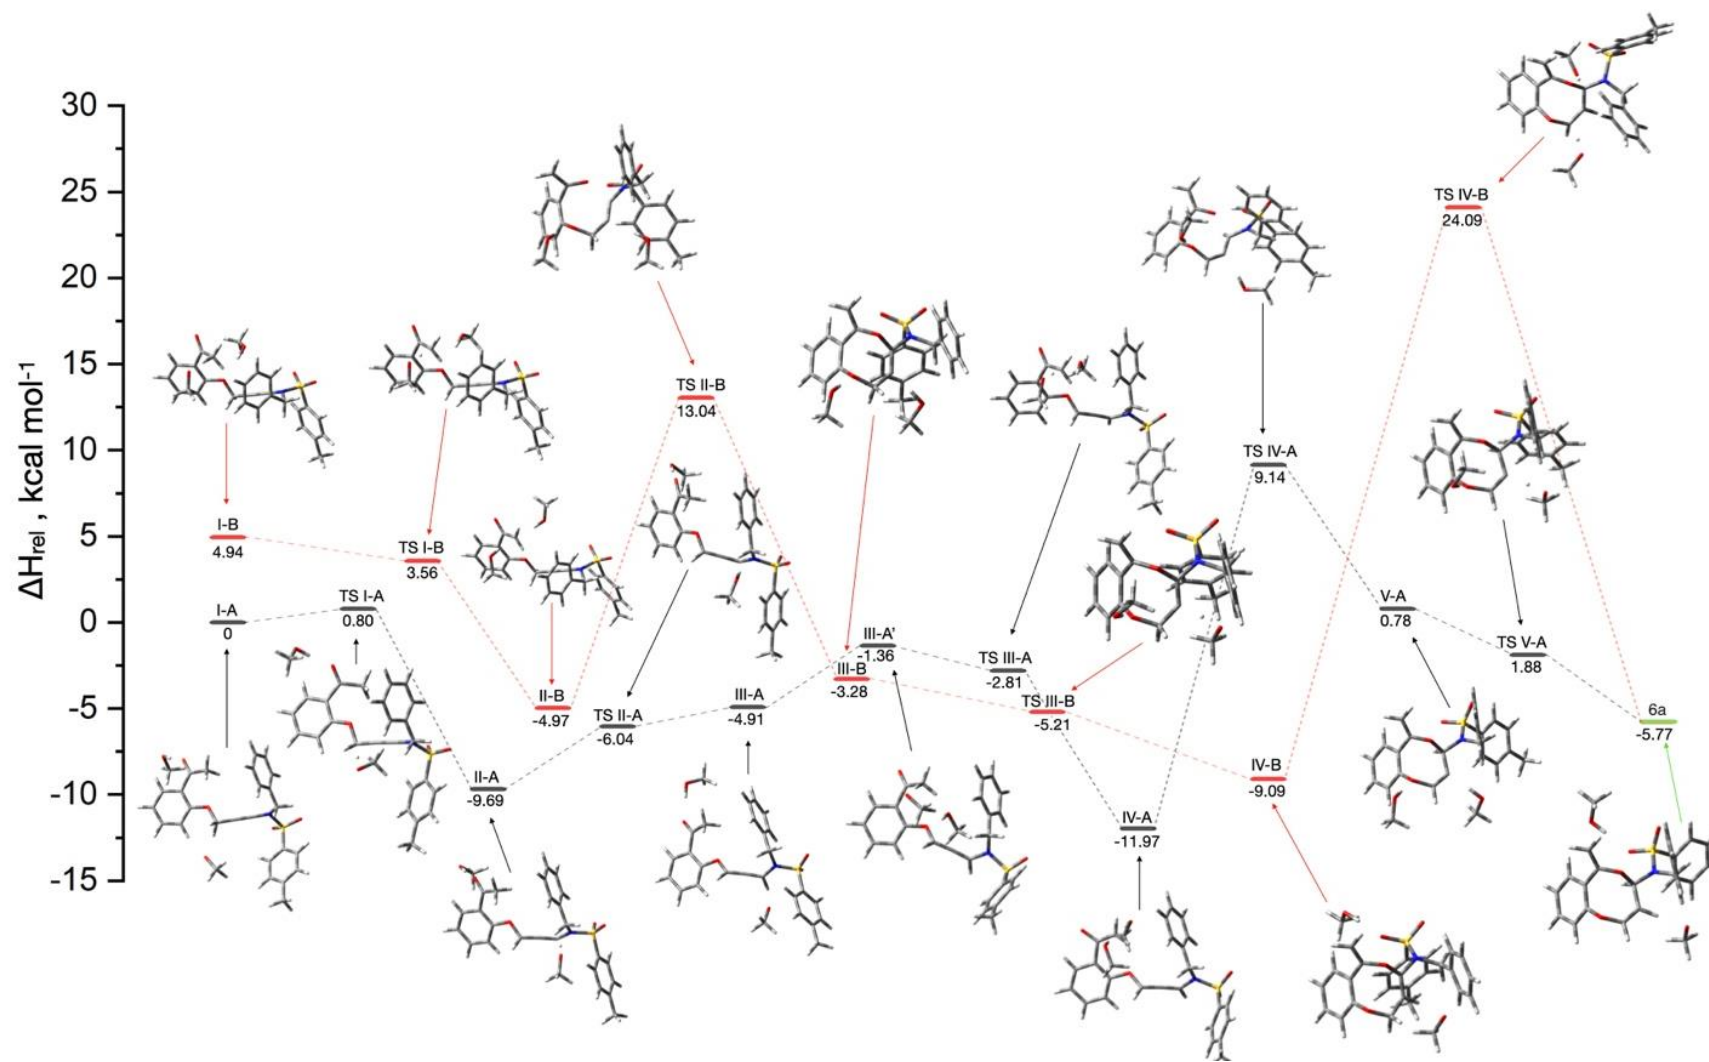

## 2. Geometries

**Table 1.** Optimized geometry and related energy for **I A** compound.

|   |             |             |             |
|---|-------------|-------------|-------------|
| C | 4.55183500  | 0.84615900  | -0.26782000 |
| C | 3.45022000  | 1.80643700  | -0.60383000 |
| H | 3.87519500  | 2.80724000  | -0.68795300 |
| H | 2.92513300  | 1.52513700  | -1.51762200 |
| H | 2.70936400  | 1.79839700  | 0.20089600  |
| O | 5.59641400  | 1.28124400  | 0.20881000  |
| C | 4.41848500  | -0.60614200 | -0.54709200 |
| C | 3.18770200  | -1.29353300 | -0.61983900 |
| C | 5.60108500  | -1.32385600 | -0.77224900 |
| C | 3.16331100  | -2.66036200 | -0.91715000 |
| C | 5.58195300  | -2.67040400 | -1.08748600 |
| H | 6.54161500  | -0.78631600 | -0.71964000 |
| C | 4.35566800  | -3.33022000 | -1.15357300 |
| H | 2.21663000  | -3.20707600 | -0.90428500 |
| H | 6.50738200  | -3.20203500 | -1.27944600 |
| H | 4.32451900  | -4.39130800 | -1.38315300 |
| O | 2.07202200  | -0.59163700 | -0.33384200 |
| C | -0.24722300 | -0.25190200 | -0.31887400 |
| C | -1.13703100 | 0.45189400  | 0.09567100  |
| N | -2.11171700 | 1.26470600  | 0.52972700  |
| C | -2.60642400 | 2.32103000  | -0.38048700 |
| H | -3.41085000 | 2.83382400  | 0.14994900  |
| H | -3.01764300 | 1.86680900  | -1.28721000 |
| C | -1.50684000 | 3.28907100  | -0.72541400 |
| C | -1.11172700 | 3.46187000  | -2.04945600 |
| C | -0.88060900 | 4.03398300  | 0.27569000  |
| C | -0.10825200 | 4.37155100  | -2.37411100 |
| H | -1.59098200 | 2.88168900  | -2.83276700 |
| C | 0.12358500  | 4.93792200  | -0.04543700 |
| H | -1.18012900 | 3.89955500  | 1.31113400  |
| C | 0.51168300  | 5.10959500  | -1.37283400 |
| H | 0.19077300  | 4.49802300  | -3.40962400 |
| H | 0.60345100  | 5.51311200  | 0.73986600  |
| H | 1.29573900  | 5.81694500  | -1.62311200 |
| S | -3.16909500 | 0.62960400  | 1.70773100  |
| O | -2.32596500 | -0.10716700 | 2.63131000  |
| O | -3.96183300 | 1.76095100  | 2.16098000  |
| C | -4.22388200 | -0.50815500 | 0.86245500  |
| C | -3.79113400 | -1.81657800 | 0.66478000  |
| C | -5.44563900 | -0.06448700 | 0.36489700  |
| C | -4.60429200 | -2.68821300 | -0.04405800 |
| H | -2.83885800 | -2.14835000 | 1.06193700  |
| C | -6.24421900 | -0.95524700 | -0.33721800 |
| H | -5.76891200 | 0.95606900  | 0.53514200  |
| C | -5.83913000 | -2.27566800 | -0.55306500 |

|   |             |             |             |
|---|-------------|-------------|-------------|
| H | -4.27124500 | -3.70915100 | -0.20343700 |
| H | -7.20086700 | -0.61803000 | -0.72385700 |
| C | -6.72313400 | -3.23674100 | -1.28865200 |
| H | -7.39371000 | -3.74804800 | -0.58918900 |
| H | -7.34639800 | -2.72208300 | -2.02296100 |
| H | -6.13768500 | -4.00324100 | -1.80069500 |
| C | 0.80563700  | -1.12059300 | -0.78389900 |
| H | 0.81905900  | -1.15294600 | -1.88114200 |
| H | 0.64578400  | -2.16499000 | -0.41615900 |
| C | -0.81585400 | -4.21309700 | -0.61621300 |
| H | -1.28064200 | -3.30841000 | -1.08378600 |
| H | -1.53998800 | -4.51659200 | 0.17794600  |
| H | -0.90559600 | -5.00614000 | -1.39606300 |
| O | 0.45935400  | -4.00707200 | -0.16772700 |
| C | 6.92104400  | -0.69341500 | 2.78558300  |
| H | 7.67908500  | -1.07924100 | 3.47082000  |
| H | 6.15336400  | -0.18006900 | 3.37893100  |
| H | 6.45306400  | -1.54594900 | 2.27638900  |
| O | 7.56235200  | 0.17875300  | 1.87809900  |
| H | 6.89121000  | 0.52061500  | 1.26436000  |

Energy= -1949,67130285 Hartree

**Table 2.** Optimized geometry and related energy and frequency for transition state **TS I A**.

|   |             |             |             |
|---|-------------|-------------|-------------|
| C | 4.39623400  | -0.06541600 | 1.30451200  |
| C | 3.21079400  | 0.44225700  | 2.06854100  |
| H | 3.56584800  | 1.03486100  | 2.91209200  |
| H | 2.60234600  | 1.07119700  | 1.41203000  |
| H | 2.56375800  | -0.37020100 | 2.40297400  |
| O | 5.49360000  | 0.45529100  | 1.49904000  |
| C | 4.27169600  | -1.19943800 | 0.35929700  |
| C | 3.05596300  | -1.60479400 | -0.25097300 |
| C | 5.44094000  | -1.91779400 | 0.07264900  |
| C | 3.06333200  | -2.71777000 | -1.10751200 |
| C | 5.44098900  | -3.01368600 | -0.77027400 |
| H | 6.35980900  | -1.59924700 | 0.55280200  |
| C | 4.23811400  | -3.40791900 | -1.35574800 |
| H | 2.13720800  | -3.04718000 | -1.55798900 |
| H | 6.35673300  | -3.56124600 | -0.96253800 |
| H | 4.21196300  | -4.27057400 | -2.01473400 |
| O | 1.96678700  | -0.87889100 | -0.01505300 |
| C | -0.28316800 | -0.29422300 | -0.29687300 |
| C | -1.17991600 | 0.46382500  | 0.02211400  |
| N | -2.15925700 | 1.31601700  | 0.35986400  |
| C | -2.49469300 | 2.42262100  | -0.55863600 |
| H | -3.36286200 | 2.93278300  | -0.13668200 |
| H | -2.77057600 | 2.02048400  | -1.53861700 |
| C | -1.34232800 | 3.38258800  | -0.69022800 |
| C | -0.82746400 | 3.69422500  | -1.94601000 |

|   |             |             |             |
|---|-------------|-------------|-------------|
| C | -0.79155700 | 3.98926100  | 0.44007100  |
| C | 0.21783000  | 4.60557900  | -2.07579800 |
| H | -1.24532000 | 3.22052000  | -2.82977400 |
| C | 0.25439800  | 4.89425900  | 0.31363400  |
| H | -1.18265600 | 3.74375500  | 1.42318100  |
| C | 0.76115000  | 5.20641400  | -0.94643700 |
| H | 0.61007300  | 4.83972600  | -3.06024700 |
| H | 0.67493300  | 5.36022300  | 1.19908100  |
| H | 1.57813300  | 5.91394700  | -1.04466200 |
| S | -3.37326900 | 0.71329200  | 1.39471800  |
| O | -2.67755700 | -0.00267900 | 2.45079500  |
| O | -4.22458500 | 1.85126600  | 1.71417100  |
| C | -4.30493200 | -0.45309300 | 0.44677700  |
| C | -3.86371800 | -1.77091300 | 0.36717600  |
| C | -5.43800800 | -0.02551800 | -0.23926500 |
| C | -4.57676500 | -2.66809000 | -0.41537400 |
| H | -2.98757800 | -2.09011300 | 0.91951800  |
| C | -6.13673200 | -0.94025300 | -1.01320000 |
| H | -5.77535600 | 1.00112100  | -0.15298900 |
| C | -5.71643500 | -2.26959600 | -1.11915400 |
| H | -4.24351600 | -3.69958900 | -0.47518200 |
| H | -7.02961300 | -0.61728100 | -1.53949500 |
| C | -6.46270800 | -3.24075800 | -1.98337600 |
| H | -7.52971300 | -3.00925800 | -2.01198900 |
| H | -6.09049200 | -3.19775600 | -3.01293300 |
| H | -6.33599400 | -4.26648400 | -1.63109900 |
| C | 0.69985200  | -1.26025300 | -0.63600500 |
| H | 0.84756900  | -1.30698300 | -1.72214600 |
| H | 0.29182600  | -2.49318000 | -0.22353600 |
| C | -0.35358500 | -3.50914400 | 1.52299300  |
| H | -0.27099100 | -2.46472600 | 1.88396800  |
| H | 0.34024300  | -4.10549200 | 2.14508000  |
| H | -1.37228000 | -3.84728000 | 1.78924300  |
| O | -0.09129600 | -3.61203400 | 0.16515800  |
| C | 7.40020100  | 1.08060500  | -1.36368700 |
| H | 8.29924600  | 1.27635300  | -1.95236000 |
| H | 6.74452900  | 1.95777100  | -1.43931800 |
| H | 6.88087300  | 0.22077900  | -1.80678800 |
| O | 7.80049700  | 0.82963700  | -0.03274800 |
| H | 7.00248700  | 0.64971800  | 0.49239300  |

Energy= -1949,66508871 Hartree  
Frequency= 1119,82i cm<sup>-1</sup>

**Table 3.** Optimized geometry and related energy for **II A** compound.

|   |            |            |             |
|---|------------|------------|-------------|
| C | 4.90958100 | 0.25375700 | -0.65167600 |
| C | 4.20233300 | 1.38412900 | -1.33660500 |
| H | 4.91165000 | 2.19940000 | -1.48392700 |
| H | 3.75709500 | 1.07560800 | -2.28337100 |

|   |             |             |             |
|---|-------------|-------------|-------------|
| H | 3.38324600  | 1.73652300  | -0.70188400 |
| O | 5.94943600  | 0.48228000  | -0.03971000 |
| C | 4.40024400  | -1.13733600 | -0.74510500 |
| C | 3.04772500  | -1.47328300 | -0.97413600 |
| C | 5.33529700  | -2.17274500 | -0.61533500 |
| C | 2.67753000  | -2.81889600 | -1.07251600 |
| C | 4.97052500  | -3.50247700 | -0.72905800 |
| H | 6.37198000  | -1.90304300 | -0.44526500 |
| C | 3.63167400  | -3.81753200 | -0.95584700 |
| H | 1.63335200  | -3.06815700 | -1.21850700 |
| H | 5.71577200  | -4.28539000 | -0.64511700 |
| H | 3.32308200  | -4.85527600 | -1.03565400 |
| O | 2.15352800  | -0.47147600 | -1.03549300 |
| C | -0.21153500 | -0.36426600 | -0.85070300 |
| C | -1.24978900 | -0.11415400 | -0.10445200 |
| N | -1.90276700 | 1.11868600  | -0.15203200 |
| C | -1.50464300 | 2.20913900  | -1.03365800 |
| H | -2.34604000 | 2.89816500  | -1.13988300 |
| H | -1.31202200 | 1.76693900  | -2.01737500 |
| C | -0.28420000 | 2.97265200  | -0.57156700 |
| C | 0.40415200  | 3.76616400  | -1.49127400 |
| C | 0.15713600  | 2.93842400  | 0.74874000  |
| C | 1.50433700  | 4.51898000  | -1.09718400 |
| H | 0.07575600  | 3.79391800  | -2.52720400 |
| C | 1.26126300  | 3.68850600  | 1.14528900  |
| H | -0.36209700 | 2.31484800  | 1.46992700  |
| C | 1.93792200  | 4.48249800  | 0.22554400  |
| H | 2.02776800  | 5.13088500  | -1.82528600 |
| H | 1.59473800  | 3.64865000  | 2.17770100  |
| H | 2.79967500  | 5.06526400  | 0.53473600  |
| S | -3.19566600 | 1.29554400  | 0.87573900  |
| O | -2.81144200 | 1.02640700  | 2.25847700  |
| O | -3.77682500 | 2.60813700  | 0.58486100  |
| C | -4.35191200 | 0.03582700  | 0.38815200  |
| C | -4.95991400 | -0.74123100 | 1.36303800  |
| C | -4.70294900 | -0.08930800 | -0.95292400 |
| C | -5.93201600 | -1.66054700 | 0.98443400  |
| H | -4.67020600 | -0.63184100 | 2.40154100  |
| C | -5.67026800 | -1.01362500 | -1.31311900 |
| H | -4.22042800 | 0.52204000  | -1.70849200 |
| C | -6.30006500 | -1.81396200 | -0.35239600 |
| H | -6.41007300 | -2.27059900 | 1.74475300  |
| H | -5.94381000 | -1.11690800 | -2.35889800 |
| C | -7.32879400 | -2.82584000 | -0.76058700 |
| H | -8.01813800 | -2.41253700 | -1.50143500 |
| H | -6.84970100 | -3.69924800 | -1.21603100 |
| H | -7.90800500 | -3.17307900 | 0.09712700  |
| C | 0.84908200  | -0.75394700 | -1.52065100 |
| H | 0.85746300  | -1.22333100 | -2.50059000 |
| C | -2.30100300 | -3.42473400 | 0.53846800  |
| H | -3.28833300 | -3.07937500 | 0.20049700  |

|   |             |             |             |
|---|-------------|-------------|-------------|
| H | -2.44106400 | -4.36818400 | 1.07458300  |
| H | -1.68983400 | -3.63206300 | -0.35223400 |
| O | -1.68495900 | -2.50542100 | 1.40634400  |
| H | -1.59599800 | -1.63615100 | 0.91828200  |
| C | 6.20039900  | -1.20587000 | 3.01908700  |
| H | 6.68940300  | -1.63670100 | 3.89560600  |
| H | 5.55008500  | -0.38889900 | 3.35747500  |
| H | 5.57292500  | -1.98128300 | 2.56063500  |
| O | 7.20924900  | -0.75261200 | 2.14031500  |
| H | 6.77721500  | -0.37013500 | 1.35859500  |

Energy= -1949,68702603 Hartree

**Table 4.** Optimized geometry and related energy and frequency for transition state **TS II A**.

|   |             |             |             |
|---|-------------|-------------|-------------|
| C | 4.93847500  | 0.34930400  | -0.63322800 |
| C | 4.11057400  | 1.43077000  | -1.25765200 |
| H | 4.74919800  | 2.29507600  | -1.44288700 |
| H | 3.62662500  | 1.09845000  | -2.17705000 |
| H | 3.31398900  | 1.72218200  | -0.56597300 |
| O | 5.99447100  | 0.64105100  | -0.08224600 |
| C | 4.52364500  | -1.07616800 | -0.71723200 |
| C | 3.18831500  | -1.50742600 | -0.84024100 |
| C | 5.53657100  | -2.04251000 | -0.69234100 |
| C | 2.90097000  | -2.87016100 | -0.93615200 |
| C | 5.25594000  | -3.39297000 | -0.80985500 |
| H | 6.56260300  | -1.70275700 | -0.60290900 |
| C | 3.92973800  | -3.80082700 | -0.92928800 |
| H | 1.86888900  | -3.19602600 | -0.98989200 |
| H | 6.05874400  | -4.12149400 | -0.80819600 |
| H | 3.68865300  | -4.85610200 | -1.00728400 |
| O | 2.21620600  | -0.56779300 | -0.79266700 |
| C | -0.13657200 | -0.52362500 | -0.65890800 |
| C | -1.23442200 | -0.26085400 | 0.00679600  |
| N | -1.92462800 | 0.94654900  | -0.16137300 |
| C | -1.45915900 | 1.95357200  | -1.10508000 |
| H | -2.29830900 | 2.60879000  | -1.34720200 |
| H | -1.17967400 | 1.42427100  | -2.02214500 |
| C | -0.29575200 | 2.78918700  | -0.61951500 |
| C | 0.41736200  | 3.54801600  | -1.54951600 |
| C | 0.06184600  | 2.86117500  | 0.72398400  |
| C | 1.46181300  | 4.36979800  | -1.14309600 |
| H | 0.15183000  | 3.49501600  | -2.60227200 |
| C | 1.11187800  | 3.67966500  | 1.13262400  |
| H | -0.47861700 | 2.27091600  | 1.45752100  |
| C | 1.81365100  | 4.43832800  | 0.20247400  |
| H | 2.00562700  | 4.95403600  | -1.87882000 |
| H | 1.38113400  | 3.72243500  | 2.18338500  |
| H | 2.63201800  | 5.07560300  | 0.52163800  |
| S | -3.25455900 | 1.25060500  | 0.80082100  |



|   |             |             |             |
|---|-------------|-------------|-------------|
| O | -2.91960400 | 1.05397300  | 2.20479900  |
| O | -3.73780100 | 2.56639600  | 0.38875000  |
| C | -4.45725000 | 0.03075400  | 0.33996800  |
| C | -5.14301000 | -0.65232200 | 1.33399200  |
| C | -4.76261000 | -0.15324800 | -1.00505000 |
| C | -6.15234400 | -1.53437400 | 0.96937600  |
| H | -4.88493600 | -0.49863500 | 2.37501200  |
| C | -5.76862400 | -1.04192600 | -1.35006600 |
| H | -4.22029000 | 0.38520300  | -1.77529900 |
| C | -6.47882400 | -1.74567400 | -0.37104400 |
| H | -6.69340500 | -2.07013100 | 1.74324200  |
| H | -6.00910000 | -1.19129200 | -2.39824900 |
| C | -7.54598000 | -2.72472400 | -0.75905900 |
| H | -8.11552000 | -2.37039800 | -1.62158700 |
| H | -7.10015200 | -3.68638900 | -1.03606400 |
| H | -8.23817000 | -2.90676300 | 0.06541600  |
| C | 0.94657400  | -0.90522900 | -1.27800700 |
| H | 0.96949900  | -1.42627700 | -2.23242000 |
| C | -2.52286700 | -3.20562300 | 0.67451800  |
| H | -2.59127100 | -2.81412800 | -0.36655400 |
| H | -3.56477100 | -3.46944800 | 0.95454500  |
| H | -1.98240100 | -4.17286400 | 0.58819900  |
| O | -1.92516400 | -2.31763200 | 1.53741500  |
| H | -1.63470700 | -1.13327800 | 0.76966200  |
| C | 6.55717900  | -1.11166400 | 2.91001200  |
| H | 7.13074100  | -1.53479100 | 3.73760200  |
| H | 5.87717000  | -0.35273400 | 3.31787500  |
| H | 5.95464900  | -1.91399300 | 2.46467800  |
| O | 7.47374700  | -0.56210500 | 1.98594700  |
| H | 6.96777300  | -0.18859700 | 1.24603900  |

Energy= -1949,67628161 Hartree  
Frequency= 337,40i cm<sup>-1</sup>

**Table 5.** Optimized geometry and related energy for **III A** compound.

|   |             |             |             |
|---|-------------|-------------|-------------|
| C | -4.93818800 | 0.74517100  | -0.23376300 |
| C | -4.24358800 | -0.40269200 | -0.90053000 |
| H | -4.97932600 | -1.17123100 | -1.13965800 |
| H | -3.71162800 | -0.08585100 | -1.79894100 |
| H | -3.49355200 | -0.82329500 | -0.22400100 |
| O | -6.06677200 | 0.59599000  | 0.22359700  |
| C | -4.30490200 | 2.08851600  | -0.15262300 |
| C | -2.92435500 | 2.33552100  | -0.28197900 |
| C | -5.15715400 | 3.18210000  | 0.04723900  |
| C | -2.43736800 | 3.64203200  | -0.22326000 |
| C | -4.68017200 | 4.48020500  | 0.08787400  |
| H | -6.21703200 | 2.97889200  | 0.15187100  |
| C | -3.31223700 | 4.70407300  | -0.04944900 |
| H | -1.36977600 | 3.81772500  | -0.28629200 |



|   |             |             |             |
|---|-------------|-------------|-------------|
| H | -5.36290800 | 5.31077900  | 0.22672400  |
| H | -2.91698700 | 5.71384200  | -0.00738100 |
| O | -2.09469700 | 1.26981000  | -0.39334800 |
| C | 0.22279100  | 0.87979000  | -0.42520900 |
| C | 1.30249900  | 0.37282400  | 0.11906100  |
| N | 1.79180600  | -0.89481300 | -0.22388300 |
| C | 1.11047400  | -1.70503500 | -1.22424300 |
| H | 1.81931100  | -2.44446400 | -1.60151400 |
| H | 0.86018800  | -1.03758600 | -2.05544200 |
| C | -0.13560500 | -2.40956500 | -0.73478400 |
| C | -0.99572400 | -2.97505400 | -1.67813400 |
| C | -0.43328900 | -2.55024200 | 0.61766300  |
| C | -2.12631700 | -3.67604300 | -1.27644800 |
| H | -0.77715800 | -2.86694900 | -2.73739700 |
| C | -1.56894800 | -3.24775800 | 1.02203500  |
| H | 0.22154700  | -2.11080900 | 1.36365200  |
| C | -2.41746800 | -3.81499600 | 0.07816500  |
| H | -2.78393300 | -4.11104400 | -2.02249400 |
| H | -1.78911800 | -3.34635300 | 2.08041100  |
| H | -3.30195100 | -4.35875500 | 0.39413000  |
| S | 3.08666600  | -1.52106300 | 0.62593800  |
| O | 2.86306900  | -1.37545700 | 2.05762400  |
| O | 3.28574900  | -2.86421900 | 0.09105000  |
| C | 4.47177800  | -0.50605400 | 0.17954900  |
| C | 5.42680300  | -0.22503500 | 1.14959700  |
| C | 4.63793600  | -0.09289600 | -1.13749800 |
| C | 6.56151300  | 0.48777600  | 0.78782600  |
| H | 5.27839200  | -0.55174300 | 2.17232800  |
| C | 5.77675700  | 0.62203600  | -1.47829700 |
| H | 3.88672300  | -0.31502800 | -1.88779100 |
| C | 6.75348600  | 0.92503800  | -0.52507800 |
| H | 7.31031000  | 0.71030200  | 1.54173000  |
| H | 5.90871000  | 0.95206500  | -2.50404800 |
| C | 7.96408300  | 1.72697800  | -0.89737100 |
| H | 8.23628800  | 1.57413700  | -1.94391200 |
| H | 7.76918600  | 2.79652200  | -0.76131200 |
| H | 8.82059400  | 1.46814400  | -0.27120200 |
| C | -0.82215300 | 1.47749100  | -0.92327700 |
| H | -0.81072500 | 2.10557600  | -1.81151500 |
| H | 1.86186600  | 1.01670000  | 0.88513000  |
| C | 2.98870400  | 3.16039300  | 0.94810400  |
| H | 4.08577700  | 3.30555400  | 1.08885100  |
| H | 2.55837600  | 4.18853700  | 0.98295800  |
| H | 2.88075800  | 2.84607800  | -0.11965700 |
| O | 2.41883000  | 2.28516800  | 1.83218000  |
| C | -6.96515400 | -2.61941400 | 1.23220700  |
| H | -7.52279000 | -3.55858300 | 1.24109700  |
| H | -7.03823200 | -2.16909500 | 2.23066200  |
| H | -5.91034300 | -2.85140000 | 1.03384700  |
| O | -7.52469100 | -1.79267800 | 0.23330300  |
| H | -7.01898500 | -0.96183900 | 0.21183600  |

Energy= -1949,67756249 Hartree

**Table 6.** Optimized geometry and related energy for **III A'** compound.

|   |             |             |             |
|---|-------------|-------------|-------------|
| C | -4.88912200 | 0.04630500  | 0.70926800  |
| C | -3.85482100 | 0.43950600  | 1.69906800  |
| H | -3.64139700 | -0.43842300 | 2.36849000  |
| H | -2.91151600 | 0.69781100  | 1.21652000  |
| H | -4.21999900 | 1.28395100  | 2.28608600  |
| O | -5.99823300 | 0.56067100  | 0.69008800  |
| C | -4.63072400 | -1.11142500 | -0.21808300 |
| C | -3.39429100 | -1.45361100 | -0.78067000 |
| C | -5.72628100 | -1.92839500 | -0.51600200 |
| C | -3.26214400 | -2.57402700 | -1.59545100 |
| C | -5.60216500 | -3.06100000 | -1.30569700 |
| H | -6.68536000 | -1.65780000 | -0.08815300 |
| C | -4.36148400 | -3.38462300 | -1.84416300 |
| H | -2.30321800 | -2.79451600 | -2.05174500 |
| H | -6.46624900 | -3.68618300 | -1.50157300 |
| H | -4.24672600 | -4.25993500 | -2.47475400 |
| O | -2.32335200 | -0.60904100 | -0.58864700 |
| C | 0.01103100  | -0.57483300 | -0.87202100 |
| C | 1.11327100  | -0.02237700 | -1.31487100 |
| N | 1.92831100  | 0.85225500  | -0.58546900 |
| C | 1.60194700  | 1.12406000  | 0.81173800  |
| H | 2.52088700  | 1.42547800  | 1.32117000  |
| H | 1.25724800  | 0.19684800  | 1.28211800  |
| C | 0.56951900  | 2.21470900  | 0.97657400  |
| C | -0.27412100 | 2.19163600  | 2.08648300  |
| C | 0.48495400  | 3.27995400  | 0.08216800  |
| C | -1.18192700 | 3.22238400  | 2.30532300  |
| H | -0.22439200 | 1.35936200  | 2.78335400  |
| C | -0.42759500 | 4.30768900  | 0.29630900  |
| H | 1.13366100  | 3.30183500  | -0.78756100 |
| C | -1.26152100 | 4.28426400  | 1.40996900  |
| H | -1.83450400 | 3.18979300  | 3.17188900  |
| H | -0.48649000 | 5.12998100  | -0.40979500 |
| H | -1.97349900 | 5.08626400  | 1.57599600  |
| S | 3.53004500  | 1.01702400  | -1.07751000 |
| O | 3.51225600  | 0.87213700  | -2.52487400 |
| O | 4.01042900  | 2.24199100  | -0.46015400 |
| C | 4.42611000  | -0.34162700 | -0.38188800 |
| C | 4.38979600  | -1.57887700 | -1.02261900 |
| C | 5.11946300  | -0.16578000 | 0.80982700  |
| C | 5.05932200  | -2.64815100 | -0.45110000 |
| H | 3.86034400  | -1.69827100 | -1.96123400 |
| C | 5.78471900  | -1.25172300 | 1.36500800  |
| H | 5.15224800  | 0.80730700  | 1.28617700  |
| C | 5.76369800  | -2.50445100 | 0.75020900  |

|   |             |             |             |
|---|-------------|-------------|-------------|
| H | 5.04029100  | -3.61273800 | -0.94897200 |
| H | 6.33352100  | -1.11891000 | 2.29189500  |
| C | 6.48479400  | -3.67353200 | 1.34995000  |
| H | 6.96268400  | -3.40605600 | 2.29375300  |
| H | 5.79504600  | -4.50210500 | 1.53628400  |
| H | 7.25639400  | -4.04441900 | 0.66832900  |
| C | -1.07342400 | -1.19254600 | -0.49951800 |
| H | -1.07199600 | -2.17933800 | -0.04203900 |
| H | 1.45141000  | -0.19424500 | -2.33318400 |
| C | -1.77799600 | -1.90830800 | 3.36255000  |
| H | -1.37160300 | -1.08460400 | 2.72145600  |
| H | -1.35696000 | -2.83980000 | 2.90979700  |
| H | -1.23210900 | -1.79850000 | 4.33148900  |
| O | -3.13824300 | -1.89914000 | 3.47544500  |
| C | -1.82687700 | 2.01224000  | -3.20873300 |
| H | -2.08733400 | 2.91654600  | -3.76220100 |
| H | -0.77374100 | 2.08104400  | -2.91024200 |
| H | -1.94647000 | 1.15184000  | -3.87869400 |
| O | -2.69000000 | 1.93686200  | -2.08979500 |
| H | -2.47670800 | 1.13699700  | -1.59450200 |

Energy= -1949,67262248 Hartree

**Table 7.** Optimized geometry and related energy and frequency for transition state **TS III A**.

|   |             |             |             |
|---|-------------|-------------|-------------|
| C | -4.72042900 | 0.22016100  | 0.49436700  |
| C | -3.92461600 | 0.25552500  | 1.70387600  |
| H | -4.48002800 | -0.51228100 | 2.50928800  |
| H | -2.91094800 | -0.12383600 | 1.58234800  |
| H | -3.94181700 | 1.24008100  | 2.17694000  |
| O | -5.67260700 | 0.97370500  | 0.27246100  |
| C | -4.49901900 | -0.91803100 | -0.47486700 |
| C | -3.25862400 | -1.28037200 | -1.00758800 |
| C | -5.61603000 | -1.65706400 | -0.86975000 |
| C | -3.13494700 | -2.35248200 | -1.88558000 |
| C | -5.50489600 | -2.74697000 | -1.72279400 |
| H | -6.58370200 | -1.36668200 | -0.47381200 |
| C | -4.25759300 | -3.09605300 | -2.22842200 |
| H | -2.16763500 | -2.58774400 | -2.31655700 |
| H | -6.38636800 | -3.31714600 | -1.99553600 |
| H | -4.15453100 | -3.93552800 | -2.90790600 |
| O | -2.16652600 | -0.48934500 | -0.70778100 |
| C | 0.17688300  | -0.52638500 | -0.91688600 |
| C | 1.31326900  | -0.00006100 | -1.30178900 |
| N | 2.14432800  | 0.80453200  | -0.51179100 |
| C | 1.77934900  | 1.04451100  | 0.88399200  |
| H | 2.69409000  | 1.26925300  | 1.43828300  |
| H | 1.36076900  | 0.12397400  | 1.30356900  |
| C | 0.80870200  | 2.18973500  | 1.04493300  |
| C | -0.23511800 | 2.08973900  | 1.96215200  |

|   |             |             |             |
|---|-------------|-------------|-------------|
| C | 0.97947800  | 3.37906600  | 0.33632400  |
| C | -1.09277000 | 3.16482300  | 2.17645100  |
| H | -0.38119100 | 1.16431900  | 2.51223000  |
| C | 0.12009400  | 4.45130500  | 0.54504100  |
| H | 1.79041800  | 3.46271100  | -0.38039400 |
| C | -0.91750700 | 4.34831300  | 1.46796600  |
| H | -1.90338800 | 3.07262000  | 2.89202900  |
| H | 0.26167100  | 5.37145000  | -0.01306100 |
| H | -1.58827800 | 5.18582600  | 1.63028900  |
| S | 3.77091700  | 0.89755900  | -0.93475600 |
| O | 3.80852000  | 0.77293700  | -2.38372300 |
| O | 4.28282200  | 2.09043300  | -0.28048900 |
| C | 4.57199000  | -0.51013100 | -0.22058400 |
| C | 4.48914400  | -1.74081200 | -0.86871400 |
| C | 5.23380400  | -0.37712900 | 0.99490700  |
| C | 5.08076900  | -2.84745200 | -0.28136700 |
| H | 3.98262100  | -1.82877800 | -1.82336900 |
| C | 5.82011300  | -1.49936200 | 1.56548000  |
| H | 5.30074800  | 0.59060700  | 1.47855200  |
| C | 5.75320300  | -2.74663500 | 0.94185000  |
| H | 5.02297800  | -3.80837700 | -0.78316300 |
| H | 6.34120500  | -1.40086600 | 2.51251400  |
| C | 6.40769500  | -3.94962100 | 1.55063800  |
| H | 6.64168100  | -3.78607500 | 2.60406800  |
| H | 5.76772300  | -4.83161500 | 1.46771800  |
| H | 7.34437800  | -4.17884300 | 1.03127500  |
| C | -0.94323100 | -1.12186200 | -0.61881200 |
| H | -0.99117300 | -2.13604500 | -0.22723700 |
| H | 1.67234300  | -0.13765200 | -2.31814500 |
| C | -4.52139800 | -2.64682900 | 3.18738100  |
| H | -3.84754900 | -2.63610500 | 2.30113100  |
| H | -5.29849900 | -3.40440600 | 2.95478600  |
| H | -3.91818900 | -3.08034200 | 4.01218200  |
| O | -5.03590000 | -1.40126700 | 3.47520100  |
| C | -1.72777500 | 2.22102700  | -3.06384500 |
| H | -1.86670500 | 3.20784400  | -3.50986700 |
| H | -0.65103100 | 2.02618100  | -2.98549300 |
| H | -2.17066100 | 1.47459700  | -3.73508500 |
| O | -2.35679600 | 2.23418100  | -1.79682200 |
| H | -2.24325700 | 1.36330800  | -1.39587700 |

Energy= -1949,67123367 Hartree  
Frequency= 494,39i cm<sup>-1</sup>

**Table 8.** Optimized geometry and related energy for **IV A** compound.

|   |             |             |            |
|---|-------------|-------------|------------|
| C | -4.79724800 | -0.04416600 | 0.50271000 |
| C | -3.83607600 | 0.89054000  | 0.85980000 |
| H | -3.56883700 | 0.04059500  | 2.70733500 |
| H | -2.77919600 | 0.74324100  | 0.69718200 |

|   |             |             |             |
|---|-------------|-------------|-------------|
| H | -4.17299700 | 1.81661500  | 1.32026600  |
| O | -6.04587000 | 0.12207700  | 0.67016100  |
| C | -4.39179100 | -1.38592000 | -0.10157700 |
| C | -3.12865100 | -1.78082600 | -0.57951300 |
| C | -5.41098700 | -2.34061800 | -0.19393500 |
| C | -2.92384300 | -3.04473700 | -1.13184900 |
| C | -5.21493500 | -3.61351100 | -0.71186900 |
| H | -6.38454900 | -2.03003200 | 0.16891500  |
| C | -3.95985500 | -3.96760200 | -1.18991600 |
| H | -1.95038300 | -3.29650800 | -1.53927800 |
| H | -6.03853200 | -4.31912600 | -0.75114800 |
| H | -3.78254800 | -4.94802200 | -1.62011800 |
| O | -2.08709500 | -0.88140600 | -0.55627500 |
| C | 0.23754900  | -0.75756900 | -0.84793600 |
| C | 1.30684600  | -0.20230000 | -1.35978500 |
| N | 2.07775400  | 0.79422100  | -0.73686400 |
| C | 1.75857000  | 1.17759000  | 0.63385000  |
| H | 2.66598100  | 1.57501600  | 1.09606200  |
| H | 1.47484500  | 0.27991900  | 1.19449200  |
| C | 0.66923100  | 2.22067100  | 0.72918700  |
| C | -0.00184000 | 2.37982300  | 1.94215600  |
| C | 0.35775300  | 3.06455200  | -0.33345500 |
| C | -0.96019800 | 3.37486800  | 2.09408900  |
| H | 0.22800700  | 1.72059500  | 2.77506800  |
| C | -0.60847600 | 4.05556600  | -0.18490700 |
| H | 0.87128700  | 2.94267200  | -1.28160400 |
| C | -1.26706500 | 4.21717200  | 1.02914500  |
| H | -1.47392900 | 3.48734400  | 3.04354600  |
| H | -0.84561300 | 4.70382300  | -1.02259700 |
| H | -2.01957300 | 4.99057500  | 1.14408500  |
| S | 3.66440600  | 0.98738000  | -1.25923800 |
| O | 3.64951600  | 0.68901900  | -2.68316300 |
| O | 4.08609600  | 2.29375900  | -0.78061400 |
| C | 4.63609100  | -0.24136300 | -0.43343500 |
| C | 4.65326700  | -1.54189100 | -0.93159500 |
| C | 5.33116300  | 0.09807500  | 0.72258100  |
| C | 5.37947200  | -2.50909100 | -0.25424500 |
| H | 4.11900300  | -1.79129000 | -1.84151700 |
| C | 6.05270300  | -0.88586400 | 1.38462200  |
| H | 5.31853900  | 1.11827200  | 1.08853700  |
| C | 6.08856700  | -2.19939800 | 0.91096900  |
| H | 5.39878700  | -3.52391000 | -0.63914000 |
| H | 6.59997300  | -0.62577100 | 2.28526400  |
| C | 6.89445500  | -3.24837100 | 1.61558700  |
| H | 7.01904900  | -3.01094300 | 2.67396000  |
| H | 6.42770900  | -4.23209400 | 1.52948900  |
| H | 7.89418900  | -3.32089100 | 1.17337400  |
| C | -0.82130600 | -1.38208000 | -0.40813500 |
| H | -0.75635500 | -2.31135300 | 0.15532000  |
| H | 1.65372200  | -0.46380600 | -2.35579600 |
| C | -2.33264100 | -1.28619700 | 3.41683600  |

|   |             |             |             |
|---|-------------|-------------|-------------|
| H | -2.64295700 | -2.11476400 | 2.76656100  |
| H | -2.08748800 | -1.69667600 | 4.39925100  |
| H | -1.42142400 | -0.84083000 | 2.99565300  |
| O | -3.35959700 | -0.33277200 | 3.58909700  |
| C | -4.29330800 | 1.39587300  | -2.83565400 |
| H | -5.24666000 | 0.87210000  | -2.68765900 |
| H | -4.34662000 | 1.94096700  | -3.78117300 |
| H | -3.49665900 | 0.64527900  | -2.91706100 |
| O | -4.03782100 | 2.33299900  | -1.81033200 |
| H | -3.97806900 | 1.84260400  | -0.96475900 |

Energy= -1949,69111279 Hartree

**Table 9.** Optimized geometry and related energy and frequency for transition state **TS IV A**.

|   |             |             |             |
|---|-------------|-------------|-------------|
| C | -2.80163300 | -0.29564700 | -1.58720900 |
| C | -3.49391900 | 0.19109400  | -2.65592800 |
| H | 0.70379700  | -1.54971700 | 2.42182500  |
| H | -4.42421600 | -0.26194900 | -2.97638800 |
| H | -3.14364200 | 1.07740400  | -3.17592400 |
| O | -1.72732000 | 0.27181700  | -1.11540200 |
| C | -3.34104600 | -1.52639700 | -0.92036900 |
| C | -3.48078800 | -1.62574300 | 0.46678200  |
| C | -3.77561700 | -2.61390000 | -1.68953300 |
| C | -4.05380700 | -2.74898600 | 1.05801700  |
| C | -4.33322500 | -3.74544500 | -1.10940200 |
| H | -3.65810900 | -2.56009000 | -2.76695300 |
| C | -4.47917700 | -3.81236500 | 0.27332000  |
| H | -4.16494700 | -2.77259900 | 2.13731500  |
| H | -4.65056100 | -4.57401400 | -1.73428600 |
| H | -4.92088500 | -4.68690100 | 0.73996600  |
| O | -3.08448300 | -0.58653400 | 1.28845000  |
| C | -0.66933600 | -0.79232300 | 1.30357600  |
| C | -0.30356600 | -0.59522200 | -0.02694700 |
| N | 0.68046700  | 0.33577500  | -0.33781800 |
| C | 1.09868300  | 1.34697800  | 0.62924700  |
| H | 2.18746800  | 1.30682300  | 0.74155500  |
| H | 0.67908900  | 1.00521700  | 1.58427200  |
| C | 0.67336300  | 2.76674600  | 0.34983000  |
| C | -0.55880100 | 3.07051900  | -0.22865400 |
| C | 1.51640400  | 3.80745800  | 0.74062700  |
| C | -0.93486700 | 4.39772400  | -0.41214400 |
| H | -1.20557200 | 2.25765300  | -0.55144100 |
| C | 1.13617800  | 5.13396100  | 0.56232200  |
| H | 2.48258700  | 3.58029200  | 1.18391000  |
| C | -0.09314600 | 5.43360100  | -0.01596600 |
| H | -1.89397300 | 4.62466800  | -0.86835100 |
| H | 1.80471000  | 5.93254100  | 0.86847100  |
| H | -0.39076900 | 6.46721300  | -0.16164300 |
| S | 1.68844400  | 0.06390400  | -1.65214900 |

|   |             |             |             |
|---|-------------|-------------|-------------|
| O | 1.04177400  | -0.94296700 | -2.47951100 |
| O | 2.03169200  | 1.36439000  | -2.20487200 |
| C | 3.16609900  | -0.63713800 | -0.96592700 |
| C | 4.27704700  | 0.16955700  | -0.75266000 |
| C | 3.18139200  | -1.99043100 | -0.63239600 |
| C | 5.41862100  | -0.39224600 | -0.19262000 |
| H | 4.25206700  | 1.21632500  | -1.03333100 |
| C | 4.32867800  | -2.53051800 | -0.07599800 |
| H | 2.31310800  | -2.61328800 | -0.81652000 |
| C | 5.46302500  | -1.74265300 | 0.15517000  |
| H | 6.29013800  | 0.23308100  | -0.02648300 |
| H | 4.34740000  | -3.58495500 | 0.18214500  |
| C | 6.69798600  | -2.34935200 | 0.74987900  |
| H | 6.46446600  | -2.88477600 | 1.67450200  |
| H | 7.14176200  | -3.07509100 | 0.06081000  |
| H | 7.44919600  | -1.58934500 | 0.97119200  |
| C | -1.83220800 | -0.84457800 | 1.91618500  |
| H | -1.97162000 | -1.09975000 | 2.96402100  |
| H | -0.29912800 | -1.45906900 | -0.68501200 |
| C | 2.38371200  | -1.07879200 | 3.31726600  |
| H | 2.96570300  | -0.82699300 | 2.41983700  |
| H | 2.01406100  | -0.14445900 | 3.76154800  |
| H | 3.06112700  | -1.54752500 | 4.03587300  |
| O | 1.34213600  | -1.98712000 | 3.04048400  |
| C | -4.52866100 | 2.60647300  | 1.18799000  |
| H | -5.21305200 | 3.41296500  | 1.46071500  |
| H | -4.69060000 | 2.36230300  | 0.13020200  |
| H | -3.50121000 | 2.97400200  | 1.30468500  |
| O | -4.79968100 | 1.50703400  | 2.03380100  |
| H | -4.20805200 | 0.77995700  | 1.78227200  |

Energy= -1949,65586583 Hartree  
Frequency= 216,02i cm<sup>-1</sup>

**Table 10.** Optimized geometry and related energy for **V A** compound.

|   |             |             |             |
|---|-------------|-------------|-------------|
| C | -2.16699000 | 0.25520000  | -1.84335100 |
| C | -2.58007500 | 1.00396800  | -2.87518300 |
| H | -3.30475700 | 0.61506100  | -3.57874500 |
| H | -2.22565200 | 2.02128600  | -2.99681200 |
| O | -1.37255200 | 0.81039000  | -0.89587800 |
| C | -2.60416800 | -1.14593000 | -1.65544400 |
| C | -3.07346200 | -1.58484300 | -0.41099100 |
| C | -2.59374300 | -2.05131600 | -2.72136500 |
| C | -3.51547000 | -2.89371700 | -0.24266800 |
| C | -3.03734000 | -3.35649700 | -2.55749200 |
| H | -2.21734700 | -1.71808300 | -3.68318500 |
| C | -3.49791500 | -3.77893300 | -1.31310500 |
| H | -3.88526800 | -3.19910600 | 0.73073900  |

|   |             |             |             |
|---|-------------|-------------|-------------|
| H | -3.01732500 | -4.04467600 | -3.39586400 |
| H | -3.84757400 | -4.79706000 | -1.17587800 |
| O | -3.16642700 | -0.70497600 | 0.63777800  |
| C | -0.76718400 | -0.37386200 | 1.20157100  |
| C | -0.40546700 | -0.04034800 | -0.20174900 |
| N | 0.86868200  | 0.66658600  | -0.29293400 |
| C | 1.23859100  | 1.67680000  | 0.69734300  |
| H | 2.31833100  | 1.83972400  | 0.62430500  |
| H | 1.04041700  | 1.23985200  | 1.67981700  |
| C | 0.51495800  | 2.99733000  | 0.57097700  |
| C | -0.27310500 | 3.45416100  | 1.62551600  |
| C | 0.64841500  | 3.79653900  | -0.56645900 |
| C | -0.92270400 | 4.68397700  | 1.54942600  |
| H | -0.38427000 | 2.83786900  | 2.51335200  |
| C | -0.00036900 | 5.02282300  | -0.64650600 |
| H | 1.26058000  | 3.44550200  | -1.39141600 |
| C | -0.78873400 | 5.47114400  | 0.41159900  |
| H | -1.53488300 | 5.02392200  | 2.37893900  |
| H | 0.11136100  | 5.63488700  | -1.53630800 |
| H | -1.29468100 | 6.42930100  | 0.34743300  |
| S | 1.95329900  | 0.28908900  | -1.46479500 |
| O | 1.31263100  | -0.68396000 | -2.34814200 |
| O | 2.49783800  | 1.50341600  | -2.06943400 |
| C | 3.29983200  | -0.49908800 | -0.60658100 |
| C | 4.58937100  | -0.36088100 | -1.10939400 |
| C | 3.04378700  | -1.28758600 | 0.50891800  |
| C | 5.63122200  | -1.03129500 | -0.48408800 |
| H | 4.77412700  | 0.26704300  | -1.97364500 |
| C | 4.09982900  | -1.94739100 | 1.12287000  |
| H | 2.03713100  | -1.36313700 | 0.91014700  |
| C | 5.40570300  | -1.83184400 | 0.63932900  |
| H | 6.63920000  | -0.92769800 | -0.87424000 |
| H | 3.90533700  | -2.55927900 | 1.99862600  |
| C | 6.54417700  | -2.52275400 | 1.32865900  |
| H | 7.00330400  | -1.85819300 | 2.06885700  |
| H | 6.20623900  | -3.41750800 | 1.85571600  |
| H | 7.32372100  | -2.80868200 | 0.61888500  |
| C | -2.01411000 | -0.67968300 | 1.51972400  |
| H | -2.35491100 | -0.95296200 | 2.51633700  |
| H | -0.29032300 | -0.95538200 | -0.78897900 |
| C | 0.81634900  | -2.15742300 | 3.70832700  |
| H | -0.15794600 | -2.49655500 | 4.09366400  |
| H | 1.04997600  | -2.76913400 | 2.82306900  |
| H | 1.56963500  | -2.38117800 | 4.47124500  |
| O | 0.83715600  | -0.78319800 | 3.42920000  |
| H | 0.26882100  | -0.61618400 | 2.58746000  |
| C | -6.03028400 | -0.84115800 | 2.62749300  |
| H | -6.99834200 | -0.53307300 | 3.02886300  |
| H | -5.30825800 | -0.86003700 | 3.45412100  |
| H | -6.13287600 | -1.86074800 | 2.23378300  |
| O | -5.66521600 | 0.08257500  | 1.62330600  |



H -4.80146200 -0.18563700 1.26807200

Energy= -1949,67068685 Hartree

**Table 11.** Optimized geometry and related energy and frequency for transition state **TS V A**.

|   |             |             |             |
|---|-------------|-------------|-------------|
| C | -2.12299500 | -1.11045700 | -1.32301800 |
| C | -2.98763700 | -0.84894100 | -2.31115000 |
| H | -3.45749000 | -1.65787000 | -2.85543100 |
| H | -3.25688700 | 0.17253000  | -2.55430300 |
| O | -1.65821300 | -0.08961800 | -0.55773800 |
| C | -1.70143500 | -2.48373100 | -0.97099200 |
| C | -1.70321100 | -2.90933200 | 0.36246700  |
| C | -1.31360800 | -3.39445000 | -1.95896200 |
| C | -1.32309300 | -4.20420600 | 0.69691200  |
| C | -0.93787200 | -4.68971200 | -1.63058400 |
| H | -1.29639100 | -3.06469700 | -2.99264800 |
| C | -0.93912500 | -5.09426700 | -0.29825800 |
| H | -1.35022900 | -4.50477000 | 1.73900600  |
| H | -0.63679300 | -5.38016900 | -2.41120400 |
| H | -0.64692400 | -6.10504500 | -0.03297400 |
| O | -2.15786400 | -2.07113600 | 1.35508700  |
| C | -0.31236100 | -0.43734800 | 1.47371500  |
| C | -0.31906100 | -0.18654900 | 0.00209700  |
| N | 0.35990000  | 1.04838700  | -0.36894700 |
| C | 0.21830300  | 2.25125700  | 0.45510600  |
| H | 1.05256200  | 2.91607800  | 0.22116000  |
| H | 0.32166600  | 1.95336500  | 1.50081600  |
| C | -1.08138800 | 2.99059200  | 0.23996600  |
| C | -1.96228100 | 3.17492400  | 1.30336900  |
| C | -1.40648400 | 3.52883000  | -1.00683700 |
| C | -3.15163300 | 3.87902900  | 1.12853200  |
| H | -1.71835200 | 2.75867100  | 2.27694000  |
| C | -2.59264600 | 4.22982600  | -1.18550600 |
| H | -0.72181900 | 3.39122400  | -1.83855500 |
| C | -3.47047000 | 4.40654800  | -0.11735500 |
| H | -3.82909400 | 4.01168800  | 1.96633300  |
| H | -2.83382600 | 4.64392300  | -2.15973500 |
| H | -4.39711600 | 4.95401200  | -0.25783200 |
| S | 1.48900400  | 1.00723400  | -1.56970900 |
| O | 1.09617900  | -0.05009300 | -2.49577400 |
| O | 1.65117600  | 2.37482700  | -2.05248400 |
| C | 3.03954600  | 0.51846500  | -0.84929900 |
| C | 3.87966700  | 1.48575800  | -0.30576200 |
| C | 3.38618000  | -0.82839900 | -0.82012400 |
| C | 5.07311000  | 1.09004800  | 0.28122000  |
| H | 3.61305100  | 2.53522000  | -0.35896000 |
| C | 4.58533700  | -1.20425700 | -0.23033800 |
| H | 2.73573900  | -1.56960100 | -1.27045000 |
| C | 5.44256100  | -0.25685300 | 0.33463100  |

|   |             |             |             |
|---|-------------|-------------|-------------|
| H | 5.73455400  | 1.84360200  | 0.69781700  |
| H | 4.86305000  | -2.25381300 | -0.21588100 |
| C | 6.72030800  | -0.67576400 | 0.99775300  |
| H | 6.55459100  | -0.85349500 | 2.06619600  |
| H | 7.10739800  | -1.60189600 | 0.56747800  |
| H | 7.48655700  | 0.09765600  | 0.91020800  |
| C | -1.15388000 | -1.30221500 | 2.02122600  |
| H | -1.18722900 | -1.52316700 | 3.08554300  |
| H | 0.19947200  | -0.99906000 | -0.51619800 |
| C | 2.42379500  | -0.32640400 | 3.32299600  |
| H | 2.48674900  | -0.76681800 | 4.33426400  |
| H | 2.33099500  | -1.17362500 | 2.61706500  |
| H | 3.40321600  | 0.14154200  | 3.12174900  |
| O | 1.36806500  | 0.56775100  | 3.19242200  |
| H | 0.61596600  | 0.13344500  | 2.39068900  |
| C | -5.14066200 | -0.11431700 | 1.15679700  |
| H | -6.21098300 | 0.07907300  | 1.25777800  |
| H | -4.86452200 | 0.01134400  | 0.10252000  |
| H | -4.59977500 | 0.63451000  | 1.74962600  |
| O | -4.89717700 | -1.42991600 | 1.61361300  |
| H | -3.95263100 | -1.62127900 | 1.50434800  |

Energy= -1949,67050486 Hartree  
Frequency= 900,80i cm<sup>-1</sup>

**Table 12.** Optimized geometry and related energy for **I B** compound.

|   |             |             |             |
|---|-------------|-------------|-------------|
| C | 4.40008500  | -0.37927200 | 1.10827500  |
| C | 3.68686900  | 0.90534400  | 0.91655600  |
| H | 2.70956900  | 0.78150400  | 0.45253000  |
| H | 3.60303300  | 1.43246300  | 1.86944400  |
| O | 5.16656700  | -0.56258100 | 2.04457700  |
| C | 4.31415100  | -1.43937900 | 0.04345500  |
| C | 3.12726200  | -1.85753300 | -0.58236600 |
| C | 5.51378900  | -2.03832900 | -0.34388100 |
| C | 3.16561300  | -2.82336100 | -1.58680600 |
| C | 5.56222100  | -2.98969400 | -1.35347200 |
| H | 6.42277400  | -1.72114400 | 0.15634100  |
| C | 4.38162000  | -3.37538500 | -1.97490700 |
| H | 2.25508400  | -3.16501100 | -2.06281700 |
| H | 6.51009300  | -3.42391300 | -1.65140700 |
| H | 4.39470300  | -4.12128000 | -2.76285400 |
| O | 1.95964700  | -1.32072400 | -0.12349600 |
| C | -0.26226500 | -0.62994900 | -0.41060100 |
| C | -1.11426200 | 0.10044800  | 0.03167800  |
| N | -2.02972300 | 0.95436000  | 0.50206700  |
| C | -2.26511800 | 2.21910000  | -0.23339000 |
| H | -3.02784700 | 2.76098600  | 0.32812200  |
| H | -2.65284800 | 1.99789600  | -1.23238400 |
| C | -0.99942400 | 3.02778600  | -0.32128300 |

|   |             |             |             |
|---|-------------|-------------|-------------|
| C | -0.41443400 | 3.28671300  | -1.55824800 |
| C | -0.40002600 | 3.52957800  | 0.83553400  |
| C | 0.75339000  | 4.04066000  | -1.64280400 |
| H | -0.87351300 | 2.89589000  | -2.46173000 |
| C | 0.76702700  | 4.27777900  | 0.75344900  |
| H | -0.84879600 | 3.32737100  | 1.80388300  |
| C | 1.34684900  | 4.53496000  | -0.48735200 |
| H | 1.20139100  | 4.23496900  | -2.61189400 |
| H | 1.22582500  | 4.66350600  | 1.65812800  |
| H | 2.26001300  | 5.11784500  | -0.55055500 |
| S | -3.28025100 | 0.29922100  | 1.46219400  |
| O | -2.64314800 | -0.69737600 | 2.30231300  |
| O | -3.95357600 | 1.44951100  | 2.04016000  |
| C | -4.38419300 | -0.51333700 | 0.34835500  |
| C | -4.15064700 | -1.84354100 | 0.01085700  |
| C | -5.44401500 | 0.20101100  | -0.20276600 |
| C | -4.99955100 | -2.46031000 | -0.89621600 |
| H | -3.32654000 | -2.38639200 | 0.45891400  |
| C | -6.28079500 | -0.43698700 | -1.10621500 |
| H | -5.61716800 | 1.23295900  | 0.08041300  |
| C | -6.07393000 | -1.77170300 | -1.46681900 |
| H | -4.82592400 | -3.49791800 | -1.16353800 |
| H | -7.11208400 | 0.11177900  | -1.53747200 |
| C | -7.00330800 | -2.45880900 | -2.42064100 |
| H | -7.83673000 | -2.91586000 | -1.87580400 |
| H | -7.42859900 | -1.75434300 | -3.13852200 |
| H | -6.49418700 | -3.25442300 | -2.96846300 |
| C | 0.77658400  | -1.49592400 | -0.91709500 |
| H | 1.00012000  | -1.24789000 | -1.96098800 |
| H | 0.44806700  | -2.54109200 | -0.87537200 |
| C | 4.71288000  | 2.16232400  | -2.17957300 |
| H | 5.47804700  | 1.75635400  | -2.88432200 |
| H | 3.96150500  | 1.33752800  | -2.08129300 |
| H | 4.18245000  | 2.95160700  | -2.76549200 |
| O | 5.21776300  | 2.58951600  | -0.98426900 |
| H | 4.31638900  | 1.53724600  | 0.21766500  |
| C | 1.71166900  | -2.83244200 | 3.10396300  |
| H | 1.50639500  | -2.95863300 | 4.16877900  |
| H | 2.76710200  | -3.07385000 | 2.92608300  |
| H | 1.09048200  | -3.54501200 | 2.54732800  |
| O | 1.41075800  | -1.49127200 | 2.76806800  |
| H | 1.57095800  | -1.37627300 | 1.82274600  |

Energy= -1949,66305092 Hartree

**Table 13.** Optimized geometry and related energy and frequency for transition state **TS I B**.

|   |            |             |            |
|---|------------|-------------|------------|
| C | 4.46646600 | -0.34663800 | 1.08654600 |
| C | 3.80678900 | 0.90430200  | 0.78017100 |
| H | 2.85258100 | 0.79781500  | 0.26777800 |

|   |             |             |             |
|---|-------------|-------------|-------------|
| H | 3.74017200  | 1.55655100  | 1.65426300  |
| O | 5.26603000  | -0.48635200 | 2.01954000  |
| C | 4.32784100  | -1.50428400 | 0.12259300  |
| C | 3.11728300  | -1.95829400 | -0.42849500 |
| C | 5.50070200  | -2.17006100 | -0.23485200 |
| C | 3.10665100  | -3.02651600 | -1.32523400 |
| C | 5.50271200  | -3.22410800 | -1.13938300 |
| H | 6.42903800  | -1.82671700 | 0.20974000  |
| C | 4.29818400  | -3.64739300 | -1.68495700 |
| H | 2.17597600  | -3.39352100 | -1.73957300 |
| H | 6.43343400  | -3.70884000 | -1.41348400 |
| H | 4.27255600  | -4.47301000 | -2.38871700 |
| O | 1.97047800  | -1.34345700 | -0.01147900 |
| C | -0.24996200 | -0.65633800 | -0.32087500 |
| C | -1.09521800 | 0.11660600  | 0.05726500  |
| N | -2.00422800 | 1.01524100  | 0.45285600  |
| C | -2.19873000 | 2.23293500  | -0.36934700 |
| H | -2.96921900 | 2.82019700  | 0.13255900  |
| H | -2.55971200 | 1.95319100  | -1.36369300 |
| C | -0.91830500 | 3.01647900  | -0.46982500 |
| C | -0.28538600 | 3.17584900  | -1.70002700 |
| C | -0.35283600 | 3.59413400  | 0.66852600  |
| C | 0.89646700  | 3.90613700  | -1.79634800 |
| H | -0.71782900 | 2.72514800  | -2.58866800 |
| C | 0.82800000  | 4.31900900  | 0.57508400  |
| H | -0.83937000 | 3.46983400  | 1.63175700  |
| C | 1.45570400  | 4.47657400  | -0.65903100 |
| H | 1.38190200  | 4.02278800  | -2.75987300 |
| H | 1.26000100  | 4.76447200  | 1.46539900  |
| H | 2.37932100  | 5.04175500  | -0.73107800 |
| S | -3.29253700 | 0.43902700  | 1.41374400  |
| O | -2.69394100 | -0.49172900 | 2.35205800  |
| O | -3.98081900 | 1.63220900  | 1.87588500  |
| C | -4.35710500 | -0.45561300 | 0.32459600  |
| C | -4.12176400 | -1.81027000 | 0.10685000  |
| C | -5.38528500 | 0.21761300  | -0.32864400 |
| C | -4.93683000 | -2.49409200 | -0.78295100 |
| H | -3.32238600 | -2.31914500 | 0.63278900  |
| C | -6.18855300 | -0.48710300 | -1.21284500 |
| H | -5.56046500 | 1.27039500  | -0.13857200 |
| C | -5.97903700 | -1.84803300 | -1.45417500 |
| H | -4.76152400 | -3.55101600 | -0.95741200 |
| H | -6.99516500 | 0.02966300  | -1.72326800 |
| C | -6.87249200 | -2.60605800 | -2.38845500 |
| H | -7.72294100 | -3.02818600 | -1.84176300 |
| H | -7.27432400 | -1.95698100 | -3.16920900 |
| H | -6.34197900 | -3.43585800 | -2.86011200 |
| C | 0.77159300  | -1.57952700 | -0.75921000 |
| H | 0.97545000  | -1.43976100 | -1.82728300 |
| H | 0.42792000  | -2.61042600 | -0.61006200 |
| C | 4.78965000  | 1.96287800  | -2.20222100 |

|   |             |             |             |
|---|-------------|-------------|-------------|
| H | 5.52388100  | 1.49686300  | -2.89120400 |
| H | 3.93363500  | 1.25324100  | -2.15763300 |
| H | 4.40422100  | 2.85727400  | -2.73401400 |
| O | 5.30834100  | 2.24457800  | -0.95607000 |
| H | 4.55326600  | 1.50840500  | -0.02862500 |
| C | 0.63587700  | -2.23854500 | 3.09314000  |
| H | 0.43879100  | -2.30919300 | 4.16489600  |
| H | -0.32415200 | -2.13155300 | 2.57368300  |
| H | 1.11258300  | -3.17253300 | 2.76997600  |
| O | 1.47474100  | -1.11720200 | 2.88766200  |
| H | 1.67138400  | -1.06420300 | 1.94337500  |

Energy= -1949,66148217 Hartree

Frequency= 607,74i cm<sup>-1</sup>

**Table 14.** Optimized geometry and related energy for **II B** compound.

|   |             |             |             |
|---|-------------|-------------|-------------|
| C | 4.45467500  | -0.49319700 | 1.14635500  |
| C | 3.67433100  | 0.64906800  | 1.04392200  |
| H | 2.86603900  | 0.73419400  | 0.33036800  |
| H | 3.86523800  | 1.47486900  | 1.72596300  |
| O | 5.38982400  | -0.65794400 | 1.99195500  |
| C | 4.27244700  | -1.62251300 | 0.14215800  |
| C | 3.07589800  | -1.99144600 | -0.50921000 |
| C | 5.41221200  | -2.37435200 | -0.14752500 |
| C | 3.05967400  | -3.06020900 | -1.40937000 |
| C | 5.41105100  | -3.42737300 | -1.05508000 |
| H | 6.31983500  | -2.09889400 | 0.37889100  |
| C | 4.22429800  | -3.76918200 | -1.68714300 |
| H | 2.14031400  | -3.35604300 | -1.89901900 |
| H | 6.32485700  | -3.97552600 | -1.26005600 |
| H | 4.18899500  | -4.59172700 | -2.39457900 |
| O | 1.95310300  | -1.28483900 | -0.20635000 |
| C | -0.29638500 | -0.70474700 | -0.45589700 |
| C | -1.14433200 | 0.06798300  | -0.08408500 |
| N | -2.06058000 | 0.96553700  | 0.30334100  |
| C | -2.37546700 | 2.09030800  | -0.60569800 |
| H | -3.13201300 | 2.69166500  | -0.09859400 |
| H | -2.79858100 | 1.70634400  | -1.53902500 |
| C | -1.14595600 | 2.91355900  | -0.88091800 |
| C | -0.67305600 | 3.05591800  | -2.18285900 |
| C | -0.47205100 | 3.54995200  | 0.16313400  |
| C | 0.45580500  | 3.82886300  | -2.44340400 |
| H | -1.18932300 | 2.55862700  | -2.99895000 |
| C | 0.65713800  | 4.31635300  | -0.09405200 |
| H | -0.83214500 | 3.43790600  | 1.18178500  |
| C | 1.12347100  | 4.45834100  | -1.39954800 |
| H | 0.81499700  | 3.93282000  | -3.46214700 |
| H | 1.17439500  | 4.80686100  | 0.72424600  |
| H | 2.00575900  | 5.05766300  | -1.59971100 |

|   |             |             |             |
|---|-------------|-------------|-------------|
| S | -3.23946700 | 0.43544800  | 1.41547000  |
| O | -2.52912900 | -0.39247500 | 2.37222900  |
| O | -3.93217800 | 1.64161200  | 1.83638100  |
| C | -4.35851000 | -0.58096300 | 0.50113100  |
| C | -4.09057500 | -1.94124100 | 0.37314100  |
| C | -5.46893600 | 0.00042900  | -0.10332300 |
| C | -4.95433800 | -2.72352000 | -0.37861200 |
| H | -3.23125400 | -2.37929200 | 0.86736100  |
| C | -6.32013700 | -0.80206300 | -0.84900500 |
| H | -5.67284300 | 1.05754200  | 0.02340200  |
| C | -6.07521600 | -2.16932600 | -1.00431200 |
| H | -4.75779700 | -3.78676200 | -0.47474800 |
| H | -7.19543300 | -0.35843500 | -1.31290700 |
| C | -6.98470000 | -3.02120600 | -1.83685400 |
| H | -7.99107900 | -2.60064900 | -1.88487300 |
| H | -6.60633700 | -3.09032800 | -2.86270200 |
| H | -7.04767800 | -4.03803000 | -1.44321700 |
| C | 0.74374700  | -1.61887400 | -0.87692800 |
| H | 0.87993000  | -1.54929700 | -1.96382300 |
| H | 0.44587600  | -2.64964900 | -0.64343000 |
| C | 4.75627900  | 1.55259800  | -2.32397700 |
| H | 5.33630600  | 1.99060000  | -3.13985300 |
| H | 4.67763200  | 0.47172300  | -2.50075600 |
| H | 3.74560300  | 1.98152900  | -2.35551400 |
| O | 5.42049200  | 1.84425900  | -1.11300700 |
| H | 4.90651200  | 1.42981400  | -0.38711500 |
| C | 2.10497700  | 0.34468700  | 4.28856100  |
| H | 1.38437700  | 0.13314900  | 5.08223200  |
| H | 2.16449000  | 1.43397800  | 4.16439000  |
| H | 3.08873400  | -0.01874800 | 4.61388400  |
| O | 1.65928600  | -0.30161500 | 3.11583600  |
| H | 2.29087300  | -0.09088300 | 2.39762000  |

Energy= -1949,68044590 Hartree

**Table 15.** Optimized geometry and related energy and frequency for transition state **TS II B**.

|   |             |             |             |
|---|-------------|-------------|-------------|
| C | -2.71777900 | 0.30636100  | -1.51217500 |
| C | -3.89074400 | 0.89529500  | -1.87842300 |
| H | -4.75215300 | 0.29558300  | -2.14994300 |
| H | -3.97554500 | 1.97755800  | -1.92453900 |
| O | -1.62400100 | 0.94559100  | -1.22335400 |
| C | -2.68074200 | -1.19752900 | -1.49341100 |
| C | -2.61667600 | -1.89720700 | -0.28953900 |
| C | -2.72180100 | -1.93638100 | -2.67773900 |
| C | -2.59684200 | -3.28858600 | -0.25900400 |
| C | -2.68653900 | -3.32736300 | -2.66307700 |
| H | -2.77654300 | -1.40422100 | -3.62263900 |
| C | -2.62532200 | -4.00584600 | -1.44987600 |
| H | -2.57561700 | -3.80134300 | 0.69785700  |

|   |             |             |             |
|---|-------------|-------------|-------------|
| H | -2.71305400 | -3.88016300 | -3.59673300 |
| H | -2.61061100 | -5.09078800 | -1.42722300 |
| O | -2.63325900 | -1.18756400 | 0.89231600  |
| C | -0.30804900 | -0.38422900 | 0.93052400  |
| C | -0.09106200 | 0.38111600  | -0.04236800 |
| N | 0.81539000  | 1.21003700  | -0.62448100 |
| C | 1.31907800  | 2.34535900  | 0.18220700  |
| H | 2.14770300  | 2.78471900  | -0.37446800 |
| H | 1.69731400  | 1.96145000  | 1.13535300  |
| C | 0.25922500  | 3.38606700  | 0.41624200  |
| C | -0.42781100 | 3.43436600  | 1.62747200  |
| C | -0.03966400 | 4.32570300  | -0.57148500 |
| C | -1.40501500 | 4.40123700  | 1.84854500  |
| H | -0.19475100 | 2.71008700  | 2.40267800  |
| C | -1.01331200 | 5.29254100  | -0.35389300 |
| H | 0.49472900  | 4.29734500  | -1.51692800 |
| C | -1.70006600 | 5.33101100  | 0.85768400  |
| H | -1.93329900 | 4.42888100  | 2.79624800  |
| H | -1.23494600 | 6.02055000  | -1.12779900 |
| H | -2.45928000 | 6.08746100  | 1.02895800  |
| S | 1.86073200  | 0.53870300  | -1.77135800 |
| O | 1.07298800  | -0.36341300 | -2.59291300 |
| O | 2.55310700  | 1.66718700  | -2.38087000 |
| C | 3.05182700  | -0.42770300 | -0.88542300 |
| C | 2.78593800  | -1.77089100 | -0.63364200 |
| C | 4.22368600  | 0.17222500  | -0.43548500 |
| C | 3.71300400  | -2.51533200 | 0.08085500  |
| H | 1.87625200  | -2.22531700 | -1.00749300 |
| C | 5.13708800  | -0.59023900 | 0.27916000  |
| H | 4.42705400  | 1.21353200  | -0.65839500 |
| C | 4.89587000  | -1.93910600 | 0.55313300  |
| H | 3.51655900  | -3.56619300 | 0.27051800  |
| H | 6.05867200  | -0.13030200 | 0.62222900  |
| C | 5.87371600  | -2.74845900 | 1.35071600  |
| H | 5.91326100  | -3.78234000 | 1.00001900  |
| H | 6.87820900  | -2.32350400 | 1.30071500  |
| H | 5.57665900  | -2.77284700 | 2.40512500  |
| C | -1.35978400 | -1.15263100 | 1.58172900  |
| H | -1.58397500 | -0.72124800 | 2.56186800  |
| H | -1.03185000 | -2.18547800 | 1.75054300  |
| C | 2.05142400  | -1.30670200 | 3.58259800  |
| H | 1.11530500  | -1.63346900 | 4.05479100  |
| H | 2.41077100  | -2.11365100 | 2.93055900  |
| H | 2.79177300  | -1.15241400 | 4.37126500  |
| O | 1.89937400  | -0.08837000 | 2.88565700  |
| H | 1.22786300  | -0.21948300 | 2.17977900  |
| C | -5.12059100 | -2.24181200 | 3.07153500  |
| H | -4.27379600 | -2.41095600 | 3.74921700  |
| H | -6.03317700 | -2.20362200 | 3.67047800  |
| H | -5.19477500 | -3.09829000 | 2.38909700  |
| O | -5.00876300 | -1.01697300 | 2.37637800  |

H -4.19807300 -1.05030100 1.84309300

Energy= -1949,65014713 Hartree

Frequency= 230,62i cm<sup>-1</sup>

**Table 16.** Optimized geometry and related energy for **III B** compound.

|   |             |             |             |
|---|-------------|-------------|-------------|
| C | -1.31646300 | -1.42560000 | -1.99681800 |
| C | -1.96935500 | -1.60337400 | -3.15276000 |
| H | -1.82247200 | -2.50681300 | -3.72989400 |
| H | -2.67056000 | -0.85914000 | -3.51353000 |
| O | -1.62627800 | -0.34269500 | -1.23708500 |
| C | -0.35441500 | -2.42562900 | -1.48748200 |
| C | -0.50089900 | -2.95644600 | -0.20178500 |
| C | 0.65637700  | -2.93261000 | -2.30769900 |
| C | 0.34165500  | -3.96741300 | 0.25073600  |
| C | 1.50282800  | -3.93935600 | -1.85950000 |
| H | 0.77903400  | -2.51483400 | -3.30112100 |
| C | 1.34392800  | -4.45904000 | -0.57779000 |
| H | 0.19414000  | -4.36856300 | 1.24853700  |
| H | 2.28649200  | -4.31628300 | -2.50840400 |
| H | 1.99752700  | -5.24943600 | -0.22291000 |
| O | -1.50853000 | -2.49421800 | 0.59997100  |
| C | -0.50529200 | -0.19167700 | 0.95683800  |
| C | -0.74874600 | 0.22346600  | -0.27792200 |
| N | -0.33958800 | 1.52337800  | -0.76197400 |
| C | -0.55978800 | 2.66022800  | 0.13886400  |
| H | -0.05586400 | 3.52601500  | -0.29882800 |
| H | -0.11877000 | 2.46116200  | 1.11961000  |
| C | -2.02835800 | 2.96788700  | 0.28479600  |
| C | -2.58862500 | 3.13038100  | 1.55024300  |
| C | -2.83922800 | 3.13900000  | -0.83860900 |
| C | -3.93283700 | 3.46538900  | 1.69492600  |
| H | -1.96738600 | 2.99018200  | 2.43041700  |
| C | -4.18168800 | 3.46905600  | -0.69808500 |
| H | -2.41117100 | 3.00387600  | -1.82730800 |
| C | -4.73314500 | 3.63494400  | 0.57075700  |
| H | -4.35484000 | 3.58716300  | 2.68762500  |
| H | -4.80070800 | 3.59957600  | -1.58033000 |
| H | -5.78182500 | 3.89233500  | 0.68040400  |
| S | 1.03420000  | 1.57875800  | -1.70222400 |
| O | 0.93721200  | 0.47400100  | -2.64857000 |
| O | 1.14922100  | 2.94538600  | -2.21099800 |
| C | 2.45288600  | 1.27230400  | -0.67868500 |
| C | 2.87012300  | -0.03886700 | -0.46714800 |
| C | 3.11484600  | 2.34037300  | -0.08256900 |
| C | 3.96707800  | -0.27239300 | 0.34995800  |
| H | 2.35050900  | -0.85826300 | -0.95105600 |
| C | 4.20831800  | 2.08594700  | 0.73490000  |
| H | 2.79000400  | 3.35738300  | -0.27150400 |



|   |             |             |            |
|---|-------------|-------------|------------|
| C | 4.64816400  | 0.78057900  | 0.96780000 |
| H | 4.30313100  | -1.29284000 | 0.50897500 |
| H | 4.73486200  | 2.91803800  | 1.19250800 |
| C | 5.81169000  | 0.51113300  | 1.87478400 |
| H | 6.39632000  | -0.34443400 | 1.52847500 |
| H | 6.47119300  | 1.37856400  | 1.94615500 |
| H | 5.46123700  | 0.27836800  | 2.88660300 |
| C | -1.04589100 | -1.43705300 | 1.52457700 |
| H | -1.92603800 | -1.22241200 | 2.14198900 |
| C | 1.57839700  | 0.16615500  | 3.72900900 |
| H | 0.95490600  | -0.59674600 | 4.22070100 |
| H | 2.28577300  | -0.35521900 | 3.06699800 |
| H | 2.16262600  | 0.66594000  | 4.50867600 |
| O | 0.81493100  | 1.12543600  | 3.04437200 |
| H | 0.35250900  | 0.66500900  | 2.25334200 |
| H | -0.30711400 | -1.92338600 | 2.17473500 |
| C | -3.23269400 | -4.83112300 | 2.53042900 |
| H | -4.07347400 | -5.44953700 | 2.85264200 |
| H | -2.37669000 | -5.49155300 | 2.34010700 |
| H | -2.97146600 | -4.15404700 | 3.35401200 |
| O | -3.63119100 | -4.12941000 | 1.37134300 |
| H | -2.88808200 | -3.56943900 | 1.08892000 |

Energy= -1949,67716735 Hartree

**Table 17.** Optimized geometry and related energy and frequency for transition state **TS III B**.

|   |             |             |             |
|---|-------------|-------------|-------------|
| C | 1.13334600  | 2.04970400  | -1.35850900 |
| C | 1.80842100  | 2.52472200  | -2.41123500 |
| H | 1.59009200  | 3.51082900  | -2.79948300 |
| H | 2.59595100  | 1.94099800  | -2.87416000 |
| O | 1.53006400  | 0.86404700  | -0.81590000 |
| C | 0.05080100  | 2.81591200  | -0.70839900 |
| C | 0.08196100  | 3.05309200  | 0.66880700  |
| C | -0.97670100 | 3.39039100  | -1.46061400 |
| C | -0.88637000 | 3.84178500  | 1.28010900  |
| C | -1.94918500 | 4.17704600  | -0.85581700 |
| H | -1.01076400 | 3.19824900  | -2.52752100 |
| C | -1.90410500 | 4.40291200  | 0.51725300  |
| H | -0.82415000 | 4.01895700  | 2.34904200  |
| H | -2.74347300 | 4.61054500  | -1.45441500 |
| H | -2.65784100 | 5.02042000  | 0.99497900  |
| O | 1.10968300  | 2.53370200  | 1.41294700  |
| C | 0.34874500  | 0.14142200  | 1.20491500  |
| C | 0.68048400  | 0.02193400  | -0.07524800 |
| N | 0.42794500  | -1.17516800 | -0.83373800 |
| C | 0.73254300  | -2.45844300 | -0.17822400 |
| H | 0.38502300  | -3.24909400 | -0.84733800 |
| H | 0.19688700  | -2.53881000 | 0.77193100  |
| C | 2.21567900  | -2.60858400 | 0.04116100  |

|   |             |             |             |
|---|-------------|-------------|-------------|
| C | 2.72554300  | -2.75743800 | 1.32920200  |
| C | 3.09774300  | -2.62523300 | -1.04116900 |
| C | 4.09294400  | -2.92593400 | 1.53586100  |
| H | 2.04349800  | -2.73543300 | 2.17422100  |
| C | 4.46243900  | -2.78983400 | -0.83876100 |
| H | 2.70789400  | -2.50441400 | -2.04787400 |
| C | 4.96426300  | -2.94149900 | 0.45258200  |
| H | 4.47663700  | -3.04036400 | 2.54488900  |
| H | 5.13741900  | -2.80370200 | -1.68888700 |
| H | 6.03019600  | -3.07113100 | 0.61105600  |
| S | -0.85822200 | -1.15512100 | -1.89157600 |
| O | -0.81955300 | 0.13631500  | -2.56631700 |
| O | -0.77347700 | -2.38093500 | -2.68347400 |
| C | -2.37621900 | -1.22206800 | -0.97157600 |
| C | -2.98390200 | -0.03591300 | -0.57194000 |
| C | -2.93567400 | -2.45669400 | -0.65646100 |
| C | -4.16864200 | -0.09612900 | 0.14910100  |
| H | -2.54194600 | 0.91768900  | -0.83867400 |
| C | -4.11895600 | -2.49585400 | 0.06770900  |
| H | -2.46238500 | -3.37244800 | -0.99251000 |
| C | -4.75093700 | -1.32095400 | 0.48468600  |
| H | -4.65211500 | 0.82727700  | 0.45381600  |
| H | -4.56473800 | -3.45705400 | 0.30541100  |
| C | -6.01275200 | -1.37518500 | 1.29290900  |
| H | -6.62357800 | -0.48297100 | 1.13895800  |
| H | -6.60955900 | -2.25496100 | 1.04195100  |
| H | -5.77797200 | -1.43250400 | 2.36180300  |
| C | 0.75733200  | 1.27730600  | 2.06330100  |
| H | 1.64721600  | 1.00918600  | 2.64469100  |
| C | -1.84341800 | -1.12647900 | 3.33481900  |
| H | -1.70548200 | -1.00307600 | 4.42401900  |
| H | -2.07451700 | -0.12318600 | 2.93020100  |
| H | -2.75680200 | -1.73096300 | 3.19907200  |
| O | -0.73489500 | -1.69175500 | 2.71367500  |
| H | -0.27184700 | -0.88341600 | 1.98228100  |
| H | -0.03578400 | 1.51044100  | 2.78491100  |
| C | 4.57556600  | 2.23382900  | 0.56800800  |
| H | 5.61271000  | 2.57300400  | 0.51621200  |
| H | 4.54824000  | 1.30435200  | 1.15173900  |
| H | 4.22995800  | 2.01444100  | -0.44929000 |
| O | 3.81739900  | 3.26216100  | 1.17270000  |
| H | 2.88772400  | 2.98408000  | 1.19648800  |

Energy= -1949,67587507 Hartree  
Frequency= 945,77i cm<sup>-1</sup>

**Table 18.** Optimized geometry and related energy for **IV B** compound.

|   |             |            |             |
|---|-------------|------------|-------------|
| C | -0.27091400 | 2.92361600 | -0.32540100 |
| C | -0.34766500 | 3.96734300 | -1.15202800 |

|   |             |             |             |
|---|-------------|-------------|-------------|
| H | -1.18411400 | 4.65022400  | -1.08666900 |
| H | 0.43055200  | 4.15625500  | -1.88233400 |
| O | 0.87192100  | 2.15788100  | -0.37329900 |
| C | -1.30872700 | 2.61058500  | 0.67588600  |
| C | -0.96516800 | 2.44255700  | 2.02047100  |
| C | -2.65786200 | 2.55046000  | 0.31693600  |
| C | -1.94038800 | 2.21439600  | 2.98382500  |
| C | -3.63732600 | 2.32296500  | 1.27600700  |
| H | -2.92922500 | 2.66625800  | -0.72718500 |
| C | -3.27810800 | 2.15245400  | 2.61007600  |
| H | -1.64273300 | 2.10304600  | 4.02152600  |
| H | -4.68029300 | 2.27405800  | 0.98143500  |
| H | -4.03976500 | 1.97751400  | 3.36292700  |
| O | 0.35065300  | 2.57165100  | 2.38388500  |
| C | 1.02928500  | 0.45314000  | 1.31521800  |
| C | 0.93788000  | 0.84999100  | 0.04693500  |
| N | 1.15389200  | -0.04927000 | -1.04082400 |
| C | 2.18011300  | -1.10286000 | -0.85347000 |
| H | 2.17663400  | -1.69820200 | -1.76963500 |
| H | 1.93155800  | -1.74669800 | 0.00090300  |
| C | 3.54281500  | -0.49718600 | -0.64937300 |
| C | 4.23609600  | -0.76464300 | 0.53059700  |
| C | 4.13536600  | 0.30166400  | -1.62867900 |
| C | 5.51362500  | -0.24353200 | 0.72440100  |
| H | 3.74502800  | -1.37348900 | 1.28941700  |
| C | 5.40794300  | 0.82516900  | -1.43203500 |
| H | 3.59557300  | 0.51427500  | -2.54726800 |
| C | 6.10090100  | 0.55183000  | -0.25420400 |
| H | 6.04944700  | -0.45451600 | 1.64503900  |
| H | 5.86320400  | 1.44375000  | -2.19927100 |
| H | 7.09547800  | 0.95947500  | -0.10211600 |
| S | -0.19971300 | -0.53067700 | -1.90359000 |
| O | -1.04598000 | 0.65765300  | -1.99856300 |
| O | 0.27700200  | -1.17121000 | -3.12137800 |
| C | -1.06123100 | -1.74228000 | -0.94073900 |
| C | -1.95024600 | -1.32420100 | 0.04620500  |
| C | -0.81467900 | -3.09316300 | -1.16607300 |
| C | -2.59918100 | -2.28258200 | 0.81124300  |
| H | -2.14444800 | -0.26831400 | 0.19940800  |
| C | -1.47329600 | -4.03435700 | -0.38806400 |
| H | -0.13205600 | -3.40043800 | -1.95006500 |
| C | -2.36875700 | -3.64683600 | 0.61260300  |
| H | -3.30202800 | -1.96396600 | 1.57497400  |
| H | -1.29369000 | -5.09002200 | -0.56686600 |
| C | -3.04954200 | -4.67114300 | 1.46936900  |
| H | -4.02238000 | -4.31707700 | 1.81718900  |
| H | -3.19015700 | -5.61103000 | 0.93126700  |
| H | -2.44218700 | -4.88729700 | 2.35553200  |
| C | 1.02413200  | 1.32208300  | 2.52854600  |
| H | 2.04931500  | 1.57581100  | 2.81839400  |
| C | 0.93812200  | -2.65905100 | 3.07589600  |

|   |             |             |             |
|---|-------------|-------------|-------------|
| H | 1.37555800  | -2.78348300 | 4.09614100  |
| H | 0.16059000  | -1.86228000 | 3.20290500  |
| H | 0.34728300  | -3.59258100 | 2.90977200  |
| O | 1.85311600  | -2.38645700 | 2.09813400  |
| H | 1.21671100  | -0.61567000 | 1.51839100  |
| H | 0.58046200  | 0.76232200  | 3.36163900  |
| C | -4.53067800 | 0.37967300  | -2.63888200 |
| H | -5.50040600 | 0.67151700  | -3.04768500 |
| H | -4.60689400 | 0.37546900  | -1.54400000 |
| H | -4.30937900 | -0.64090000 | -2.97601300 |
| O | -3.57240300 | 1.31085300  | -3.09990000 |
| H | -2.70898900 | 1.05219800  | -2.74716400 |

Energy= -1949,68681544 Hartree

**Table 19.** Optimized geometry and related energy and frequency for transition state **TS IV B**.

|   |             |             |             |
|---|-------------|-------------|-------------|
| C | 1.70807600  | -1.10623500 | 1.59051800  |
| C | 1.29943400  | -1.69699100 | 2.72134900  |
| H | 2.00086800  | -2.22845000 | 3.35086500  |
| H | 0.26775100  | -1.61689200 | 3.04347800  |
| O | 0.82792900  | -0.30059500 | 0.93635700  |
| C | 3.11073200  | -1.20234400 | 1.12838800  |
| C | 3.81375700  | -0.08079100 | 0.67211400  |
| C | 3.80356900  | -2.41469300 | 1.22488300  |
| C | 5.15611600  | -0.17032300 | 0.32101800  |
| C | 5.14320100  | -2.51099000 | 0.87565500  |
| H | 3.26997400  | -3.29327900 | 1.57167200  |
| C | 5.82264500  | -1.38515500 | 0.41888000  |
| H | 5.66955700  | 0.72579400  | -0.01241000 |
| H | 5.65499400  | -3.46430900 | 0.95456300  |
| H | 6.87071400  | -1.45010800 | 0.14522000  |
| O | 3.19252800  | 1.14597700  | 0.63567700  |
| C | 1.54611300  | 0.78073300  | -1.10454700 |
| C | 0.76266800  | -0.22934500 | -0.49115700 |
| N | -0.63971400 | -0.22820900 | -0.85965600 |
| C | -1.27841900 | 0.89154500  | -1.54352400 |
| H | -2.28697500 | 0.56801600  | -1.82504200 |
| H | -0.77797700 | 1.11673200  | -2.49238300 |
| C | -1.40847800 | 2.14595600  | -0.71424400 |
| C | -1.65822800 | 3.35373200  | -1.36935400 |
| C | -1.36087400 | 2.12969800  | 0.67775700  |
| C | -1.87213200 | 4.52110800  | -0.64650100 |
| H | -1.68761100 | 3.37936300  | -2.45562200 |
| C | -1.56819900 | 3.30029900  | 1.40243700  |
| H | -1.14469300 | 1.19945400  | 1.19044600  |
| C | -1.82869600 | 4.49774800  | 0.74511600  |
| H | -2.06741900 | 5.45159900  | -1.17023600 |
| H | -1.52377400 | 3.27488400  | 2.48689500  |
| H | -1.99065900 | 5.40900000  | 1.31191800  |

|   |             |             |             |
|---|-------------|-------------|-------------|
| S | -1.43080800 | -1.68776900 | -1.03252100 |
| O | -1.73231200 | -1.98646600 | -2.43382800 |
| O | -0.69188500 | -2.66862800 | -0.25093900 |
| C | -2.99092300 | -1.38124400 | -0.23225700 |
| C | -4.16544400 | -1.40069500 | -0.97076000 |
| C | -3.01103800 | -1.17390200 | 1.14505200  |
| C | -5.37743200 | -1.20197800 | -0.31751400 |
| H | -4.12891500 | -1.57274100 | -2.04047000 |
| C | -4.22639100 | -0.97938100 | 1.77935600  |
| H | -2.08473900 | -1.16773100 | 1.70926000  |
| C | -5.42818500 | -0.98893900 | 1.05980800  |
| H | -6.29838300 | -1.21487100 | -0.89211800 |
| H | -4.24688700 | -0.81787200 | 2.85296300  |
| C | -6.73461500 | -0.77846400 | 1.76489500  |
| H | -6.90633100 | -1.56392200 | 2.50742200  |
| H | -6.73991100 | 0.17603100  | 2.29967700  |
| H | -7.57129800 | -0.78319300 | 1.06418200  |
| C | 2.64988100  | 1.46095000  | -0.62860200 |
| H | 3.41014000  | 1.74798900  | -1.36209500 |
| H | 1.32325000  | -1.24051200 | -1.15153200 |
| H | 1.31450800  | 0.99001900  | -2.14652800 |
| C | 1.91382200  | -3.30896600 | -1.75025700 |
| H | 2.70447300  | -3.73639800 | -2.38840900 |
| H | 2.18652800  | -3.54694300 | -0.70987800 |
| H | 0.98541100  | -3.86139000 | -1.96905100 |
| O | 1.80166800  | -1.94149000 | -1.97990000 |
| C | 3.40502500  | 4.52820800  | -0.15808700 |
| H | 3.32895600  | 5.61127100  | -0.32702500 |
| H | 4.05308000  | 4.12796500  | -0.95664600 |
| H | 3.93981100  | 4.38354400  | 0.79582000  |
| O | 2.13190300  | 3.95438100  | -0.16136500 |
| H | 2.25192300  | 2.77605800  | -0.41757100 |

Energy= -1949,62346158 Hartree  
Frequency= 1378,98i cm<sup>-1</sup>

**Table 20.** Optimized geometry and related energy of the product **6a**.

|   |             |             |             |
|---|-------------|-------------|-------------|
| C | -2.84901000 | -0.11595000 | -0.72605100 |
| C | -3.45193900 | -0.00776100 | -1.91426700 |
| H | -4.34223300 | -0.58448500 | -2.12785800 |
| H | -3.07912700 | 0.68048500  | -2.66406400 |
| O | -1.80703200 | 0.71235700  | -0.43159000 |
| C | -3.29367300 | -1.05826500 | 0.32321200  |
| C | -3.47036300 | -0.63469300 | 1.64479300  |
| C | -3.54347700 | -2.39999100 | 0.01824000  |
| C | -3.88227600 | -1.52116500 | 2.63100800  |
| C | -3.96311300 | -3.28925400 | 0.99858700  |
| H | -3.37306300 | -2.74167800 | -0.99776100 |
| C | -4.12827100 | -2.85045100 | 2.30870400  |

|   |             |             |             |
|---|-------------|-------------|-------------|
| H | -4.02448500 | -1.15203400 | 3.64111300  |
| H | -4.14915200 | -4.32684900 | 0.74263800  |
| H | -4.45353600 | -3.53961700 | 3.08094500  |
| O | -3.33861300 | 0.70017000  | 1.98031000  |
| C | -0.93664000 | 0.95829200  | 1.80907600  |
| C | -0.79926700 | 0.24839100  | 0.49626600  |
| N | 0.50616900  | 0.45234400  | -0.07798300 |
| C | 1.21180100  | 1.74537500  | -0.00159400 |
| H | 2.18833200  | 1.59521000  | -0.47335800 |
| H | 1.40433800  | 1.95314100  | 1.06240100  |
| C | 0.50857200  | 2.91056100  | -0.65528400 |
| C | 0.12768600  | 3.99635600  | 0.13199500  |
| C | 0.26876200  | 2.95677400  | -2.03057000 |
| C | -0.48768700 | 5.10820200  | -0.43860100 |
| H | 0.31559500  | 3.96224000  | 1.20150500  |
| C | -0.34719200 | 4.06353100  | -2.60192900 |
| H | 0.56114700  | 2.11439900  | -2.64973900 |
| C | -0.72829000 | 5.14331100  | -1.80732700 |
| H | -0.77965500 | 5.94549100  | 0.18772500  |
| H | -0.52837800 | 4.08763000  | -3.67220100 |
| H | -1.20854500 | 6.00740900  | -2.25566500 |
| S | 1.11707400  | -0.69195200 | -1.10162700 |
| O | 0.25651400  | -1.87174600 | -0.95390600 |
| O | 1.32193300  | -0.16541000 | -2.44670800 |
| C | 2.71810300  | -1.05169800 | -0.42593000 |
| C | 2.83111000  | -1.40342200 | 0.91726300  |
| C | 3.82766800  | -1.01903700 | -1.25880400 |
| C | 4.07879000  | -1.72720100 | 1.42194700  |
| H | 1.95831200  | -1.41262400 | 1.56149500  |
| C | 5.07221600  | -1.34753600 | -0.73294000 |
| H | 3.71745800  | -0.73672600 | -2.29928300 |
| C | 5.21829800  | -1.70475900 | 0.60733800  |
| H | 4.17395400  | -1.99877100 | 2.46883400  |
| H | 5.94404900  | -1.32202100 | -1.37897700 |
| C | 6.56185700  | -2.04807900 | 1.17648400  |
| H | 6.54242200  | -3.02974200 | 1.65869300  |
| H | 7.33186400  | -2.05940500 | 0.40322500  |
| H | 6.85581700  | -1.32051800 | 1.93960100  |
| C | -2.10384400 | 1.13323100  | 2.42088700  |
| H | -2.18548300 | 1.70145100  | 3.34256600  |
| H | -0.92743500 | -0.82927900 | 0.61763600  |
| C | 1.83507000  | 1.18343600  | 4.06847800  |
| H | 1.81917800  | 1.56797500  | 5.11685500  |
| H | 1.12674200  | 0.31577100  | 4.07999100  |
| H | 2.84341000  | 0.71493600  | 3.95894500  |
| O | 1.54150300  | 2.12067000  | 3.11816900  |
| H | -0.03856000 | 1.37628000  | 2.29910800  |
| C | -1.42104500 | -2.77687600 | -3.99961600 |
| H | -2.01034600 | -3.41665900 | -4.66006500 |
| H | -0.42713300 | -2.64627800 | -4.44616300 |
| H | -1.91087400 | -1.79653600 | -3.94240200 |

O -1.35687200 -3.40842400 -2.73649100  
H -0.82353300 -2.85324400 -2.15026500  
Energy= -1949,68128687 Hartree

**3. Mulliken charges of the starting geometries and the main transition state geometries for the reaction mechanism A and B. The H atoms are omitted for legibility.**

**Figure 4.** Computed Mulliken charges for **I A** compound.

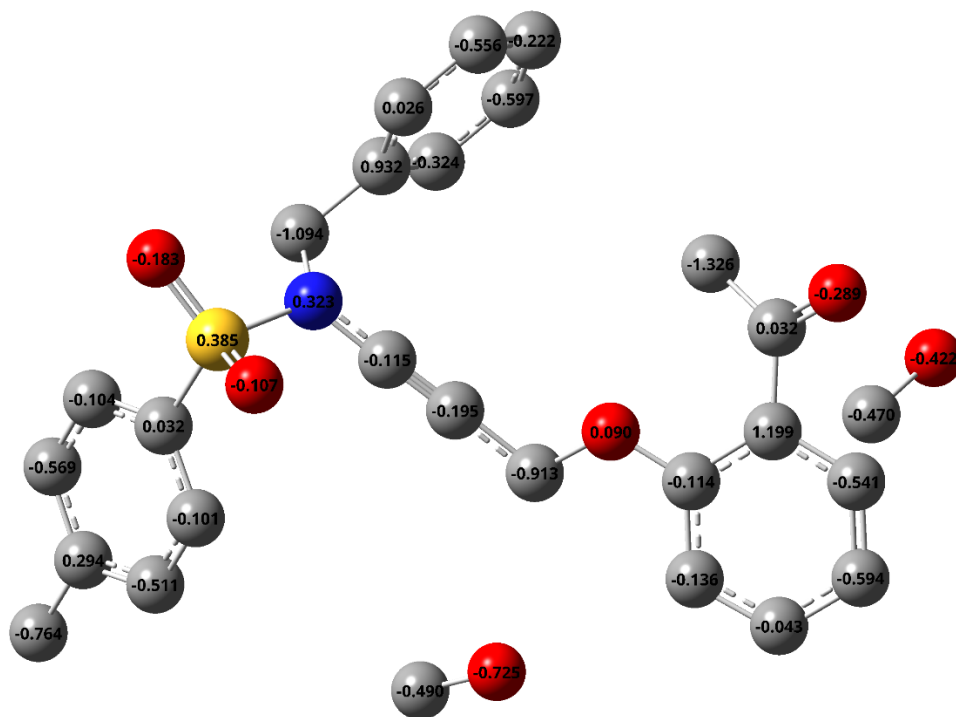

**Figure 5.** Computed Mulliken charges for transition state **TS IV A**.

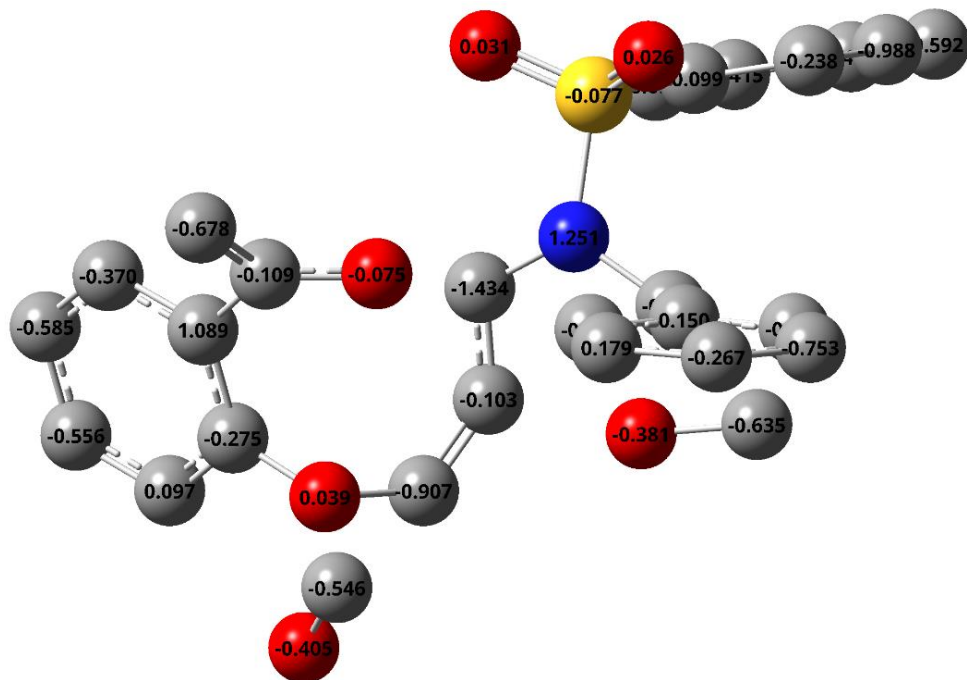

Figure 6. Computed Mulliken charges for **IB** compound.

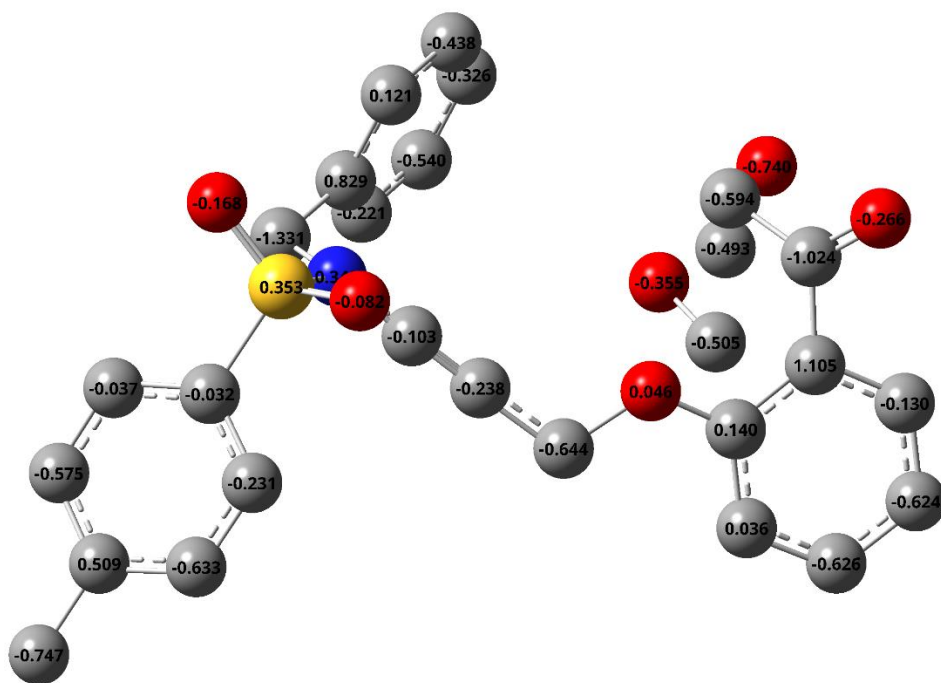

Figure 7. Computed Mulliken charges for transition state **TS II B**.



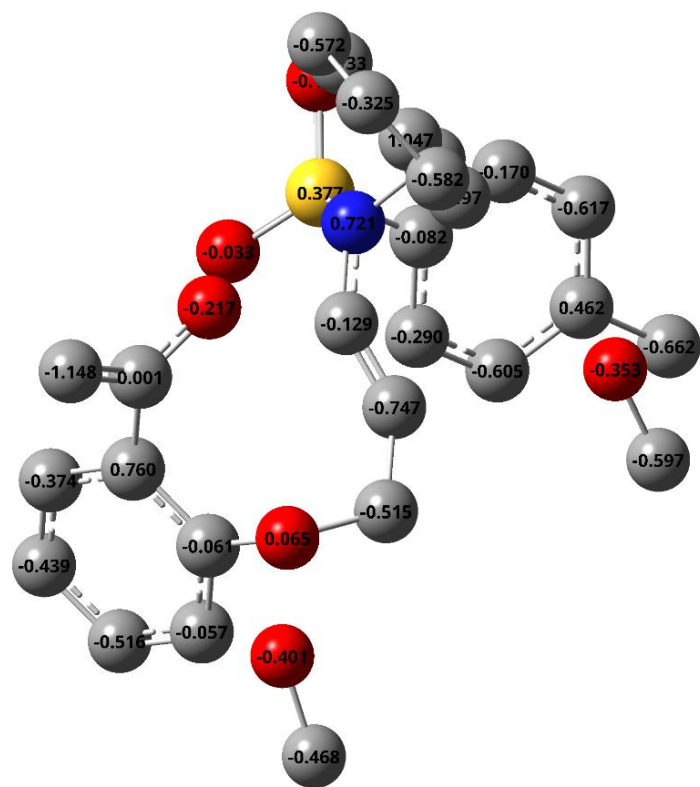

**Figure 8.** Computed Mulliken charges for transition state **TS IV B**.

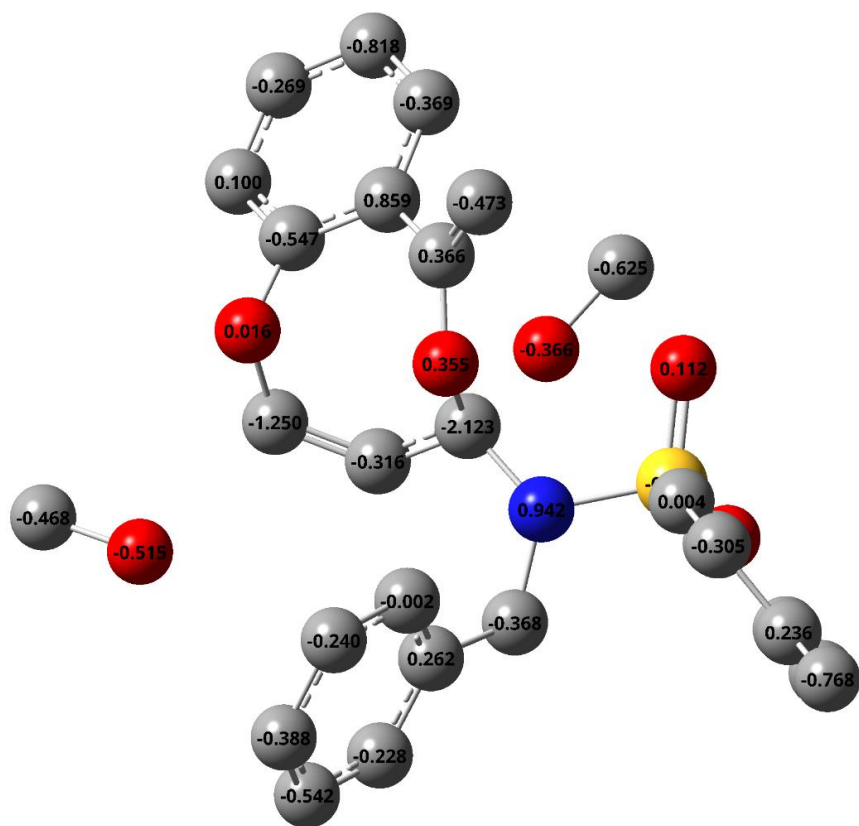

Supplement: d2qo00873d1.pdf [file d2qo00873d1.pdf]
